# Supplementary material for: Catalytic radical cascade cyclization of alkene-tethered enones to fused bicyclic cyclopropanols
Source: Royal Society of Chemistry journal article supplement (doi:10.1039/d1qo01312b), 2021-01-01
Supplement: d1qo01312b1.pdf [file d1qo01312b1.pdf]

# Supporting Information

## Catalytic Radical Cascade Cyclization of Alkene-Tethered Enones to Fused Bicyclic Cyclopropanols

Ying Xie,<sup>[a, b]</sup> Wei Huang,<sup>[a]</sup> Song Qin,<sup>[a]</sup> Shaomin Fu\*<sup>[a]</sup> and Bo Liu \*<sup>[a]</sup>

<sup>a</sup> Key Laboratory of Green Chemistry & Technology of Ministry of Education, College of Chemistry, Sichuan University, Chengdu, 610064, China

<sup>b</sup> School of Chemistry and Environmental Engineering, Sichuan University of Science & Engineering, 180 Hui Xing Road, Zigong 643000, China

E-mail: chembliu@scu.edu.cn; fsm09@aliyun.com

# Table of Contents

|                                                  |            |
|--------------------------------------------------|------------|
| <b>1. General information</b> .....              | <b>3</b>   |
| <b>2. Screening of Reaction Conditions</b> ..... | <b>4</b>   |
| <b>3. Experimental Procedures</b> .....          | <b>6</b>   |
| <b>4. Synthesis of compound 5</b> .....          | <b>29</b>  |
| <b>5. Mechanistic studies</b> .....              | <b>31</b>  |
| <b>6. X-ray Crystallographic Data:</b> .....     | <b>36</b>  |
| <b>7 Spectra of Products.</b> .....              | <b>41</b>  |
| <b>8. Computational procedures</b> .....         | <b>97</b>  |
| <b>9. References</b> .....                       | <b>124</b> |

## 1. General information

All reactions are carried out in flame-dried sealed tubes with magnetic stirring. Unless otherwise noted, all experiments are performed under argon atmosphere. All chemicals were purchased commercially and used without further purification, unless otherwise stated. Solvents are treated with CaH<sub>2</sub> or sodium and distilled prior to use. Purifications of reaction products are carried out by flash chromatography using Qingdao Haiyang Chemical Co. Ltd silica gel (200-300 mm) or Keshi Co. Ltd Aluminum oxide active (200-300). Infrared spectra (IR) are recorded on a Nexus 670FT-IR spectrophotometer and are reported as wavelength numbers (cm<sup>-1</sup>). <sup>1</sup>H NMR and <sup>13</sup>C NMR spectra are recorded with tetramethylsilane (TMS) as internal standard at ambient temperature unless otherwise indicated on a Bruker Avance DPX 400 Fourier Transform spectrometer operating at 400 MHz for <sup>1</sup>H NMR and 100 MHz for <sup>13</sup>C NMR. Chemical shifts are reported in parts per million (ppm) and coupling constants are reported as Hertz (Hz). Splitting patterns are designated as singlet (s), broad singlet (bs), doublet (d), triplet (t). Splitting patterns that could not be interpreted or easily visualized are designated as multiple (m). High resolution mass spectra (HRMS) are recorded on an IF-TOF spectrometer (Micromass). Oil bath was used for reactions that require heating. Low temperature reactor (ethanol bath) was used for reactions that require cooling. In <sup>1</sup>H/<sup>13</sup>C NMR spectrum, nomenclature for compounds **3a-3t** only refers to the depicted enantiomer.

## 2. Screening of Reaction Conditions

**2.1 Table 1.** The effect of the catalyst for the catalytic radical cascade cyclization of alkene-tethered enones.

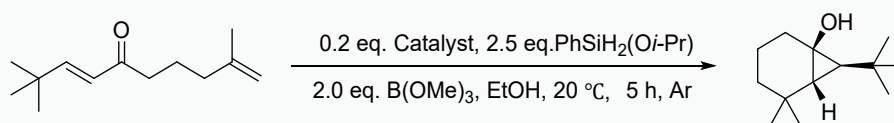

| Catalyst                                        | Yield%      |
|-------------------------------------------------|-------------|
| Fe(acac) <sub>3</sub>                           | 69%         |
| Fe(dpm) <sub>3</sub>                            | 45%         |
| Co(salen)                                       | mess        |
| Co(acac) <sub>2</sub>                           | mess        |
| Fe(TPP) <sub>3</sub>                            | mess        |
| Mn(acac) <sub>3</sub>                           | no reaction |
| Fe(OTf) <sub>3</sub>                            | no reaction |
| Fe <sub>2</sub> (SO <sub>4</sub> ) <sub>3</sub> | no reaction |
| FeCl <sub>3</sub>                               | trace       |

**2.2 Table 2.** The effect of the solvent for the catalytic radical cascade cyclization of alkene-tethered enones.

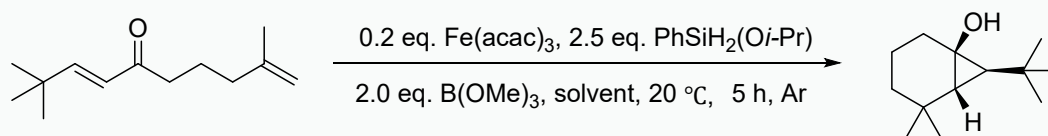

| Solvent                            | Yield (%) <sup>a</sup> |
|------------------------------------|------------------------|
| MeOH                               | 33%                    |
| EtOH                               | 69%                    |
| <i>i</i> -PrOH                     | 78%                    |
| <i>n</i> -PrOH                     | 90%                    |
| <i>n</i> -BuOH                     | trace                  |
| CF <sub>3</sub> CH <sub>2</sub> OH | 79%                    |

|                                                |     |
|------------------------------------------------|-----|
| C <sub>3</sub> H <sub>2</sub> F <sub>6</sub> O | 58% |
| CH <sub>3</sub> CN                             | 65% |
| EA                                             | 42% |
| Hexane                                         | 2%  |
| 1,4-dioxane                                    | 61% |
| THF                                            | 69% |
| DCE                                            | 25% |
| Toluene                                        | 13% |
| 1,4-dioxane: <i>n</i> -PrOH (5:1)              | 53% |
| THF: <i>n</i> -PrOH (5:1)                      | 49% |
| methyl borate (1.5 ml)                         | 84% |

<sup>a</sup> isolated yield.

**2.3 Table 3.** The effect of the additive for the catalytic radical cascade cyclization of alkene-tethered enones.

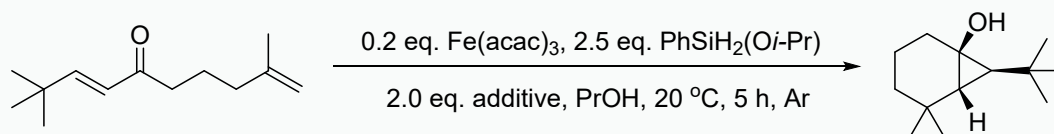

| Additive                           | Yield (%) <sup>a</sup> |
|------------------------------------|------------------------|
| B(OMe) <sub>3</sub>                | 90                     |
| B(Oi-Pr) <sub>3</sub>              | 57                     |
| (BPin) <sub>2</sub>                | 43                     |
| BF <sub>3</sub> ·Et <sub>2</sub> O | mess                   |
| -                                  | 68                     |

<sup>a</sup> isolated yield.

**2.4 Table 4.** The effect of the silane for the catalytic radical cascade cyclization of alkene-tethered enones.

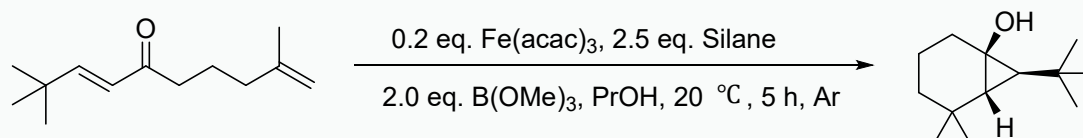

| Silanes                    | Yield (%) <sup>a</sup> |
|----------------------------|------------------------|
| PhSiH <sub>2</sub> (Oi-Pr) | 90                     |
| PhSiH <sub>3</sub>         | 32                     |

|                                        |             |
|----------------------------------------|-------------|
| Et <sub>3</sub> SiH <sub>2</sub>       | no reaction |
| <sup>t</sup> PrSiH <sub>2</sub>        | no reaction |
| Ph <sub>2</sub> SiH <sub>2</sub>       | 26          |
| (EtO) <sub>2</sub> CH <sub>3</sub> SiH | no reaction |

<sup>a</sup> isolated yield.

### 3. Experimental Procedures

#### 3.1 General procedure for the synthesis of substrate (1a – 1t)

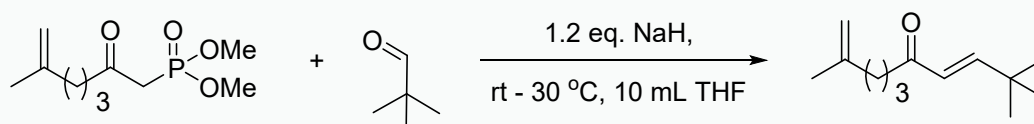

To the solution of the phosphonate <sup>[1]</sup> (524 mg, 2.0 mmol) in the 10 mL dry THF was added NaH (96 mg, 2.4 mmol) under Ar at rt. The reaction was stirred at rt for 30 min. Then aldehyde (1.2 eq.) was added. The mixture was stirred at 30 °C for another 24 h and quenched with saturated NH<sub>4</sub>Cl (10 mL). The organic layer was separated and water layer was extracted with EA and dried over Na<sub>2</sub>SO<sub>4</sub>. The combined organic layers were evaporated and the residue was purified via column chromatography to give desired product. <sup>[2]</sup> The other substrates could also be prepared using the similar methods.

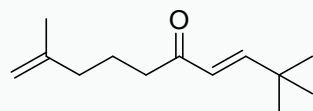

#### 2a

**Physical state:** colorless oil

**R<sub>f</sub>** = 0.5 (PE/EtOAc = 5:1; UV) 349.2 mg, 90% yield

**<sup>1</sup>H NMR** (400 MHz, CDCl<sub>3</sub>) δ 6.79 (d, *J* = 16.1 Hz, 1H), 5.99 (d, *J* = 16.1 Hz, 1H), 4.70 (s, 1H), 4.66 (s, 1H), 2.54 – 2.49 (m, 2H), 2.10 – 1.99 (m, 2H), 1.80 – 1.70 (m, 2H), 1.69 (s, 3H), 1.06 (s, 9H).

**<sup>13</sup>C NMR** (100MHz, CDCl<sub>3</sub>) δ 201.15, 156.84, 145.11, 125.41, 110.48, 39.51, 37.15, 33.68, 28.70, 22.19, 21.92.

**HRMS(ESI<sup>+</sup>)** *m/z* Calculated for C<sub>13</sub>H<sub>23</sub>O [M+H]<sup>+</sup>: 195.1749, found: 195.1749.

**IR (thin film) ν<sub>max</sub> (cm<sup>-1</sup>):** 2962, 1720, 1620, 1364, 988.

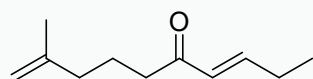

#### 2b

**Physical state:** colorless oil

Rf = 0.5 (PE/EtOAc = 5:1; UV) 252.32 mg, 76% yield

<sup>1</sup>H NMR (400 MHz, CDCl<sub>3</sub>) δ 6.87 (dt, *J* = 15.9, 6.4 Hz, 1H), 6.08 (dt, *J* = 15.9, 1.7 Hz, 1H), δ 4.72 (s, 1H), 4.67 (s, 1H), 2.52 (t, *J* = 7.6 Hz, 2H), 2.23 (qdd, *J* = 7.5, 6.3, 1.7 Hz, 2H), 2.03 (t, *J* = 7.4 Hz, 2H), 1.75 (q, *J* = 7.6 Hz, 2H) 1.70 (s, 3H), 1.07 (t, *J* = 7.4 Hz, 3H).

<sup>13</sup>C NMR (100 MHz, CDCl<sub>3</sub>) δ 200.77, 148.61, 145.16, 129.45, 110.48, 39.29, 37.16, 25.52, 22.22, 21.92, 12.26.

HRMS(ESI<sup>+</sup>) *m/z* Calculated for C<sub>11</sub>H<sub>19</sub>O [M+H]<sup>+</sup>: 167.1430, found: 167.1431.

IR (thin film) ν<sub>max</sub> (cm<sup>-1</sup>): 2934, 1688, 1625, 1446, 1115.

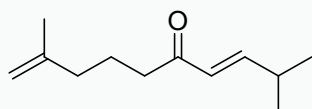

2c

Physical state: colorless oil

Rf = 0.5 (PE/EtOAc = 5:1; UV) 338.4 mg, 94% yield

<sup>1</sup>H NMR (400 MHz, CDCl<sub>3</sub>) δ 6.79 (dd, *J* = 16.0, 6.7 Hz, 1H), 6.04 (dd, *J* = 16.0, 1.5 Hz, 1H), 4.73 (s, 1H), 4.69 (s, 1H), 2.53 (t, *J* = 7.4 Hz, 2H), 2.46 (qd, *J* = 6.7, 1.5 Hz, 1H), 2.04 (t, *J* = 7.5 Hz, 2H), 1.85 – 1.74 (q, *J* = 7.2 Hz, 2H), 1.72 (s, 3H), 1.07 (d, *J* = 6.8 Hz, 6H).

<sup>13</sup>C NMR (100 MHz, CDCl<sub>3</sub>) δ 201.06, 153.37, 145.19, 127.55, 110.49, 39.38, 37.17, 31.11, 29.71, 22.22, 21.95, 21.34.

HRMS(ESI<sup>+</sup>) *m/z* Calculated for C<sub>12</sub>H<sub>21</sub>O [M+H]<sup>+</sup>: 181.1587, found: 181.1589.

IR (thin film) ν<sub>max</sub> (cm<sup>-1</sup>): 2923, 2851, 1460, 1377.

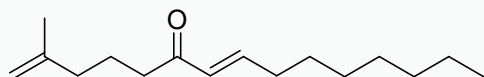

2d

Physical state: colorless oil

Rf = 0.5 (PE/EtOAc = 5:1; UV) 424.8 mg, 90% yield

<sup>1</sup>H NMR (400 MHz, CDCl<sub>3</sub>) δ 6.82 (dt, *J* = 15.9, 6.9 Hz, 1H), 6.09 (d, *J* = 15.9 Hz, 1H), 4.73 (s, 1H), 4.68 (s, 1H), 2.52 (t, *J* = 7.4 Hz, 2H), 2.20 (qdd, *J* = 7.1 Hz, *J* = 1.6 Hz, 2H), 2.04 (t, *J* = 7.5 Hz, 2H), 1.77 (q, *J* = 7.5 Hz, 2H), 1.71 (s, 3H), 1.46 (t, *J* = 7.3 Hz, 2H), 1.40 – 1.15 (m, 8H), 0.88 (t, *J* = 6.6 Hz, 3H).

<sup>13</sup>C NMR (100 MHz, CDCl<sub>3</sub>) δ 200.74, 147.48, 145.18, 130.35, 110.48, 39.31, 37.18, 32.47, 31.74, 29.16, 29.06, 28.13, 22.63, 22.22, 21.97, 14.08.

HRMS(ESI<sup>+</sup>) *m/z* Calculated for C<sub>16</sub>H<sub>29</sub>O [M+H]<sup>+</sup>: 237.2213, found: 237.2213.

IR (thin film) ν<sub>max</sub> (cm<sup>-1</sup>): 2962, 1678, 1625, 1364, 984.

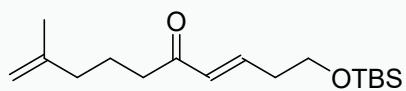

**2e**

**Physical state:** colorless oil

**Rf** = 0.5 (PE/EtOAc = 5:1; UV) 544.6 mg, 92% yield

**<sup>1</sup>H NMR** (400 MHz, CDCl<sub>3</sub>) δ 6.78 (dt, *J* = 16.0, 7.0 Hz, 1H), 6.08 (dt, *J* = 16.0, 1.5 Hz, 1H), 4.67 (s, 1H), 4.62 (s, 1H), 3.68 (t, *J* = 6.4 Hz, 2H), 2.47 (t, *J* = 7.6 Hz, 2H), 2.37 (qd, *J* = 6.5, 1.5 Hz, 2H), 1.98 (t, *J* = 7.6 Hz, 2H), 1.75 – 1.67 (m, 2H), 1.66 (s, 3H), 0.84 (s, 9H), 0.00 (s, 6H).

**<sup>13</sup>C NMR** (100 MHz, CDCl<sub>3</sub>) δ 200.50, 145.10, 143.94, 131.93, 110.52, 61.60, 39.15, 37.16, 35.92, 25.87, 22.21, 21.89, 18.29, -5.33.

**HRMS(ESI<sup>+</sup>)** *m/z* Calculated for C<sub>17</sub>H<sub>33</sub>O<sub>2</sub>Si [M+H]<sup>+</sup>: 297.2244, found: 297.2241.

**IR (thin film) ν<sub>max</sub> (cm<sup>-1</sup>):** 2925, 2856, 1254, 1099, 836.

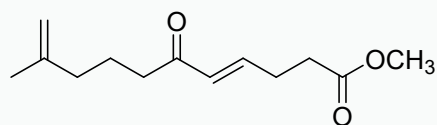

**2f**

**Physical state:** colorless oil

**Rf** = 0.4 (PE/EtOAc = 5:1; UV) 259.8 mg, 58% yield

**<sup>1</sup>H NMR** (400 MHz, CDCl<sub>3</sub>) δ 6.81 (dt, *J* = 16.0, 6.2 Hz, 1H), 6.12 (d, *J* = 15.9 Hz, 1H), 4.73 (s, 1H), 4.67 (s, 1H), 3.69 (s, 3H), 2.62 – 2.44 (m, 6H), 2.03 (t, *J* = 7.5 Hz, 2H), 1.80 - 1.74 (m, 2H), 1.71 (s, 3H).

**<sup>13</sup>C NMR** (100 MHz, CDCl<sub>3</sub>) δ 200.29, 172.73, 145.08, 144.33, 130.92, 110.54, 51.80, 39.52, 37.10, 32.32, 27.39, 22.20, 21.78.

**HRMS(ESI<sup>+</sup>)** *m/z* Calculated for C<sub>13</sub>H<sub>21</sub>O<sub>3</sub> [M+H]<sup>+</sup>: 225.1485, found: 225.1469.

**IR (thin film) ν<sub>max</sub> (cm<sup>-1</sup>):** 2932, 1676, 1456, 1118, 885.

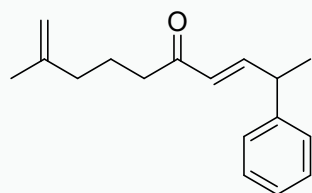

**2g**

**Physical state:** colorless oil

**Rf** = 0.5 (PE/EtOAc = 5:1; UV) 242 mg, 50% yield

**<sup>1</sup>H NMR** (400 MHz, CDCl<sub>3</sub>) δ 7.32 (t, *J* = 7.4 Hz, 2H), 7.24 (d, *J* = 7.9 Hz, 1H), 7.21 – 7.15 (m, 2H), 6.95 (dd, *J* = 15.9, 6.7 Hz, 1H), 6.08 (dd, *J* = 16.0, 1.6 Hz, 1H), 4.71 (s, 1H), 4.66 (s,



1H), 3.62 (td,  $J = 6.9, 1.5$  Hz, 1H), 2.52 (t,  $J = 7.4$  Hz, 2H), 2.02 (t,  $J = 7.5$  Hz, 2H), 1.77 – 1.73 (m, 2H), 1.69 (s, 3H), 1.43 (d,  $J = 7.0$  Hz, 3H).

$^{13}\text{C}$  NMR (100 MHz,  $\text{CDCl}_3$ )  $\delta$  200.78, 150.45, 145.10, 143.41, 128.81, 128.75, 127.35, 126.81, 110.54, 42.22, 39.43, 37.13, 22.21, 21.84, 20.27.

HRMS(ESI<sup>+</sup>)  $m/z$  Calculated for  $\text{C}_{17}\text{H}_{23}\text{O}$   $[\text{M}+\text{H}]^+$ : 243.1743, found: 243.1741.

IR (thin film)  $\nu_{\text{max}}$  ( $\text{cm}^{-1}$ ): 2967, 1672, 1625, 1451, 887, 699.

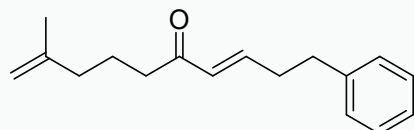

## 2h

Physical state: colorless oil

Rf = 0.5 (PE/EtOAc = 5:1; UV) 338.8 mg, 70% yield.

$^1\text{H}$  NMR (400 MHz,  $\text{CDCl}_3$ )  $\delta$  7.29(t,  $J = 7.2$  Hz, 2H), 7.22-7.16(m, 3H) 6.84 (dt,  $J = 15.9, 6.8$  Hz, 1H), 6.10 (dt,  $J = 15.9, 1.5$  Hz, 1H), 4.72 (s, 1H), 4.67 (s, 1H), 2.79 (t,  $J = 7.7$  Hz, 2H), 2.56 – 2.48 (m, 4H), 2.02 (t,  $J = 7.6$  Hz, 2H), 1.79 – 1.72 (m, 2H), 1.71 (s, 3H).

$^{13}\text{C}$  NMR (100 MHz,  $\text{CDCl}_3$ )  $\delta$  200.54, 145.89, 145.13, 140.75, 130.80, 128.51, 128.35, 126.22, 110.52, 39.40, 37.15, 34.47, 34.14, 22.22, 21.92.

HRMS(ESI<sup>+</sup>)  $m/z$  Calculated for  $\text{C}_{17}\text{H}_{23}\text{O}$   $[\text{M}+\text{H}]^+$ : 243.1743, found: 243.1739.

IR (thin film)  $\nu_{\text{max}}$  ( $\text{cm}^{-1}$ ): 2932, 1670, 1453, 886, 746, 698.

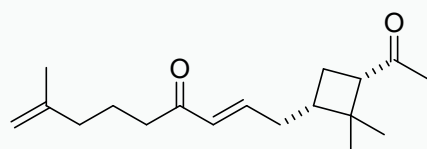

## 2i

Physical state: colorless oil

Rf = 0.4 (PE/EtOAc = 5:1; UV) 342.2 mg, 62% yield. (dr = 5.2:1)

$^1\text{H}$  NMR (400 MHz,  $\text{CDCl}_3$ )  $\delta$  6.71 (dt,  $J = 15.8, 6.9$  Hz, 1H), 6.10 (dt,  $J = 15.7, 1.5$  Hz, 1H), 4.73 (s, 1H), 4.67 (s, 1H), 2.85 (dd,  $J = 9.9, 7.5$  Hz, 1H), 2.50 (t,  $J = 7.4$  Hz, 2H), 2.34 – 2.18 (m, 1H), 2.17 – 2.09 (m, 1H), 2.04 (s, 3H), 2.03 (s, 2H), 1.98 – 1.90 (m, 1H), 1.83 – 1.73 (m, 2H), 1.71 (s, 3H), 1.58 (s, 2H), 1.30 (s, 3H), 0.88 (s, 3H).

$^{13}\text{C}$  NMR (100 MHz,  $\text{CDCl}_3$ )  $\delta$  207.55, 200.35, 145.11, 144.81, 130.92, 110.53, 54.09, 43.48, 40.79, 39.55, 37.14, 33.29, 30.54, 30.21, 23.03, 22.21, 21.91, 17.32.

HRMS(ESI<sup>+</sup>)  $m/z$  Calculated for  $\text{C}_{18}\text{H}_{29}\text{O}_2$   $[\text{M}+\text{H}]^+$ : 277.2162, found: 277.2161

IR (thin film)  $\nu_{\text{max}}$  ( $\text{cm}^{-1}$ ): 2902, 2848, 1676, 1456, 885.

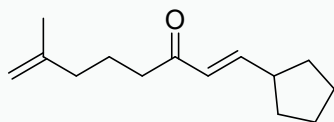

**2j**

**Physical state:** colorless oil

**Rf** = 0.5 (PE/EtOAc = 5:1; UV) 210.2 mg, 51% yield.

**<sup>1</sup>H NMR** (400 MHz, CDCl<sub>3</sub>) δ 6.80 (dd, *J* = 15.8, 7.9 Hz, 1H), 6.09 (d, *J* = 1.2 Hz, 1H), 4.73 (s, 1H), 4.68 (s, 1H), 2.59 (q, *J* = 8.1 Hz, 1H), 2.52 (t, *J* = 7.4 Hz, 2H), 2.02 (t, *J* = 7.5 Hz, 2H), 1.84 (tdd, *J* = 7.3, 5.5, 3.5 Hz, 2H), 1.77 (q, *J* = 7.5 Hz, 2H), 1.71 (s, 3H), 1.69 – 1.59 (m, 4H), 1.44 – 1.35 (m, 2H).

**<sup>13</sup>C NMR** (100 MHz, CDCl<sub>3</sub>) δ 200.87, 151.50, 145.17, 128.41, 110.47, 43.06, 39.38, 37.18, 32.54, 25.31, 22.22, 21.97.

**HRMS(ESI<sup>+</sup>)** *m/z* Calculated for C<sub>14</sub>H<sub>23</sub>O [M+H]<sup>+</sup>: 207.1743, found: 207.1743.

**IR (thin film) ν<sub>max</sub> (cm<sup>-1</sup>):** 2950, 2868, 1669, 1625, 1451, 1371, 885.

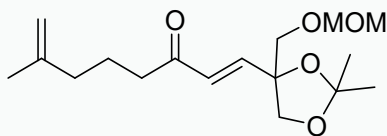

**2k**

**Physical state:** colorless oil

**Rf** = 0.4 (PE/EtOAc = 5:1; UV) 386.9 mg, 62% yield.

**<sup>1</sup>H NMR** (400 MHz, CDCl<sub>3</sub>) δ 6.91 (d, *J* = 15.8 Hz, 1H), 6.47 (d, *J* = 15.8 Hz, 1H), 4.73 (s, 1H), 4.68 (s, 1H), 4.64 (s, 2H), 4.14 (d, *J* = 8.8 Hz, 1H), 3.85 (dd, *J* = 8.8 Hz, *J* = 0.6 Hz, 1H), 3.60 (d, *J* = 9.6 Hz, 1H), 3.51 (d, *J* = 9.6 Hz, 1H), 3.36 (s, 3H), 2.56 (t, *J* = 7.4 Hz, 2H), 2.04 (t, *J* = 7.5 Hz, 2H), 1.79 – 1.71 (m, 2H), 1.71 (s, 3H), 1.46 (s, 3H), 1.42 (s, 3H).

**<sup>13</sup>C NMR** (100 MHz, CDCl<sub>3</sub>) δ 200.13, 145.02, 144.85, 128.84, 110.84, 110.59, 96.72, 82.04, 71.01, 70.77, 67.99, 55.51, 40.36, 37.08, 26.86, 26.11, 25.62, 22.20, 21.68.

**HRMS(ESI<sup>+</sup>)** *m/z* Calculated for C<sub>17</sub>H<sub>29</sub>O<sub>5</sub> [M+H]<sup>+</sup>: 313.2010, found: 313.2008.

**IR (thin film) ν<sub>max</sub> (cm<sup>-1</sup>):** 2936, 1677, 1371, 1110, 1044.

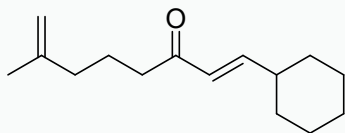

**2l**

**Physical state:** colorless oil

**Rf** = 0.5 (PE/EtOAc = 5:1; UV) 286 mg, 65% yield.

<sup>1</sup>H NMR (400 MHz, CDCl<sub>3</sub>) δ 6.76 (dd, *J* = 16.0, 6.8 Hz, 1H), 6.04 (dd, *J* = 16.0, 1.4 Hz, 1H), 4.73 (s, 1H), 4.68 (s, 1H), 2.53 (t, *J* = 7.4 Hz, 2H), 2.13 (tdtd, *J* = 7.9, 6.6, 3.3, 1.6 Hz, 1H), 2.04 (t, *J* = 7.5 Hz, 2H), 1.78 – 1.73 (m, 6H), 1.71 (s, 3H), 1.29 (qt, *J* = 13.6, 2.7 Hz, 2H), 1.24 – 1.08 (m, 3H).

<sup>13</sup>C NMR (100 MHz, CDCl<sub>3</sub>) δ 201.09, 152.21, 145.16, 127.85, 110.47, 40.60, 39.34, 37.17, 31.80, 25.93, 25.72, 22.21, 21.98.

HRMS(ESI<sup>+</sup>) *m/z* Calculated for C<sub>15</sub>H<sub>25</sub>O [M+H]<sup>+</sup>: 221.1900, found: 221.1893.

IR (thin film) *v*<sub>max</sub> (cm<sup>-1</sup>): 2925, 2832, 1672, 1449, 980.

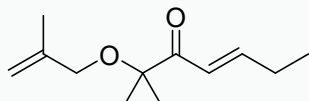

## 2m

**Physical state:** colorless oil

**Rf** = 0.5 (PE/EtOAc = 5:1; UV) 356.7 mg, 91% yield.

<sup>1</sup>H NMR (400 MHz, CDCl<sub>3</sub>) δ 7.09 (dt, *J* = 15.6, 6.3 Hz, 1H), 6.74 (dt, *J* = 15.6, 1.7 Hz, 1H), 5.03 (s, 1H), 4.89 (s, 1H), 3.70 (s, 2H), 2.29 – 2.22 (m, 2H), 1.75 (s, 3H), 1.35 (s, 6H), 1.08 (t, *J* = 7.4 Hz, 3H).

<sup>13</sup>C NMR (100 MHz, CDCl<sub>3</sub>) δ 202.99, 150.25, 142.32, 122.85, 111.54, 81.40, 68.36, 25.69, 23.15, 19.78, 12.23.

HRMS(ESI<sup>+</sup>) *m/z* Calculated for C<sub>12</sub>H<sub>21</sub>O [M+H]<sup>+</sup>: 197.1536, found: 197.1536

IR (thin film) *v*<sub>max</sub> (cm<sup>-1</sup>): 2973, 1697, 1625, 1170, 1071.

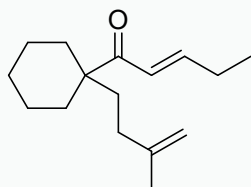

## 2n

**Physical state:** colorless oil

**Rf** = 0.5 (PE/EtOAc = 5:1; UV) 365 mg, 78% yield.

<sup>1</sup>H NMR (400 MHz, CDCl<sub>3</sub>) δ 6.99 (dt, *J* = 15.2, 6.5 Hz, 1H), 6.51 (dt, *J* = 15.2, 1.6 Hz, 1H), 4.66 (s, 1H), 4.62 (s, 1H), 2.27 – 2.19 (m, 2H), 2.06 – 2.02 (m, 2H), 1.80 – 1.76 (m, 2H), 1.67 (s, 3H), 1.64 – 1.56 (m, 5H), 1.36 – 1.26 (m, 5H), 1.07 (t, *J* = 7.4 Hz, 3H).

<sup>13</sup>C NMR (100 MHz, CDCl<sub>3</sub>) δ 203.95, 148.88, 146.05, 123.59, 109.50, 50.31, 36.96, 33.25, 31.74, 26.20, 25.61, 22.89, 22.62, 12.52.

HRMS(ESI<sup>+</sup>) *m/z* Calculated for C<sub>16</sub>H<sub>27</sub>O [M+H]<sup>+</sup>: 235.2056, found: 235.2055.

IR (thin film) *v*<sub>max</sub> (cm<sup>-1</sup>): 2967, 2935, 1672, 1628, 977.

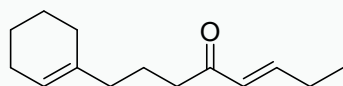

**2o**

**Physical state:** colorless oil

**Rf** = 0.5 (PE/EtOAc = 5:1; UV) 300.7 mg, 73% yield.

**<sup>1</sup>H NMR** (400 MHz, CDCl<sub>3</sub>) δ 6.87 (dt, *J* = 15.9, 6.3 Hz, 1H), 6.09 (dt, *J* = 15.8, 1.7 Hz, 1H), 5.39 (s, 1H), 2.50 (t, *J* = 7.4 Hz, 2H), 2.29 – 2.18 (m, 2H), 2.01 – 1.86 (m, 6H), 1.72 (ddd, *J* = 7.4, 6.8 Hz, 2H), 1.66 – 1.48 (m, 4H), 1.08 (t, *J* = 7.4 Hz, 3H).

**<sup>13</sup>C NMR** (100 MHz, CDCl<sub>3</sub>) δ 200.98, 148.45, 137.02, 129.46, 121.60, 39.51, 37.48, 28.08, 25.50, 25.22, 22.96, 22.53, 22.21, 12.27.

**HRMS(ESI<sup>+</sup>)** *m/z* Calculated for C<sub>14</sub>H<sub>23</sub>O [M+H]<sup>+</sup>: 207.1743, found: 207.1747.

**IR (thin film) ν<sub>max</sub> (cm<sup>-1</sup>):** 2960, 1674, 1625, 1364, 984, 889.

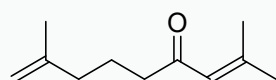

**2p**

**Physical state:** colorless oil

**Rf** = 0.5 (PE/EtOAc = 5:1; UV) 365.6 mg, 80 % yield

**<sup>1</sup>H NMR** (400 MHz, CDCl<sub>3</sub>) δ 6.07 (p, *J* = 1.3 Hz, 1H), 4.72 (s, 1H), 4.67 (s, 1H), 2.40 (t, *J* = 7.4 Hz, 2H), 2.14 (d, *J* = 1.3 Hz, 3H), 2.02 (t, *J* = 7.9 Hz, 2H), 1.88 (d, *J* = 1.4 Hz, 3H), 1.80 – 1.64 (m, 5H).

**<sup>13</sup>C NMR** (100 MHz, CDCl<sub>3</sub>) δ 201.00, 154.82, 145.27, 123.81, 110.33, 43.56, 37.17, 27.63, 22.21, 21.95, 20.66.

**HRMS(ESI<sup>+</sup>)** *m/z* Calculated for C<sub>11</sub>H<sub>19</sub>O [M+H]<sup>+</sup>: 167.1430, found: 167.1439.

**IR (thin film) ν<sub>max</sub> (cm<sup>-1</sup>):** 2934, 1688, 1620, 1446, 1110.

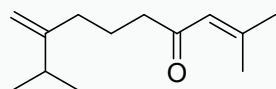

**2q**

**Physical state:** colorless oil

**Rf** = 0.5 (PE/EtOAc = 5:1; UV) 232.8 mg, 60% yield.

**<sup>1</sup>H NMR** (400 MHz, CDCl<sub>3</sub>) δ 6.00 (s, 1H), 4.69 (s, 1H), 4.61 (d, *J* = 1.6 Hz, 1H), 2.34 (t, *J* = 7.4 Hz, 2H), 2.15 (qd, *J* = 6.8, 1.1 Hz, 1H), 2.07 (s, 3H), 1.96 (t, *J* = 7.7 Hz, 2H), 1.81 (s, 3H), 1.71 – 1.67 (m, 2H), 0.95 (d, *J* = 6.9 Hz, 6H).

**<sup>13</sup>C NMR** (100 MHz, CDCl<sub>3</sub>) δ 200.13, 154.32, 153.84, 122.80, 105.73, 42.84, 32.82, 32.56, 26.63, 21.53, 20.81, 19.67.

**HRMS(ESI<sup>+</sup>)** *m/z* Calculated for C<sub>13</sub>H<sub>23</sub>O [M+H]<sup>+</sup>: 195.1743, found: 195.1743.

**IR (thin film)  $\nu_{\max}$  (cm<sup>-1</sup>):** 2959, 2925, 1687, 1621, 1446.

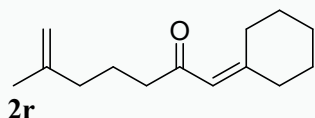

**Physical state:** colorless oil

**Rf** = 0.5 (PE/EtOAc = 5:1; UV) 313.2 mg, 76% yield.

**<sup>1</sup>H NMR** (400 MHz, CDCl<sub>3</sub>)  $\delta$  5.96 (s, 1H), 4.71 (s, 1H), 4.67 (s, 1H), 2.79 (s, 2H), 2.40 (t,  $J$  = 7.2 Hz, 2H), 2.15 (t,  $J$  = 6.1 Hz, 2H), 2.02 (t,  $J$  = 7.7 Hz, 3H), 1.83 – 1.61 (m, 10H).

**<sup>13</sup>C NMR** (100 MHz, CDCl<sub>3</sub>)  $\delta$  201.84, 161.69, 145.34, 121.04, 110.36, 43.77, 38.11, 37.19, 31.23, 29.97, 28.82, 27.93, 26.28, 25.00, 22.24, 22.02, 21.90.

**HRMS(ESI<sup>+</sup>)**  $m/z$  Calculated for C<sub>14</sub>H<sub>23</sub>O [M+H]<sup>+</sup>: 207.1743, found: 207.1746

**IR (thin film)  $\nu_{\max}$  (cm<sup>-1</sup>):** 2929, 2856, 1712, 1620, 1447, 1095.

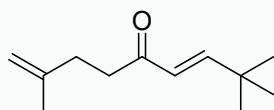

2s

**Physical state:** colorless oil

**Rf** = 0.5 (PE/EtOAc = 5:1; UV) 262.8 mg, 73% yield.

**<sup>1</sup>H NMR** (400 MHz, CDCl<sub>3</sub>)  $\delta$  6.84 (d,  $J$  = 16.1 Hz, 1H), 6.03 (d,  $J$  = 16.1 Hz, 1H), 4.74 (s, 1H), 4.68 (s, 1H), 2.78 – 2.56 (m, 2H), 2.37 – 2.26 (m, 2H), 1.75 (s, 3H), 1.09 (s, 9H).

**<sup>13</sup>C NMR** (100 MHz, CDCl<sub>3</sub>)  $\delta$  200.58, 157.06, 144.75, 125.29, 110.07, 38.49, 33.74, 31.86, 28.71, 22.68.

**HRMS(ESI<sup>+</sup>)**  $m/z$  Calculated for C<sub>12</sub>H<sub>21</sub>O [M+H]<sup>+</sup>: 181.1587, found: 181.1598.

**IR (thin film)  $\nu_{\max}$  (cm<sup>-1</sup>):** 2962, 1672, 1625, 1364, 984.

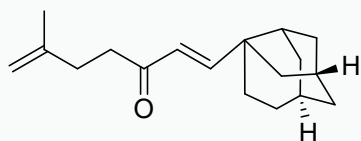

2t

**Physical state:** colorless oil

**Rf** = 0.5 (PE/EtOAc = 5:1; UV) 103.2 mg, 20% yield.

**<sup>1</sup>H NMR** (400 MHz, CDCl<sub>3</sub>)  $\delta$  6.67 (d,  $J$  = 16.2 Hz, 1H), 5.97 (d,  $J$  = 16.2 Hz, 1H), 4.73 (s, 1H), 4.68 (s, 1H), 2.71 – 2.67 (m, 2H), 2.32 (t,  $J$  = 8 Hz, 2H), 2.03 (s, 3H), 1.74 (m, 5H), 1.71 – 1.54 (m, 10H).

**<sup>13</sup>C NMR** (100 MHz, CDCl<sub>3</sub>)  $\delta$  200.81, 156.89, 144.82, 125.14, 110.06, 41.18, 38.43, 36.61, 35.70, 31.94, 28.07, 22.70.

**HRMS(ESI<sup>+</sup>)**  $m/z$  Calculated for C<sub>18</sub>H<sub>27</sub>O [M+H]<sup>+</sup>: 259.2056, found: 259.2059.

IR (thin film)  $\nu_{\max}$  (cm<sup>-1</sup>): 2902, 2848, 1672, 1451, 885.

### 3.2 General procedure for the synthesis of **2u** and **2v**.

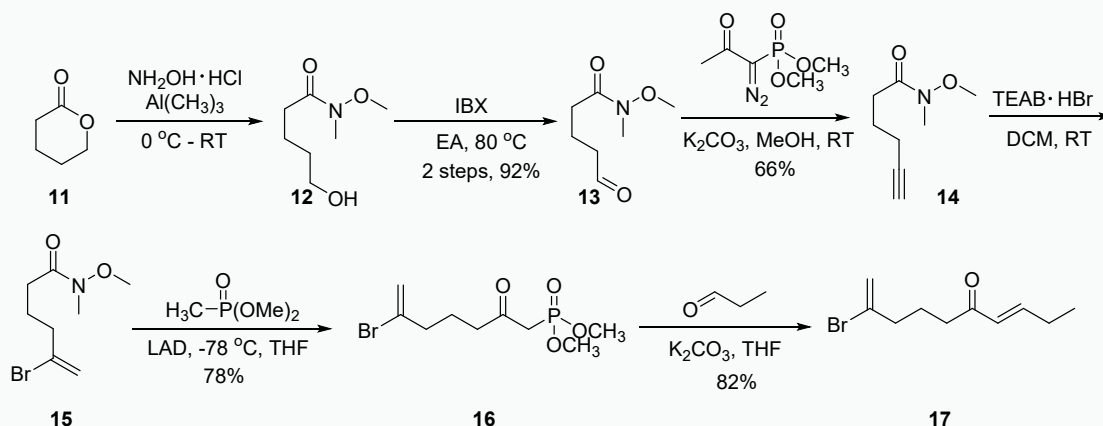

To solution of *N*, *O*-dimethylhydroxyl-amine hydrochloride (11.7 g, 120 mmol) in dry CH<sub>2</sub>Cl<sub>2</sub> (50 mL) at 0°C was added the AlMe<sub>3</sub> (60 mL, 120 mmol, 2.0 M in hexane). The reaction was stirred at 0°C for 20 min and tetrahydro-2H-pyran-2-one (8.0 g, 80 mmol) was added slowly. Then the reaction was stirred at 0°C for 1 h. The DCM (30 mL) was added to the above reaction and quenched with aq. HCl (15 mL, 0.1 N). The residue was extracted with DCM (4×10 mL). The organic layer was separated, dried, filtered and concentrated under reduced pressure. The residue was used for the next step without further purified.<sup>[3]</sup>

To a suspension of IBX (44.8 g, 160 mmol) in EA (250 mL) was added above residue and the resulting mixture was stirred at 80°C for 24 h. Then, the reaction was filtrated and concentrated under reduced pressure. The crude product was purified on SiO<sub>2</sub> to give the *N*-methoxy-*N*-methyl-5-oxopentanamide. The <sup>1</sup>H and <sup>13</sup>C NMR spectral data for the rest of *N*-methoxy-*N*-methyl-5-oxopentanamide showed good agreement with literature data <sup>[4]</sup>

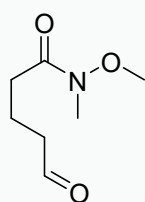

#### 13

**Physical state:** colorless oil

**Rf** = 0.5 (PE/EtOAc = 1:1; anisaldehyde) 11.7 g, 92% yield.

<sup>1</sup>H NMR (400 MHz, CDCl<sub>3</sub>)  $\delta$  9.75 (s, 1H), 3.66 (s, 3H), 3.16 (s, 3H), 2.52 (td,  $J$  = 7.1, 1.5 Hz, 2H), 2.44 (dt,  $J$  = 21.9, 7.1 Hz, 2H), 1.95 (p,  $J$  = 7.2 Hz, 1H).<sup>[4]</sup>

<sup>13</sup>C NMR (100 MHz, CDCl<sub>3</sub>)  $\delta$  202.14, 176.44, 61.23, 43.13, 32.17, 30.73, 17.03.

To the suspension of *N*-methoxy-*N*-methyl-5-oxopentanamide (11.2 g, 70 mmol) and dimethyl (1-diazo-2-oxopropyl)phosphonate (20.16 g, 105 mmol) in MeOH (200 mL) was added K<sub>2</sub>CO<sub>3</sub> (19.3 g, 140 mmol). The mixture was stirred at rt for 24 h and the resulting mixture was concentrated under reduced pressure. Then, the water (50 mL) was added and aqueous phase was extracted with EA (4×50 mL). The organic layer was dried and filtered and concentrated. The crude product was purified on SiO<sub>2</sub> to give the compound *N*-methoxy-*N*-methylhex-5-ynamide (7.16 g, 66%). The <sup>1</sup>H and <sup>13</sup>C NMR spectral data for the rest of *N*-methoxy-*N*-methylhex-5-ynamide showed good agreement with literature data [5]

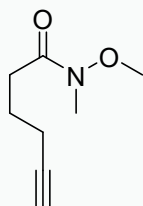

**14**

**Physical state:** colorless oil

**Rf** = 0.6 (PE/EtOAc = 1:1; KMnO<sub>4</sub>) 7.16 g, 66% yield.

<sup>1</sup>H NMR (400 MHz, CDCl<sub>3</sub>) δ 3.70 (s, 3H), 3.18 (s, 3H), 2.58 (t, *J* = 7.4 Hz, 2H), 2.29 (td, *J* = 6.9, 2.6 Hz, 2H), 1.98 (t, *J* = 2.6 Hz, 1H), 1.86 (p, *J* = 7.1 Hz, 2H).

<sup>13</sup>C NMR (100 MHz, CDCl<sub>3</sub>) δ 173.81, 83.77, 68.88, 61.20, 32.15, 30.39, 23.16, 17.93.[5]

HBr gas was prepared by adding the PBr<sub>3</sub> (3.8 mL, 40 mmol) to water (1.5 mL). The HBr was led into the solution of Et<sub>4</sub>NBr (16.8 g, 12 mmol) in DCM (40 mL). *N*-methoxy-*N*-methylhex-5-ynamide (6.2 g, 40 mmol) was added to the above solution and the reaction was heated at 40 °C for 5 h. After the reaction was completed (monitored by TLC), water (50 mL) was added into reaction mixture and aqueous phase was extracted with EA (3×15 mL), dried over Na<sub>2</sub>SO<sub>4</sub>, filtered and concentrated. The crude product was purified on SiO<sub>2</sub> to give the 5-bromo-*N*-methoxy-*N*-methylhex-5-enamide.

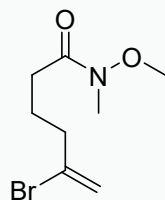

**15**

**Physical state:** colorless oil

**Rf** = 0.6 (PE/EtOAc = 1:1; KMnO<sub>4</sub>) 7.4 g, 76% yield.

<sup>1</sup>H NMR (400 MHz, CDCl<sub>3</sub>) δ 5.60 (d, *J* = 1.5 Hz, 1H), 5.42 (d, *J* = 1.7 Hz, 1H), 3.68 (s, 3H), 3.18 (s, 3H), 2.57 – 2.47 (m, 2H), 2.44 (t, *J* = 7.3 Hz, 2H), 1.91 (p, *J* = 7.3 Hz, 2H).

<sup>13</sup>C NMR (100 MHz, CDCl<sub>3</sub>) δ 173.96, 133.85, 117.15, 61.25, 52.23, 40.69, 30.19, 22.64.

**HRMS(ESI<sup>+</sup>)** m/z Calculated for C<sub>8</sub>H<sub>15</sub>BrNO<sub>2</sub> [M+H]<sup>+</sup>: 236.0286, found:236.0286

**IR (thin film) v<sub>max</sub> (cm<sup>-1</sup>):** 2937, 1659, 1415, 1385, 1177, 993, 889.

To the solution of dimethyl methylphosphonate (7.45 g, 60 mmol) in dry THF (150 mL) at -78°C was added LDA (60 mmol) under Ar. The reaction was stirred at -78°C for 30 min. Then 5-bromo-N-methoxy-N-methylhex-5-enamide (7.05 g, 30 mmol) was added to the above solution. The mixture was stirred at -78°C for another 2 h and quenched with saturated NH<sub>4</sub>Cl (30 mL). The organic layer was separated and aqueous phase was extracted with EA and dried over Na<sub>2</sub>SO<sub>4</sub>. The combined organic layers were evaporated and the residue was purified via column chromatography to give dimethyl (6-bromo-2-oxohept-6-en-1-yl)phosphonate.

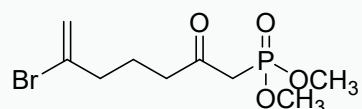

**16**

**Physical state:** colorless oil

**Rf** = 0.3 (PE/EtOAc = 2:1; anisaldehyde) 6.95 g, 78% yield.

**<sup>1</sup>H NMR** (400 MHz, CDCl<sub>3</sub>) δ 5.58 (d, *J* = 1.5 Hz, 1H), 5.42 (d, *J* = 1.6 Hz, 1H), 3.79 (s, 3H), 3.77 (s, 3H), 3.11 (s, 1H), 3.05 (s, 1H), 2.64 (t, *J* = 7.1 Hz, 2H), 2.44 (td, *J* = 7.2, 1.1 Hz, 2H), 1.85 (p, *J* = 7.1 Hz, 2H).

**<sup>13</sup>C NMR** (100 MHz, CDCl<sub>3</sub>) δ 201.24, 201.17, 133.49, 117.42, 53.11, 53.04, 42.23, 42.03, 40.76, 40.12, 21.45.

**HRMS(ESI<sup>+</sup>)** m/z Calculated for C<sub>9</sub>H<sub>17</sub>BrO<sub>4</sub>P [M+H]<sup>+</sup>: 299.0048, found:299.0049

**IR (thin film) v<sub>max</sub> (cm<sup>-1</sup>):** 2939, 1712, 1250, 1022, 885, 808.

To the solution of the phosphonate (594 mg, 2.0 mmol) in the 10 mL dry THF was added NaH (96 mg, 2.4 mmol) under Ar at rt. The reaction was stirred at rt for 30 min. Then aldehyde (1.2 eq.) was added. The mixture was stirred at 30 °C for another 24 h and quenched with saturated NH<sub>4</sub>Cl (10 mL). The organic layer was separated and water layer was extracted with EA and dried over Na<sub>2</sub>SO<sub>4</sub>. The combined organic layers were evaporated and the residue was purified via column chromatography to give desired product (377 mg, 82%)

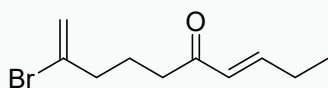

**17**

**Physical state:** colorless oil

**Rf** = 0.3 (PE/EtOAc = 2:1; anisaldehyde) 377 mg, 82% yield.



$^1\text{H NMR}$  (400 MHz,  $\text{CDCl}_3$ )  $\delta$  6.89 (dt,  $J = 15.9, 6.4$  Hz, 1H), 6.09 (dt,  $J = 15.9, 1.7$  Hz, 1H), 5.58 (d,  $J = 1.4$  Hz, 1H), 5.43 (d,  $J = 1.6$  Hz, 1H), 2.56 (t,  $J = 7.3$  Hz, 2H), 2.47 (td,  $J = 7.2, 1.2$  Hz, 2H), 2.29 – 2.18 (m, 2H), 1.89 (p,  $J = 7.2$  Hz, 2H), 1.08 (t,  $J = 7.4$  Hz, 3H).

$^{13}\text{C NMR}$  (101 MHz,  $\text{CDCl}_3$ )  $\delta$  199.98, 148.93, 133.83, 129.33, 117.27, 40.53, 38.06, 25.54, 22.16, 12.25.

**HRMS(ESI<sup>+</sup>)**  $m/z$  Calculated for  $\text{C}_{10}\text{H}_{16}\text{BrO}$   $[\text{M}+\text{H}]^+$ : 231.0385, found:231.0389

**IR (thin film)**  $\nu_{\text{max}}$  ( $\text{cm}^{-1}$ ): 2925, 1461, 1250, 835, 774.

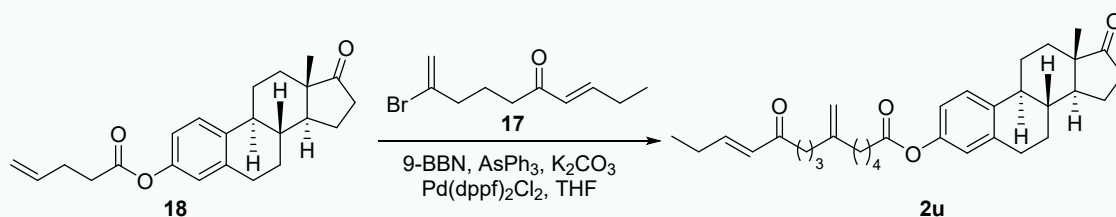

Compound **18** was synthesized according to known reports.<sup>[6]</sup> To the solution of the compound **18** (176 mg, 0.5 mmol) in dry THF (5 mL) was added 9-BBN (1.2 mL, 0.6 mmol, 0.5 M) under Ar at rt. The reaction was stirred at 40 °C for 4 h. Then  $\text{Pd}(\text{dppf})_2\text{Cl}_2$  (14.7 mg, 5 mol%),  $\text{K}_2\text{CO}_3$  (109 mg, 0.8 mmol),  $\text{AsPh}_3$  (12.2 mg, 10 mol%) was added sequentially to solution of compound **17** (140.8 mg, 0.4 mmol) in 5 mL dry THF under Ar. Finally, the pre-synthesized boron reagent and water (0.1 mL) was added to the above solution. The reaction was stirred at 60 °C for 12 h. The reaction was quenched with water and extracted with EA. The organic layer was dried over  $\text{Na}_2\text{SO}_4$  and filtered and concentrated. The residue was purified via column chromatography to give desired product.

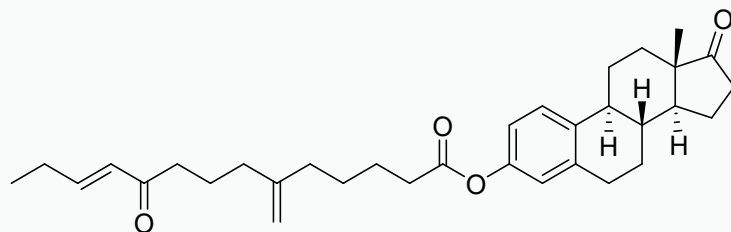

**2u**

**Physical state:** white solid, m.p 193.4 – 194.9 °C

**Rf** = 0.4 (PE/EtOAc = 5:1; UV) 81.2 mg, 50% yield.

$^1\text{H NMR}$  (400 MHz,  $\text{CDCl}_3$ )  $\delta$  7.24 (s, 1H), 6.89 – 6.75 (m, 3H), 6.06 (dt,  $J = 15.9, 1.7$  Hz, 1H), 4.74 (s, 1H), 4.73 (s, 1H), 3.70 (t,  $J = 8.5$  Hz, 1H), 2.90 – 2.75 (m, 2H), 2.52 (td,  $J = 7.4, 3.3$  Hz, 4H), 2.38 – 2.15 (m, 4H), 2.12 – 1.98 (m, 4H), 1.96 – 1.89 (m, 1H), 1.85 (ddt,  $J = 11.4, 5.8, 2.8$  Hz, 1H), 1.78 – 1.62 (m, 4H), 1.60 – 1.38 (m, 6H), 1.37 – 1.24 (m, 3H), 1.22 – 1.09 (m, 1H), 1.05 (t,  $J = 7.4$  Hz, 3H), 0.75 (s, 3H).

$^{13}\text{C}$  NMR (100 MHz,  $\text{CDCl}_3$ )  $\delta$  200.72, 172.49, 148.66, 148.45, 148.42, 138.22, 137.90, 129.45, 126.37, 121.50, 118.58, 109.85, 81.87, 50.09, 44.15, 43.22, 39.39, 38.50, 36.69, 35.44, 35.33, 34.27, 30.58, 29.54, 27.10, 27.06, 26.17, 25.53, 24.66, 23.14, 22.07, 12.28, 11.06.

HRMS(ESI<sup>+</sup>)  $m/z$  Calculated for  $\text{C}_{33}\text{H}_{45}\text{O}_4[\text{M}+\text{H}]^+$ : 505.3312, found: 505.3319

IR (thin film)  $\nu_{\text{max}}$  ( $\text{cm}^{-1}$ ): 2927, 2868, 1755, 1133, 1055.

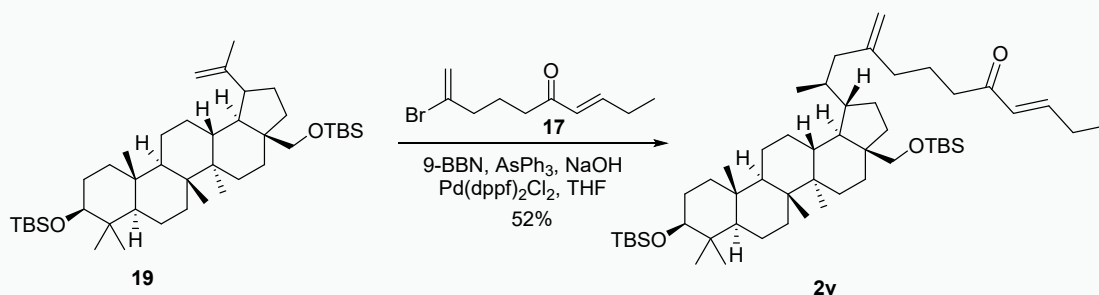

Compound **19** was synthesized according to the known procedure.<sup>[7]</sup> To the solution of the compound **19** (335 mg, 0.5 mmol) in the 5 mL dry THF was added 9-BBN (1.2 mL, 0.6 mmol, 0.5 M) under Ar at rt. The reaction was stirred at 40 °C for 4 h. Then Pd(dppf)<sub>2</sub>Cl<sub>2</sub> (14.7 mg, 5%), NaOH (32 mg, 0.8 mmol), AsPh<sub>3</sub>(12.2 mg, 10%) was added sequentially to the solution of compound **17** (140.8 mg, 0.4 mmol) in 5 mL dry THF under Ar. Finally, the pre-synthesized boron reagent and water (0.1 mL) was added to above solution. The reaction was stirred at 60 °C for 12 h. The reaction was quenched with water and extracted with EA. The organic layer was dried over Na<sub>2</sub>SO<sub>4</sub> and filtered and concentrated. The residue was purified via column chromatography to give desired product.

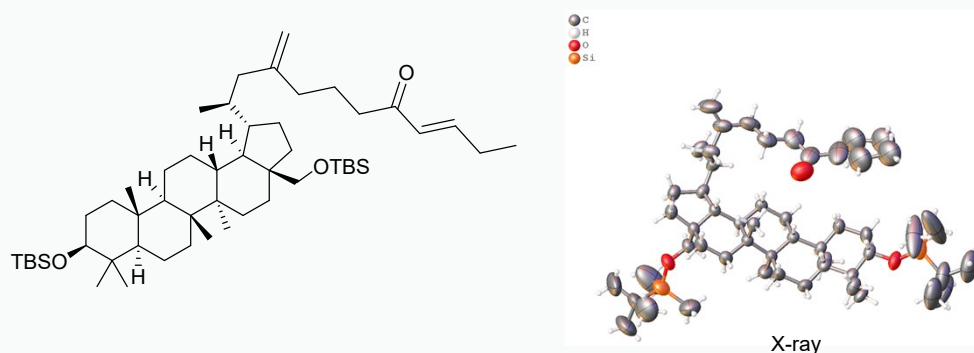

**2v**

**Physical state:** white solid, m.p. 182.2 – 182.9 °C

**R<sub>f</sub>** = 0.5 (PE/EtOAc = 5:1; UV) 170.9 mg, 52% yield.

$^1\text{H}$  NMR (400 MHz,  $\text{CDCl}_3$ )  $\delta$  6.88 (dt,  $J$  = 15.9, 6.4 Hz, 1H), 6.10 (dt,  $J$  = 15.8, 1.7 Hz, 1H), 4.74 (s, 2H), 3.66 (d,  $J$  = 9.7 Hz, 1H), 3.30 – 3.09 (m, 2H), 2.54 (ddd,  $J$  = 8.0, 6.9, 1.4 Hz, 2H), 2.31 – 2.19 (m, 2H), 2.17 (d,  $J$  = 13.1 Hz, 1H), 2.01 (t,  $J$  = 7.4 Hz, 2H), 1.96 – 1.58 (m, 12H), 1.55 (s, 6H), 1.55 – 1.41 (m, 4H), 1.44 – 1.25 (m, 6H), 1.09 (t,  $J$  = 7.4 Hz, 3H), 1.02 (s,

3H), 0.93 (s, 3H), 0.89 (d,  $J = 1.3$  Hz, 21H), 0.83 (s, 3H), 0.79 (d,  $J = 6.5$  Hz, 3H), 0.73 (s, 3H), 0.68 (d,  $J = 10.6$  Hz, 1H), 0.03 (s, 12H).

$^{13}\text{C}$  NMR (100 MHz,  $\text{CDCl}_3$ )  $\delta$  200.64, 148.48, 148.24, 129.51, 111.08, 79.46, 60.34, 55.35, 50.19, 48.13, 47.52, 44.95, 42.86, 41.02, 39.44, 39.38, 38.73, 37.05, 36.96, 35.99, 35.10, 34.44, 34.38, 33.15, 29.56, 28.42, 27.83, 27.30, 26.93, 25.98, 25.94, 25.56, 22.50, 22.16, 20.99, 19.97, 18.50, 18.33, 18.14, 16.14, 15.91, 15.89, 14.65, 12.33, 0.01, -3.76, -4.90, -5.44.

**HRMS(ESI<sup>+</sup>)**  $m/z$  Calculated for  $\text{C}_{52}\text{H}_{95}\text{O}_3\text{Si}_2[\text{M}+\text{H}]^+$ : 823.6814, found: 823.6819

**IR (thin film)  $\nu_{\text{max}}$  ( $\text{cm}^{-1}$ ):** 2918, 2849, 2360, 1630, 1020.

### 3.2. General procedures for the radical cascade reaction

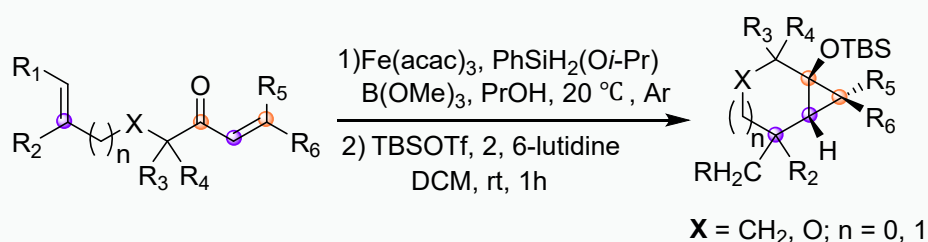

$\text{Fe}(\text{acac})_3$  (0.2 eq.) was added to the solution of  $\alpha, \beta$ -unsaturated compound (0.1 mmol) in 1.5 mL *n*-PrOH at 20 °C under Ar atmosphere. Then  $\text{PhSiH}_2(\text{O}i\text{-Pr})$  (2.5 eq.) and  $\text{B}(\text{OMe})_3$  (2.0 eq) was added to the above solution and the reaction was stirred at 20 °C until the starting material was consumed. Then, the reaction mixture was direct purified by neutral alumina column chromatography. After that 2,6-lutidine (6 eq) was added to the received cyclopropanols in dry DCM (5 mL) and the solution was stirred at 0 °C for 30 min, then slow addition of TBSOTf (3 eq.). The reaction mixture was stirred at 0 °C for another 1h. Then, the reaction was quenched with saturated  $\text{NaHCO}_3$  (5 mL) and extracted with EA, the organic layer was dried over  $\text{Na}_2\text{SO}_4$ , filtrated and concentrated under reduced pressure. The crude product was purified on  $\text{SiO}_2$ .<sup>[8]</sup>

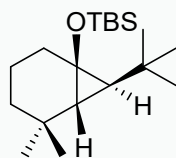

#### 3a

**Physical state:** colorless oil

**R<sub>f</sub>** = 0.9 (PE; anisaldehyde) 28.8 mg, 93%

**<sup>1</sup>H NMR** (400 MHz, Acetone-*d*<sub>6</sub>) δ 1.94 – 1.80 (m, 2H), 1.52 – 1.45 (m, 1H), 1.23 – 1.18 (m, 1H), 1.17 (s, 3H), 1.12 – 1.00 (m, 2H), 0.99 (s, 9H), 0.92 (d, *J* = 1.6 Hz, 1H), 0.89 (s, 9H), 0.86 (s, 3H), 0.24 (d, *J* = 7.4 Hz, 1H), 0.22 (s, 3H), 0.11 (s, 3H).

**<sup>13</sup>C NMR** (100 MHz, Acetone-*d*<sub>6</sub>) δ 60.50, 36.98, 35.59, 34.02, 33.60, 30.53, 30.10, 29.42, 28.10, 25.39, 18.56, 17.52, -3.73, -3.81.

**HRMS(APCI-TOF)** *m/z* Calculated for C<sub>19</sub>H<sub>39</sub>OSi[M+H]<sup>+</sup>: 311.2765, found: 311.2761.

**IR (thin film) ν<sub>max</sub> (cm<sup>-1</sup>):** 2954, 2922, 2360, 2337, 1462.

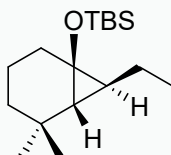

### 3b

**Physical state:** colorless oil

**R<sub>f</sub>** = 0.9 (PE; anisaldehyde) 20.6 mg, 73%

**<sup>1</sup>H NMR** (400 MHz, Acetone-*d*<sub>6</sub>) δ 1.94 – 1.82 (m, 2H), 1.50 – 1.40 (m, 2H), 1.32 (dd, *J* = 14.4, 7.0 Hz, 1H), 1.23 – 1.14 (m, 1H), 1.14 (s, 3H), 1.03 (ddd, *J* = 15.9, 8.6, 3.1 Hz, 2H), 0.96 (t, *J* = 7.4 Hz, 3H), 0.87 (s, 9H), 0.86 (s, 3H), 0.47 (d, *J* = 6.1 Hz, 1H), 0.40 – 0.34 (m, 1H), 0.17 (s, 3H), 0.11 (s, 3H).

**<sup>13</sup>C NMR** (100 MHz, Acetone-*d*<sub>6</sub>) δ 60.34, 38.04, 36.17, 33.06, 31.06, 28.05, 27.73, 25.25, 25.22, 21.61, 18.49, 17.60, 13.49, -3.87, -3.97.

**HRMS(APCI-TOF)** *m/z* Calculated for C<sub>17</sub>H<sub>35</sub>OSi[M+H]<sup>+</sup>: 283.2452, found: 283.2457.

**IR (thin film) ν<sub>max</sub> (cm<sup>-1</sup>):** 2925, 2853, 1462, 1250, 1200, 833.

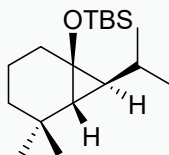

### 3c

**Physical state:** colorless oil

**R<sub>f</sub>** = 0.9 (PE; anisaldehyde) 25.5 mg, 86%

**<sup>1</sup>H NMR** (400 MHz, Acetone-*d*<sub>6</sub>) δ 1.94 – 1.82 (m, 2H), 1.52 – 1.43 (m, 1H), 1.34 (ddd, *J* = 13.4, 9.7, 6.7 Hz, 1H), 1.22 – 1.16 (m, 1H), 1.15 (s, 3H), 1.10 – 1.04 (m, 2H), 0.98 (t, *J* = 6.5 Hz, 6H), 0.87 (s, 9H), 0.86 (s, 3H), 0.52 (d, *J* = 6.0 Hz, 1H), 0.18 (s, 3H), 0.14 (dd, *J* = 9.8, 6.1 Hz, 1H), 0.11 (s, 3H).

**<sup>13</sup>C NMR** (100 MHz, Acetone-*d*<sub>6</sub>) δ 60.29, 37.76, 36.14, 34.16, 33.26, 30.97, 28.19, 25.21, 21.99, 21.91, 18.46, 17.54, -3.84, -4.04.

**HRMS(APCI-TOF)** *m/z* Calculated for C<sub>18</sub>H<sub>37</sub>OSi[M+H]<sup>+</sup>: 297.2608, found: 297.2605.

**IR (thin film) ν<sub>max</sub> (cm<sup>-1</sup>):** 2954, 2928, 2361, 1464, 1253, 1200.

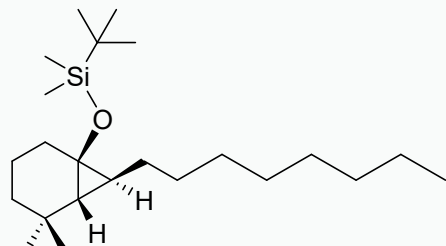

**3d**

**Physical state:** colorless oil

**Rf** = 0.9 (PE; anisaldehyde) 30.7 mg, 84%

**<sup>1</sup>H NMR** (400 MHz, Acetone-*d*<sub>6</sub>) δ 1.94 – 1.82 (m, 2H), 1.51 – 1.44 (m, 1H), 1.39 – 1.28 (m, 14H), 1.22 – 1.16 (m, 1H), 1.14 (s, 3H), 1.10 – 0.97 (m, 3H), 0.93 – 0.89 (m, 2H), 0.88 (s, 9H), 0.86 (s, 3H), 0.48 (d, *J* = 6.1 Hz, 1H), 0.41 – 0.39 (m, 1H), 0.18 (s, 3H), 0.12 (s, 3H).

**<sup>13</sup>C NMR** (100 MHz, Acetone-*d*<sub>6</sub>) δ 60.25, 38.01, 36.21, 33.04, 31.77, 31.10, 29.64, 29.55, 29.24, 28.81, 28.47, 28.02, 25.94, 25.28, 22.44, 18.49, 17.61, 13.45, -3.86, -3.93.

**HRMS(APCI-TOF)** *m/z* Calculated for C<sub>23</sub>H<sub>47</sub>OSi[M+H]<sup>+</sup>: 367.3391, found: 367.3390.

**IR (thin film)** *v*<sub>max</sub> (cm<sup>-1</sup>): 2925, 2853, 1462, 1250, 1200, 859.

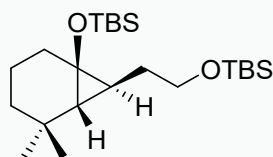

**3e**

**Physical state:** colorless oil

**Rf** = 0.9 (PE; anisaldehyde) 33.8 mg, 82%

**<sup>1</sup>H NMR** (400 MHz, Acetone-*d*<sub>6</sub>) δ 3.72 – 3.67 (m, 2H), 1.97 – 1.81 (m, 2H), 1.76 – 1.60 (m, 1H), 1.59 – 1.40 (m, 3H), 1.15 (s, 3H), 1.11 – 0.99 (m, 2H), 0.90 (s, 9H), 0.88 (d, *J* = 3.4 Hz, 12H), 0.62 – 0.47 (m, 2H), 0.18 (s, 3H), 0.12 (s, 3H), 0.06 (d, *J* = 2.1 Hz, 6H).

**<sup>13</sup>C NMR** (100 MHz, Acetone-*d*<sub>6</sub>) δ 62.94, 59.97, 37.90, 36.15, 32.89, 32.11, 31.03, 27.99, 25.42, 25.29, 22.35, 18.46, 17.92, 17.60, -3.89, -3.94, -5.94, -5.97.

**HRMS(APCI-TOF)** *m/z* Calculated for C<sub>23</sub>H<sub>49</sub>O<sub>2</sub>Si<sub>2</sub>[M+H]<sup>+</sup>: 413.3266, found: 413.3269

**IR (thin film)** *v*<sub>max</sub> (cm<sup>-1</sup>): 2954, 2929, 1462, 1252, 1097, 834.

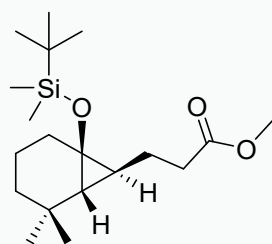

### 3f

**Physical state:** colorless oil

**Rf** = 0.8 (PE; anisaldehyde) 15 mg, 44%

**<sup>1</sup>H NMR** (400 MHz, Acetone-*d*<sub>6</sub>) δ 3.62 (s, 3H), 2.39 (td, *J* = 7.5, 5.4 Hz, 2H), 1.96 – 1.82 (m, 2H), 1.68 (q, *J* = 7.3 Hz, 2H), 1.56 – 1.42 (m, 1H), 1.27 – 1.16 (m, 1H), 1.15 (s, 3H), 1.13 – 0.95 (m, 2H), 0.89 (s, 9H), 0.86 (s, 3H), 0.56 (d, *J* = 6.0 Hz, 1H), 0.53 – 0.46 (m, 1H), 0.19 (s, 3H), 0.14 (s, 3H).

**<sup>13</sup>C NMR** (100 MHz, Acetone-*d*<sub>6</sub>) δ 173.25, 60.22, 50.49, 37.98, 36.10, 33.55, 32.79, 30.98, 27.89, 25.25, 24.96, 24.06, 18.41, 17.58, -3.88, -4.00.

**HRMS(APCI-TOF)** *m/z* Calculated for C<sub>19</sub>H<sub>37</sub>O<sub>3</sub>Si[M+H]<sup>+</sup>: 341.2506, found: 341.2509

**IR (thin film)**  $\nu_{\max}$  (cm<sup>-1</sup>): 2952, 2930, 2355, 1744, 1251, 836.

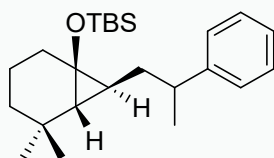

### 3g

**Physical state:** colorless oil

**Rf** = 0.9 (PE; anisaldehyde) 25.3 mg, 1.5:1 dr, 68%

**<sup>1</sup>H NMR** (400 MHz, Acetone-*d*<sub>6</sub>) δ 7.45 – 7.32 (m, 0.73H), 7.32 – 7.21 (m, 3.25H), 7.19 – 7.08 (m, 1H), 2.61 (dq, *J* = 9.8, 7.2 Hz, 0.43H), 2.46 (dq, *J* = 9.5, 6.9 Hz, 0.63H), 2.03 – 1.96 (m, 0.71H), 1.95 – 1.80 (m, 1.47H), 1.55 – 1.42 (m, 1H), 1.35 (d, *J* = 7.2 Hz, 1.19H), 1.32 (d, *J* = 6.9 Hz, 1.85H), 1.30 – 1.22 (m, 1H), 1.21 (s, 1.26H), 1.20 – 1.12 (m, 1H), 1.12 – 1.03 (m, 1H), 1.01 (s, 1.84H), 0.97 (dd, *J* = 5.5, 3.4 Hz, 1H), 0.95 (s, 6.89H), 0.93 – 0.87 (m, 1H), 0.84 (s, 3.53H), 0.75 – 0.57 (m, 2H), 0.34 (s, 1.81H), 0.21 (d, *J* = 9.4 Hz, 3.57H), 0.17 (d, *J* = 9.4 Hz, 2.36H).

**<sup>13</sup>C NMR** (100 MHz, Acetone-*d*<sub>6</sub>) δ 147.74, 147.56, 128.03, 127.83, 127.14, 126.92, 125.63, 125.30, 60.97, 60.83, 40.15, 37.83, 37.64, 37.56, 36.17, 36.07, 33.91, 33.80, 33.14, 32.92, 31.02, 30.97, 28.38, 28.26, 27.60, 25.29, 25.27, 21.03, 20.76, 18.42, 17.64, 17.57, -3.92.

**HRMS(APCI-TOF)** *m/z* Calculated for C<sub>24</sub>H<sub>41</sub>OSi[M+H]<sup>+</sup>: 373.2927, found: 373.2931.

**IR (thin film)**  $\nu_{\max}$  (cm<sup>-1</sup>): 2954, 2928, 1250, 1199, 832, 773.

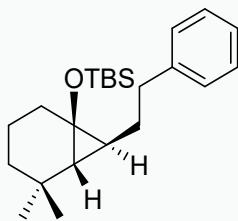

### 3h

**Physical state:** colorless oil

**Rf** = 0.9 (PE; anisaldehyde) 18.6 mg, 52%

**<sup>1</sup>H NMR** (400 MHz, Acetone-*d*<sub>6</sub>) δ 7.17 – 7.05 (m, 4H), 7.03 – 6.97 (m, 1H), 2.64 – 2.48 (m, 2H), 1.85 – 1.65 (m, 2H), 1.64 – 1.48 (m, 2H), 1.42 – 1.20 (m, 1H), 1.01 (s, 3H), 0.98 – 0.79 (m, 3H), 0.76 (s, 9H), 0.72 (s, 3H), 0.44 (d, *J* = 6.1 Hz, 1H), 0.39 – 0.29 (m, 1H), 0.06 (s, 3H), -0.00 (s, 3H).

**<sup>13</sup>C NMR** (100 MHz, Acetone-*d*<sub>6</sub>) δ 142.91, 128.28, 128.15, 125.47, 60.30, 38.14, 36.18, 35.86, 32.99, 31.07, 30.97, 28.85, 28.05, 25.53, 25.33, 18.47, 17.63, -3.87.

**HRMS(APCI-TOF)** *m/z* Calculated for C<sub>23</sub>H<sub>39</sub>O Si [M+H]<sup>+</sup>: 359.2765, found: 359.2763.

**IR (thin film) ν<sub>max</sub> (cm<sup>-1</sup>):** 2925, 2854, 1461, 1250, 835, 774.

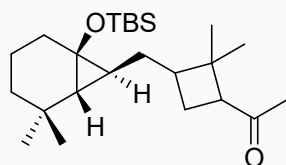

**3i**

**Physical state:** colorless oil

**Rf** = 0.8 (PE; anisaldehyde) 31.7 mg, 1.23:1 dr, 84%

**<sup>1</sup>H NMR** (400 MHz, Acetone-*d*<sub>6</sub>) δ 2.92 – 2.84 (m, 1H), 1.98 (d, *J* = 1.7 Hz, 3H), 1.94 – 1.85 (m, 3.4H), 1.79 (dt, *J* = 10.8, 7.7 Hz, 0.63H), 1.51 – 1.36 (m, 2H), 1.30 (d, *J* = 1.7 Hz, 4H), 1.26 – 1.16 (m, 1H), 1.14 (s, 3H), 1.03 (dtd, *J* = 20.9, 12.8, 2.7 Hz, 3H), 0.89 (d, *J* = 3.3 Hz, 10.47H), 0.85 (d, *J* = 4.6 Hz, 3H), 0.82 (s, 1.57H), 0.51 (d, *J* = 6.0 Hz, 0.53H), 0.44 (d, *J* = 6.1 Hz, 0.43H), 0.32 (dt, *J* = 7.0, 6.1 Hz, 1 H), 0.18 (d, *J* = 2.1 Hz, 3H), 0.12 (d, *J* = 2.1 Hz, 3H).

**<sup>13</sup>C NMR** (100 MHz, Acetone-*d*<sub>6</sub>) δ 206.20, 206.17, 60.29, 59.56, 53.72, 53.56, 42.72, 42.50, 42.03, 41.89, 37.85, 37.78, 36.22, 32.89, 32.82, 31.15, 31.13, 29.89, 29.85, 27.97, 27.91, 25.31, 23.75, 23.54, 23.45, 23.04, 18.45, 17.64, 16.73, 16.54, -3.86, -3.92.

**HRMS(APCI-TOF)** *m/z* Calculated for C<sub>24</sub>H<sub>46</sub>O<sub>2</sub>Si [M+H]<sup>+</sup>: 393.3819, found: 393.3813.

**IR (thin film) ν<sub>max</sub> (cm<sup>-1</sup>):** 2928, 2855, 1707, 1462, 1359, 1201, 835.

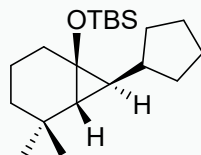

**3j**

**Physical state:** colorless oil

**Rf** = 0.9 (PE; anisaldehyde) 27 mg, 84%

**<sup>1</sup>H NMR** (400 MHz, Acetone-*d*<sub>6</sub>) δ 1.90 – 1.80 (m, 3H), 1.78– 1.73 (m, 1H), 1.65 – 1.56 (m, 2H), 1.51 – 1.45 (m, 3H), 1.36 – 1.14 (m, 3H), 1.14 (s, 3H), 1.07 – 0.95 (m, 3H), 0.87 (s, 9H), 0.86 (s, 3H), 0.57 (d, *J* = 6.0 Hz, 1H), 0.28 (dd, *J* = 9.5, 6.0 Hz, 1H), 0.18 (s, 3H), 0.11 (s, 3H).

**<sup>13</sup>C NMR** (100 MHz, Acetone-*d*<sub>6</sub>) δ 60.12, 40.41, 38.23, 36.14, 33.16, 32.43, 32.28, 31.80, 30.97, 28.23, 25.23, 25.01, 24.60, 18.50, 17.55, -3.79, -4.01.

**HRMS(APCI-TOF)** *m/z* Calculated for C<sub>20</sub>H<sub>39</sub>O<sub>5</sub>Si [M+H]<sup>+</sup>: 323.2765 found: 323.2763.

**IR (thin film) ν<sub>max</sub> (cm<sup>-1</sup>):** 2952, 2929, 1360, 1251, 1201, 884.

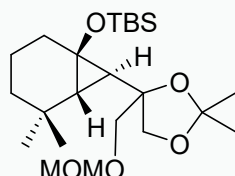

### 3k

**Physical state:** colorless oil

**R<sub>f</sub>** = 0.7 (PE; anisaldehyde) 37.2 mg, 1.9:1 dr, 87%

**<sup>1</sup>H NMR** (400 MHz, Acetone-*d*<sub>6</sub>) δ 4.65 (s, 1.30H), 4.63 (s, 0.69H), 4.15 (d, *J* = 8.3 Hz, 0.31H), 3.80 – 3.65 (m, 2H), 3.58 – 3.49 (m, 1.34H), 3.42 (d, *J* = 8.8 Hz, 0.28H), 3.32 (d, *J* = 3.0 Hz, 3H), 1.98 – 1.78 (m, 2H), 1.63 – 1.48 (m, 2H), 1.44 (d, *J* = 6.7 Hz, 0.43H), 1.34 (d, *J* = 5.7 Hz, 6H), 1.20 (s, 3H), 1.13 (d, *J* = 6.9 Hz, 1H), 1.07 – 1.01 (m, 1H), 0.94 (d, *J* = 7.3 Hz, 1H), 0.89 (d, *J* = 1.8 Hz, 9H), 0.72 (d, *J* = 6.7 Hz, 0.45H), 0.24 (s, 2.24H), 0.18 (s, 1.66H), 0.15 (d, *J* = 4.3 Hz, 3H).

**<sup>13</sup>C NMR** (100 MHz, Acetone-*d*<sub>6</sub>) δ 107.39, 96.56, 96.53, 82.44, 80.57, 72.59, 71.97, 70.72, 66.77, 59.62, 59.51, 54.25, 54.20, 36.04, 35.41, 33.69, 33.25, 32.74, 32.37, 30.97, 30.87, 30.59, 28.43, 27.21, 26.72, 26.16, 25.35, 25.30, 18.35, 17.53, -3.89.

**HRMS(APCI-TOF)** *m/z* Calculated for C<sub>23</sub>H<sub>45</sub>O<sub>5</sub>Si [M+H]<sup>+</sup>: 429.3031, found: 429.3029.

**IR (thin film) ν<sub>max</sub> (cm<sup>-1</sup>):** 2925, 1462, 1259, 1047, 799.

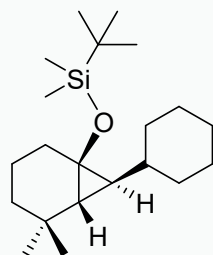

### 3l

**Physical state:** colorless oil

**R<sub>f</sub>** = 0.9 (PE; anisaldehyde) 27.9 mg, 83%

**<sup>1</sup>H NMR** (400 MHz, Acetone-*d*<sub>6</sub>) δ 1.89 (ddd, *J* = 7.0, 5.8, 3.9 Hz, 3H), 1.80 – 1.60 (m, 4H), 1.49 (ddtd, *J* = 13.2, 7.1, 5.9, 2.8 Hz, 1H), 1.23 – 1.17 (m, 3H), 1.16 (s, 3H), 1.12 – 0.96 (m,



6H), 0.90 (d,  $J = 2.8$  Hz, 1H), 0.89 (s, 9H), 0.86 (s, 1H), 0.54 (d,  $J = 6.0$  Hz, 1H), 0.18 (s, 3H), 0.13 (s, 3H).

$^{13}\text{C}$  NMR (100 MHz, Acetone- $d_6$ )  $\delta$  60.05, 38.22, 37.48, 36.17, 33.35, 33.23, 32.75, 32.33, 30.97, 28.62, 28.34, 26.56, 26.41, 26.12, 25.22, 18.49, 17.58, -3.75, -4.04.

HRMS(APCI-TOF)  $m/z$  Calculated for  $\text{C}_{21}\text{H}_{41}\text{OSi}$   $[\text{M}+\text{H}]^+$ : 337.2921, found: 337.2928.

IR (thin film)  $\nu_{\text{max}}$  ( $\text{cm}^{-1}$ ): 2924, 2852, 1462, 1250, 1065, 833.

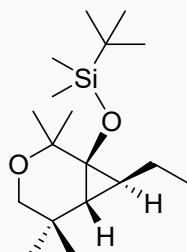

### 3m

**Physical state:** colorless oil

Rf = 0.8 (PE; anisaldehyde) 25 mg, 80%

$^1\text{H}$  NMR (400 MHz, Acetone- $d_6$ )  $\delta$  3.29 (d,  $J = 12.0$  Hz, 1H), 2.98 (d,  $J = 12.1$  Hz, 1H), 1.58 – 1.39 (m, 1H), 1.34 (s, 3H), 1.30 (dd,  $J = 5.7, 2.1$  Hz, 1H), 1.16 (s, 3H), 1.08 (s, 3H), 0.98 (t,  $J = 7.4$  Hz, 3H), 0.92 (s, 12H), 0.87 (d,  $J = 6.2$  Hz, 1H), 0.77 (dt,  $J = 8.3, 6.3$  Hz, 1H), 0.23 (s, 3H), 0.11 (s, 3H).

$^{13}\text{C}$  NMR (100 MHz, Acetone- $d_6$ )  $\delta$  71.62, 69.84, 65.22, 36.01, 28.22, 26.35, 25.92, 25.53, 25.14, 21.88, 20.41, 18.05, 13.55, -1.90, -3.91.

HRMS(APCI-TOF)  $m/z$  Calculated for  $\text{C}_{18}\text{H}_{37}\text{O}_2\text{Si}$   $[\text{M}+\text{H}]^+$ : 313.2557 found: 313.2557.

IR (thin film)  $\nu_{\text{max}}$  ( $\text{cm}^{-1}$ ): 2925, 2854, 1250, 1001, 832.

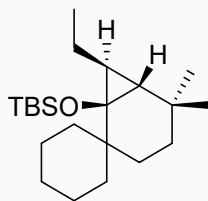

### 3n

**Physical state:** colorless oil

Rf = 0.9 (PE; anisaldehyde) 21.7 mg, 62%

$^1\text{H}$  NMR (400 MHz, Acetone- $d_6$ )  $\delta$  1.84 – 1.68 (m, 4H), 1.63 – 1.50 (m, 5H), 1.47 – 1.36 (m, 4H), 1.27 – 1.17 (m, 3H), 1.15 (s, 3H), 0.95 (m, 12H), 0.85 (s, 3H), 0.73 (d,  $J = 6.1$  Hz, 1H), 0.52 (dt,  $J = 8.2, 6.1$  Hz, 1H), 0.19 (s, 3H), 0.08 (s, 3H).

$^{13}\text{C}$  NMR (100 MHz, Acetone- $d_6$ )  $\delta$  68.39, 37.63, 35.73, 34.66, 33.52, 32.48, 29.78, 28.10, 27.40, 26.42, 25.84, 24.63, 24.46, 21.63, 20.84, 18.42, 13.74, -1.55, -3.92.

HRMS(APCI-TOF)  $m/z$  Calculated for  $\text{C}_{22}\text{H}_{43}\text{OSi}$   $[\text{M}+\text{H}]^+$ : 351.3078, found: 351.3074.

**IR (thin film)  $\nu_{\max}$  ( $\text{cm}^{-1}$ ):** 2925, 2855, 1461, 1250, 1197, 875.

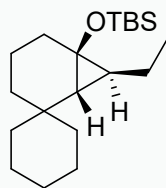

### 3o

**Physical state:** colorless oil

**Rf** = 0.9 (PE; anisaldehyde) 20.9 mg, 65%

**$^1\text{H}$  NMR** (400 MHz, Acetone- $d_6$ )  $\delta$  2.01 – 1.93 (m, 1H), 1.90 – 1.80 (m, 1H), 1.65 – 1.39 (m, 12H), 1.18 – 1.02 (m, 3H), 1.03 – 0.94 (m, 4H), 0.89 (s, 9H), 0.67 (d,  $J$  = 6.1 Hz, 1H), 0.40 (dt,  $J$  = 7.5, 6.2 Hz, 1H), 0.18 (s, 3H), 0.13 (s, 3H).

**$^{13}\text{C}$  NMR** (100 MHz, Acetone- $d_6$ )  $\delta$  60.22, 39.78, 36.54, 33.50, 31.59, 26.29, 25.24, 22.06, 21.96, 17.73, 17.60, 13.70, -3.81, -4.04.

**HRMS(APCI-TOF)**  $m/z$  Calculated for  $\text{C}_{20}\text{H}_{39}\text{OSi}[\text{M}+\text{H}]^+$ : 323.2765, found: 323.2769

**IR (thin film)  $\nu_{\max}$  ( $\text{cm}^{-1}$ ):** 2928, 2855, 1250, 1197, 879.

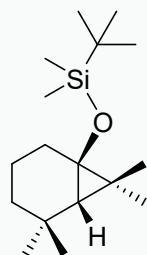

### 3p

**Physical state:** colorless oil

**Rf** = 0.9 (PE; anisaldehyde) 19.7 mg, 70%

**$^1\text{H}$  NMR** (400 MHz, Acetone- $d_6$ )  $\delta$  1.98 – 1.74 (m, 2H), 1.58 (ddq,  $J$  = 16.7, 9.7, 3.5 Hz, 1H), 1.49 – 1.38 (m, 1H), 1.19 (dt,  $J$  = 13.7, 3.7 Hz, 1H), 1.12 (s, 3H), 1.11 (s, 3H), 1.10 (s, 3H), 1.08 (d,  $J$  = 3.7 Hz, 1H), 0.97 (s, 3H), 0.89 (s, 9H), 0.46 (s, 1H), 0.19 (s, 3H), 0.13 (s, 3H).;

**$^{13}\text{C}$  NMR** (100 MHz, Acetone- $d_6$ )  $\delta$  61.46, 39.22, 35.43, 31.98, 28.41, 25.36, 24.13, 24.05, 19.45, 17.74, 17.58, -3.87.

**HRMS(APCI-TOF)**  $m/z$  Calculated for  $\text{C}_{17}\text{H}_{35}\text{OSi}[\text{M}+\text{H}]^+$ : 283.2452, found: 283.2459.

**IR (thin film)  $\nu_{\max}$  ( $\text{cm}^{-1}$ ):** 2952, 2923, 2364, 1457, 1376.

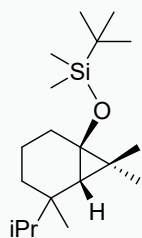

### 3q

**Physical state:** colorless oil

**Rf** = 0.9 (PE; anisaldehyde) 21.1 mg, 1.5:1 dr, 68%

**<sup>1</sup>H NMR** (400 MHz, Acetone-*d*<sub>6</sub>) δ 1.97 – 1.86 (m, 1.8H), 1.84 – 1.71 (m, 1.2H), 1.61 – 1.30 (m, 4H), 1.18 – 1.12 (m, 4H), 1.07 (s, 1.8H), 0.95 (s, 3H), 0.94 – 0.91 (m, 2H), 0.88 (d, *J* = 1.6 Hz, 9H), 0.86 (d, *J* = 6.9 Hz, 1H), 0.79 (d, *J* = 6.9 Hz, 2H), 0.76 (s, 1.2H), 0.71 (s, 0.4H), 0.45 (s, 0.6H), 0.18 (s, 1.8H), 0.14 (s, 1.16H), 0.12 (d, *J* = 1.8 Hz, 3H).

**<sup>13</sup>C NMR** (100 MHz, Acetone-*d*<sub>6</sub>) δ 61.57, 38.14, 37.46, 36.27, 36.12, 34.77, 34.63, 34.40, 31.32, 28.49, 25.40, 25.30, 25.22, 25.17, 25.15, 24.34, 24.10, 23.73, 21.07, 19.82, 19.32, 19.04, 18.17, 17.81, 17.79, 17.68, 17.64, 16.98, 16.75, 16.02, -3.78, -3.83, -3.86.

**HRMS(APCI-TOF)** *m/z* Calculated for C<sub>19</sub>H<sub>39</sub>OSi[M+H]<sup>+</sup>: 311.2765, found: 311.2765.

**IR (thin film)**  $\nu_{\max}$  (cm<sup>-1</sup>): 2928, 2361, 1464, 1253, 884, 835.

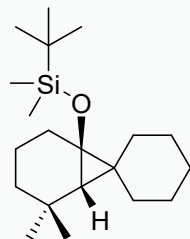

### 3r

**Physical state:** colorless oil

**Rf** = 0.9 (PE; anisaldehyde) 26.4 mg, 82%

**<sup>1</sup>H NMR** (400 MHz, Acetone-*d*<sub>6</sub>) δ 1.99 – 1.89 (m, 1H), 1.81 (ddd, *J* = 15.2, 13.3, 5.1 Hz, 1H), 1.68 – 1.42 (m, 10H), 1.36 – 1.17 (m, 3H), 1.12 (s, 3H), 1.04 (td, *J* = 13.9, 3.4 Hz, 1H), 0.96 (s, 3H), 0.89 (s, 9H), 0.42 (s, 1H), 0.21 (s, 3H), 0.12 (s, 3H).

**<sup>13</sup>C NMR** (100 MHz, Acetone-*d*<sub>6</sub>) δ 61.90, 40.48, 36.21, 34.93, 31.99, 30.69, 28.80, 28.29, 26.37, 26.20, 25.47, 25.28, 19.59, 17.64, -3.75, -3.93.

**HRMS(APCI-TOF)** *m/z* Calculated for C<sub>20</sub>H<sub>39</sub>OSi [M+H]<sup>+</sup>: 323.2765, found: 323.2757.

**IR (thin film)**  $\nu_{\max}$  (cm<sup>-1</sup>): 2925, 2854, 1250, 1001, 832.

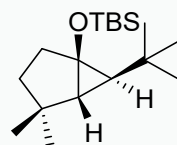

### 3s

**Physical state:** colorless oil

**Rf** = 0.9 (PE; anisaldehyde) 19.8 mg, 67%

**<sup>1</sup>H NMR** (400 MHz, Acetone-*d*<sub>6</sub>) δ 2.13 (ddd, *J* = 12.2, 11.2, 8.7 Hz, 1H), 1.89 (ddd, *J* = 12.2, 8.2, 0.8 Hz, 1H), 1.25 (ddt, *J* = 13.3, 8.7, 1.1 Hz, 2H), 1.12 (s, 3H), 1.10 (d, *J* = 4.6 Hz, 1H), 1.01 (s, 9H), 0.91 (s, 9H), 0.90 (s, 3H), 0.44 (d, *J* = 4.6 Hz, 1H), 0.22 (s, 3H), 0.15 (s, 3H).; **<sup>13</sup>C NMR** (100 MHz, Acetone-*d*<sub>6</sub>) δ 68.88, 38.38, 36.71, 35.84, 34.45, 34.09, 29.43, 28.16, 25.58, 25.54, 17.73, -2.90, -3.83.

**HRMS(APCI-TOF)** *m/z* Calculated for C<sub>18</sub>H<sub>37</sub>OSi[M+H]<sup>+</sup>: 297.2608 found:297.2601

**IR (thin film)** *v*<sub>max</sub> (cm<sup>-1</sup>): 2956, 2922, 2360, 2327, 1460.

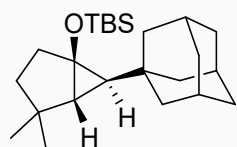

### 3t

**Physical state:** colorless oil

**Rf** = 0.9 (PE; anisaldehyde) 17.2 mg, 46%

**<sup>1</sup>H NMR** (400 MHz, Acetone-*d*<sub>6</sub>) δ 2.27 – 2.08 (m, 1H), 1.95 – 1.89 (m, 3H), 1.87 (ddd, *J* = 12.2, 8.3, 0.8 Hz, 1H), 1.80 – 1.73 (m, 3H), 1.69 (s, 5H), 1.63 (d, *J* = 12.0 Hz, 3H), 1.27 – 1.19 (m, 1H), 1.16 (dd, *J* = 4.7, 1.0 Hz, 1H), 1.14 – 1.06 (s, 3H), 0.99 – 0.94 (m, 1H), 0.92 (s, 9H), 0.90 (d, *J* = 3.7 Hz, 1H), 0.87 (s, 3H), 0.22 (d, *J* = 3.0 Hz, 4H), 0.14 (s, 3H).

**<sup>13</sup>C NMR** (100 MHz, Acetone-*d*<sub>6</sub>) δ 68.76, 42.20, 38.33, 37.03, 35.86, 35.26, 35.05, 34.63, 31.83, 28.87, 28.19, 25.70, 25.61, 17.81, -2.84, -3.81.

**HRMS(APCI-TOF)** *m/z* Calculated for C<sub>24</sub>H<sub>43</sub>OSi [M+H]<sup>+</sup>: 375.3078 found:375.3083

**IR (thin film)** *v*<sub>max</sub> (cm<sup>-1</sup>): 2955, 2354, 1545, 1118.

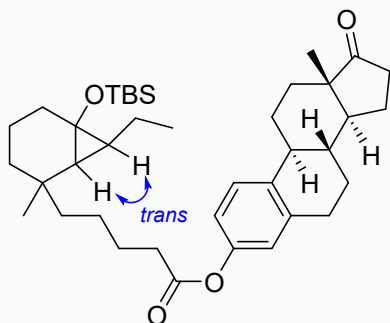

### 3u

**Physical state:** white solid, m.p 284.2 – 284.9 °C

**Rf** = 0.7 (PE; anisaldehyde) 29.1 mg, 1.5:1 dr, 47%

**<sup>1</sup>H NMR** (400 MHz, Acetone-*d*<sub>6</sub>) δ 7.30 (d, *J* = 8.5 Hz, 1H), 6.98 – 6.82 (m, 1H), 6.78 (d, *J* = 2.4 Hz, 1H), 3.74 (dd, *J* = 8.7, 7.7 Hz, 1H), 2.85 (dd, *J* = 9.4, 6.0 Hz, 2H), 2.64 – 2.50 (m,

2H), 2.35 (dt,  $J = 13.3, 3.7$  Hz, 1H), 2.22 (td,  $J = 10.9, 10.4, 4.0$  Hz, 1H), 2.03 – 1.94 (m, 1H), 1.94 – 1.86 (m, 3H), 1.77 – 1.64 (m, 3H), 1.56 – 1.43 (m, 6H), 1.42 – 1.29 (m, 4H), 1.28 – 1.17 (m, 2H), 1.10 – 1.01 (m, 1H), 0.97 (t,  $J = 7.4$  Hz, 3H), 0.92 (s, 9H), 0.88 (d,  $J = 4.1$  Hz, 6H), 0.84 (s, 1H), 0.79 (s, 3H), 0.55 (d,  $J = 6.1$  Hz, 0.35H), 0.51 (d,  $J = 6.1$  Hz, 0.53H), 0.45 (q,  $J = 6.7$  Hz, 0.37H), 0.39 (dt,  $J = 8.0, 5.9$  Hz, 0.58H), 0.08 (s, 3H), 0.07 (s, 3H).

$^{13}\text{C}$  NMR (100 MHz, Acetone- $d_6$ )  $\delta$  171.67, 171.60, 148.89, 137.89, 137.60, 126.16, 121.56, 118.78, 81.67, 60.48, 60.11, 49.50, 44.18, 44.11, 43.45, 41.06, 38.72, 37.06, 36.91, 36.74, 35.41, 35.06, 33.88, 33.83, 33.53, 32.87, 31.59, 31.49, 30.83, 27.48, 27.43, 26.94, 26.90, 26.18, 25.77, 25.75, 25.37, 25.28, 25.26, 24.33, 23.49, 23.20, 23.00, 22.11, 21.70, 18.14, 18.12, 17.77, 17.60, 13.70, 13.52, 10.93.

HRMS(ESI $^+$ )  $m/z$  Calculated for  $\text{C}_{39}\text{H}_{61}\text{O}_4\text{Si}$   $[\text{M}+\text{H}]^+$ : 621.4334, found:621.4337

IR (thin film)  $\nu_{\text{max}}$  ( $\text{cm}^{-1}$ ): 2929, 1463, 1250, 1166, 1110, 833.

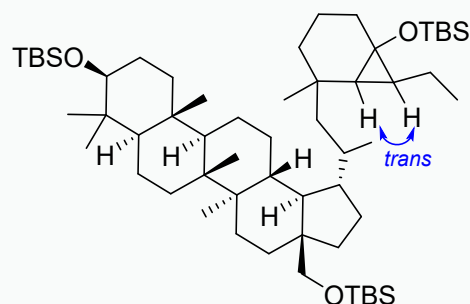

**3v**

**Physical state:** white solid, m.p. 202.6 – 203.4 °C

**Rf** = 0.9 (PE; anisaldehyde) 58 mg, 2.3:1 dr, 62%

$^1\text{H}$  NMR (400 MHz, Acetone- $d_6$ )  $\delta$  3.76 – 3.67 (m, 1H), 3.21 (td,  $J = 7.6, 3.8$  Hz, 2H), 1.92 – 1.78 (m, 3H), 1.74 – 1.17 (m, 27H), 1.16 – 0.99 (m, 10H), 0.99 – 0.89 (m, 9H), 0.88 – 0.78 (m, 34H), 0.69 (s, 3H), 0.48 (d,  $J = 6.1$  Hz, 0.28H), 0.42 (d,  $J = 6.1$  Hz, 0.65H), 0.38 – 0.24 (m, 0.94H), 0.12 (s, 2.59H), 0.06 (s, 2.45H), 0.00 (s, 10.53H), -0.08 (s, 2.59H).

$^{13}\text{C}$  NMR (100 MHz, Acetone- $d_6$ )  $\delta$  79.32, 60.14, 55.15, 50.34, 48.07, 47.92, 46.61, 42.87, 41.42, 41.02, 39.74, 39.24, 38.48, 37.15, 36.90, 34.61, 34.33, 33.55, 31.97, 31.57, 30.50, 28.00, 27.71, 27.27, 26.94, 25.46, 25.28, 23.39, 22.79, 21.69, 20.95, 18.32, 18.00, 17.79, 17.62, 15.75, 15.59, 15.50, 14.48, 13.68, -0.90, -4.45, -5.59, -6.13.

HRMS(APCI-TOF)  $m/z$  Calculated for  $\text{C}_{58}\text{H}_{111}\text{O}_3\text{Si}_3$   $[\text{M}+\text{H}]^+$ : 939.7836, found: 939.7833.

IR (thin film)  $\nu_{\text{max}}$  ( $\text{cm}^{-1}$ ): 2928, 1462, 1252, 1097, 834.

#### 4. Synthesis of compound 5 was confirmed by single-crystal X-ray diffraction analysis

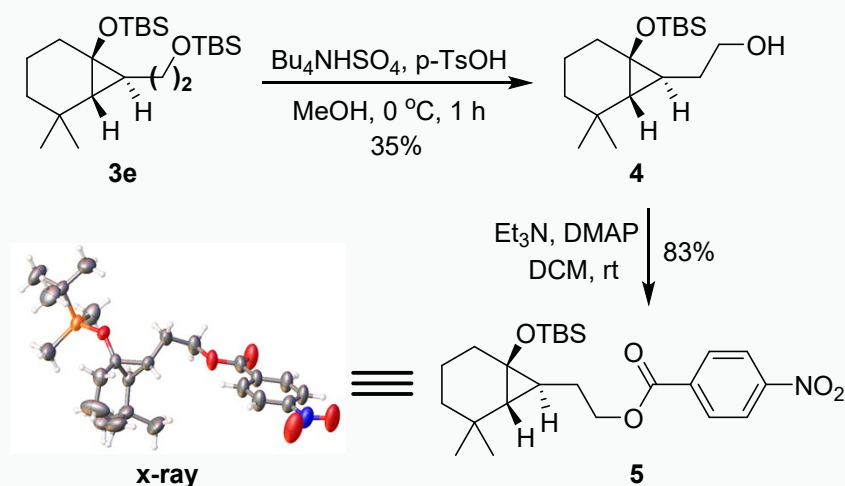

Compound **3e** (0.1 mmol, 41.2 mg) dissolved in 5 mL of methanol was stirred at  $0\text{ }^\circ\text{C}$  for 30 min. Then  $\text{Bu}_4\text{NH}_4\text{SO}_4$  (3.5 mg, 0.01 mmol) and  $p\text{-TsOH}$  (1 mg, 0.006 mmol) was added to above the mixture which was stirred at  $0\text{ }^\circ\text{C}$  for 1 h. The reaction was quenched with water (5 mL) and extracted with EA. the organic layer was dried over  $\text{Na}_2\text{SO}_4$ , filtrated and concentrated under reduced pressure. The residue was purified via column chromatography to give desired product **4** (14.4 mg, 35%)

To a solution of compound **4** (14.4 mg, 0.05 mmol) in  $\text{DCM}$  (5 mL) at rt was added  $\text{DMAP}$  (0.1 eq) and 4-Nitrobenzoyl chloride (9 mg, 0.05 mmol). the reaction mixture was stirred at rt for 12 h before being concentrated in vacuo to give the crude reaction mixture. The residue was purified via column chromatography to give desired product **4**.

**Physical state:** yellow solid, m.p.  $106.6 - 107.4\text{ }^\circ\text{C}$

**Rf** = 0.5 (PE: EA = 5:1; UV) 18.5 mg, 83%

**$^1\text{H NMR}$**  (400 MHz,  $\text{Acetone-}d_6$ )  $\delta$  8.38 (d,  $J = 9.0\text{ Hz}$ , 2H), 8.30 (d,  $J = 9.0\text{ Hz}$ , 2H), 4.46 (qdd,  $J = 10.6, 7.0, 6.2\text{ Hz}$ , 2H), 2.02 – 1.82 (m, 4H), 1.59 – 1.47 (m, 1H), 1.16 (s, 3H), 1.12 – 0.98 (m, 2H), 0.88 (d,  $J = 2.8\text{ Hz}$ , 13H), 0.68 – 0.61 (m, 2H), 0.18 (s, 3H), 0.16 (s, 3H).

**$^{13}\text{C NMR}$**  (100 MHz,  $\text{Acetone-}d_6$ )  $\delta$  166.19, 137.82, 132.46, 125.42, 67.69, 61.86, 39.57, 37.85, 34.44, 32.76, 29.67, 29.31, 27.06, 24.26, 20.20, 19.40, -2.08, -2.20.

**HRMS(APCI-TOF)**  $m/z$  Calculated for  $\text{C}_{24}\text{H}_{38}\text{NO}_5\text{Si}$   $[\text{M}+\text{H}]^+$ : 448.2519, found: 44.2514

**IR (thin film)**  $\nu_{\text{max}}$  ( $\text{cm}^{-1}$ ): 2954, 2929, 1727, 1530, 1277, 836.

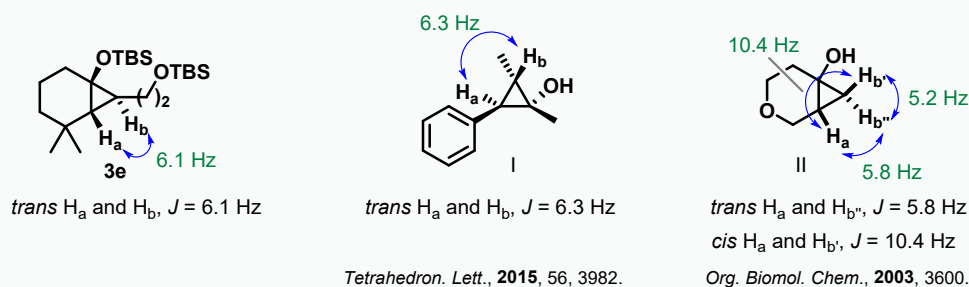

The relative configuration of the compound **3e** is confirmed by single-crystal X-ray diffraction analysis where the hydrogen coupling constant between H<sub>a</sub> and H<sub>b</sub> is 6.1 Hz with *trans*-configuration. Moreover, the hydrogen coupling constant of H<sub>a</sub> and H<sub>b</sub> for the other fused bicyclic cyclopropanols in this work is between 3.0-7.6 Hz. Wang & Lv report the coupling constant between H<sub>a</sub> with H<sub>b</sub> in *trans* cyclopropanols **I** equal to 6.3 Hz.<sup>[9a]</sup> Ollivier and co-workers reveal the coupling constant between H<sub>a</sub> with H<sub>b'</sub> in compound **II** is 5.8 Hz with *trans*-configuration while the coupling constant between H<sub>a</sub> with H<sub>b'</sub> is 10.4 Hz with *cis*-configuration.<sup>[9b]</sup> In above cases, the value of coupling constant in *cis*-configuration is much higher than the value in *trans*-configuration. Based on the above information, we determine the relative configurations of other fused bicyclic cyclopropanols in our work are consistent with compound **3e**.

## 5. Preliminary mechanistic studies

### 5.1 Synthesis of compound **3a'**

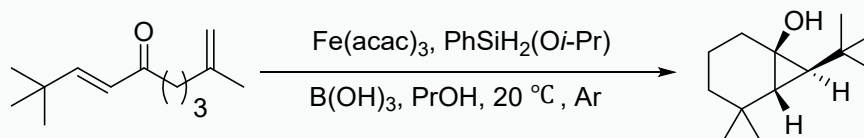

Fe(acac)<sub>3</sub> (7 mg, 0.02 mmol) was added to the solution of a, β-unsaturated compound (19.8 mg, 0.1 mmol) in 1.5 mL *n*-PrOH at 20 °C under Ar atmosphere. Then PhSiH<sub>2</sub>(*Oi*-Pr) (2.5 eq.) and B(OMe)<sub>3</sub> (2.0 eq.) was added to the above solution and the reaction was stirred at 20 °C until the starting material was consumed. Then, the reaction mixture was direct purified by neutral alumina column chromatography.

**Physical state:** oil,

**Rf** = 0.4 (PE: EA = 5:1; anisaldehyde) 17.6 mg, 90%

<sup>1</sup>H NMR (400 MHz, Acetone-*d*<sub>6</sub>) δ 3.88 (s, 1H), 1.92 – 1.78(m, 2H), 1.48 – 1.43 (m, 1H), 1.14 (dddd,  $J = 13.4, 8.2, 6.6, 5.4, 2.9$  Hz, 1H), 1.08 (s, 3H), 1.04 – 1.01 (m, 1H), 0.99 (s, 9H), 0.98 – 0.92 (m, 1H), 0.84 (s, 3H), 0.80 (d,  $J = 7.4$  Hz, 1H), 0.26 (d,  $J = 7.4$  Hz, 1H).

<sup>13</sup>C NMR (100 MHz, Acetone-*d*<sub>6</sub>) δ 58.64, 37.75, 35.96, 34.50, 33.46, 30.84, 30.18, 29.53, 28.66, 27.81, 18.49.

**HRMS(APCI-TOF)** *m/z* Calculated for C<sub>13</sub>H<sub>24</sub>DO[M+H]<sup>+</sup>:197.1095, found: 197.1099.

**IR (thin film)  $\nu_{\max}$  ( $\text{cm}^{-1}$ ):** 2925, 1705, 1461, 1365.

### 5.2 Deuteration study with $\text{PhSiD}_3$

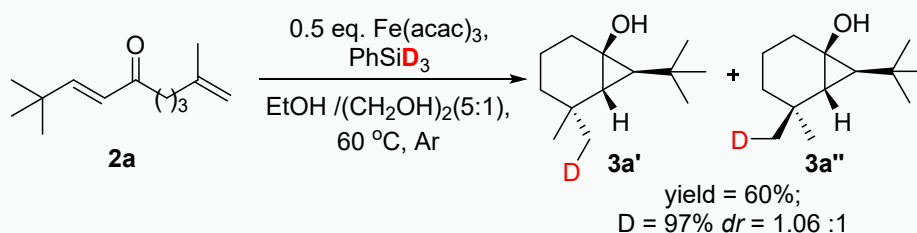

$\text{Fe}(\text{acac})_3$  (0.5 eq.) was added to the solution of a,  $\beta$ -unsaturated compound (0.1 mmol) in 1.5 mL EtOH and 0.3 mL  $(\text{CH}_2\text{OH})_2$  under Ar atmosphere. Then  $\text{PhSiD}_3$  (2.5 eq.) was added to the above solution and the reaction was stirred at 60 °C for 12 h. Then, the reaction mixture was directly purified by neutral alumina column chromatography to give the desired compound (11.8 mg, 60%) (D = 97%; dr = 1.06:1 or 1:1.06)

**$^1\text{H}$  NMR** (400 MHz, Acetone- $d_6$ )  $\delta$  3.85 (s, 1H), 1.99 – 1.71 (m, 2H), 1.57 – 1.38 (m, 1H), 1.16 (dddd,  $J = 13.4, 8.2, 6.6, 5.4, 2.9$  Hz, 1H), 1.09 (s, 1.41H), 1.08 – 1.06 (m, 1.09H), 1.04 (dd,  $J = 8.2, 3.2$  Hz, 1H), 1.01 (s, 9H), 0.97 (dd,  $J = 9.6, 3.1$  Hz, 1H), 0.85 (s, 1.50H), 0.83 (t,  $J = 1.8$  Hz, 1.03H), 0.81 (d,  $J = 7.4$  Hz, 1H), 0.27 (d,  $J = 7.3$  Hz, 1H);  **$^{13}\text{C}$  NMR** (100 MHz, Acetone- $d_6$ )  $\delta$  59.41, 38.53, 36.68, 35.24, 34.23, 31.55, 30.91, 30.27, 29.37, 28.48, 19.23.

**HRMS(APCI-TOF)  $m/z$**  Calculated for  $\text{C}_{13}\text{H}_{24}\text{DO}[\text{M}+\text{H}]^+$ : 198.1963, found: 198.1962.

**IR (thin film)  $\nu_{\max}$  ( $\text{cm}^{-1}$ ):** 2925, 1705, 1461, 1365.

### 5.3 Competitive experimental study

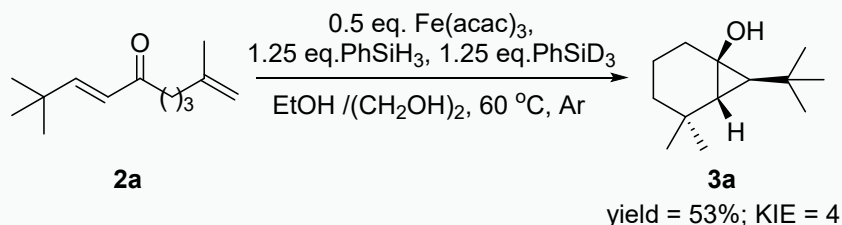

To solution of **2a** (20.1 mg, 0.1 mmol) and  $\text{Fe}(\text{acac})_3$  (0.5 eq.) in 1.5 mL EtOH and 0.3 mL  $(\text{CH}_2\text{OH})_2$  was added  $\text{PhSiD}_3$  (1.25 eq) and  $\text{PhSiH}_3$  (1.25 eq.) under Ar atmosphere. Then the reaction was stirred at 60 °C for 12 h. Then, the reaction mixture was directly purified by neutral alumina column chromatography to give the desired compound (10.3 mg, 53%).

**$^1\text{H}$  NMR** (400 MHz, Acetone- $d_6$ )  $\delta$  3.85 (s, 1H), 1.96 – 1.76 (m, 2H), 1.54 – 1.39 (m, 1H), 1.22 – 1.12 (m, 1H), 1.09 (s, 2.44H), 1.07 – 1.05 (m, 0.44H), 1.04 (dd,  $J = 8.2, 3.2$  Hz, 1H), 1.01 (s, 9H), 0.99 – 0.91 (m, 1H), 0.85 (s, 2.55H), 0.84 – 0.82 (m, 0.37H), 0.81 (d,  $J = 7.4$  Hz, 1H), 0.27 (d,  $J = 7.3$  Hz, 1H).

### 5.4 Radical inhibiting experiment



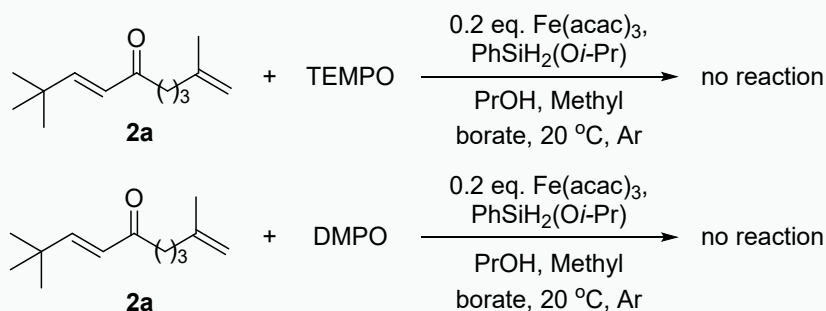

Fe(acac)<sub>3</sub> was added to the solution of compound **2a** (0.1 mmol, 20 mg) in 1.5 mL *n*-PrOH at 20 °C under Ar atmosphere. Then PhSiH<sub>2</sub>(*Oi*-Pr) (2.5 eq) and B(OMe)<sub>3</sub> (2 eq) was added to the above solution. After that, TEMPO (1.5 eq) or DMPO (1.5 eq) was added to above solution and the reaction was stirred at 20 °C for 5 h. The reaction didn't proceed under this condition.

### 5.5 Radical clock experiment

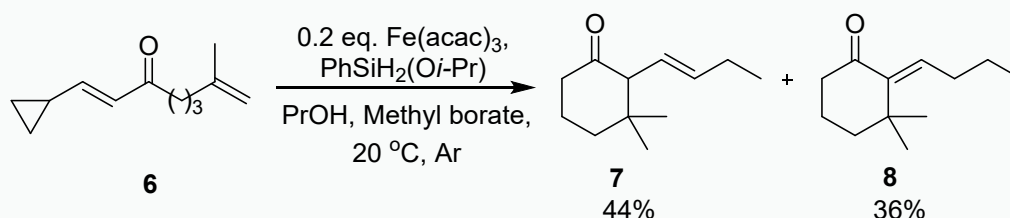

Fe(acac)<sub>3</sub> (0.2 eq) was added to the solution of a, β-unsaturated compound (35.6 mg, 0.2 mmol) in 3 mL *n*-PrOH at 20 °C under Ar atmosphere. Then PhSiH<sub>2</sub>(*Oi*-Pr) (2.5 eq) and B(OMe)<sub>3</sub> (2.0 eq) was added to the above solution and the reaction was stirred at 20 °C until the starting material was consumed. The resulting mixture was the direct purified by column chromatography to give the **7** (15.8 mg, 44%) and **8** (12.9 mg, 36%)

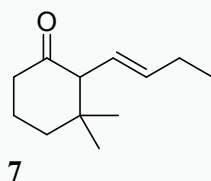

**Physical state:** colorless oil

**<sup>1</sup>H NMR** (400 MHz, CD<sub>3</sub>OD) δ 5.67 – 5.40 (m, 2H), 2.80 (d, *J* = 8.6 Hz, 1H), 2.40 – 2.28 (m, 2H), 2.17 – 1.99 (m, 2H), 1.98 – 1.82 (m, 2H), 1.80 – 1.47 (m, 2H), 1.00 (t, *J* = 7.5 Hz, 3H), 0.96 (s, 3H), 0.82 (s, 3H).; **<sup>13</sup>C NMR** (100 MHz, CD<sub>3</sub>OD) δ 216.22, 138.72, 125.33, 66.89, 42.15, 41.29, 39.82, 30.32, 27.60, 24.68, 24.15, 14.95.

**HRMS(APCI-TOF)** *m/z* Calculated for C<sub>12</sub>H<sub>21</sub>O [M+H]<sup>+</sup>: 181.1587, found: 181.1584.

**IR (thin film)** *v*<sub>max</sub> (cm<sup>-1</sup>): 2959, 2930, 1710, 1460, 1075.

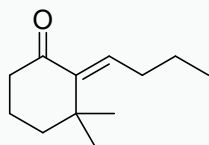

**8**

**Physical state:** colorless oil

**<sup>1</sup>H NMR** (400 MHz, CD<sub>3</sub>OD) δ 5.57 (t, *J* = 7.5 Hz, 1H), 2.39 (t, *J* = 6.8 Hz, 2H), 2.11 (q, *J* = 7.4 Hz, 2H), 2.00 – 1.80 (m, 2H), 1.77 – 1.55 (m, 2H), 1.40 (q, *J* = 7.4 Hz, 2H), 1.08 (s, 6H), 0.89 (t, *J* = 7.4 Hz, 3H).

**<sup>13</sup>C NMR** (100 MHz, CDCl<sub>3</sub>) δ 211.78, 151.70, 133.91, 133.88, 64.76, 44.36, 43.34, 43.16, 43.10, 42.08, 34.81, 34.51, 32.18, 30.71, 27.57, 26.84, 26.52, 26.42, 25.41, 24.65, 24.56, 16.88, 16.63.

**HRMS(APCI-TOF)** *m/z* Calculated for C<sub>12</sub>H<sub>21</sub>O[M+H]<sup>+</sup>: 181.1587, found: 181.1580.

**IR (thin film) ν<sub>max</sub> (cm<sup>-1</sup>):** 2917, 2850, 1463, 1084, 1023.

### 5.6 The experiment for exploring the relative stereochemistry of cyclopropanols

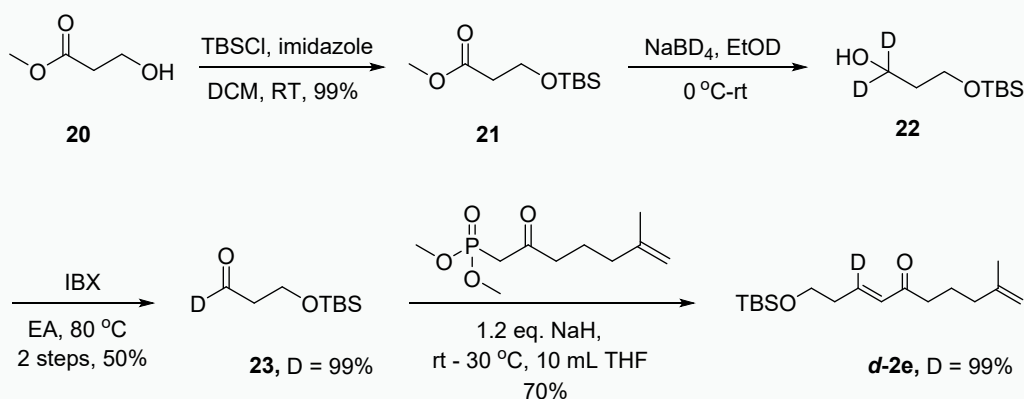

Imidazole (3.4 g, 48.8 mmol) and tert-butyldimethylsilyl chloride (7.4 g, 48.8 mmol) was slowly added to a solution of 3-hydroxy-propionic acid methyl ester (1.8 g, 18 mmol) in 20 mL of CH<sub>2</sub>Cl<sub>2</sub> at RT. The reaction was stirred for 2 h, Then, the reaction was poured into 50 mL of water, and extracted with CH<sub>2</sub>Cl<sub>2</sub> (3 x 50 mL). The combined organic layers were dried with Na<sub>2</sub>SO<sub>4</sub>, filtered and concentrated. The oil was purified by flash chromatography to give the desired product **21** (3.8 g, 99%).

**Physical state:** colorless oil

**R<sub>f</sub>** = 0.7 (PE; anisaldehyde)

**<sup>1</sup>H NMR** (400 MHz, CDCl<sub>3</sub>) δ 3.88 (t, *J* = 6.4 Hz, 2H), 3.67 (s, 3H), 2.52 (t, *J* = 6.4 Hz, 2H), 0.86 (s, 9H), 0.04 (s, 6H).

**<sup>13</sup>C NMR** (100 MHz, CDCl<sub>3</sub>) δ 172.26, 59.08, 51.51, 37.91, 25.81, 18.23, -5.43.

A dry flask was charged with compound **21** (1.09 g, 5 mmol) and EtOD (5 mL) under Ar atmosphere. The reaction was stirred at 0 °C for 30 min. Then NaBD<sub>4</sub> (246 mg, 6 mmol) was

added to the above suspension and the reaction was stirred at 0 °C for another 2 h. The reaction was the direct concentrated under reduced pressure to give the desired product which was used for the next step without the further purified. To a suspension of IBX (3.36 g, 12 mmol) in EA was added above residue and the mixture was stirred at 80 °C for 12 h, the reaction was filtrated and concentrated under reduced pressure. The crude product was purified on SiO<sub>2</sub> to give the compound **23** (472.5 mg, 50 %, D = 99%).

**Physical state:** colorless oil

**Rf** = 0.7 (PE : EA = 10:1; anisaldehyde)

**<sup>1</sup>H NMR** (400 MHz, CDCl<sub>3</sub>) δ 9.74 (t, *J* = 2.1 Hz, 0.01 H), 3.92 (t, *J* = 6.1 Hz, 2H), 2.53 (t, *J* = 6.0 Hz, 2H), 0.82 (s, 9H), 0.00 (s, 3H).

**<sup>13</sup>C NMR** (100 MHz, CDCl<sub>3</sub>) δ 202.04, 201.78, 201.51, 57.40, 46.44, 46.40, 46.37, 25.81, 18.22, -5.45.

To the solution of the phosphonate (524 mg, 2.0 mmol) in the 10 mL dry THF was added NaH (96 mg, 2.4 mmol) under Ar at rt. The reaction was stirred at rt for 30 min. Then aldehyde **23** (453.6 mg, 2.4 mmol) was added. The mixture was stirred at 30 °C for another 24 h and quenched with saturated NH<sub>4</sub>Cl (10 mL). The organic layer was separated and water layer was extracted with EA and dried over Na<sub>2</sub>SO<sub>4</sub>. The combined organic layers were evaporated and the residue was purified via column chromatography to give desired product (415.8 mg, 70%, D = 99%).

**Physical state:** colorless oil

**Rf** = 0.8 (PE : EA = 10:1; UV)

**<sup>1</sup>H NMR** (400 MHz, CDCl<sub>3</sub>) δ 6.78 (dt, *J* = 15.9, 7.0 Hz, 0.01H). 6.07 (s, 1H), 4.67 (s, 1H), 4.62 (s, 1H), 3.68 (t, *J* = 6.4 Hz, 2H), 2.50 – 2.45 (m, 2H), 2.41 – 2.30 (m, 2H), 2.04 – 1.93 (m, 2H), 1.76 – 1.68 (m, 2H), 1.66 (s, 3H), 0.84 (s, 9H), 0.00 (s, 3H).

**<sup>13</sup>C NMR** (100 MHz, CDCl<sub>3</sub>) δ 200.52, 145.11, 131.85, 110.52, 61.59, 39.14, 37.16, 35.81, 25.88, 22.21, 21.90, 18.29, -5.32

**HRMS(ESI<sup>+</sup>)** *m/z* Calculated for C<sub>17</sub>H<sub>32</sub>DO<sub>2</sub>Si [M+H]<sup>+</sup>: 298.2307, found: 298.2301

**IR (thin film) ν<sub>max</sub> (cm<sup>-1</sup>):** 2954.14, 2925.26, 1461.96, 1377.12, 1100.72.

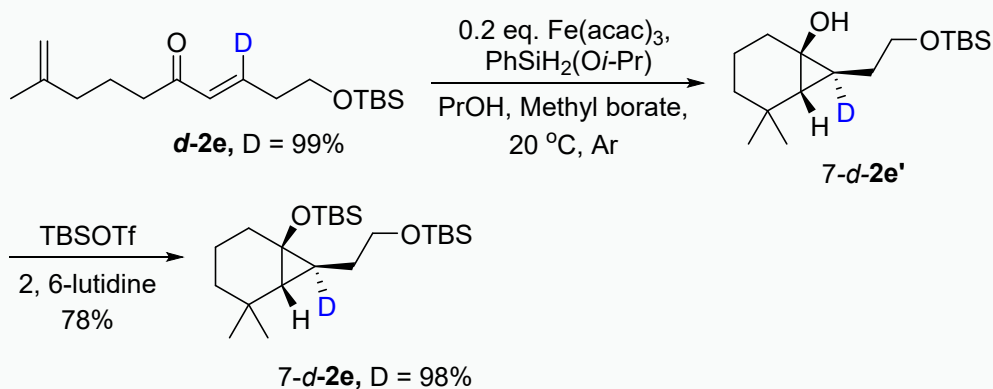

Fe(acac)<sub>3</sub> (0.2 eq) was added to the solution of compound ***d-2e*** (0.1 mmol, 30 mg) in 1.5 mL *n*-PrOH at 20 °C under Ar atmosphere. Then PhSiH<sub>2</sub>(*Oi-Pr*) (2.5 eq.) and B(OMe)<sub>3</sub> (2 eq.) was added to the above solution and the reaction was stirred at 20 °C for 4 h. The resulting mixture was directed purified by neutral alumina column chromatography. After that 2,6-lutidine (6 eq.) was added to the received compound ***7-d-2e'*** in dry DCM (5 mL) and the solution was stirred at 0 °C for 30min, then slow addition of TBSOTf (3 eq.). The reaction was stirred at 0 °C for another 1h. The reaction was quenched with saturated NaHCO<sub>3</sub> (5 mL) and extracted with EA, the organic layer was dried over Na<sub>2</sub>SO<sub>4</sub>, filtrated and concentrated under reduced pressure. the crude product was purified on SiO<sub>2</sub> to give the compound ***7-d-2e*** (32 mg, 78%)

<sup>1</sup>H NMR (400 MHz, Acetone-*d*<sub>6</sub>) δ 3.64 (ddd, *J* = 7.0, 6.5, 2.4 Hz, 2H), 1.92 – 1.70 (m, 2H), 1.59 (dt, *J* = 13.5, 6.8 Hz, 1H), 1.54 – 1.37 (m, 2H), 1.09 (s, 3H), 1.06 – 0.88 (m, 3H), 0.85 (s, 9H), 0.82 (s, 9H), 0.81 (s, 3H), 0.49 (s, 1.02H), 0.13 (s, 3H), 0.07 (s, 3H), 0.00 (d, *J* = 2.1 Hz, 6H).

<sup>13</sup>C NMR (100 MHz, Acetone-*d*<sub>6</sub>) δ 62.92, 59.91, 37.76, 36.17, 32.84, 31.99, 31.06, 28.01, 25.43, 25.29, 18.46, 17.92, 17.61, -3.88, -3.94, -5.93, -5.97.

HRMS(APCI-TOF) *m/z* Calculated for C<sub>23</sub>DH<sub>47</sub>O<sub>2</sub>Si<sub>2</sub>[M+H]<sup>+</sup>: 414.3328, found: 414.3329.

IR (thin film)  $\nu_{\max}$  (cm<sup>-1</sup>): 2928, 2856, 1462, 1195, 1092, 833.

## 6. X-ray Crystallographic Data:

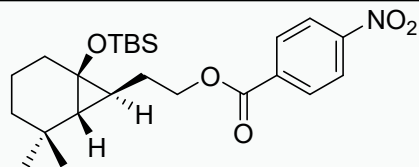

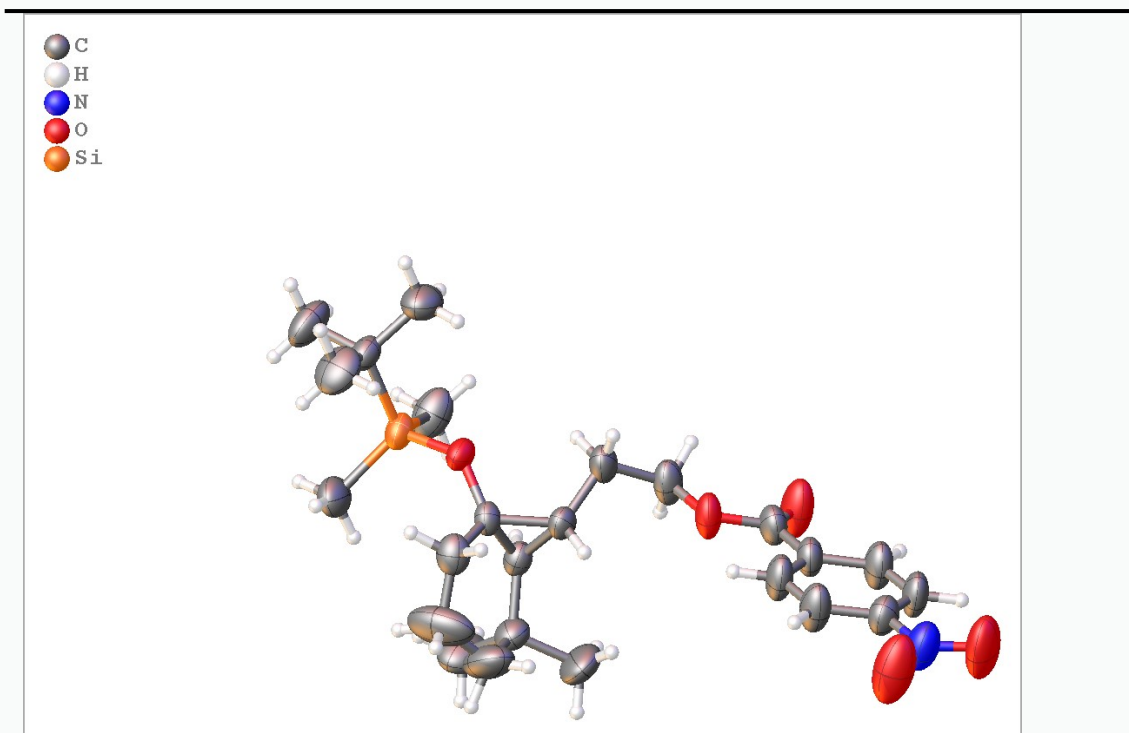

1. X-ray crystallographic data for compound **5** (CCDC 2083784):

**Table 5** Crystal data and structure refinement for compound **5**

|                       |                                                    |
|-----------------------|----------------------------------------------------|
| Empirical formula     | C <sub>24</sub> H <sub>37</sub> NO <sub>5</sub> Si |
| Formula weight        | 447.63                                             |
| Temperature/K         | 293.15                                             |
| Crystal system        | monoclinic                                         |
| Space group           | P2 <sub>1</sub> /c                                 |
| a/Å                   | 25.9894(16)                                        |
| b/Å                   | 7.4776(8)                                          |
| c/Å                   | 13.2343(12)                                        |
| α/°                   | 90                                                 |
| β/°                   | 95.539(7)                                          |
| γ/°                   | 90                                                 |
| Volume/Å <sup>3</sup> | 2559.9(4)                                          |
| Z                     | 4                                                  |

|                                                |                                                               |
|------------------------------------------------|---------------------------------------------------------------|
| $\rho_{\text{calc}}/\text{cm}^3$               | 1.161                                                         |
| $\mu/\text{mm}^{-1}$                           | 0.124                                                         |
| F(000)                                         | 968.0                                                         |
| Crystal size/ $\text{mm}^3$                    | $0.35 \times 0.3 \times 0.25$                                 |
| Radiation                                      | MoK $\alpha$ ( $\lambda = 0.71073$ )                          |
| 2 $\Theta$ range for data collection/          | 6.186 to 52.744                                               |
| Index ranges                                   | $-32 \leq h \leq 29, -9 \leq k \leq 9, -14 \leq l \leq 16$    |
| Reflections collected                          | 11655                                                         |
| Independent reflections                        | 5225 [ $R_{\text{int}} = 0.0550, R_{\text{sigma}} = 0.0834$ ] |
| Data/restraints/parameters                     | 5225/0/287                                                    |
| Goodness-of-fit on $F^2$                       | 1.020                                                         |
| Final R indexes [ $I \geq 2\sigma(I)$ ]        | $R_1 = 0.0959, wR_2 = 0.2056$                                 |
| Final R indexes [all data]                     | $R_1 = 0.1638, wR_2 = 0.2474$                                 |
| Largest diff. peak/hole / $e \text{ \AA}^{-3}$ | 0.28/-0.34                                                    |

2. X-ray crystallographic data for compound **2v** (CCDC 2083785):

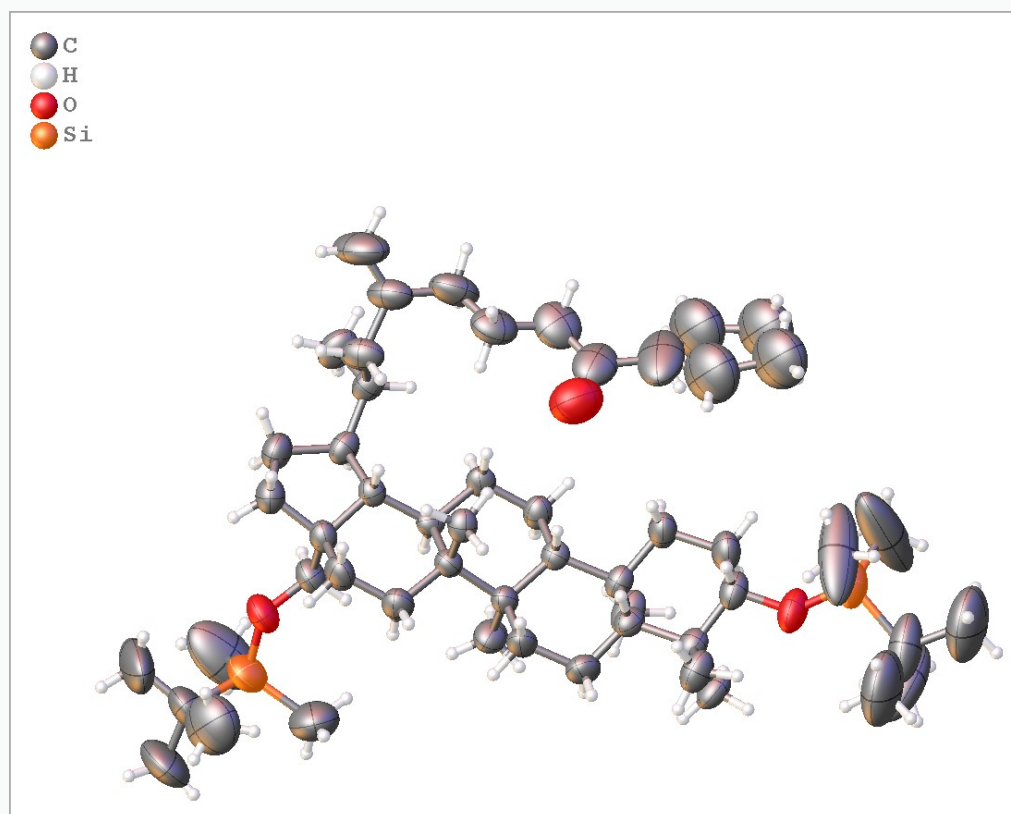

**Table 6** Crystal data and structure refinement for compound **2v**

|                                       |                       |
|---------------------------------------|-----------------------|
| Empirical formula                     | $C_{51}H_{92}O_3Si_2$ |
| Formula weight                        | 809.42                |
| Temperature/K                         | 293.15                |
| Crystal system                        | monoclinic            |
| Space group                           | $P2_1$                |
| $a/\text{\AA}$                        | 11.479(3)             |
| $b/\text{\AA}$                        | 12.0136(15)           |
| $c/\text{\AA}$                        | 20.224(3)             |
| $\alpha/^\circ$                       | 90                    |
| $\beta/^\circ$                        | 105.64(2)             |
| $\gamma/^\circ$                       | 90                    |
| Volume/ $\text{\AA}^3$                | 2685.7(9)             |
| $Z$                                   | 2                     |
| $\rho_{\text{calc}}/\text{g cm}^{-3}$ | 1.001                 |
| $\mu/\text{mm}^{-1}$                  | 0.101                 |
| $F(000)$                              | 900.0                 |

|                                                  |                                                                        |
|--------------------------------------------------|------------------------------------------------------------------------|
| Crystal size/mm <sup>3</sup>                     | 0.35 × 0.3 × 0.25                                                      |
| Radiation                                        | MoK $\alpha$ ( $\lambda = 0.71073$ )                                   |
| 2 $\Theta$ range for data collection/ $^{\circ}$ | 6.276 to 52.74                                                         |
| Index ranges                                     | -10 $\leq$ h $\leq$ 14, -13 $\leq$ k $\leq$ 15, -22 $\leq$ l $\leq$ 25 |
| Reflections collected                            | 11934                                                                  |
| Independent reflections                          | 9462 [ $R_{\text{int}} = 0.0149$ , $R_{\text{sigma}} = 0.0539$ ]       |
| Data/restraints/parameters                       | 9462/6/512                                                             |
| Goodness-of-fit on F <sup>2</sup>                | 1.010                                                                  |
| Final R indexes [ $I \geq 2\sigma(I)$ ]          | $R_1 = 0.0776$ , $wR_2 = 0.1931$                                       |
| Final R indexes [all data]                       | $R_1 = 0.1253$ , $wR_2 = 0.2296$                                       |
| Largest diff. peak/hole / e $\text{\AA}^{-3}$    | 0.33/-0.33                                                             |
| Flack parameter                                  | -0.04(6)                                                               |



## 7 Spectra of Products.

(*E*)-2,2,9-trimethyldeca-3,9-dien-5-one (**2a**) (Using CDCl<sub>3</sub> as solvent)

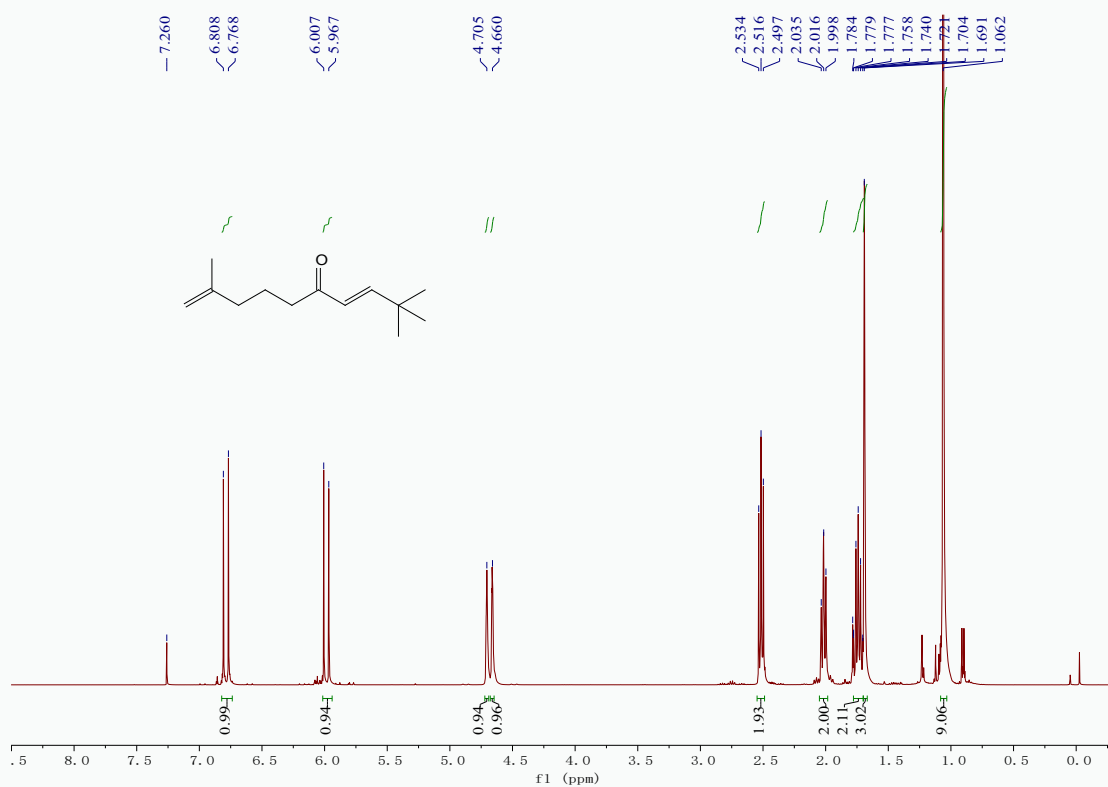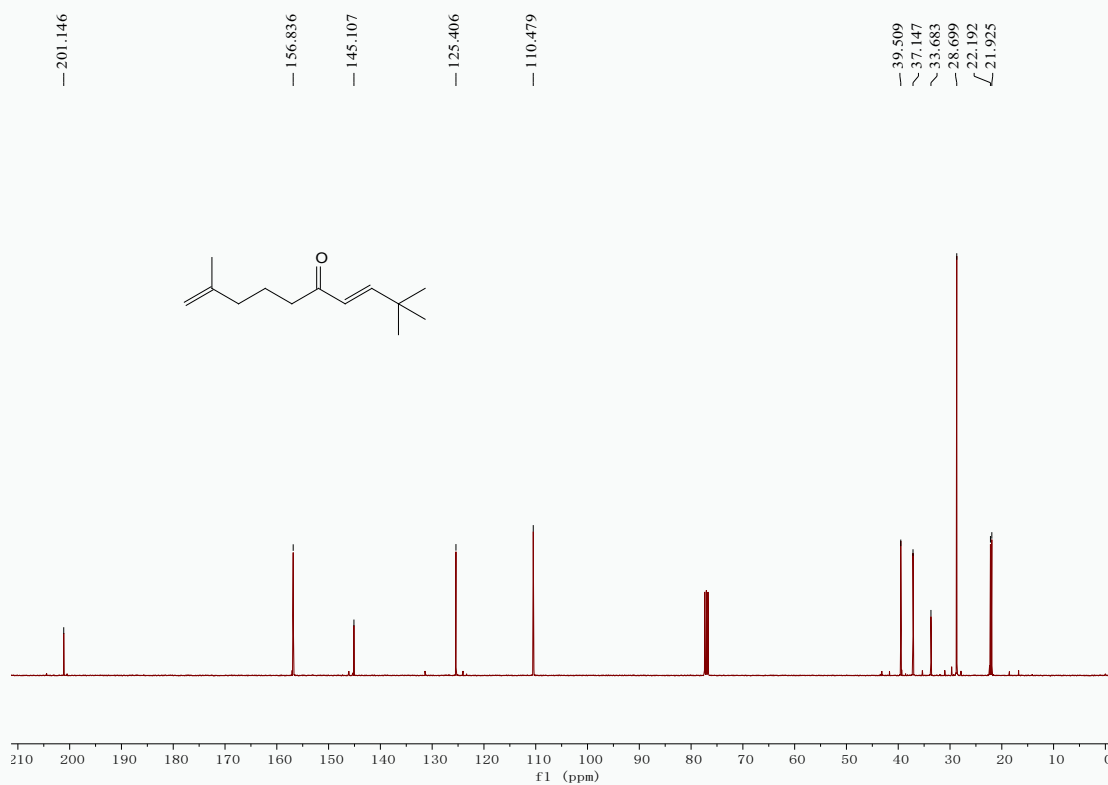

(*E*)-9-methyldeca-3,9-dien-5-one (**2b**) (Using CDCl<sub>3</sub> as solvent)

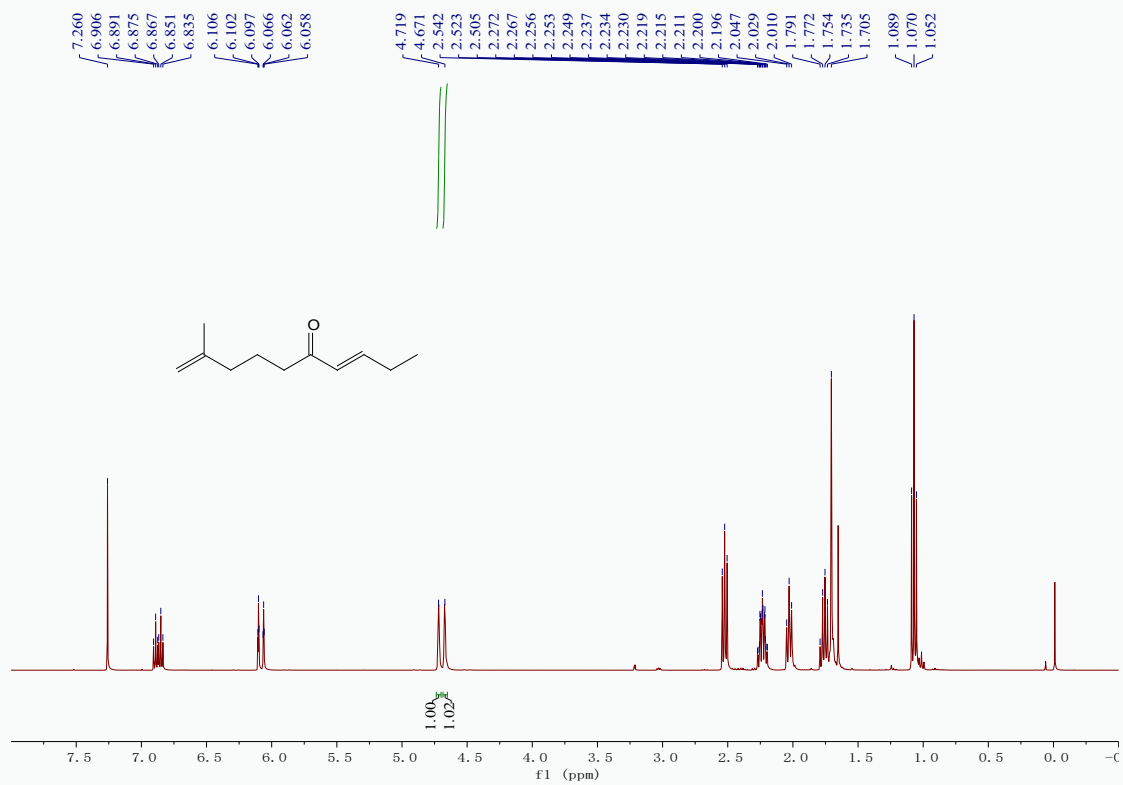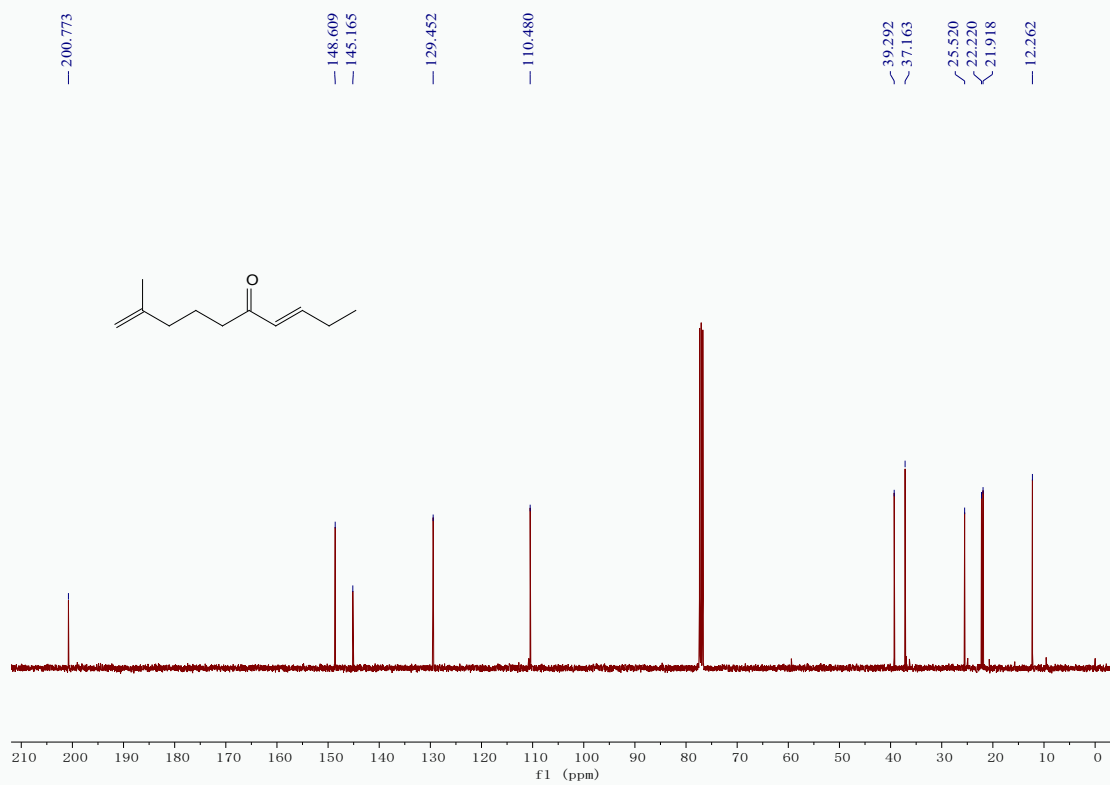

(E)-2,9-dimethyldeca-3,9-dien-5-one (**2c**) (Using CDCl<sub>3</sub> as solvent)

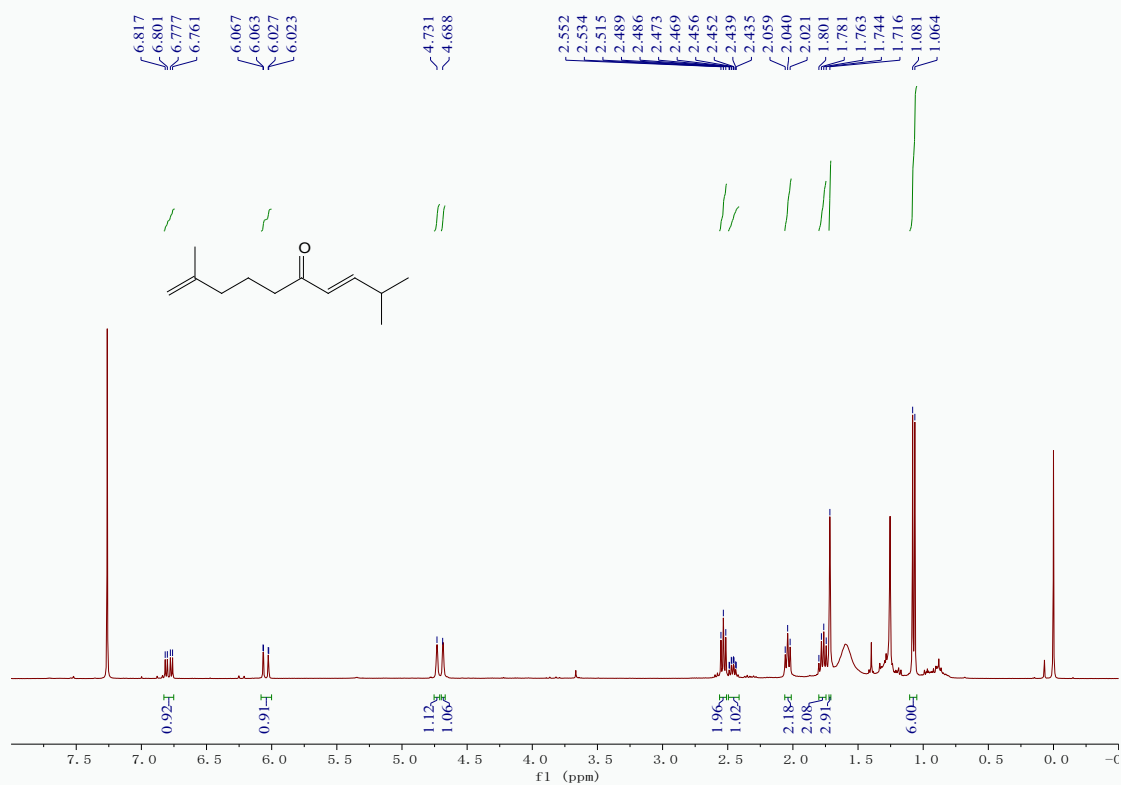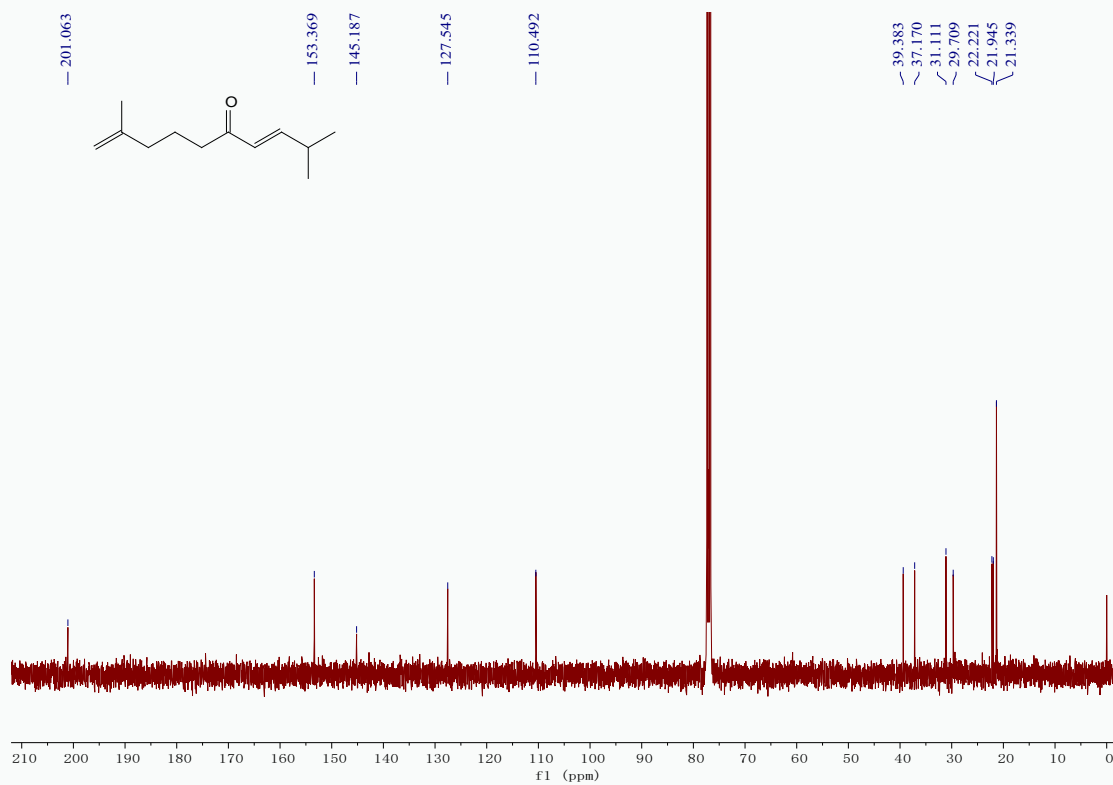

(*E*)-2-methylpentadeca-1,7-dien-6-one (**2d**) (Using CDCl<sub>3</sub> as solvent)

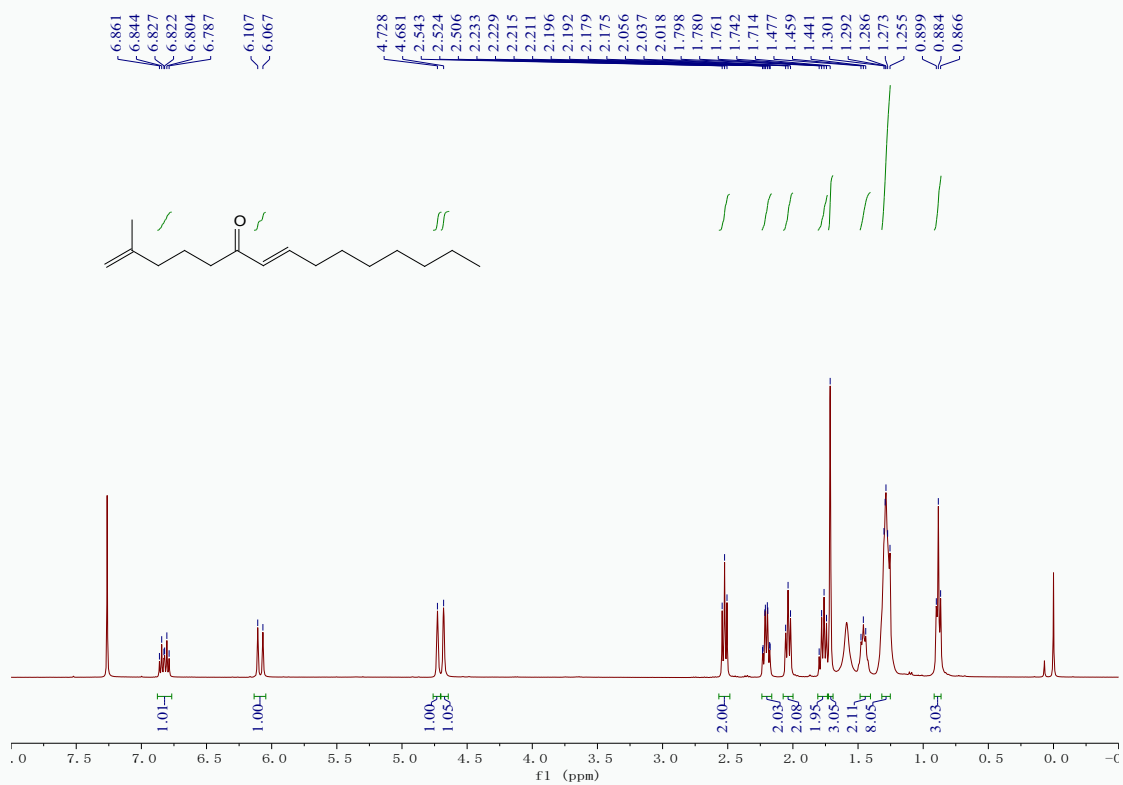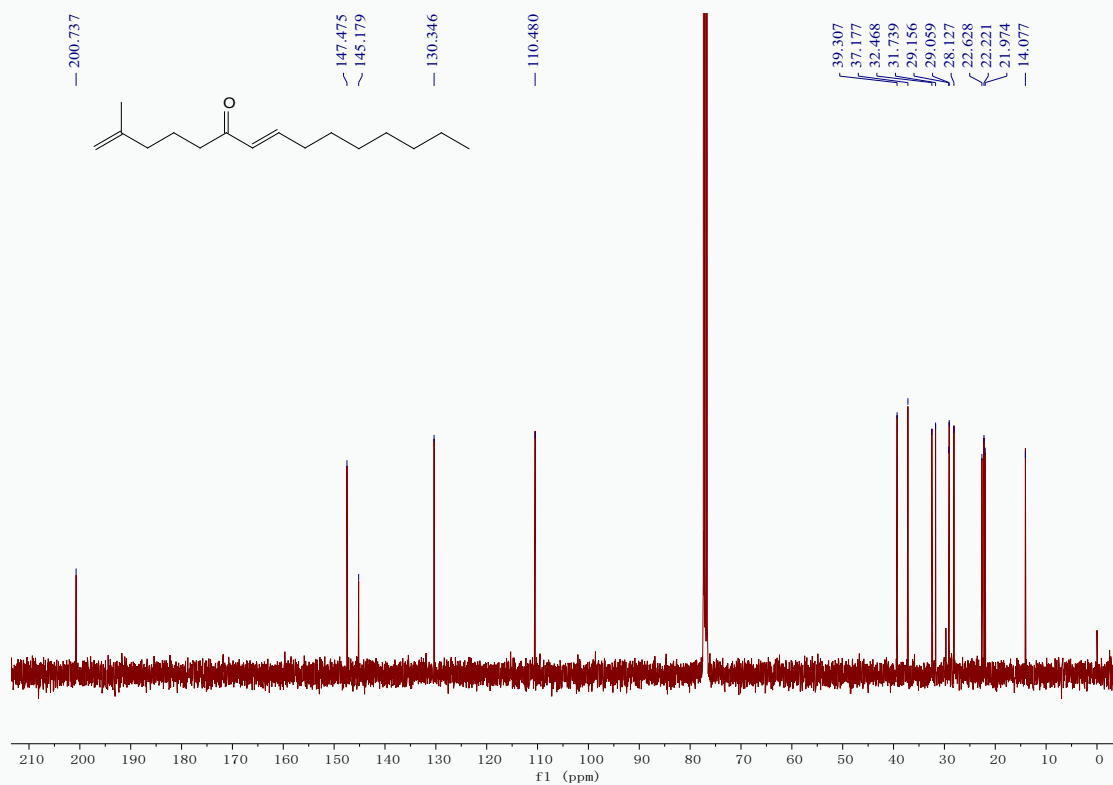

(*E*)-1-((*tert*-butyldimethylsilyl)oxy)-9-methyldeca-3,9-dien-5-one (**2e**) (Using CDCl<sub>3</sub> as solvent)

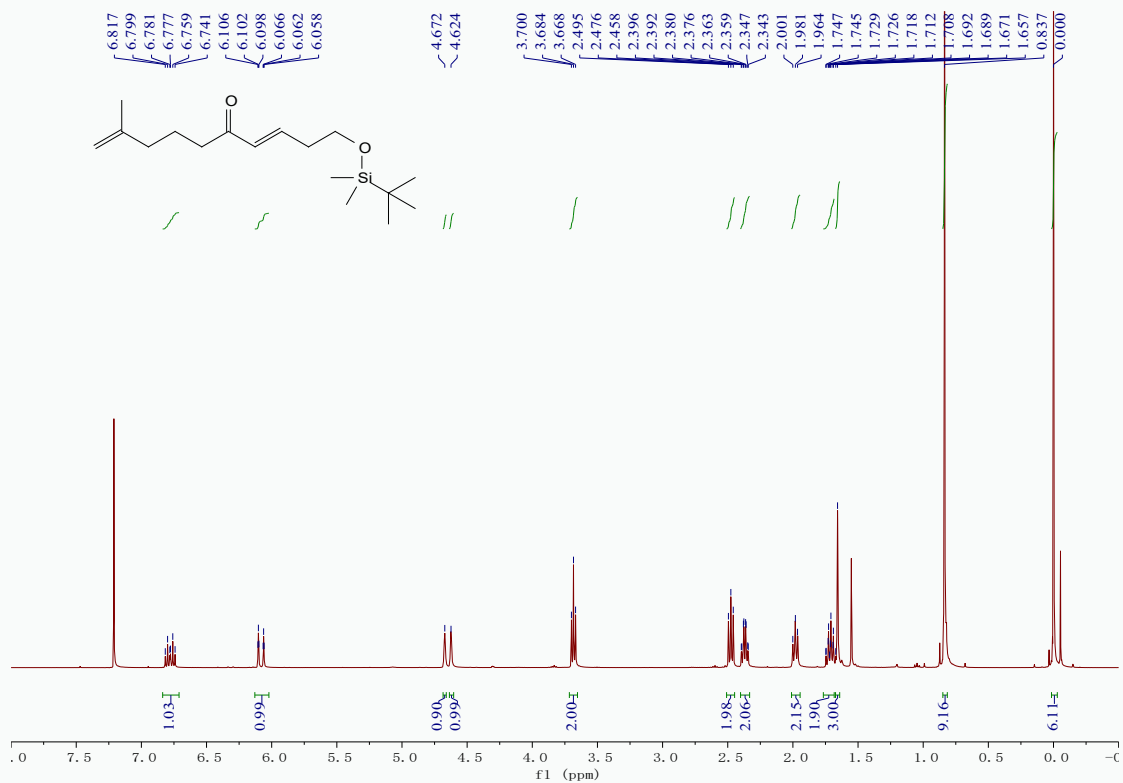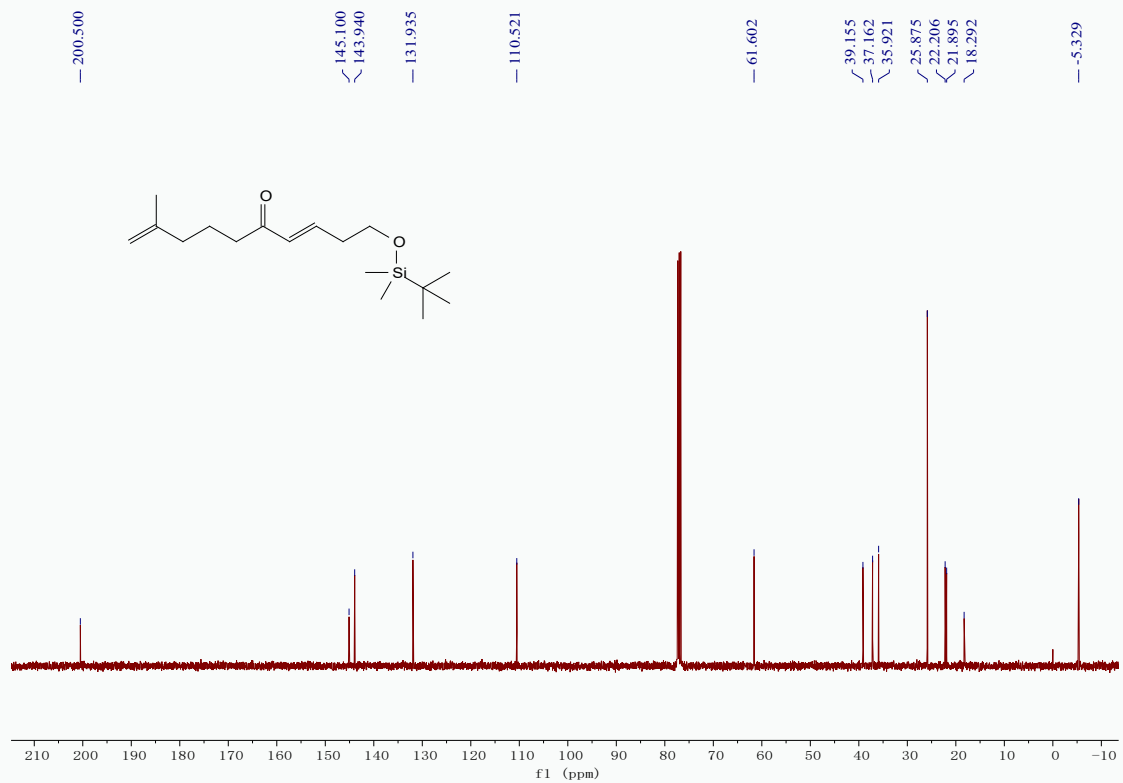

methyl (*E*)-10-methyl-6-oxoundeca-4,10-dienoate (**2f**) (Using CDCl<sub>3</sub> as solvent)

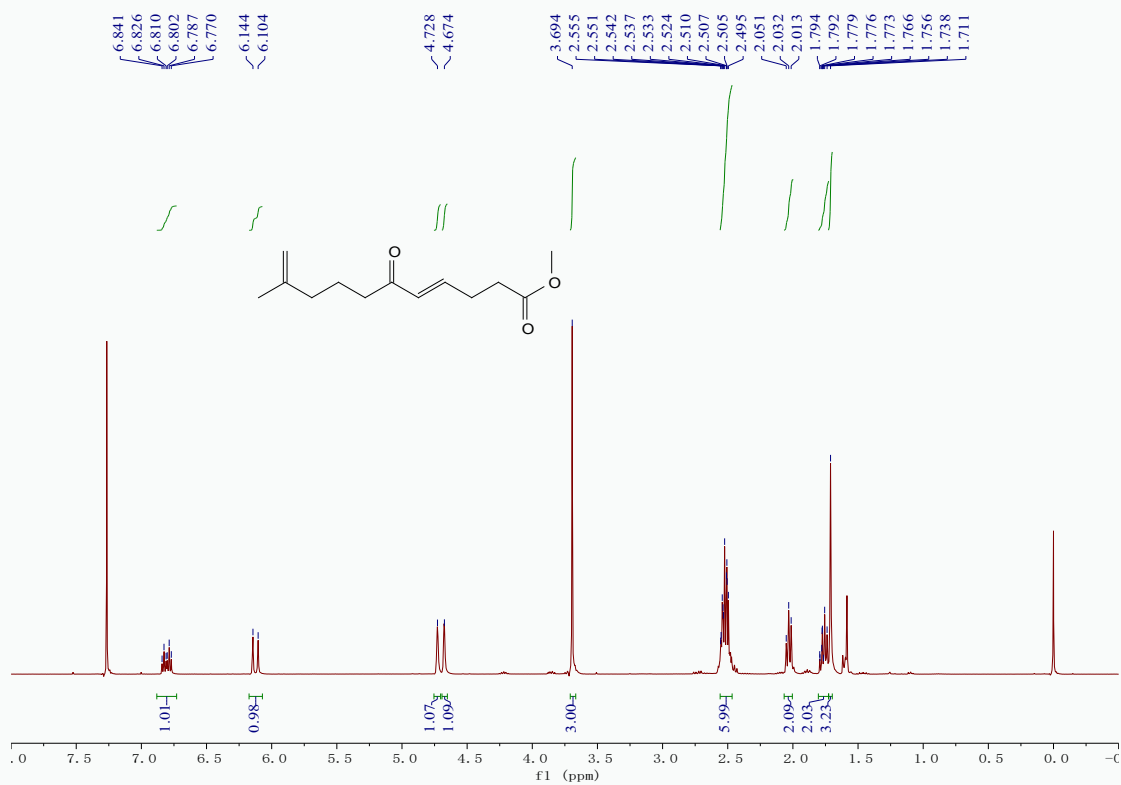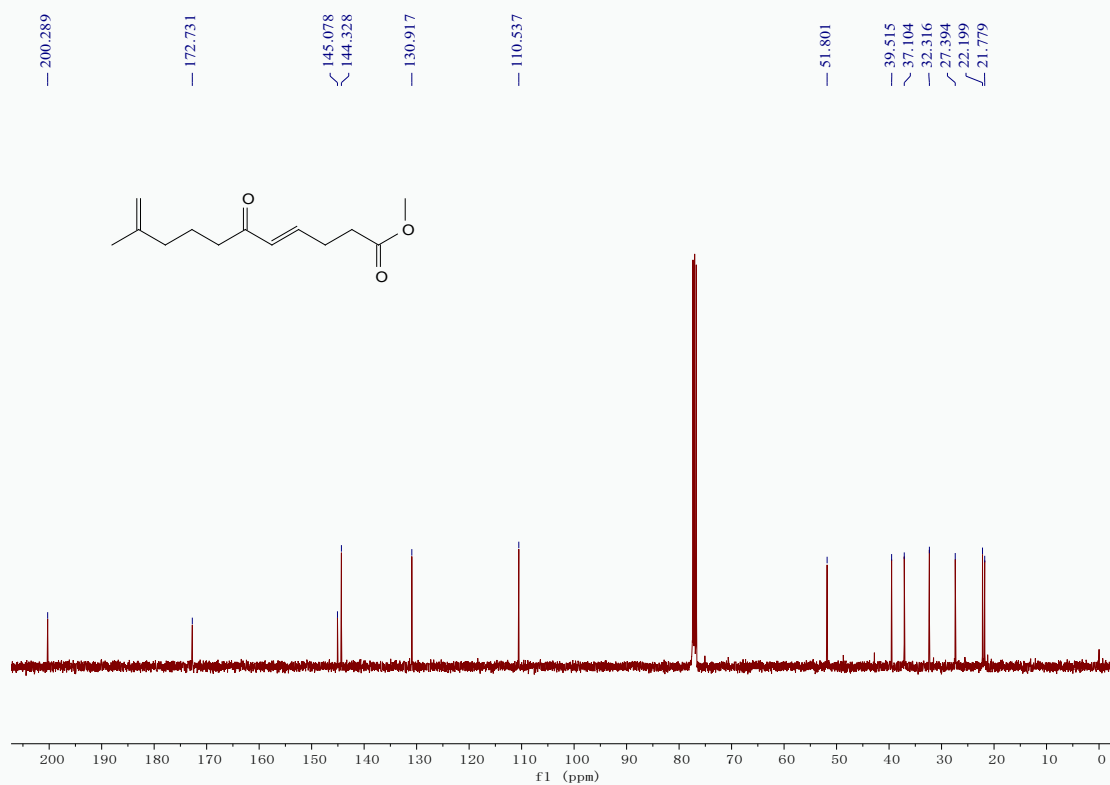

(E)-9-methyl-2-phenyldeca-3,9-dien-5-one (2g) (Using CDCl<sub>3</sub> as solvent)

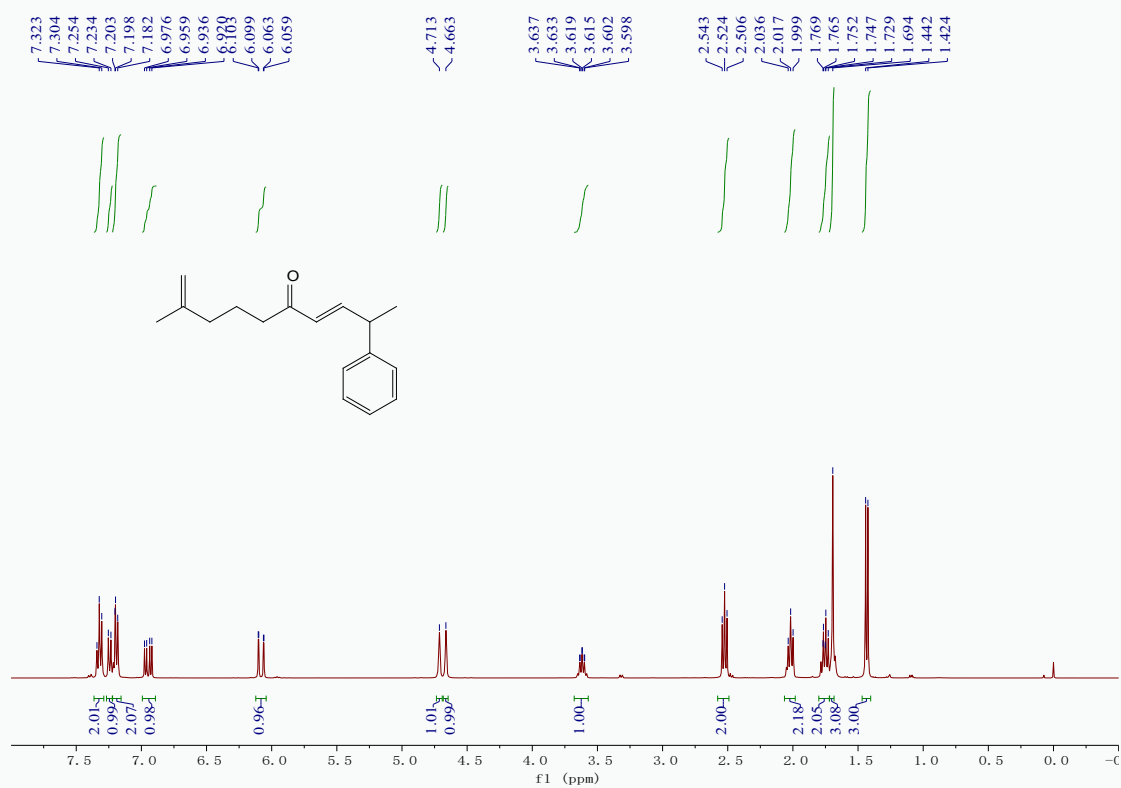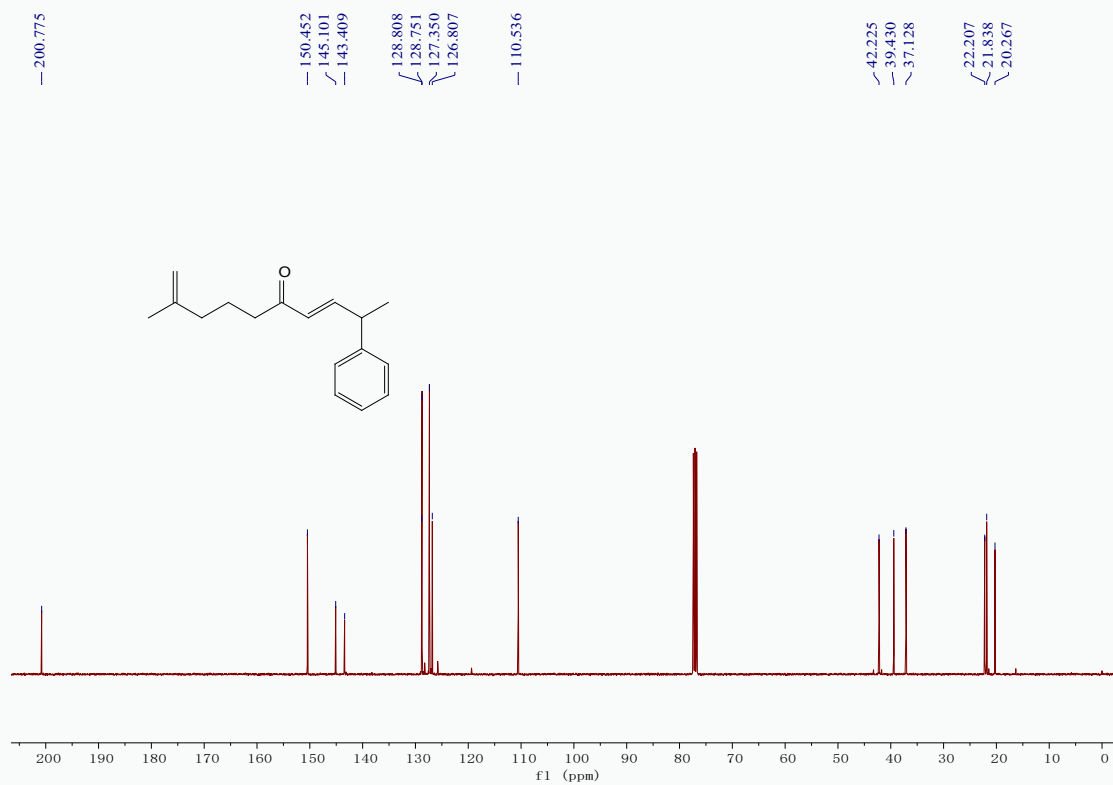

(E)-7-methyl-1-phenylocta-1,7-dien-3-one (**2h**) (Using CDCl<sub>3</sub> as solvent)

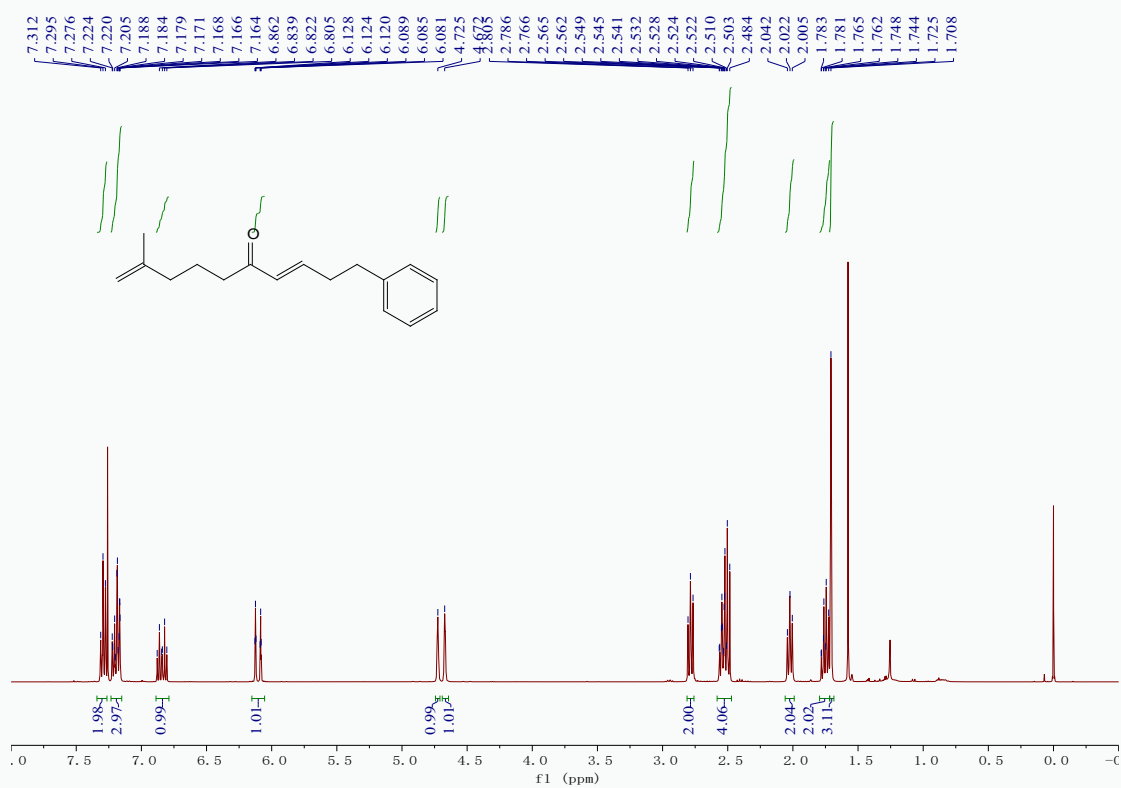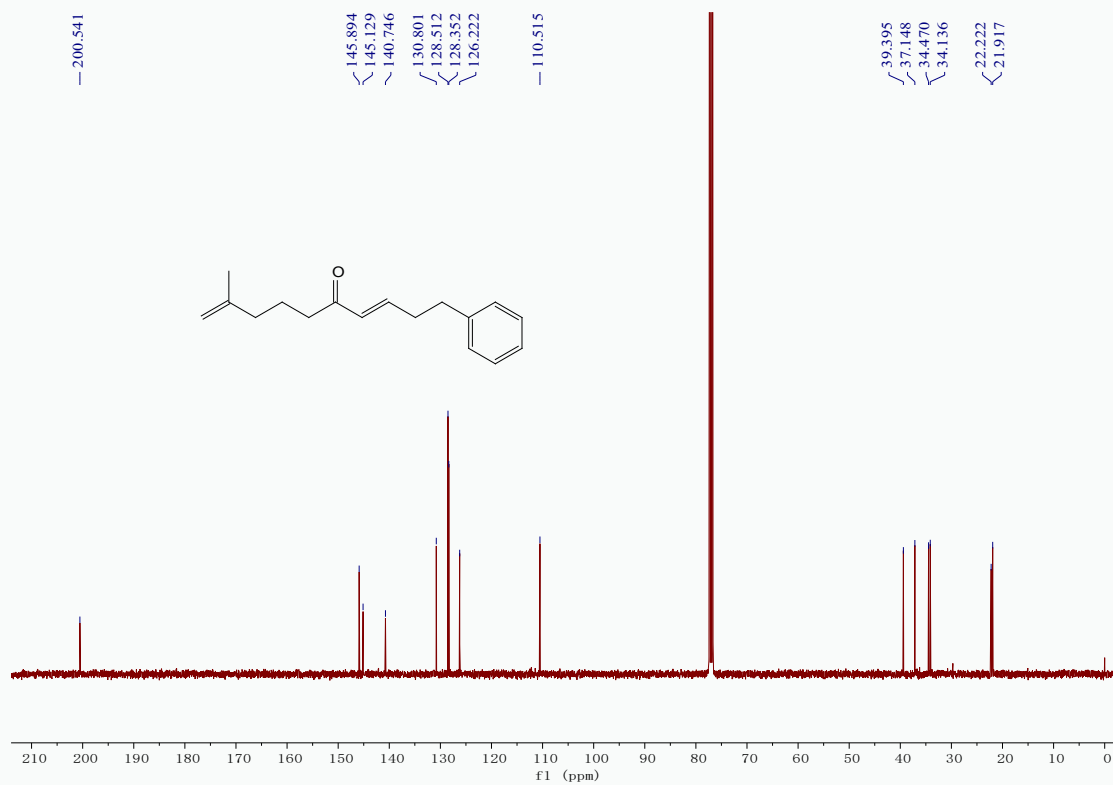



*(E)*-1-((1*R*, 3*S*)-3-acetyl-2, 2-dimethylcyclobutyl)-8-methylnona-2,8-dien-4-one (**2i**) (Using CDCl<sub>3</sub> as solvent)

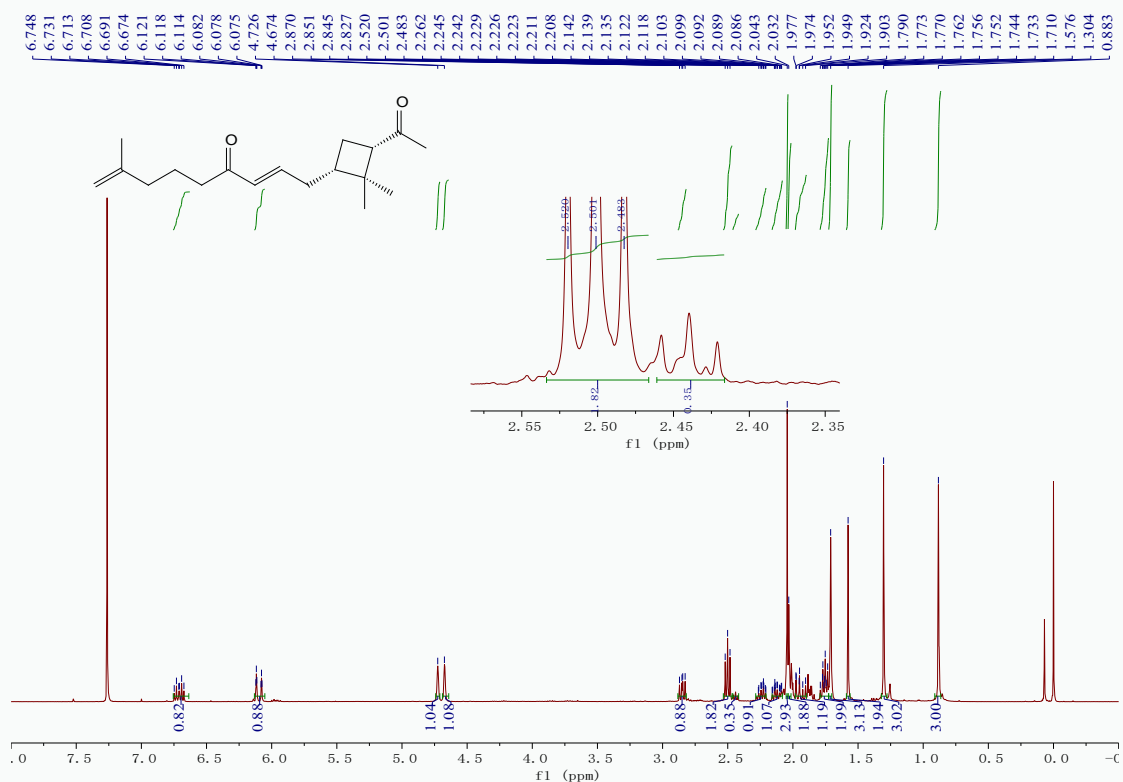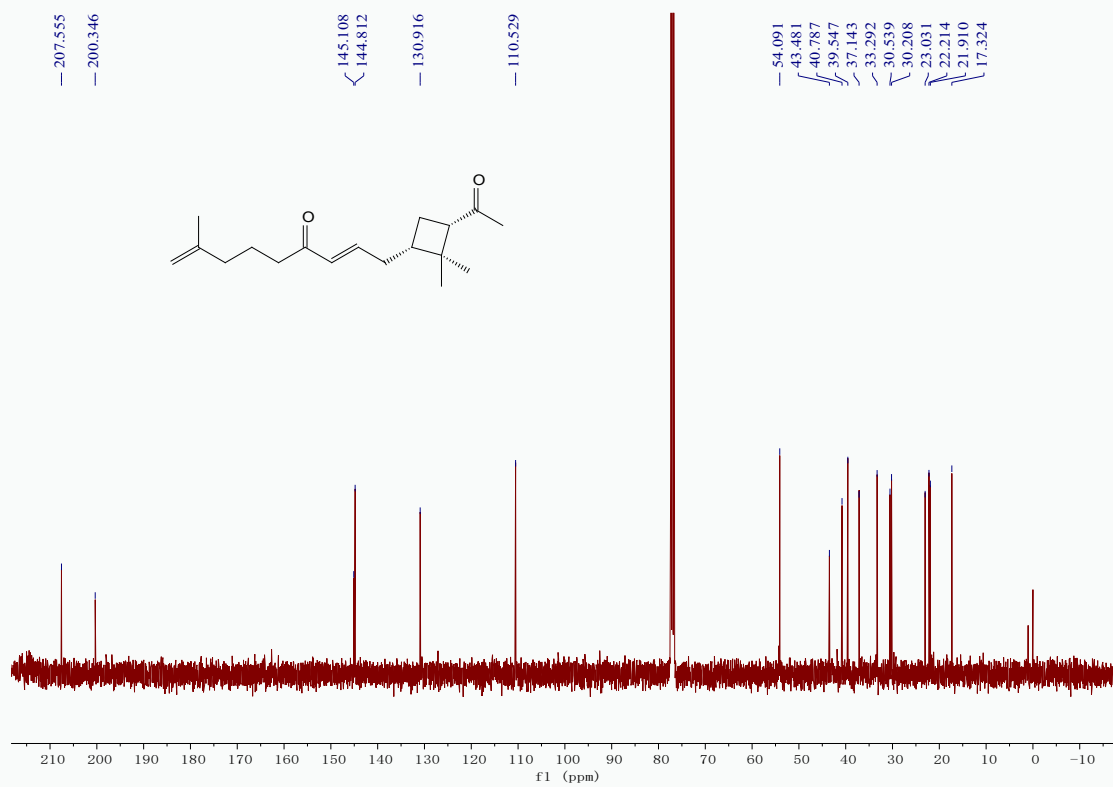

(E)-1-cyclopentyl-7-methylocta-1,7-dien-3-one (**2j**) (Using CDCl<sub>3</sub> as solvent)

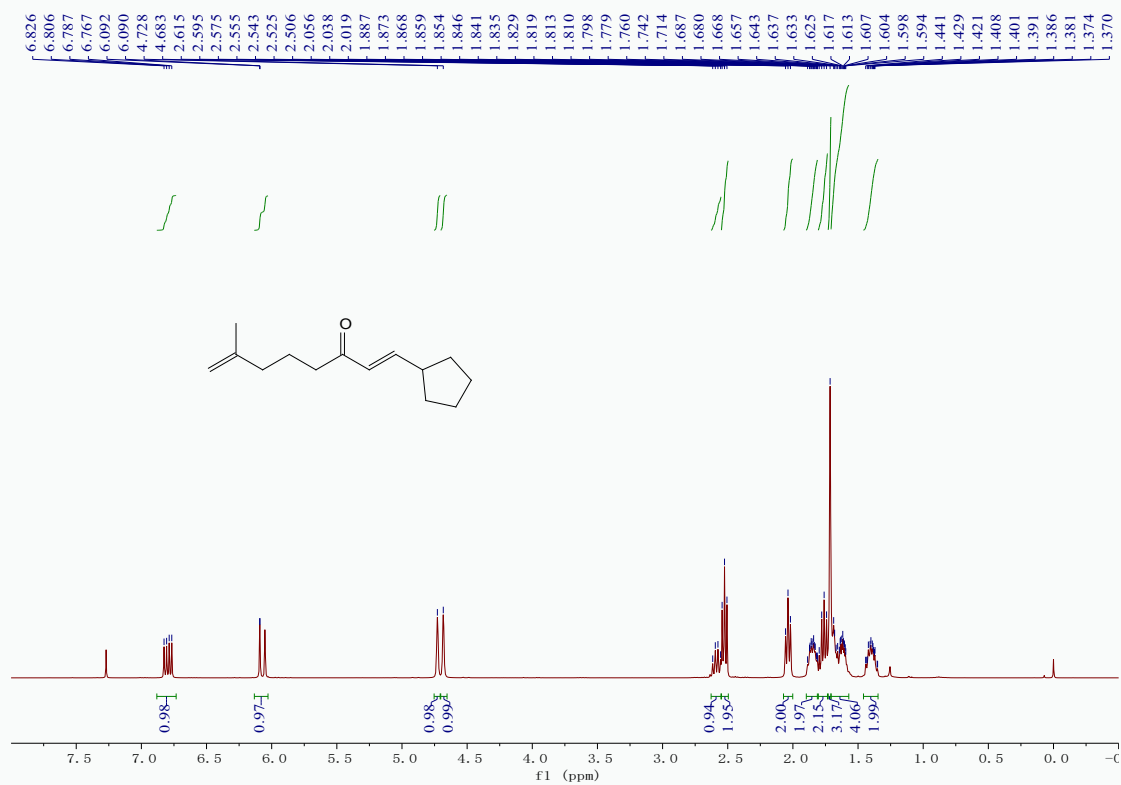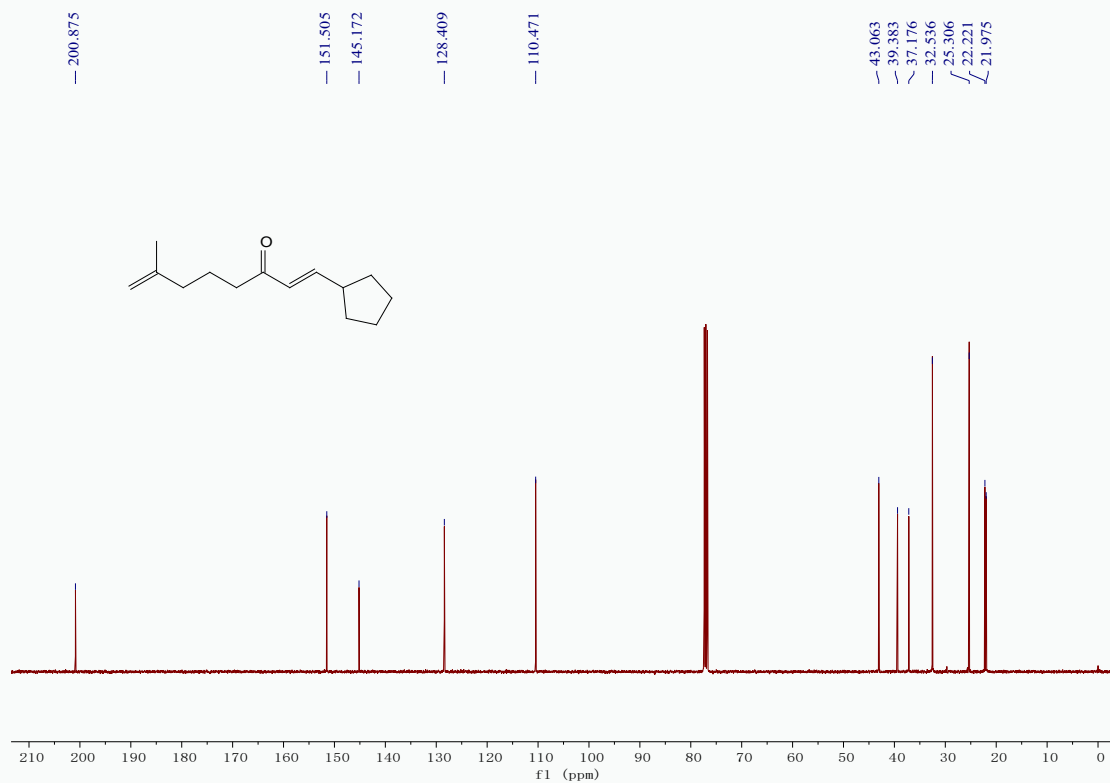

*(E)*-1-(4-((methoxymethoxy)methyl)-2,2-dimethyl-1,3-dioxolan-4-yl)-7-methylocta-1,7-dien-3-one (**2k**) (Using CDCl<sub>3</sub> as solvent)

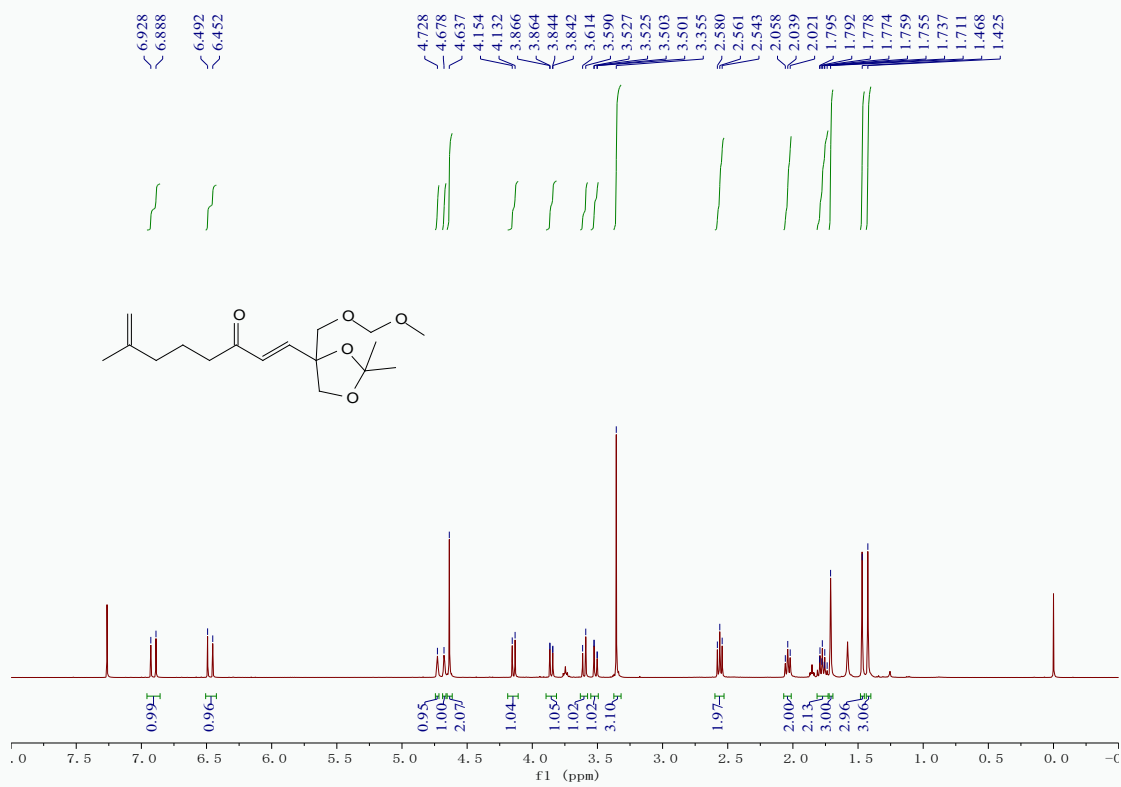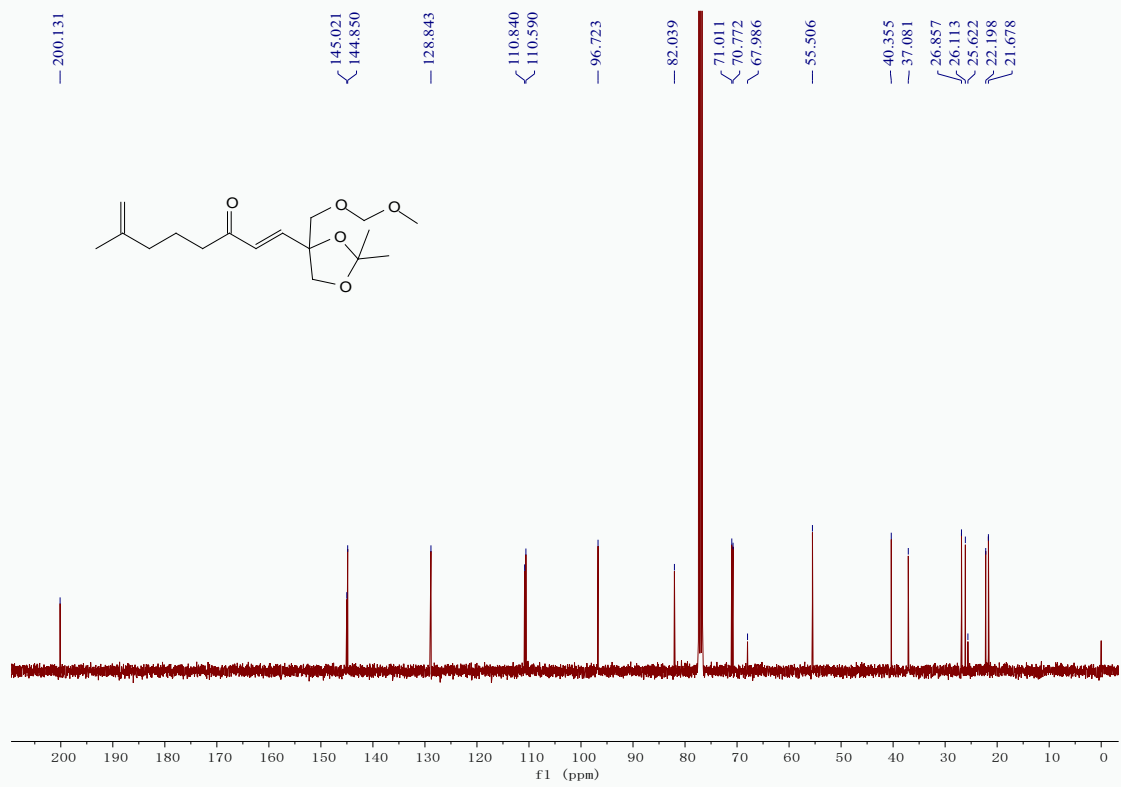

(E)-1-cyclohexyl-7-methylocta-1,7-dien-3-one (**21**) (Using CDCl<sub>3</sub> as solvent)

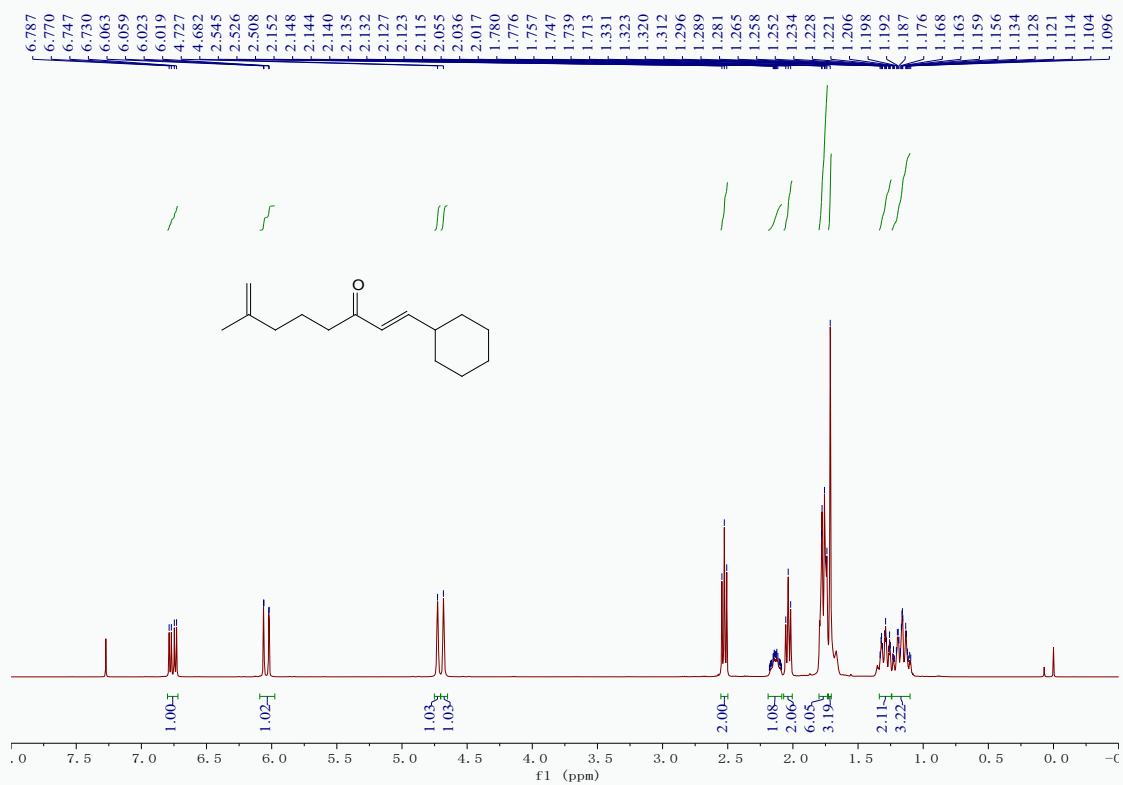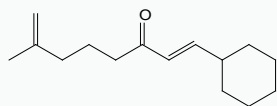

— 201.091

— 152.205

— 145.159

— 127.848

— 110.474

— 40.599

— 39.344

— 37.170

— 31.798

— 25.926

— 25.723

— 22.214

— 21.983

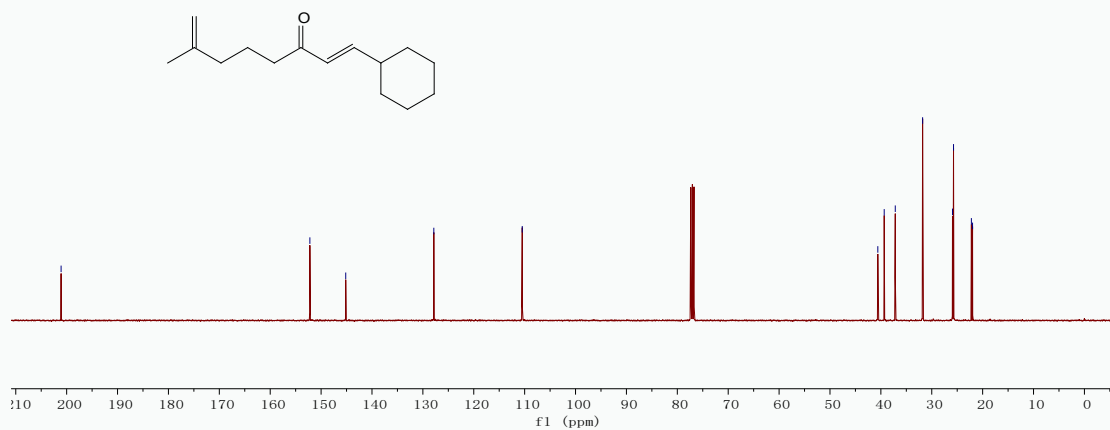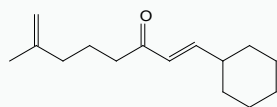

(E)-2-methyl-2-((2-methylallyl)oxy)hept-4-en-3-one (**2m**) (Using CDCl<sub>3</sub> as solvent)

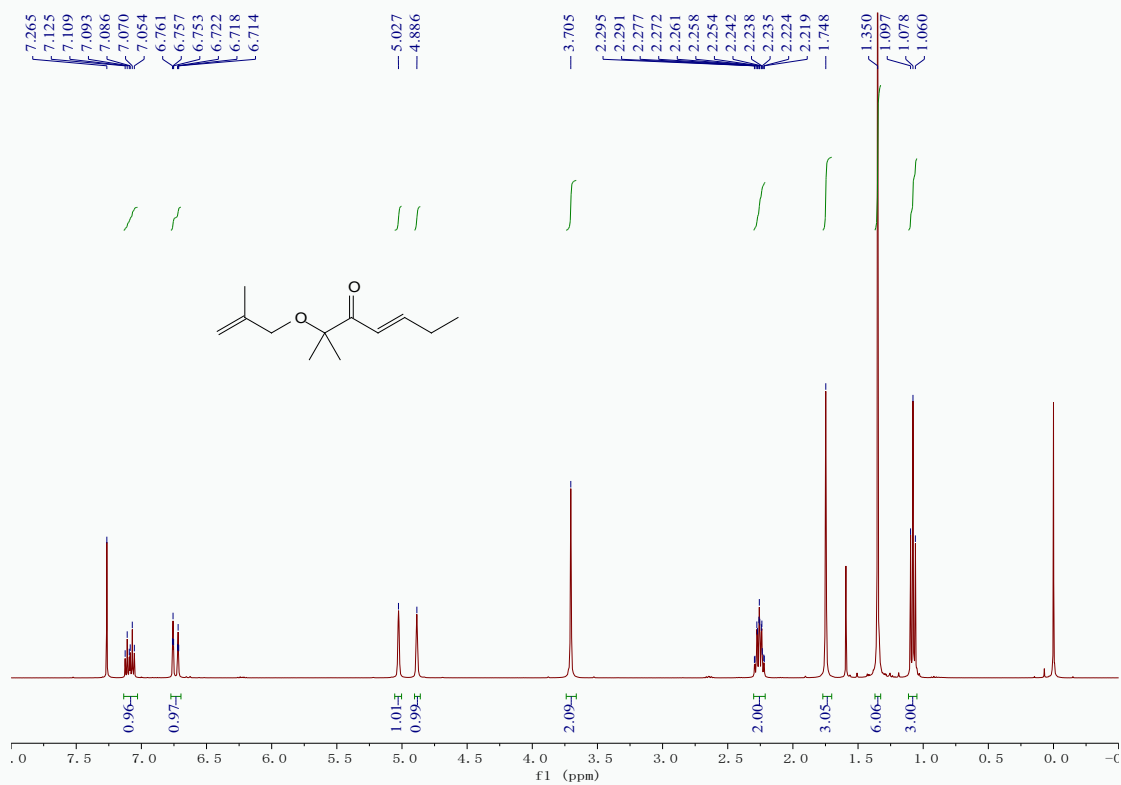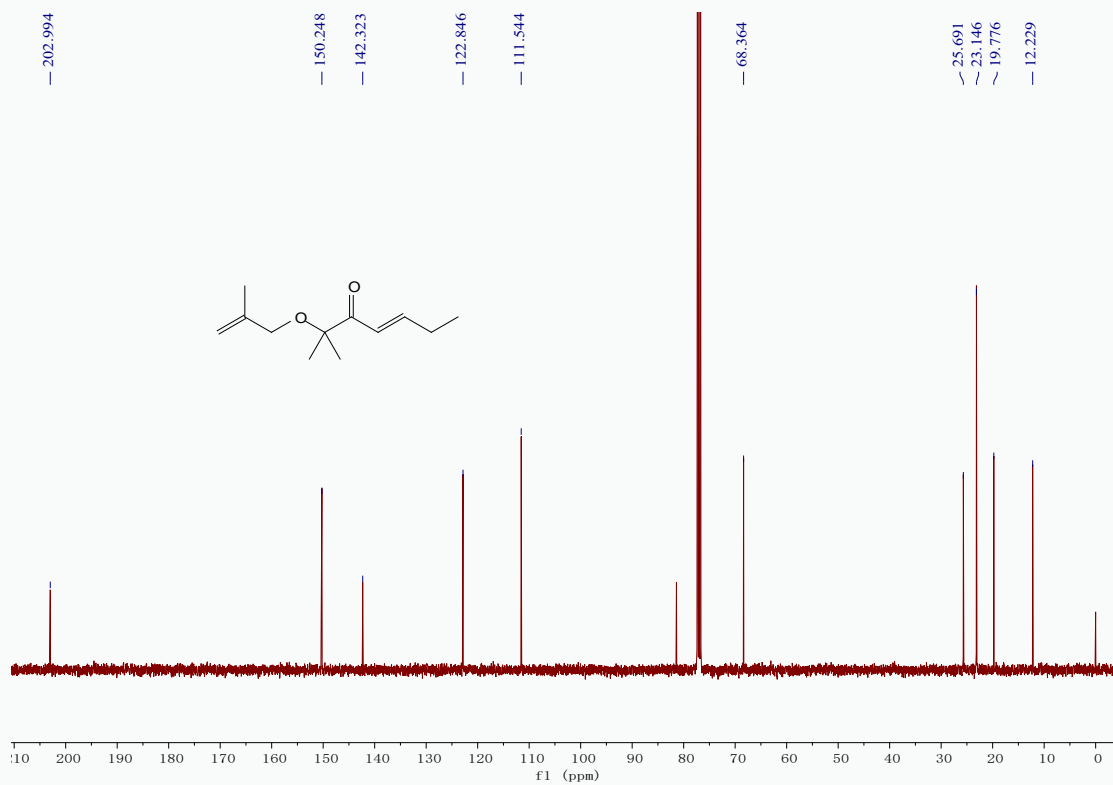

(E)-1-(1-(3-methylbut-3-en-1-yl)cyclohexyl)pent-2-en-1-one (**2n**) (Using CDCl<sub>3</sub> as solvent)

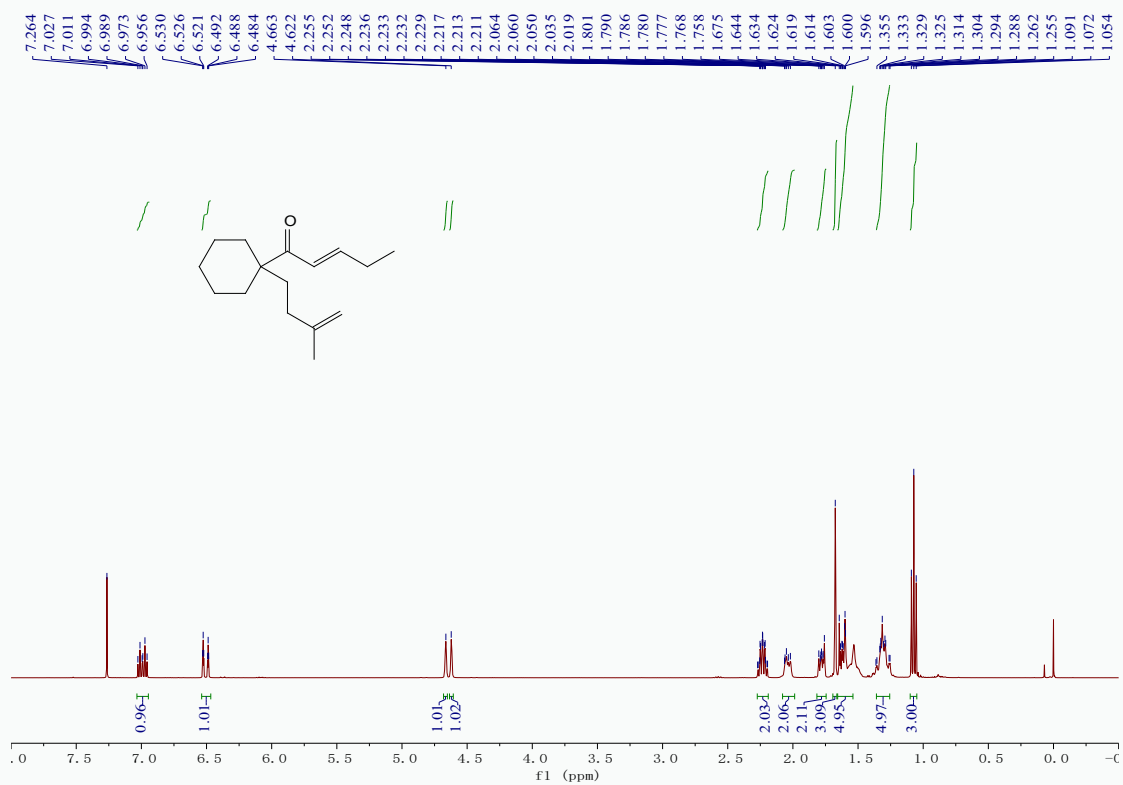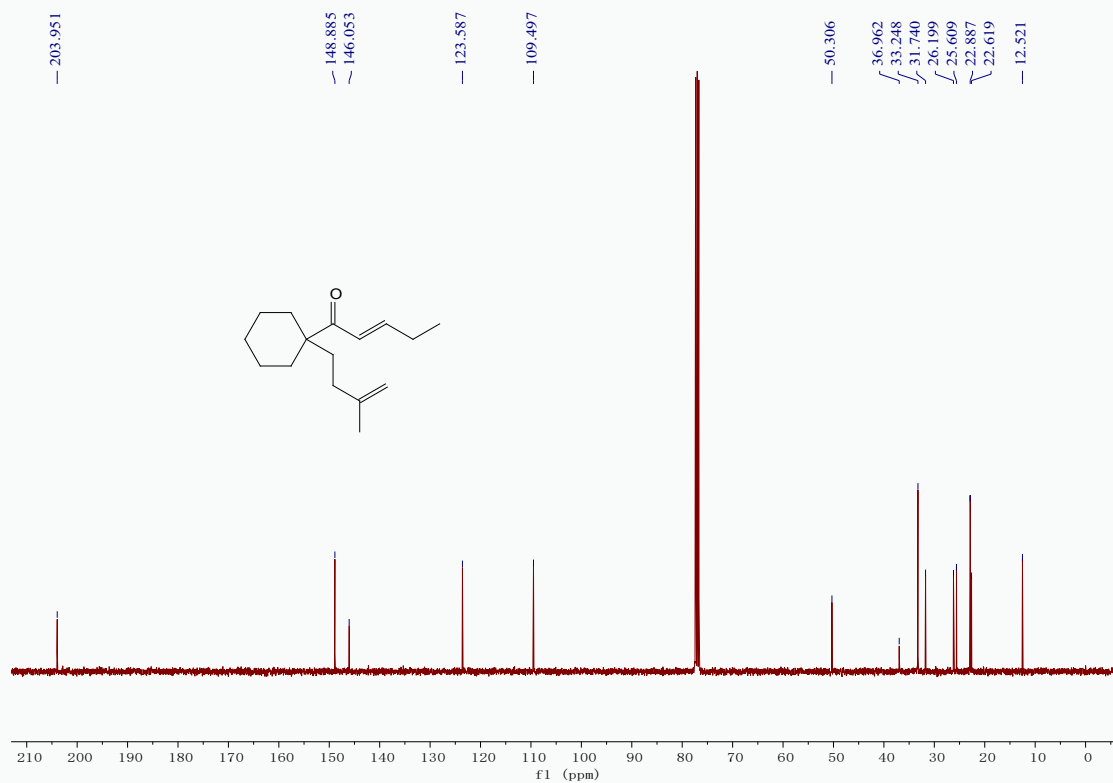

(E)-1-(cyclohex-1-en-1-yl)oct-5-en-4-one (**2o**) (Using CDCl<sub>3</sub> as solvent)

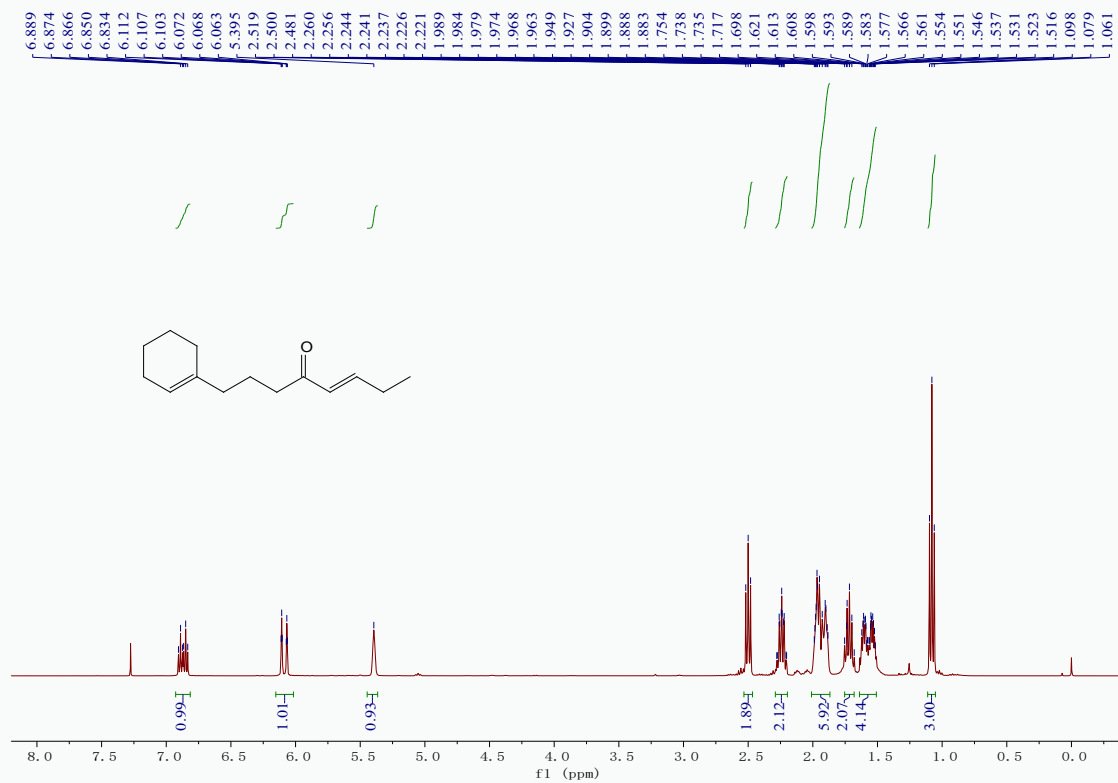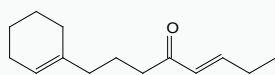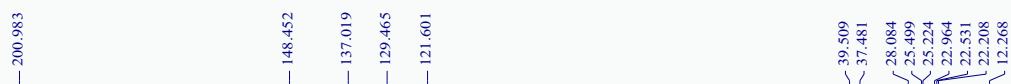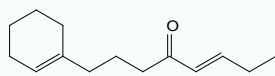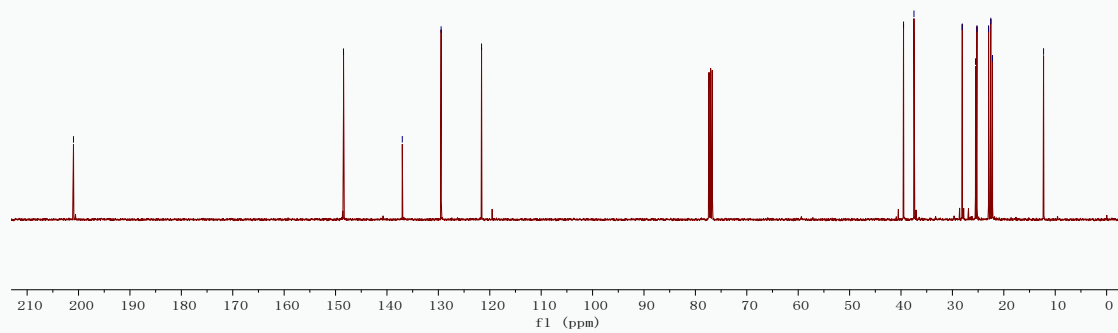

2,8-dimethylnona-2,8-dien-4-one (**2p**) (Using CDCl<sub>3</sub> as solvent)

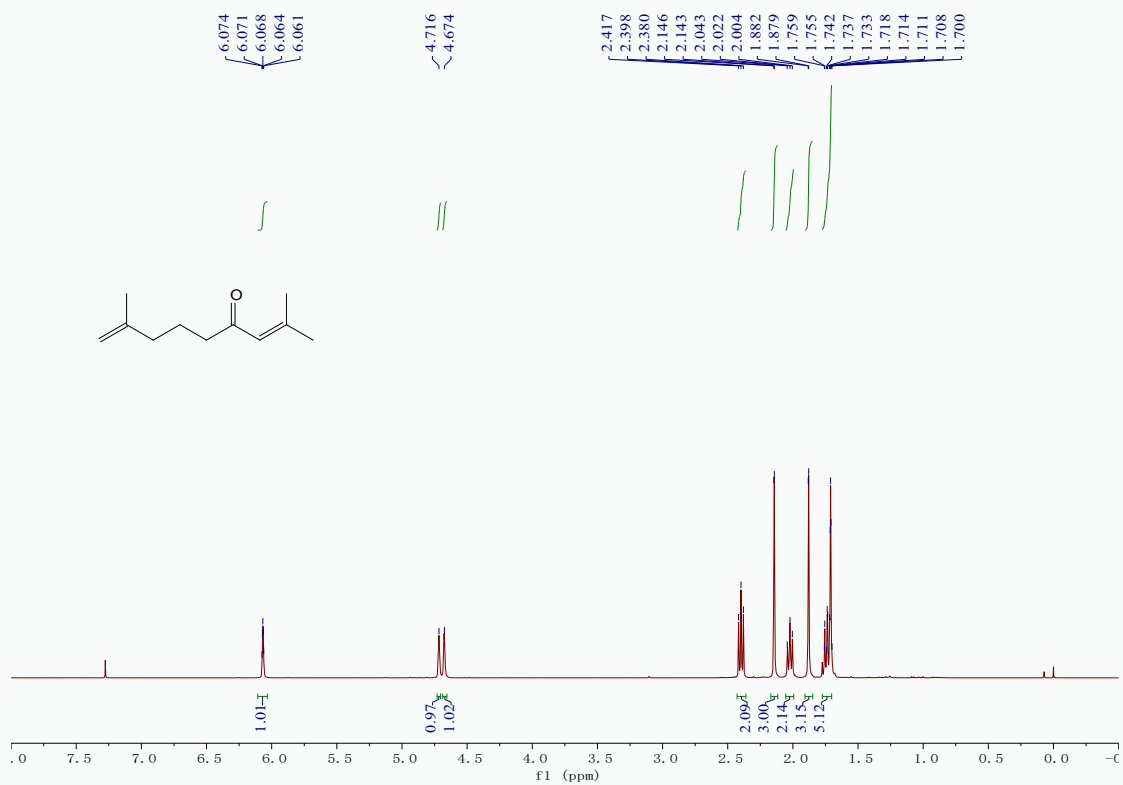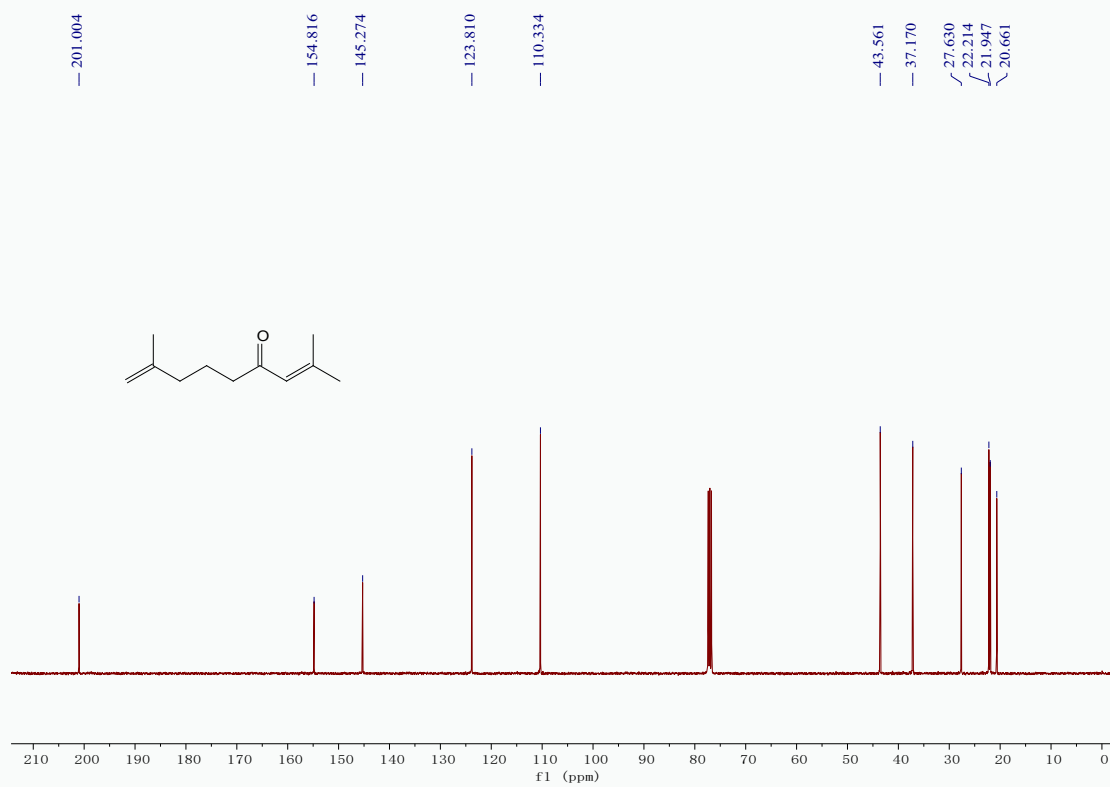



2,9-dimethyl-8-methylenedec-2-en-4-one (**2q**) (Using CDCl<sub>3</sub> as solvent)

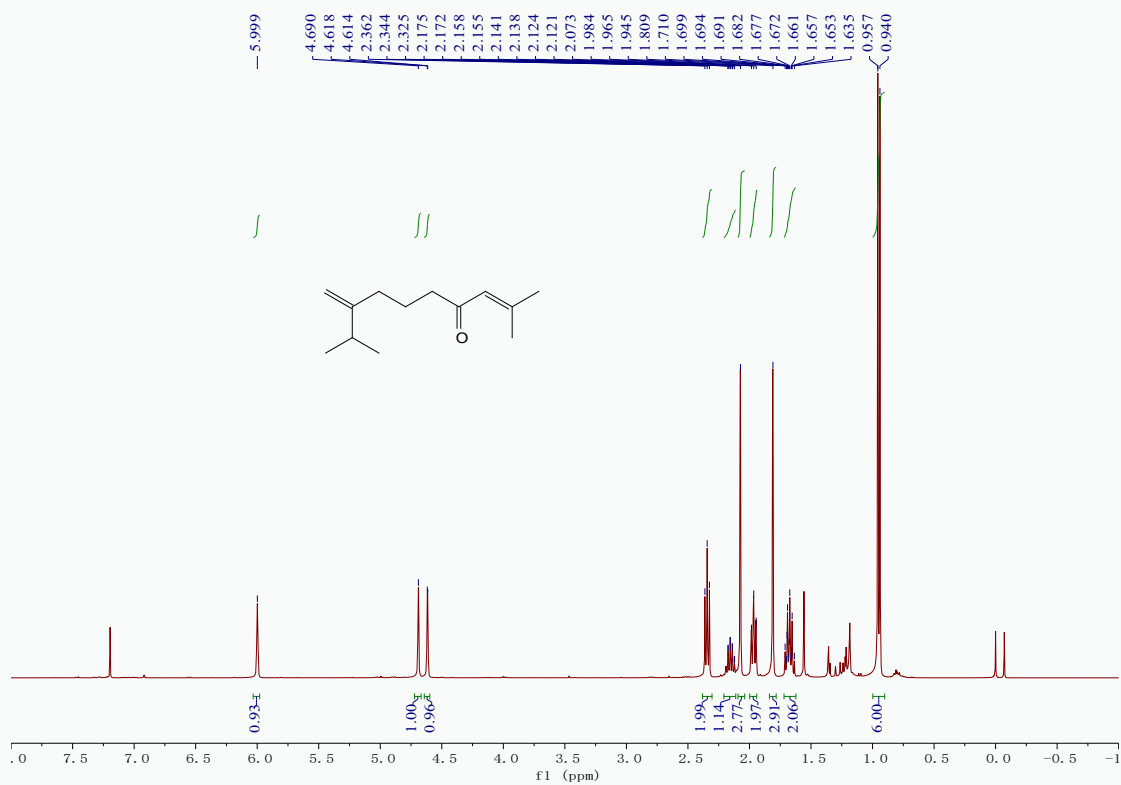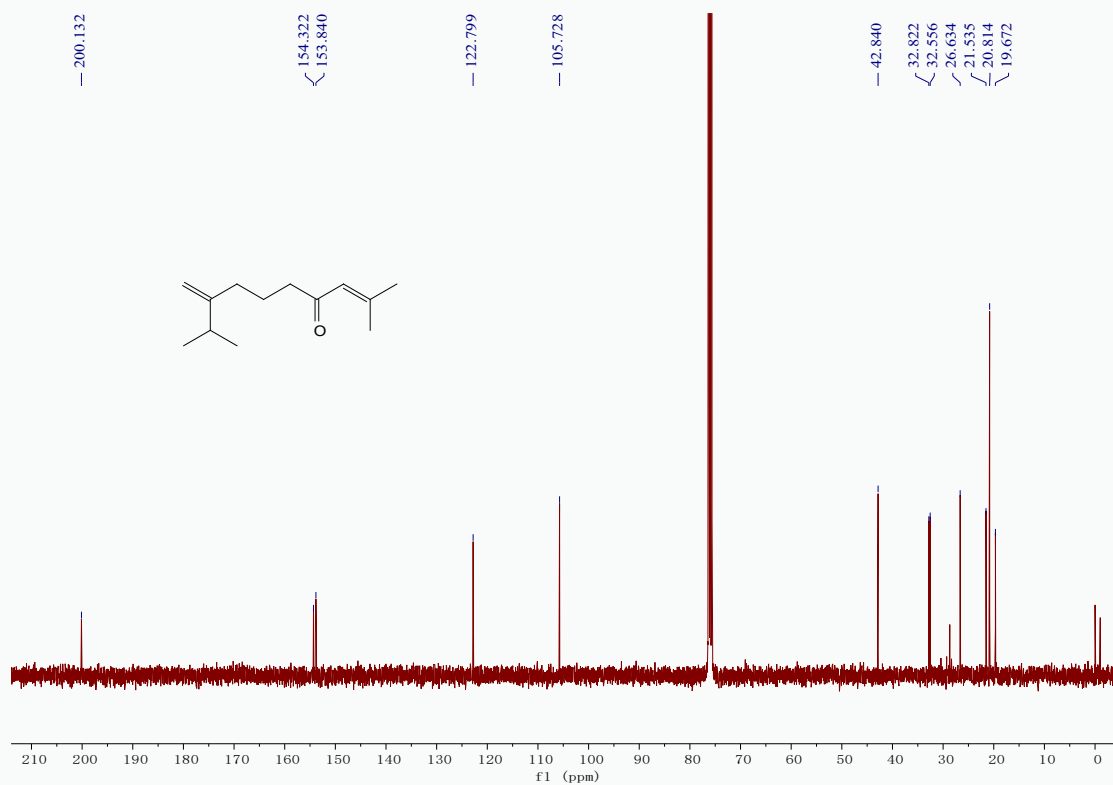

1-cyclohexylidene-6-methylhept-6-en-2-one (**2r**) (Using CDCl<sub>3</sub> as solvent)

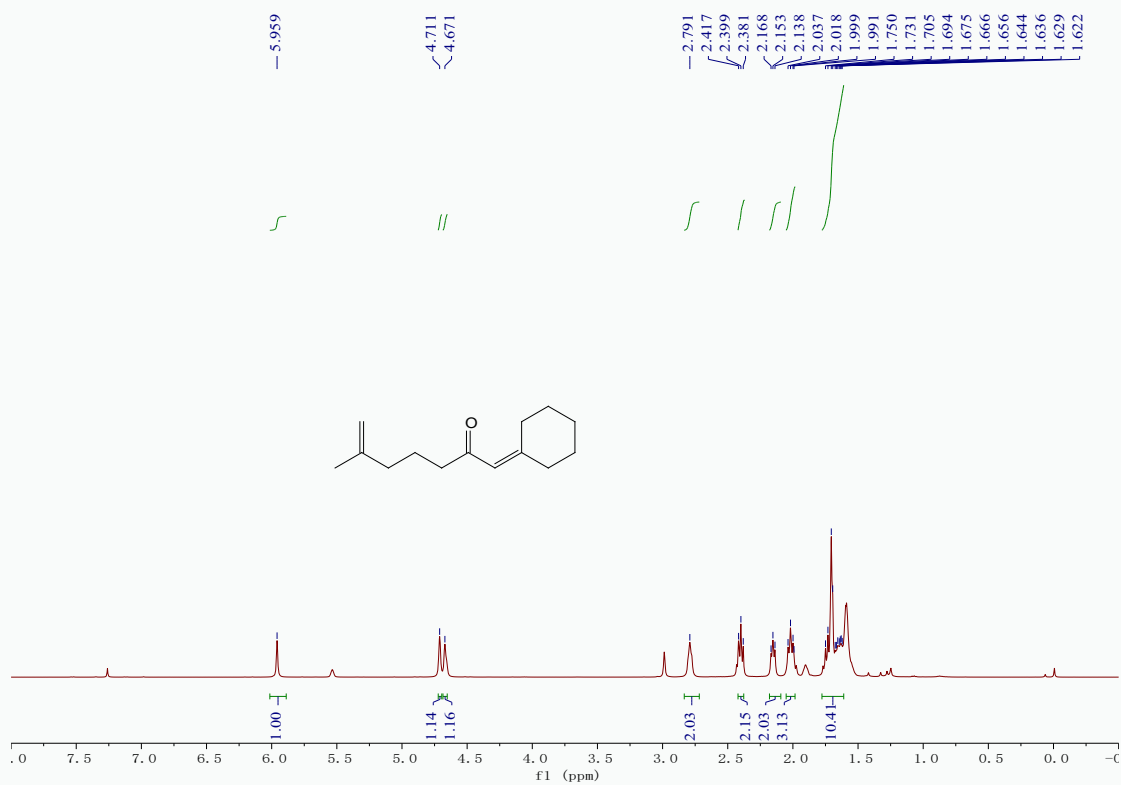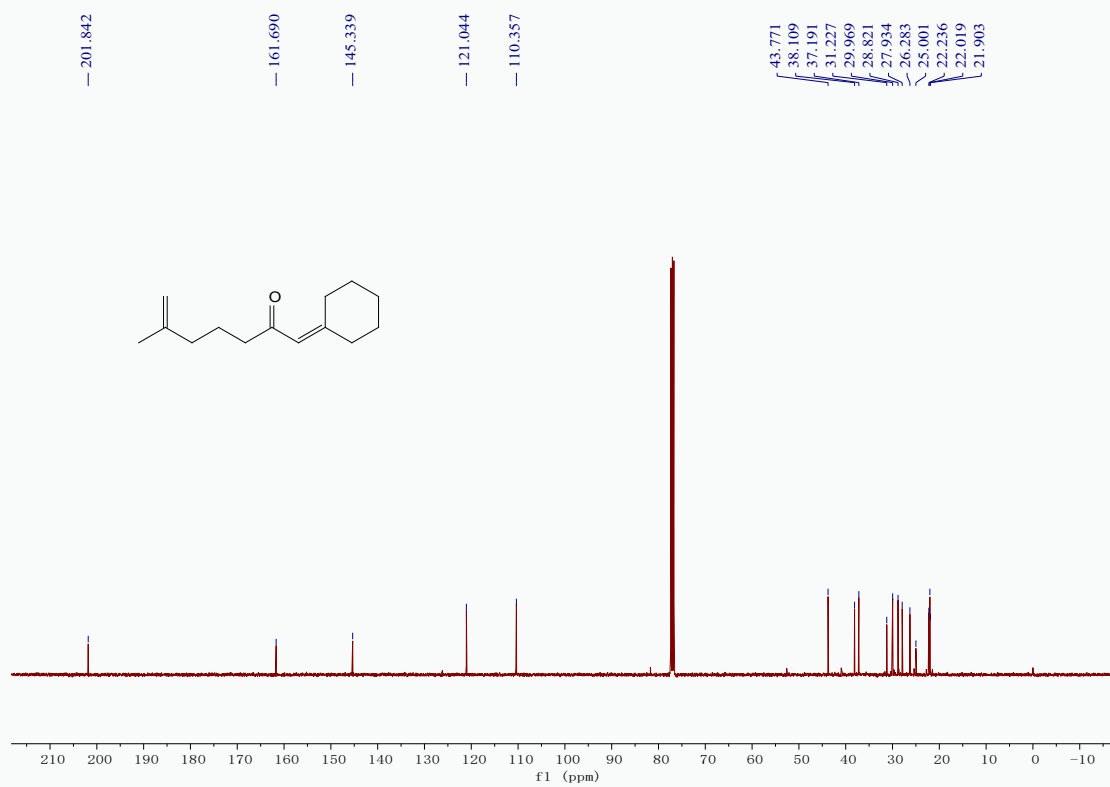

(*E*)-2,8,8-trimethylnona-1,6-dien-5-one (**2s**) (Using CDCl<sub>3</sub> as solvent)

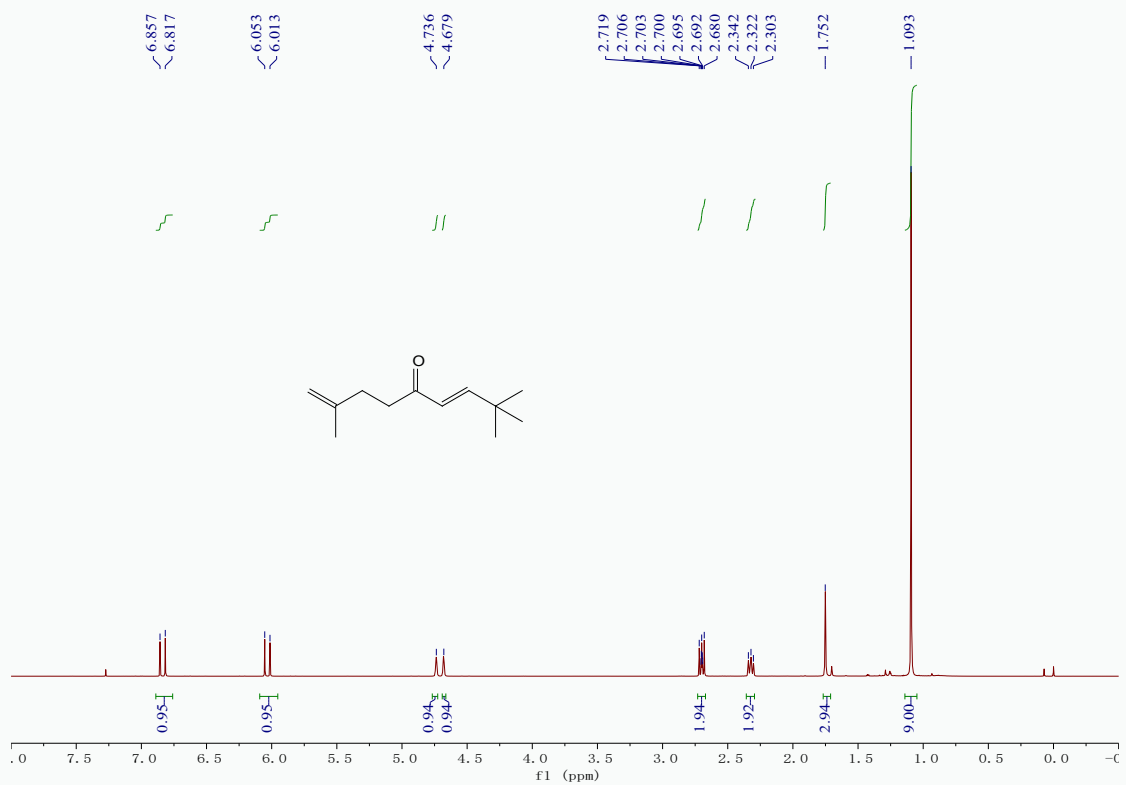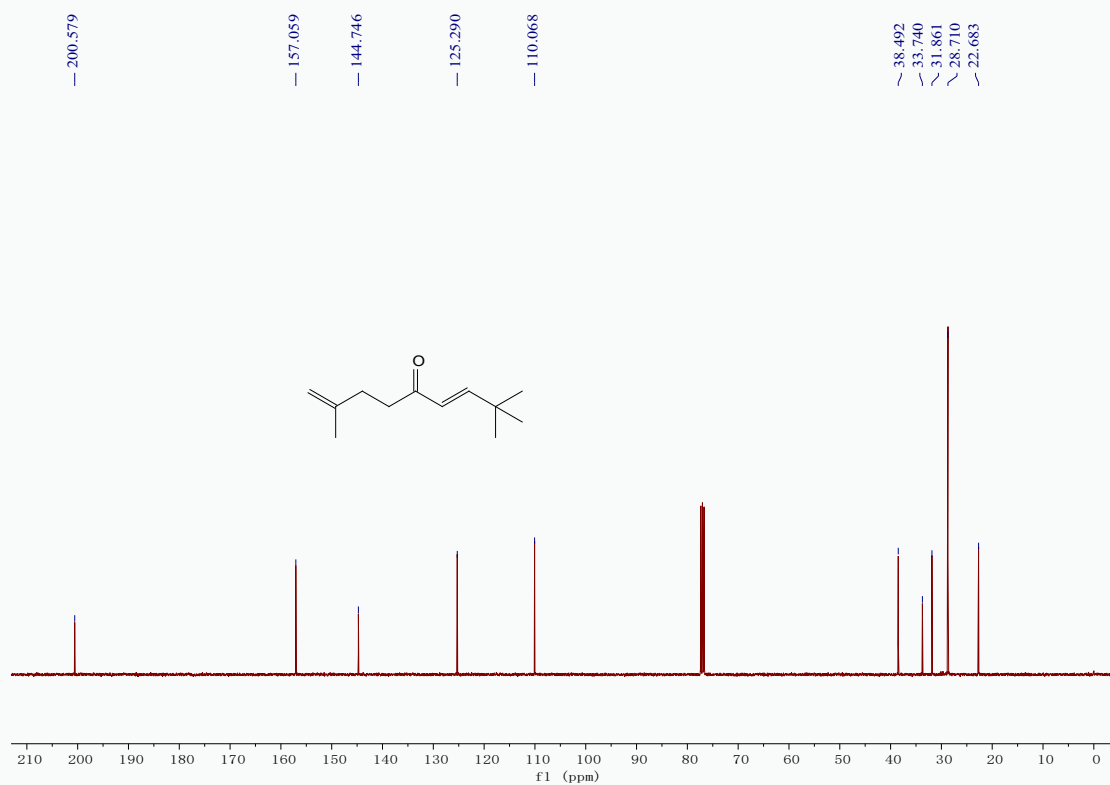

(*E*)-7-methyl-1-((2*S*, 3*aS*, 5*R*)-octahydro-7*aH*-2,5-methanoinden-7*a*-yl)octa-1,7-dien-3-one  
**(2t)** (Using CDCl<sub>3</sub> as solvent)

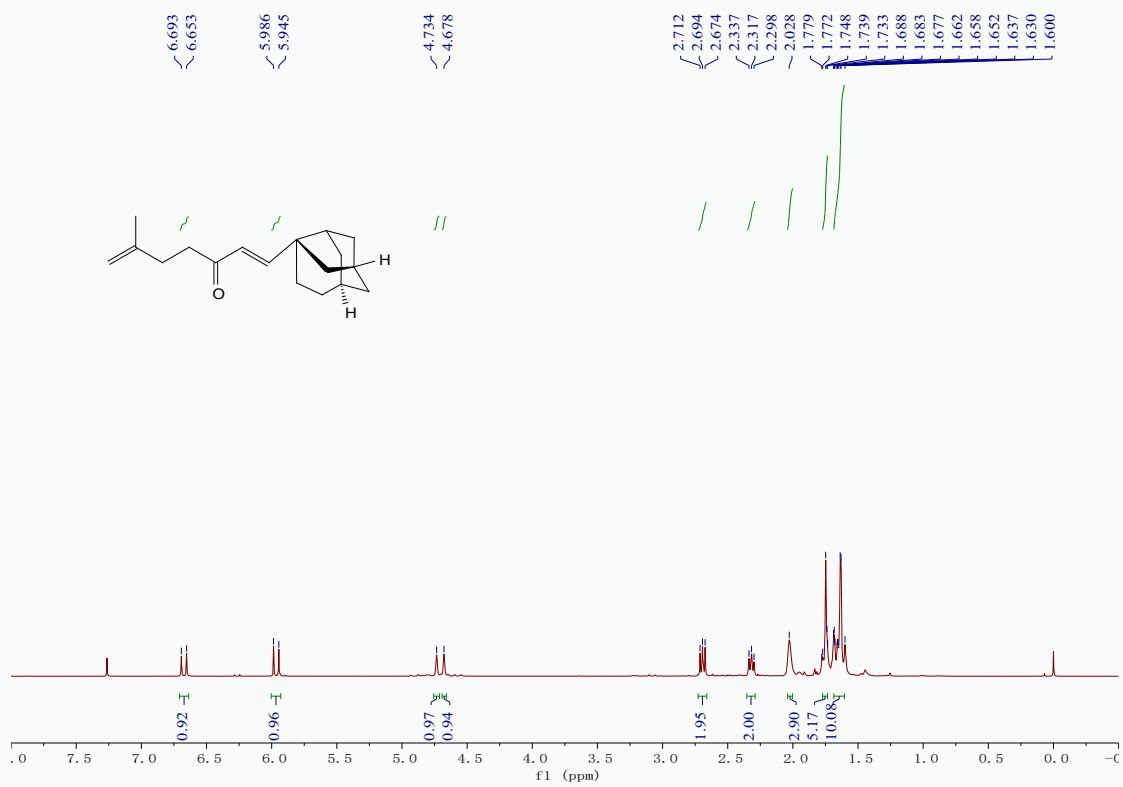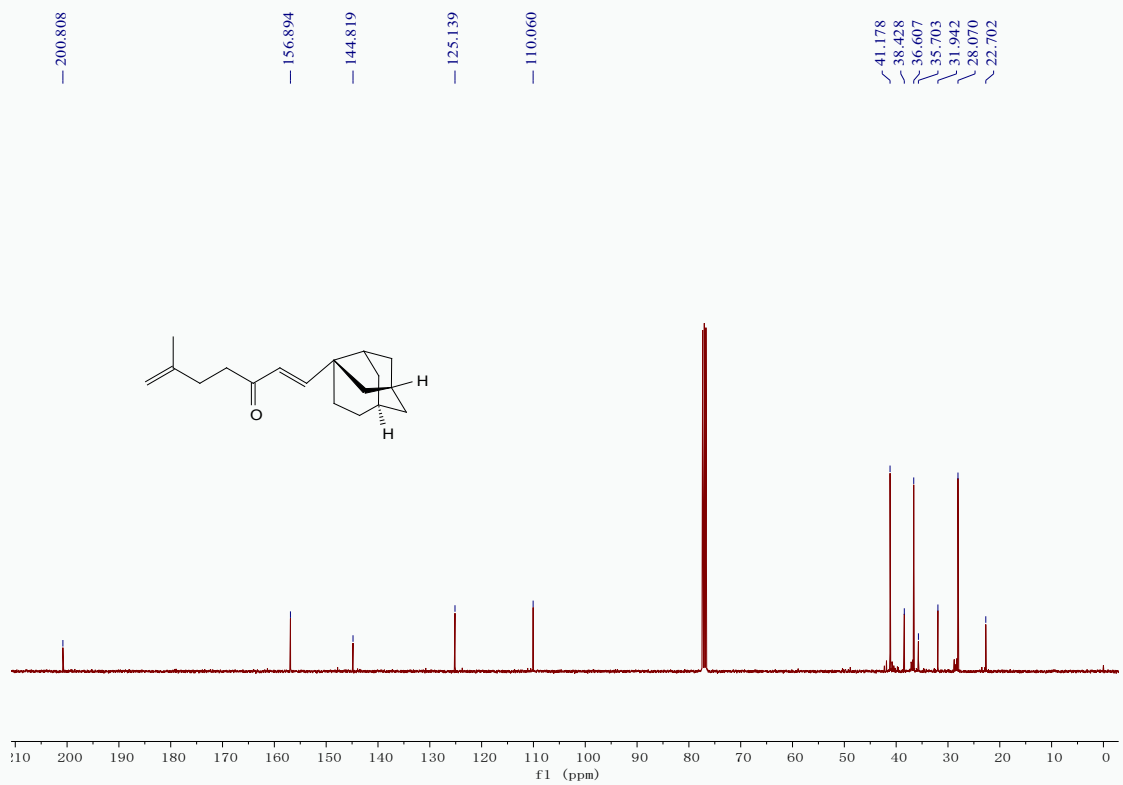

5-bromo-*N*-methoxy-*N*-methylhex-5-enamide (**15**) (Using CDCl<sub>3</sub> as solvent)

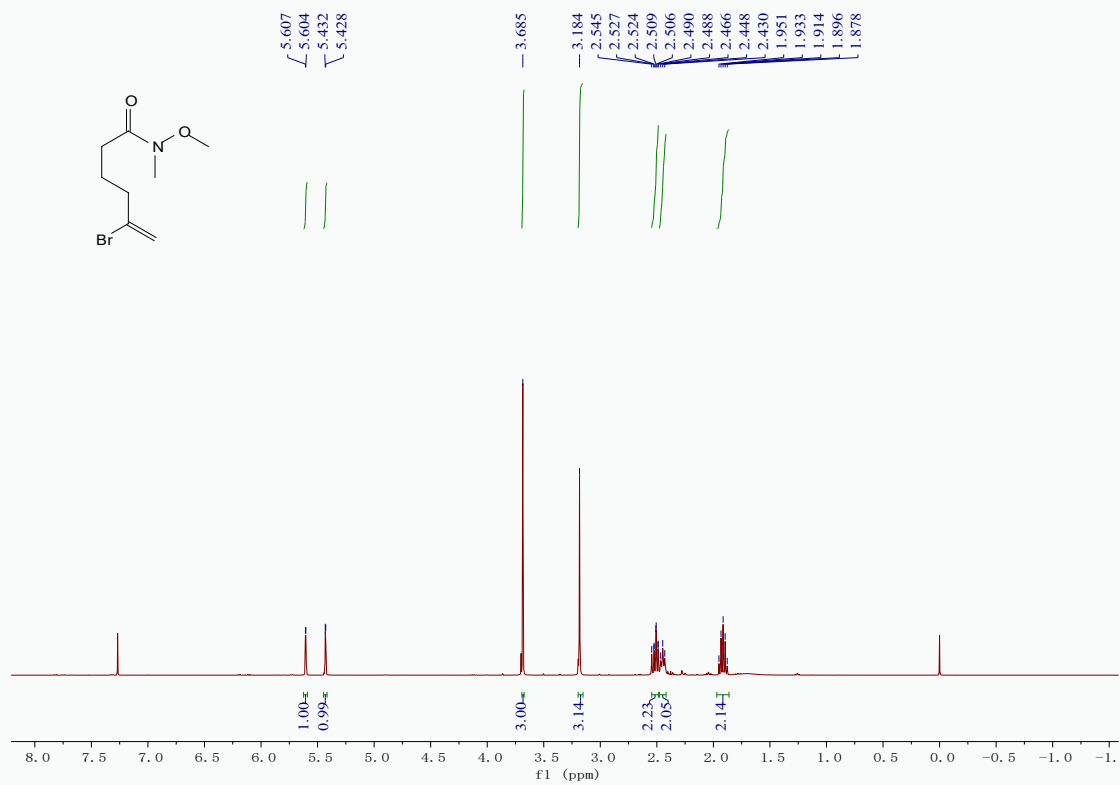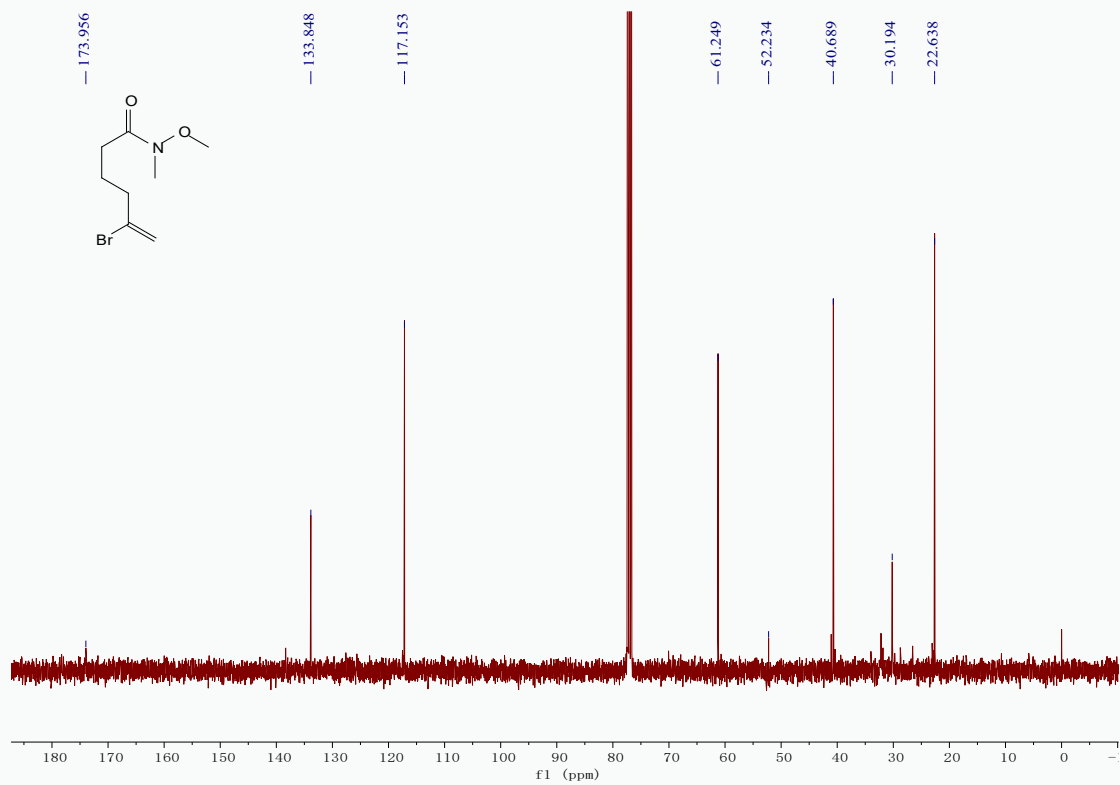

dimethyl (6-bromo-2-oxohept-6-en-1-yl)phosphonate (**16**) (Using CDCl<sub>3</sub> as solvent)

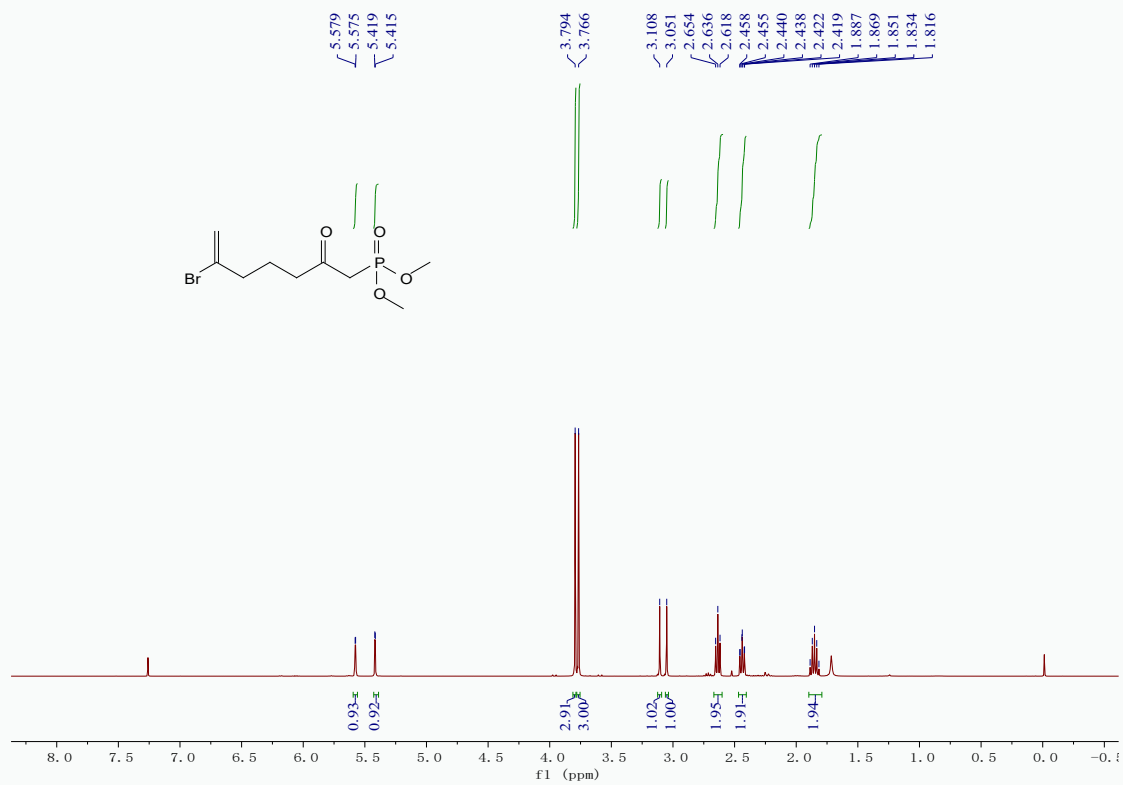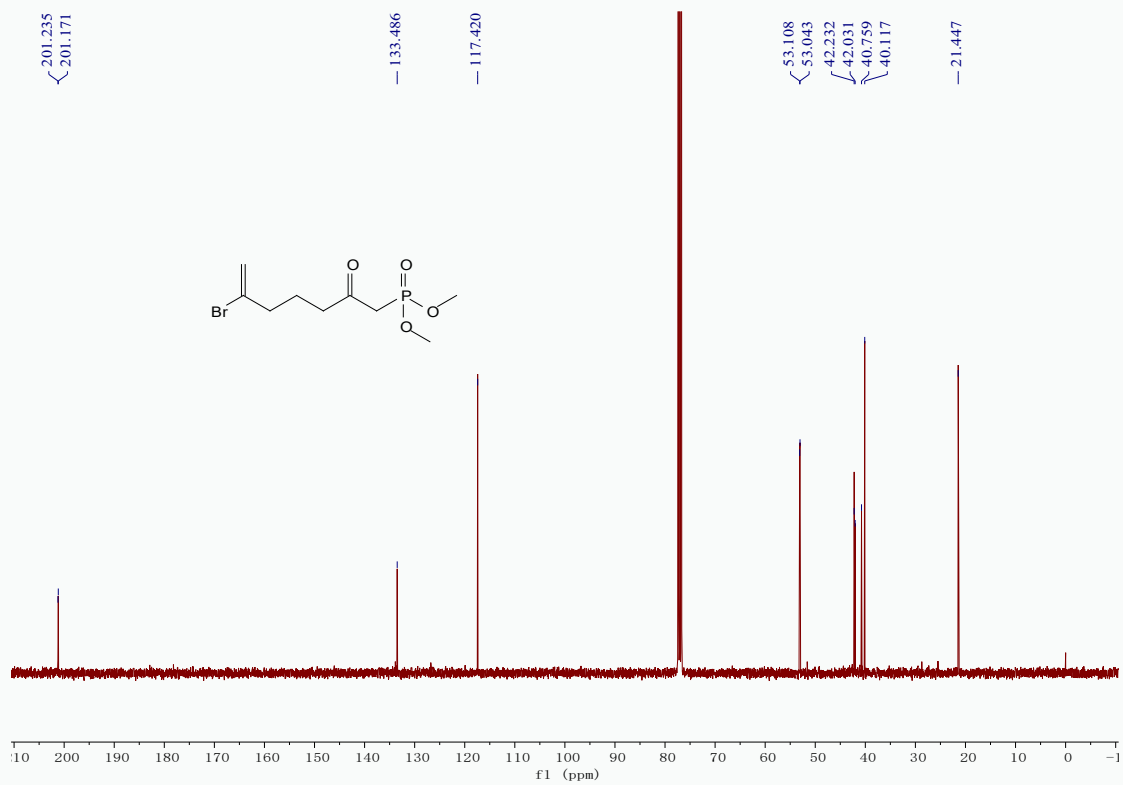

(E)-9-bromodeca-3,9-dien-5-one (**17**) (Using CDCl<sub>3</sub> as solvent)

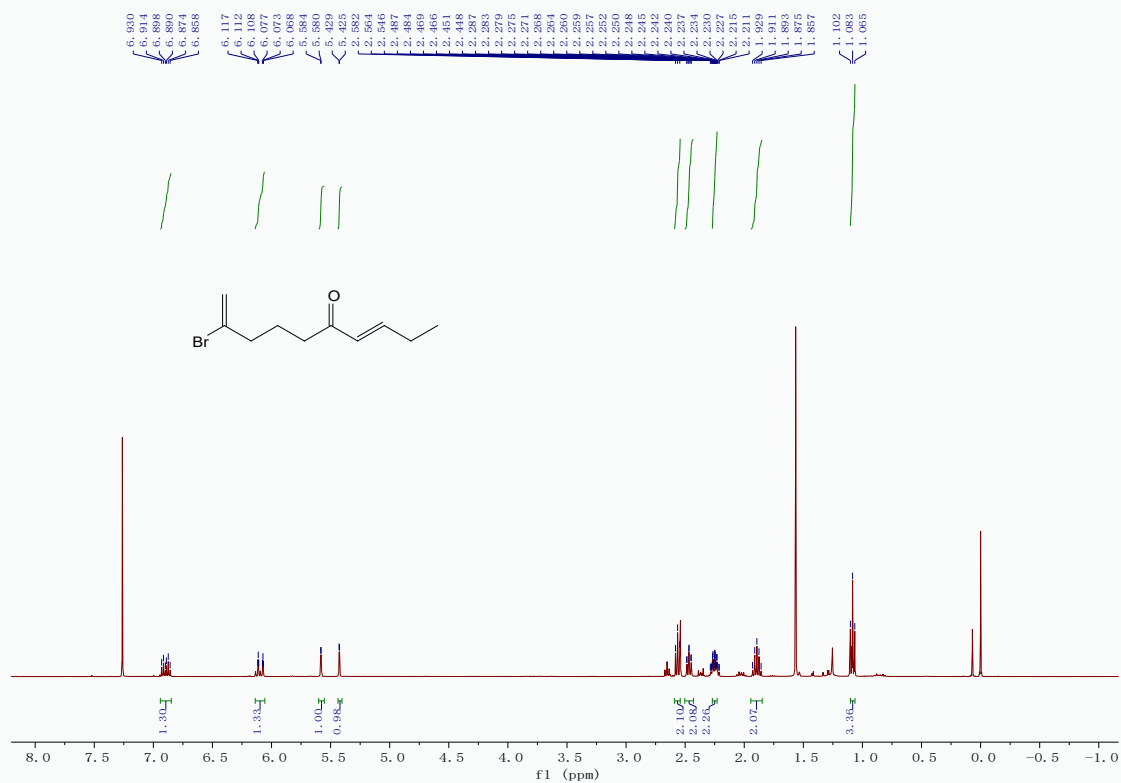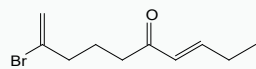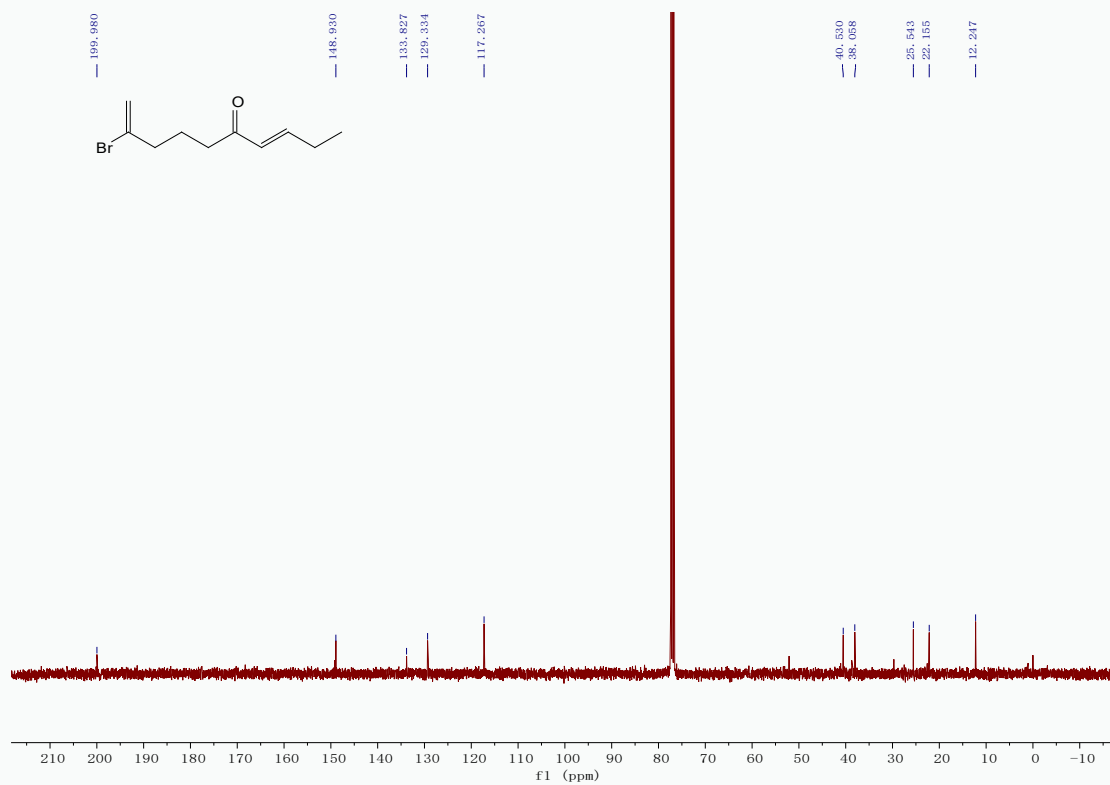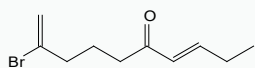

(8*R*,9*S*,13*S*,14*S*)-13-methyl-17-oxo-7,8,9,11,12,13,14,15,16,17-decahydro-6H-cyclopenta[a]phenanthren-3-yl (*E*)-6-methylene-10-oxotetradec-11-enoate (**2u**) (Using CDCl<sub>3</sub> as solvent)

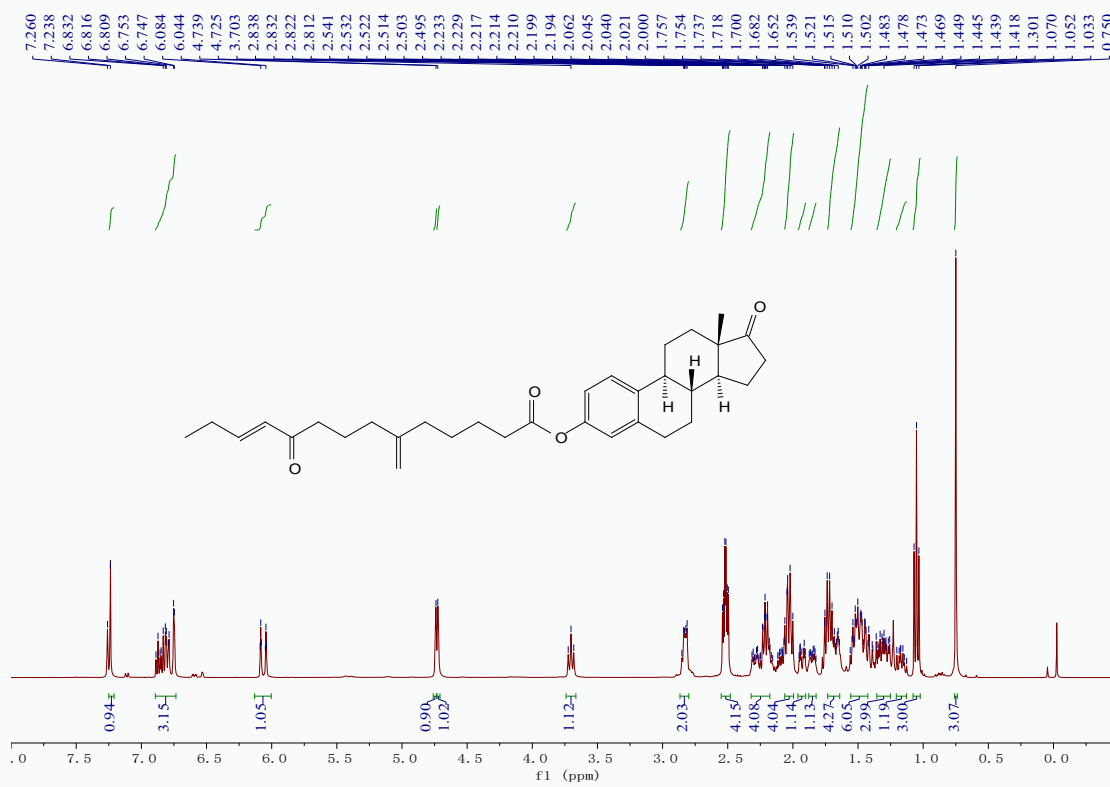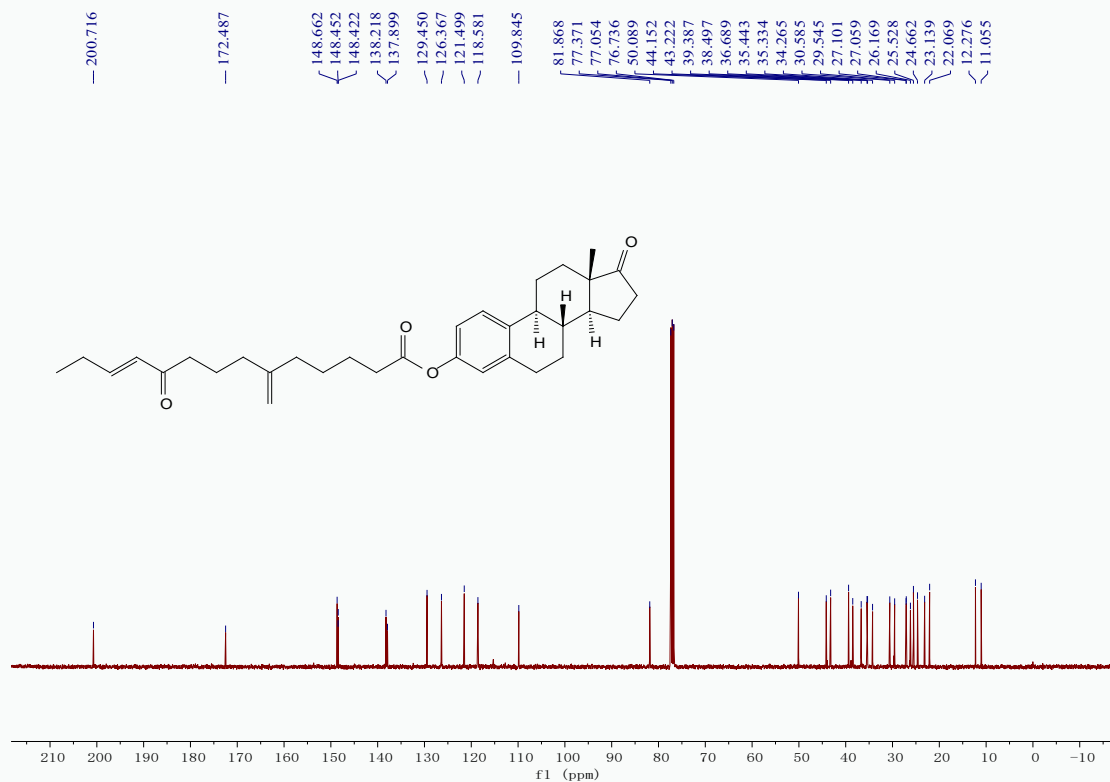



(*E*)-11-((3*aS*,5*aR*,5*bR*,7*aR*,9*S*,11*aR*,11*bR*,13*aR*,13*bR*)-9-((*tert*-butyldimethylsilyl)oxy)-3-(((*tert*-butyldimethylsilyl)oxy)methyl)-5*a*,5*b*,8,8,11*a*-pentamethylcosahydro-1*H*-cyclopenta[*a*]chrysen-1-yl)-9-methylenedodec-3-en-5-one (2v) (Using CDCl<sub>3</sub> as solvent)

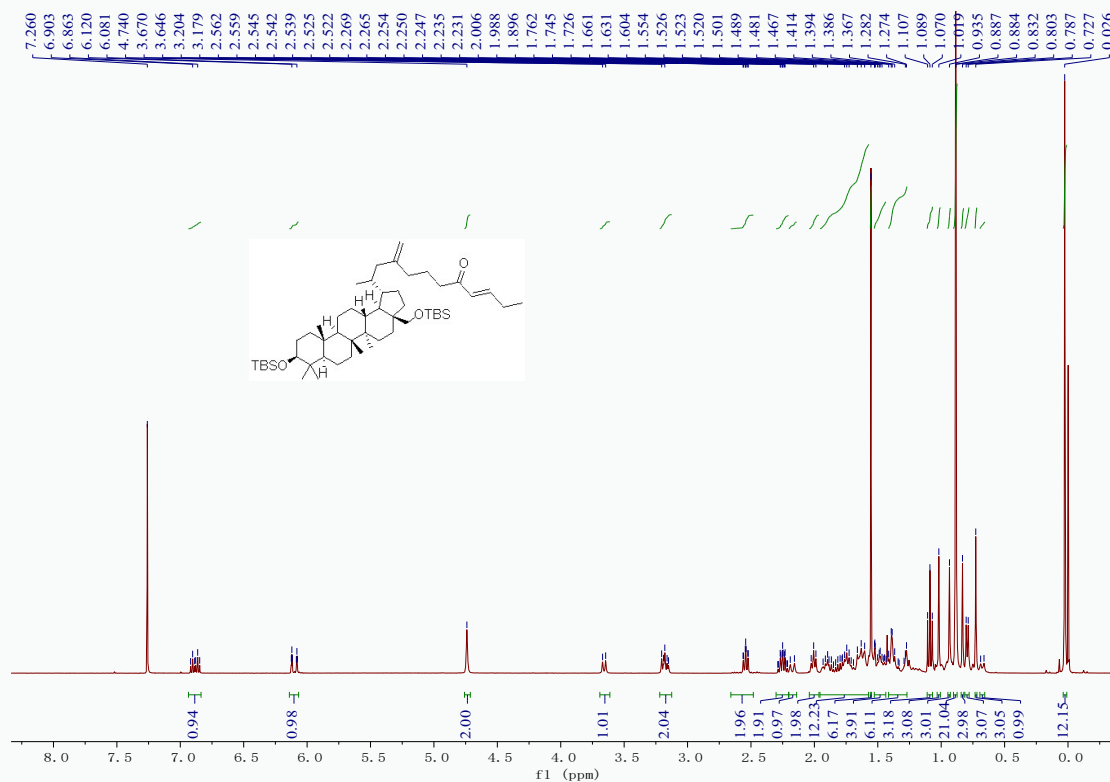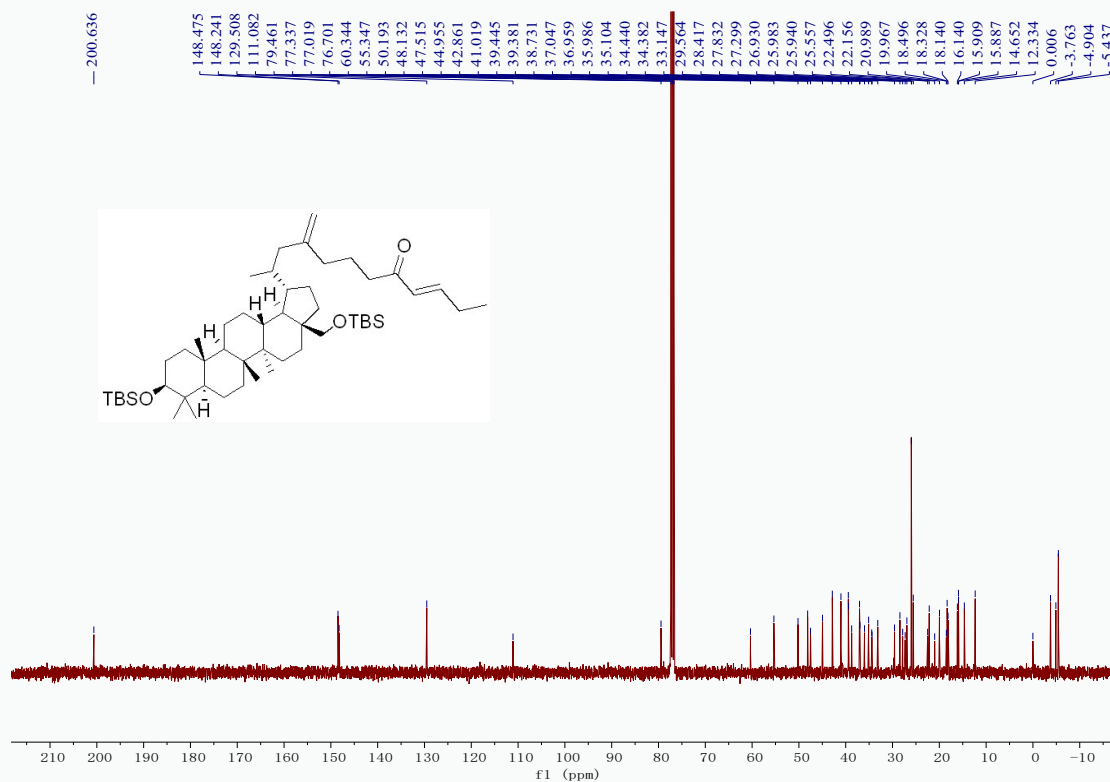

tert-butyl(((1*S*,6*R*,7*R*)-7-(tert-butyl)-5,5-dimethylbicyclo[4.1.0]heptan-1-yl)oxy) dimethylsilane (**3a**) (Using Acetone-*d*<sub>6</sub> as solvent)

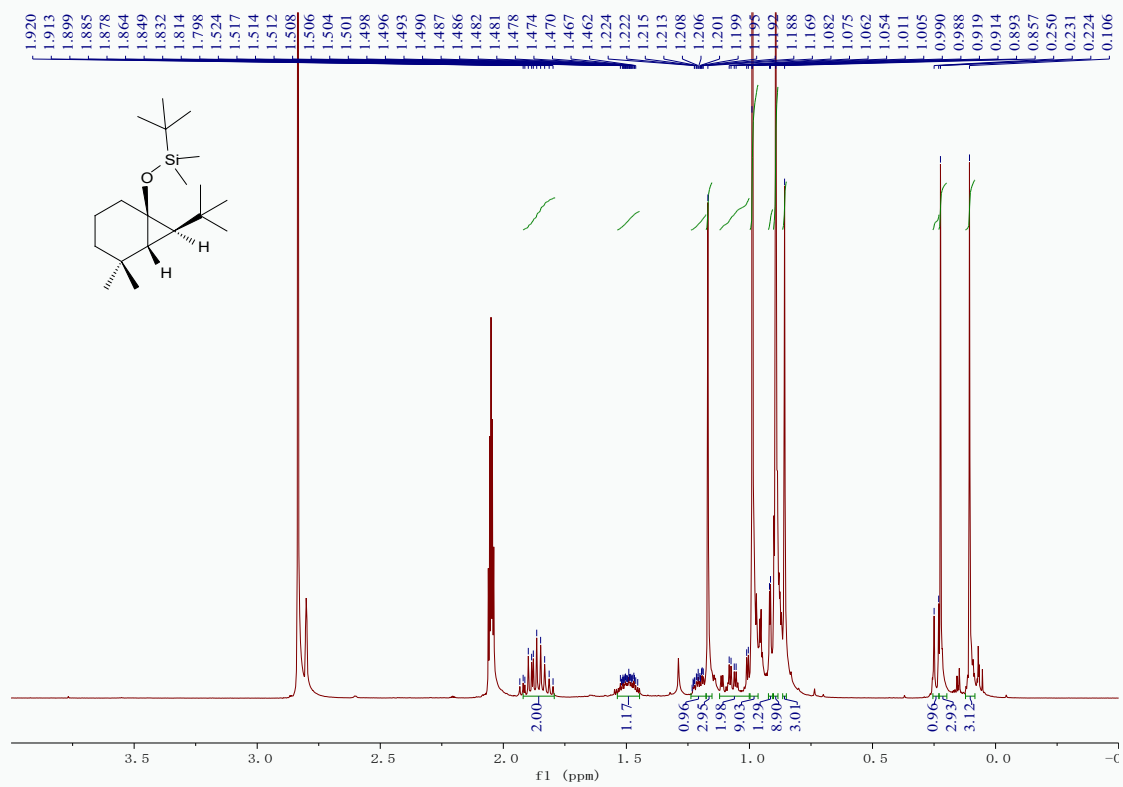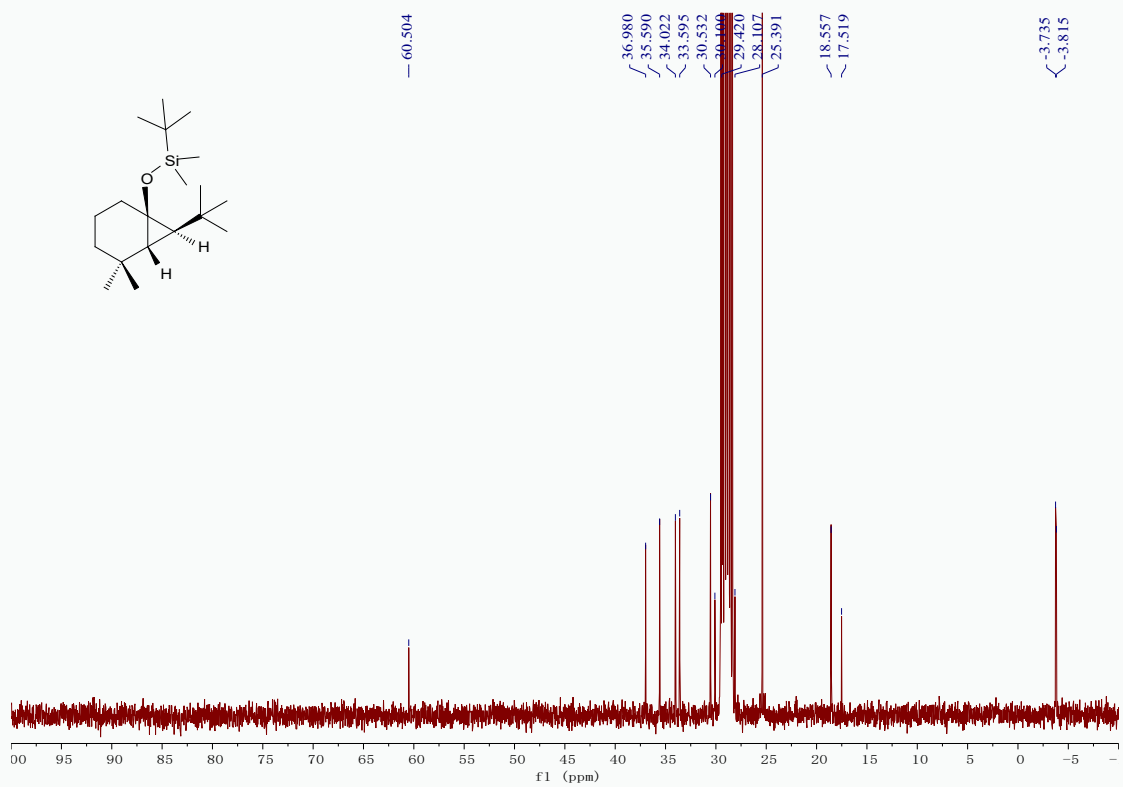

tert-butyl(((1*S*,6*R*,7*S*)-7-ethyl-5,5-dimethylbicyclo[4.1.0]heptan-1-yl)oxy)dimethylsilane (**3b**)  
 (Using Acetone-*d*<sub>6</sub> as solvent)

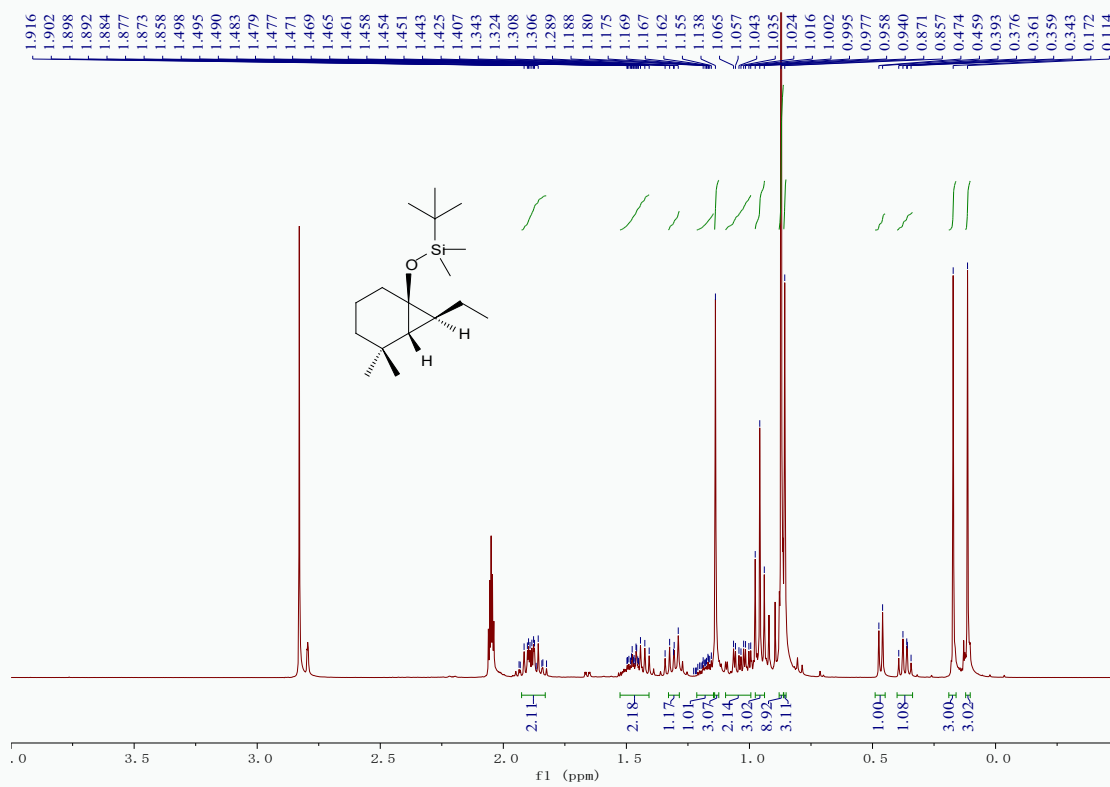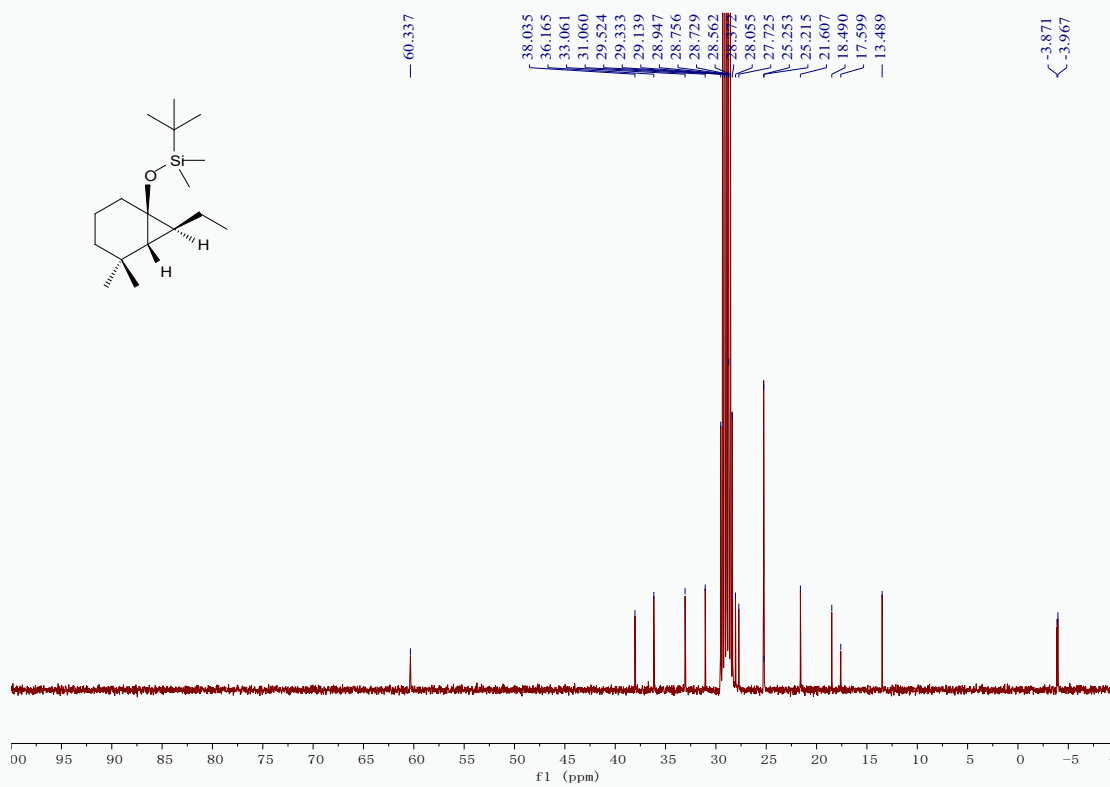

tert-butyl(((1*S*,6*R*,7*S*)-7-isopropyl-5,5-dimethylbicyclo[4.1.0]heptan-1-yl)oxy)dimethylsilane  
**(3c)** (Using Acetone-*d*<sub>6</sub> as solvent)

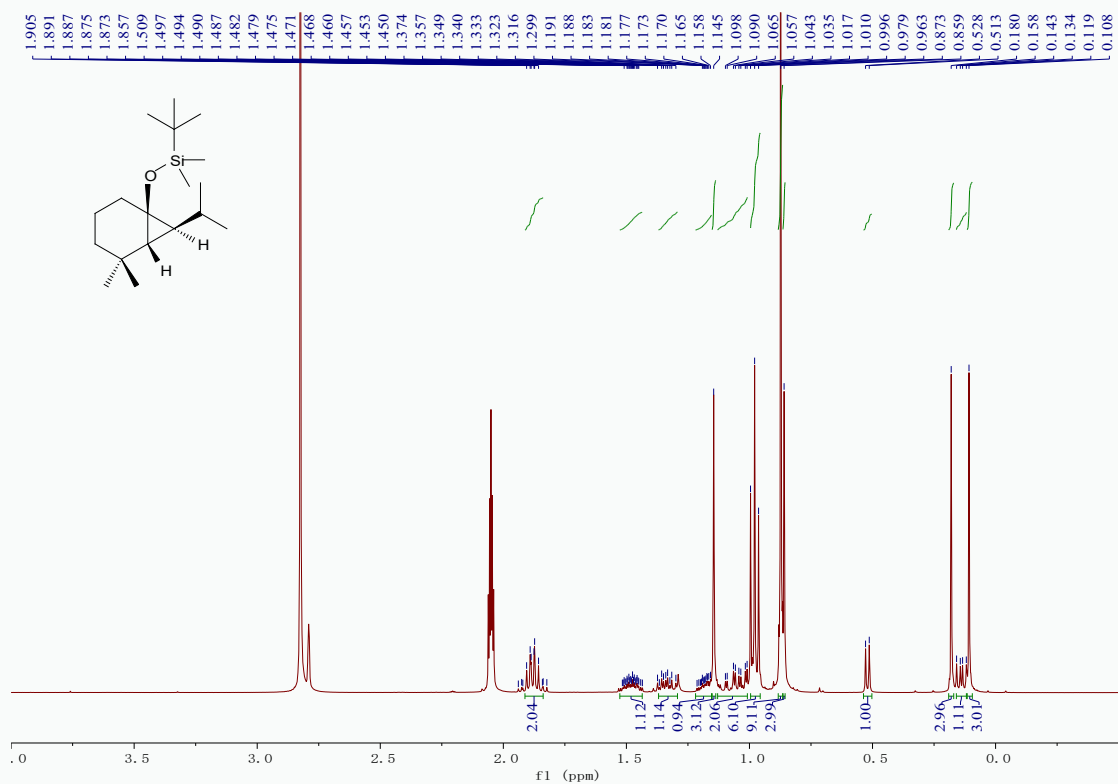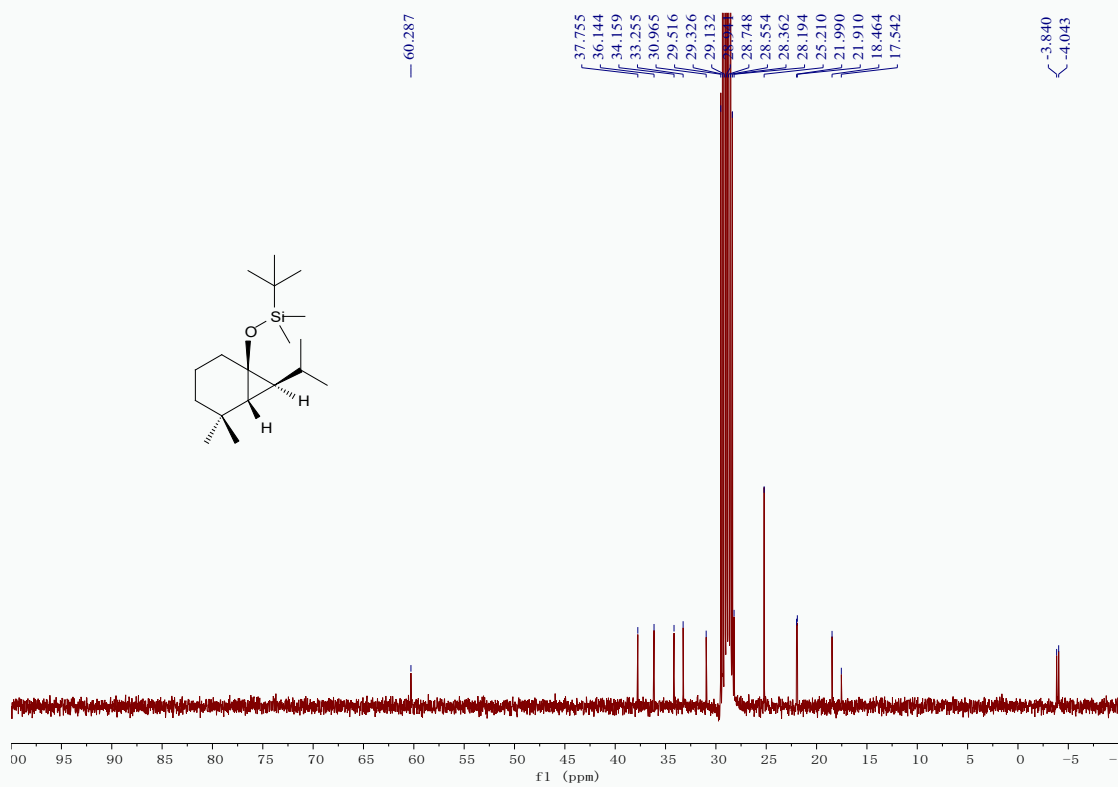

tert-butyl(((1*S*,6*R*,7*S*)-5,5-dimethyl-7-octylbicyclo[4.1.0]heptan-1-yl)oxy)dimethylsilane (**3d**)  
 (Using Acetone-*d*<sub>6</sub> as solvent)

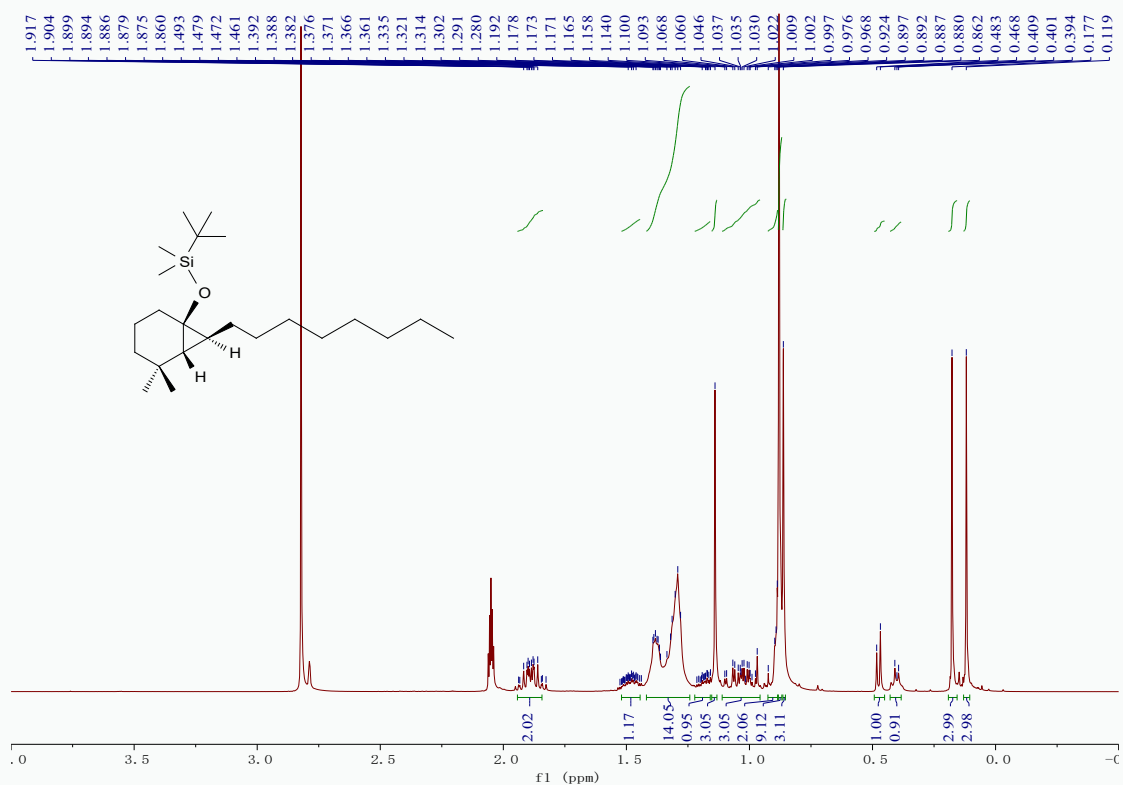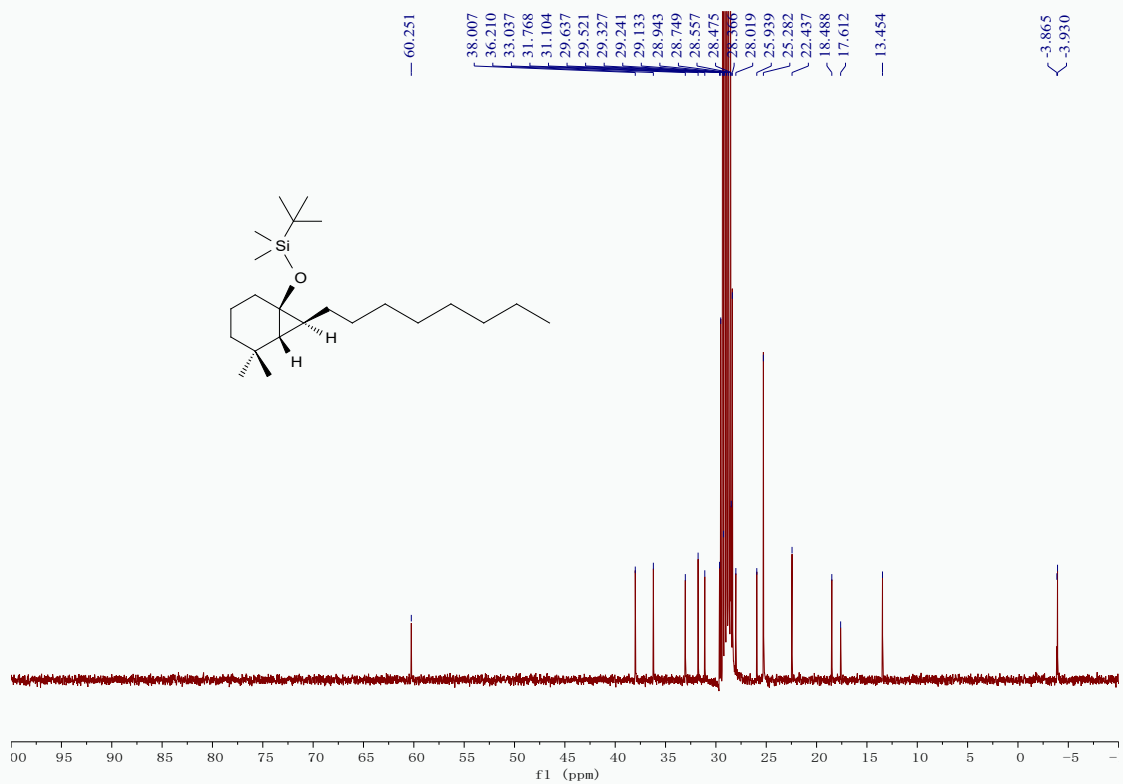

tert-butyl(2-((1*S*,6*R*,7*S*)-1-((tert-butyl dimethylsilyl)oxy)-5,5-dimethylbicyclo[4.1.0]heptan-7-yl)ethoxy)dimethylsilane (**3e**) (Using Acetone-*d*<sub>6</sub> as solvent)

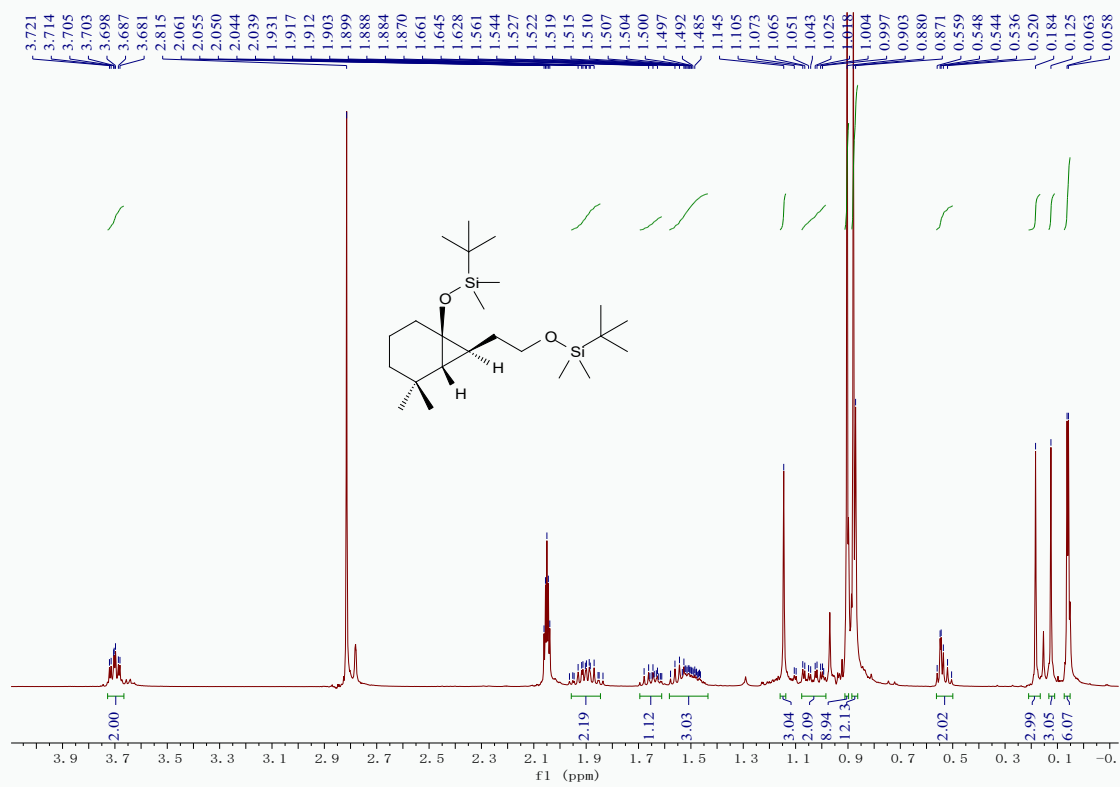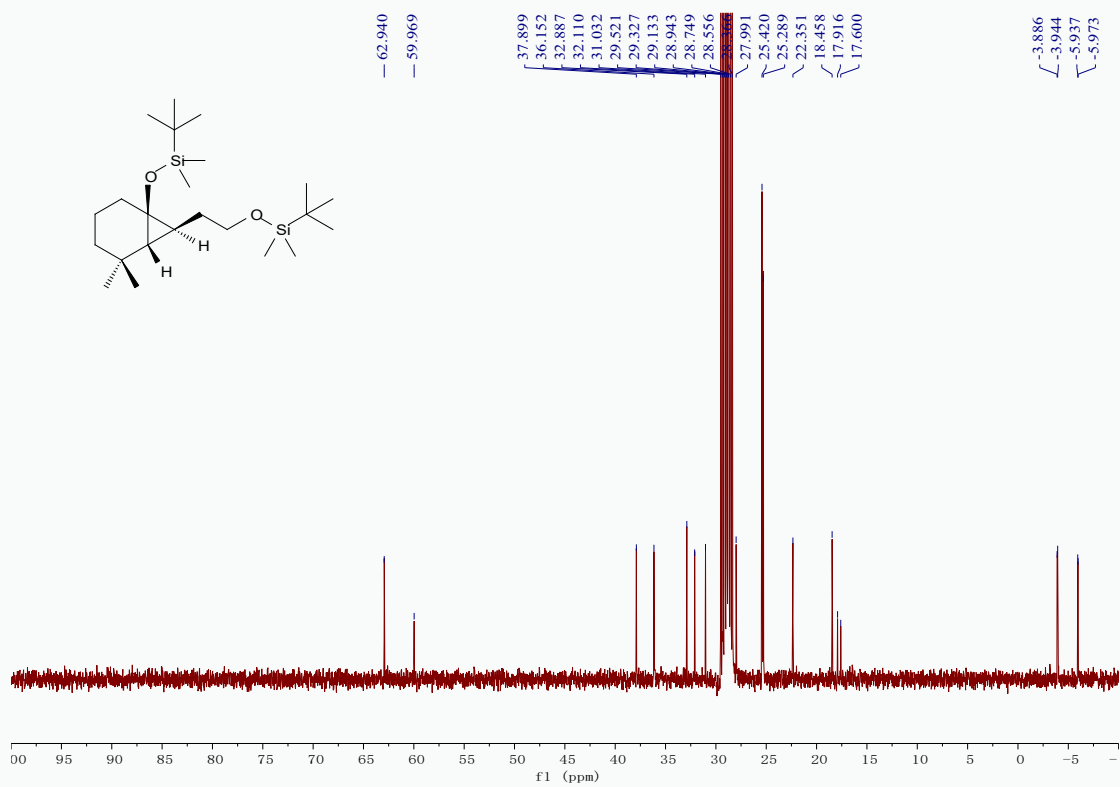



tert-butyl(((1*S*,6*R*,7*S*)-5,5-dimethyl-7-(2-phenylpropyl)bicyclo[4.1.0]heptan-1-yl)oxy)-dimethyl silane (**3g**) (Using Acetone-*d*<sub>6</sub> as solvent)

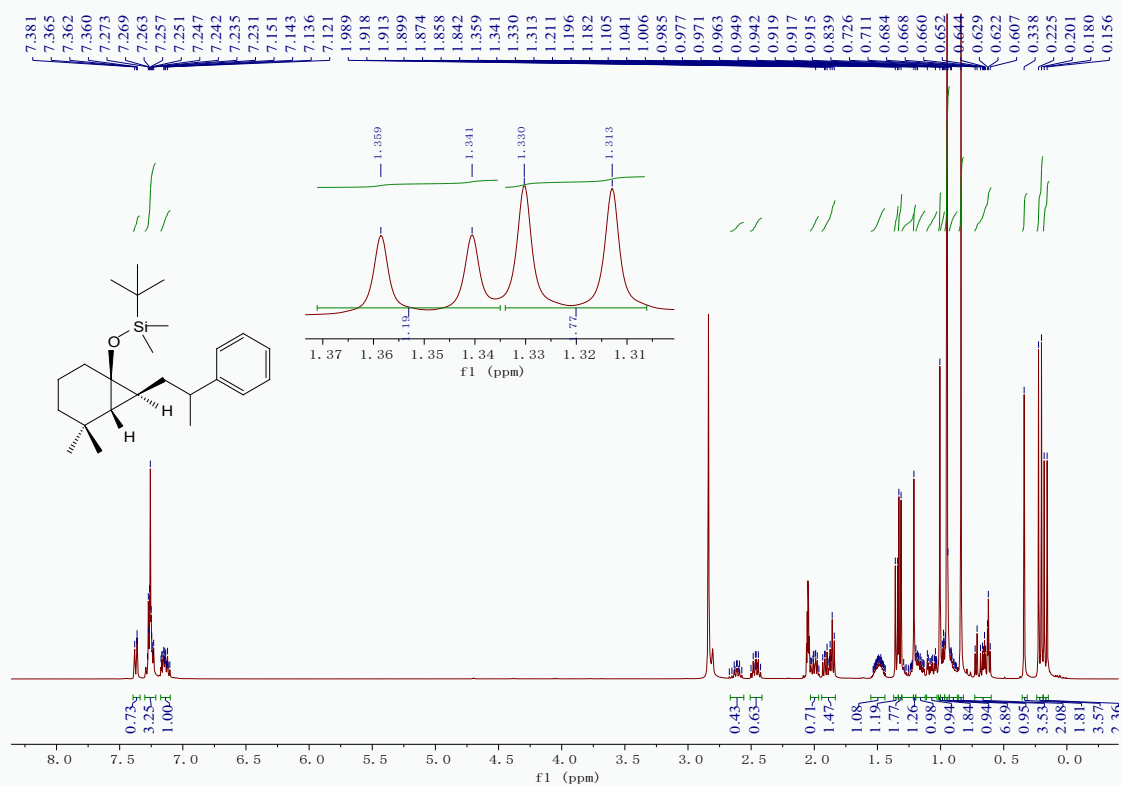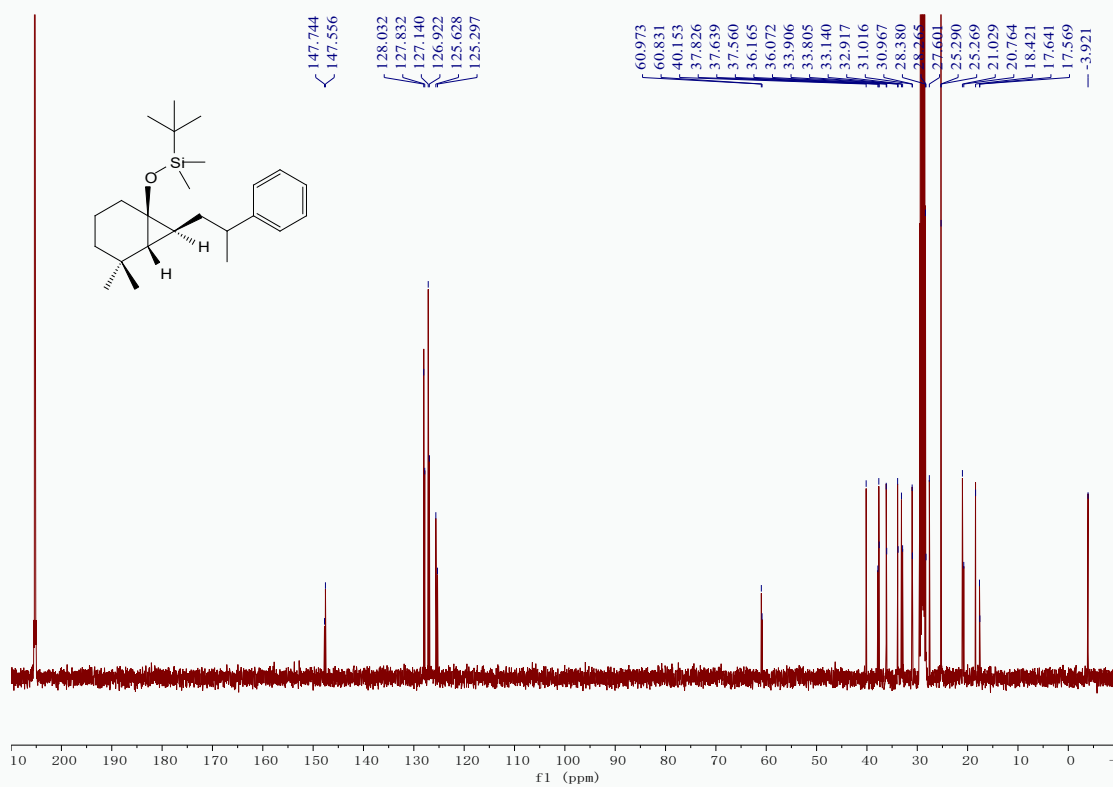



tert-butyl(((1*S*,6*R*,7*S*)-5,5-dimethyl-7-phenethylbicyclo[4.1.0]heptan-1-yl)oxy)dimethylsilane  
**(3h)** (Using Acetone-*d*<sub>6</sub> as solvent)

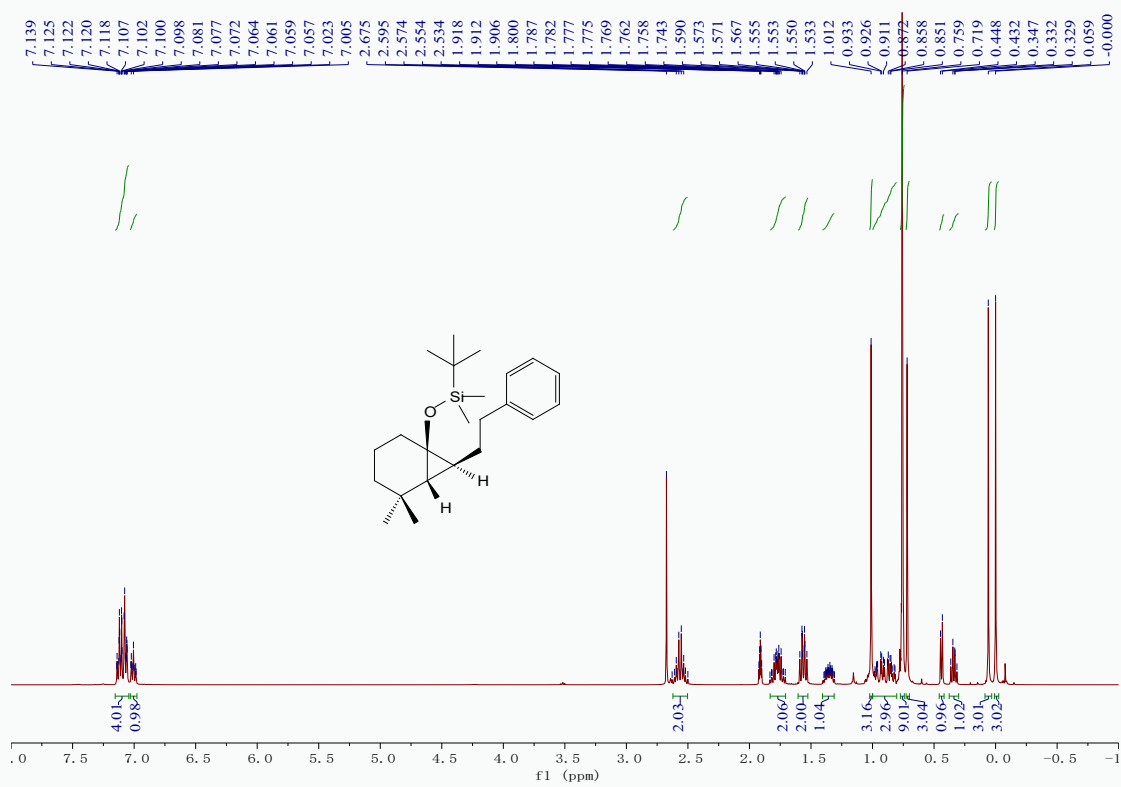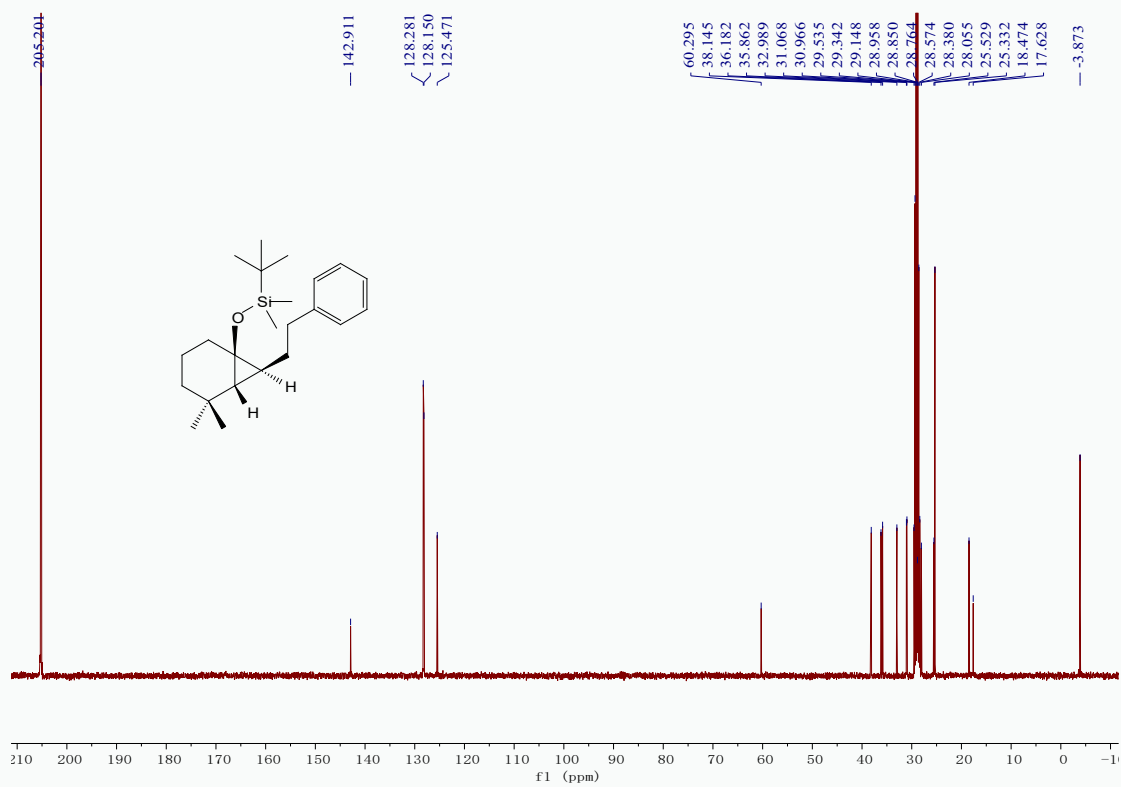

1-(3-((1*S*,6*R*,7*S*)-1-((*tert*-butyldimethylsilyloxy)-5,5-dimethylbicyclo[4.1.0]-2,2-dimethylcyclobutyl)ethan-1-one) heptan-7-yl)-2,2-dimethylcyclobutyl)ethan-1-one (**3i**) (Using Acetone-*d*<sub>6</sub> as solvent)

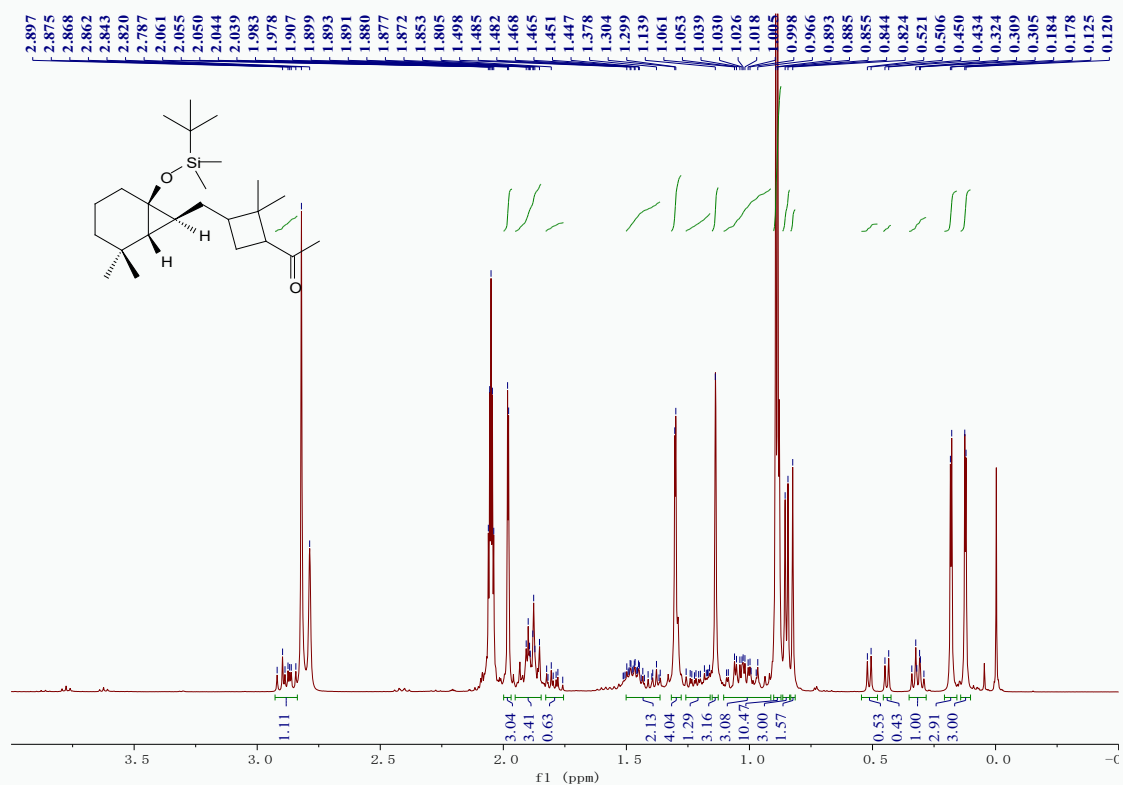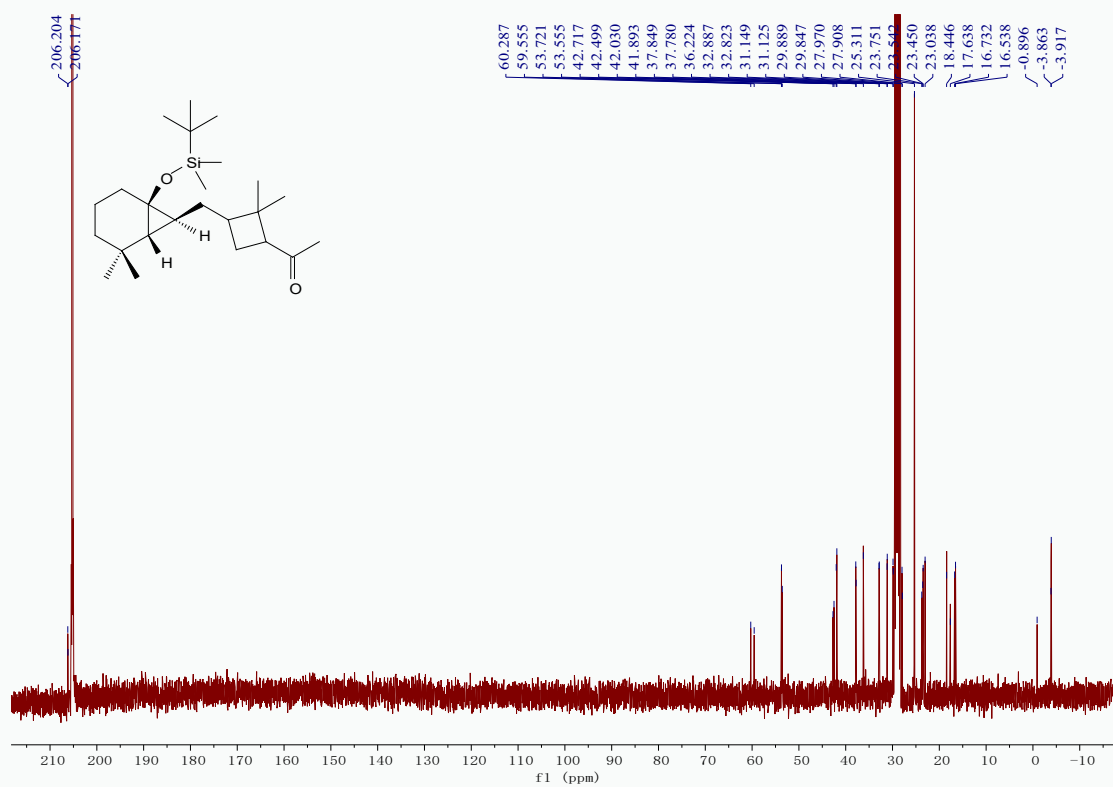

tert-butyl(((1*S*,6*R*,7*S*)-7-cyclopentyl-5,5-dimethylbicyclo[4.1.0]heptan-1-yl)oxy) dimethylsilane (**3j**) (Using Acetone-*d*<sub>6</sub> as solvent)

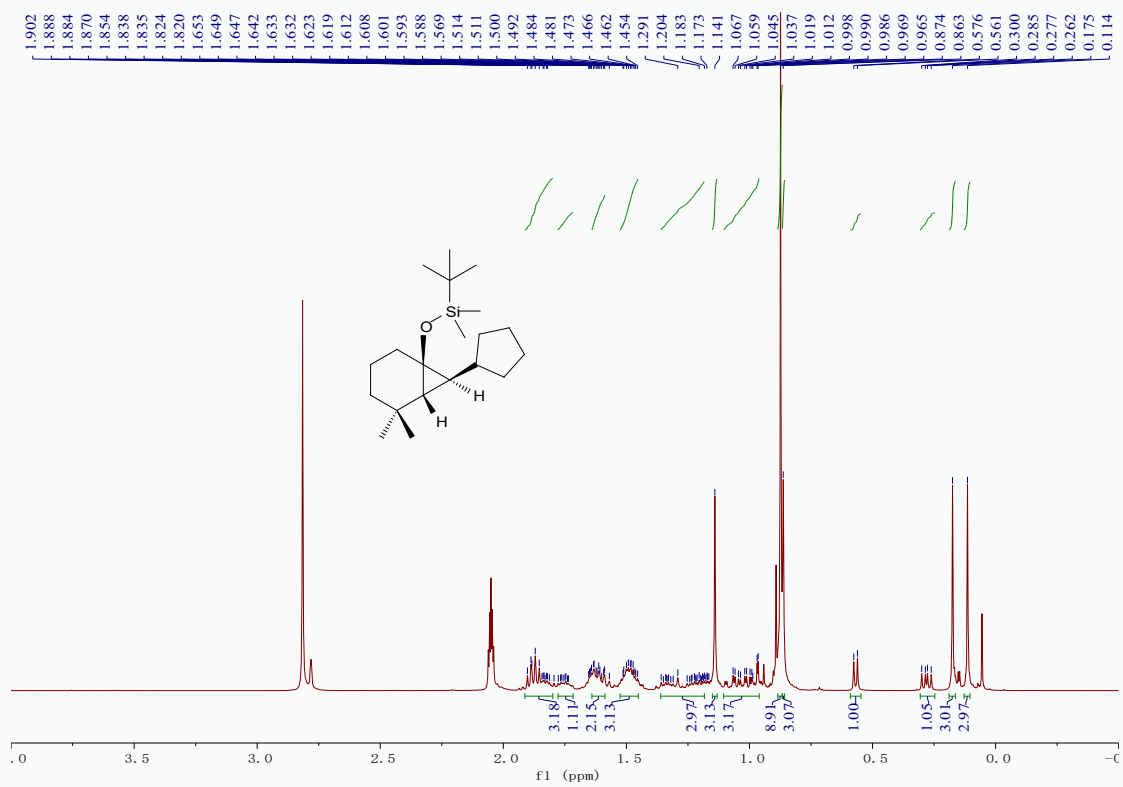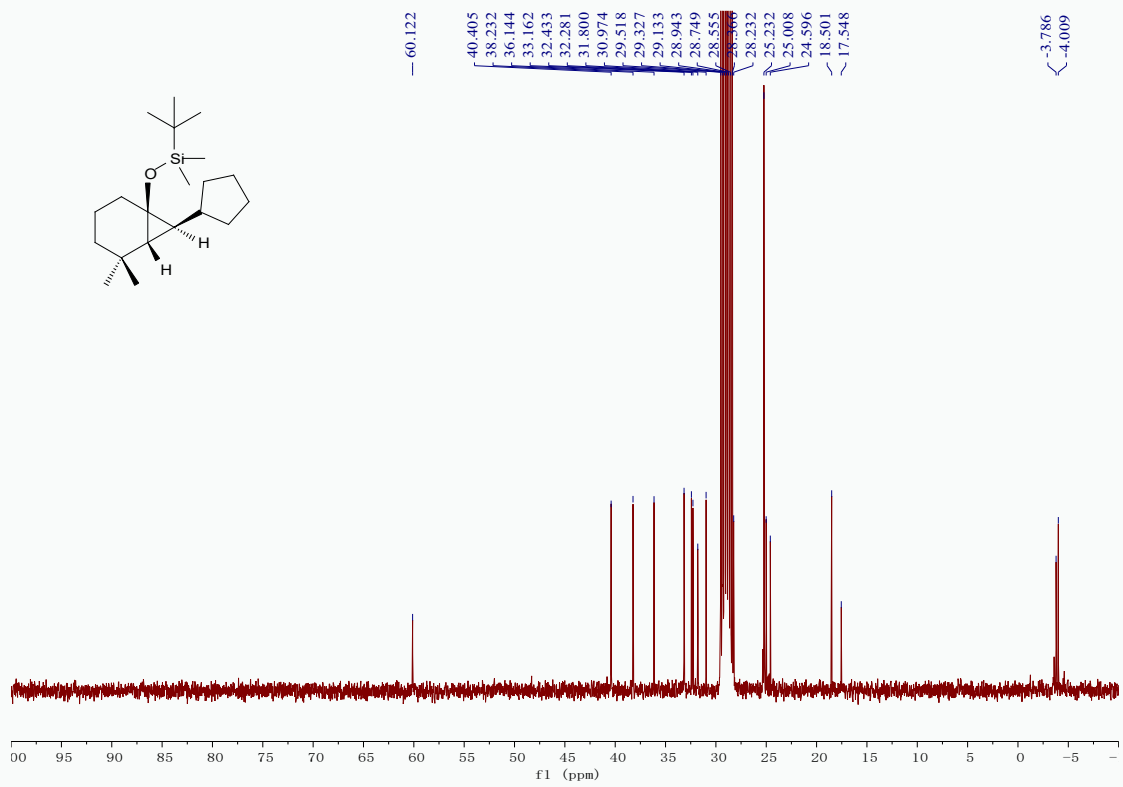

tert-butyl(((1*R*,6*R*,7*R*)-7-(4-((methoxymethoxy)methyl)-2,2-dimethyl-1,3-dioxolan-4-yl)-5,5-dimethylbicyclo[4.1.0]heptan-1-yl)oxy)dimethylsilane (**3k**) (Using Acetone-*d*<sub>6</sub> as solvent)

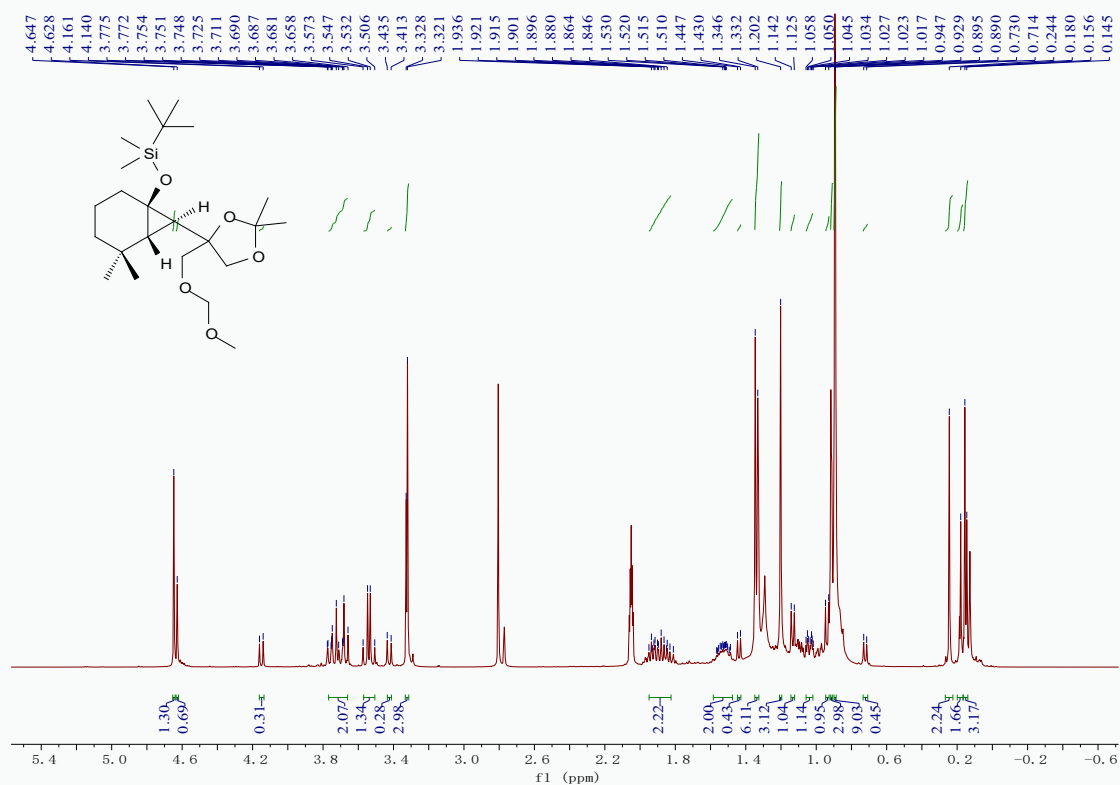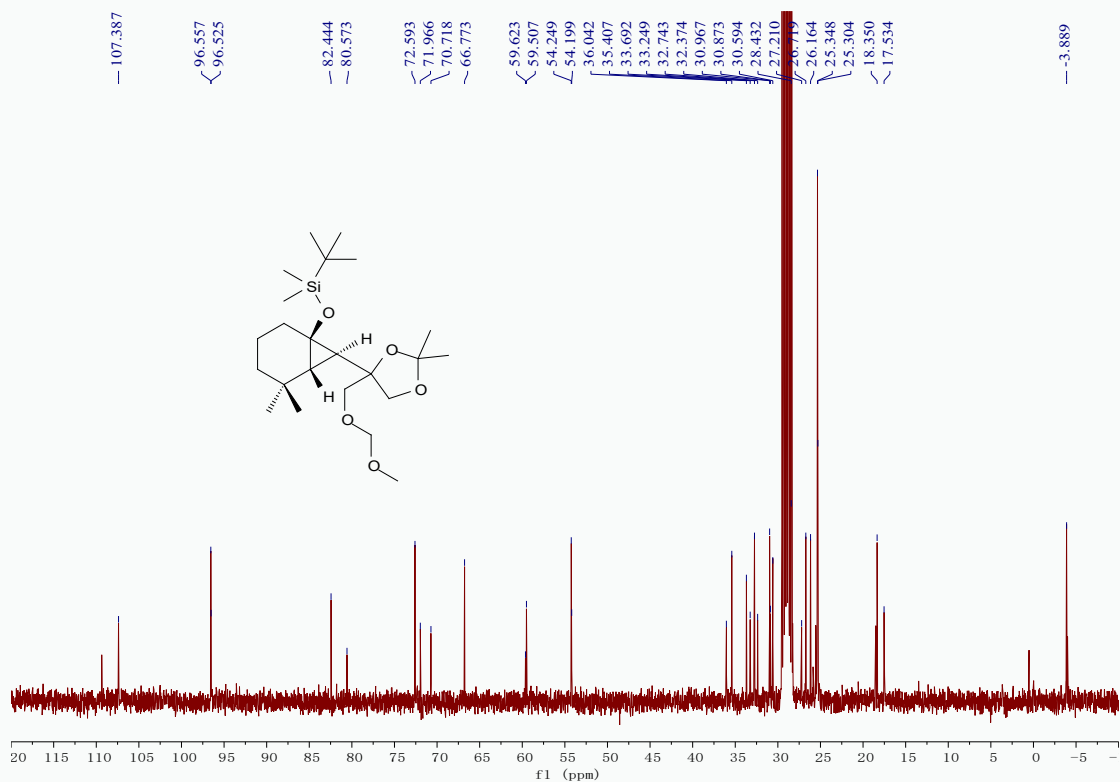

tert-butyl(((1*S*,6*R*,7*S*)-7-cyclohexyl-5,5-dimethylbicyclo[4.1.0]heptan-1-yl)oxy) dimethylsilane (**31**) (Using Acetone-*d*<sub>6</sub> as solvent)

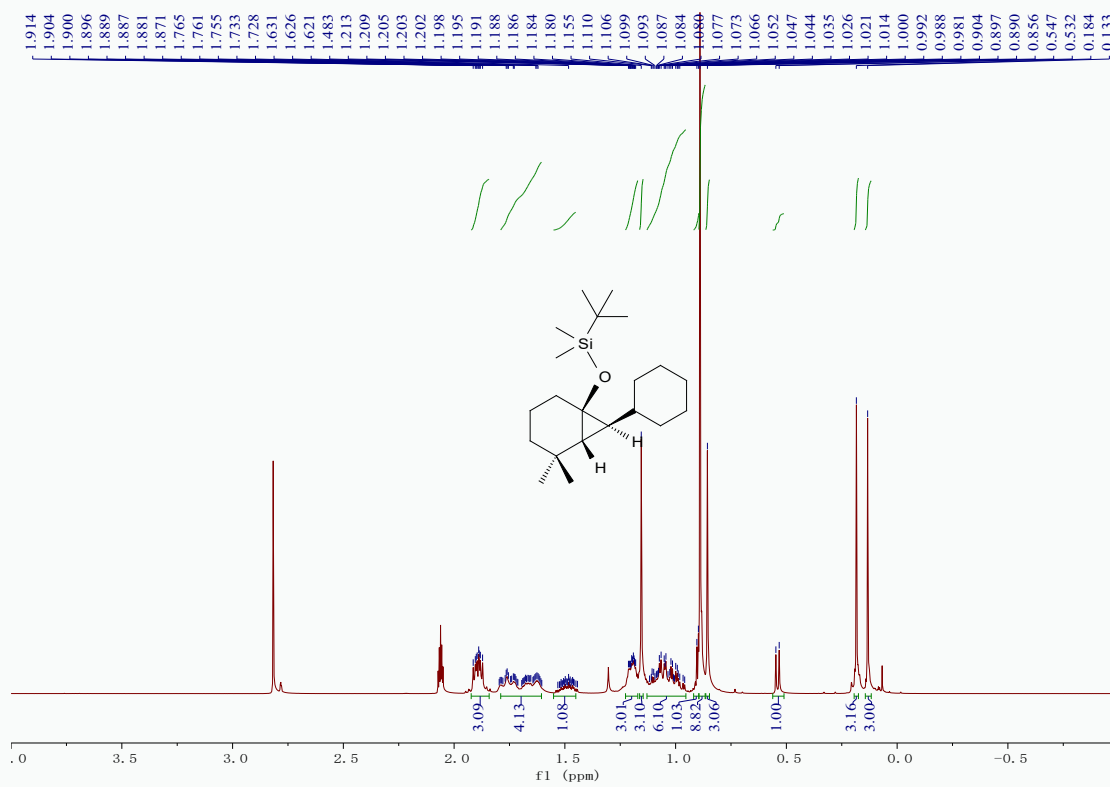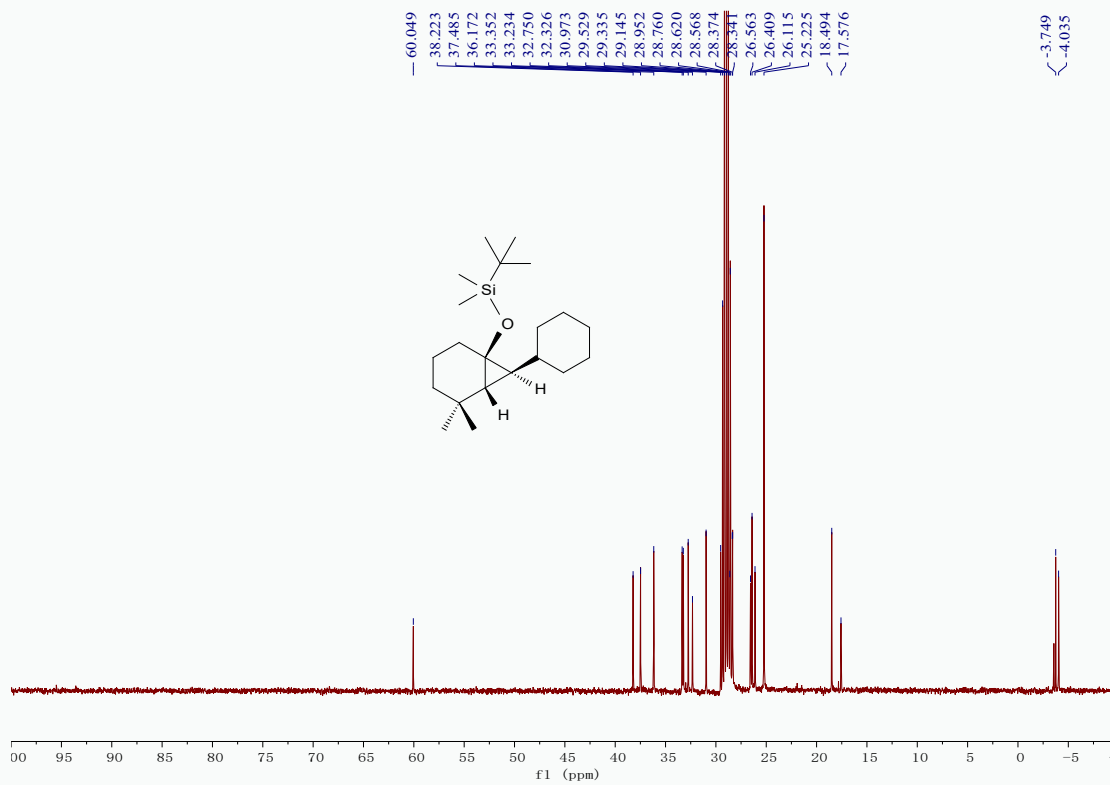

tert-butyl(((1*S*,6*R*,7*S*)-7-ethyl-2,2,5,5-tetramethyl-3-oxabicyclo[4.1.0]heptan-1-yl)oxy)-dimethylsilane (**3m**) (Using Acetone-*d*<sub>6</sub> as solvent)

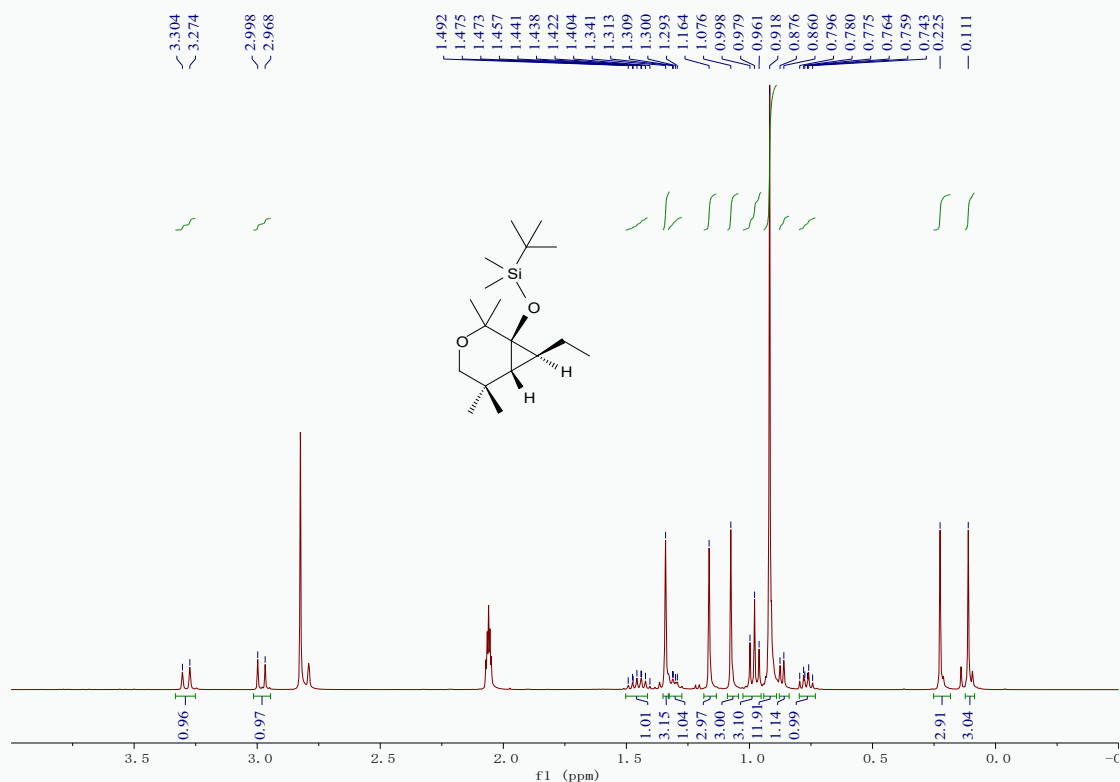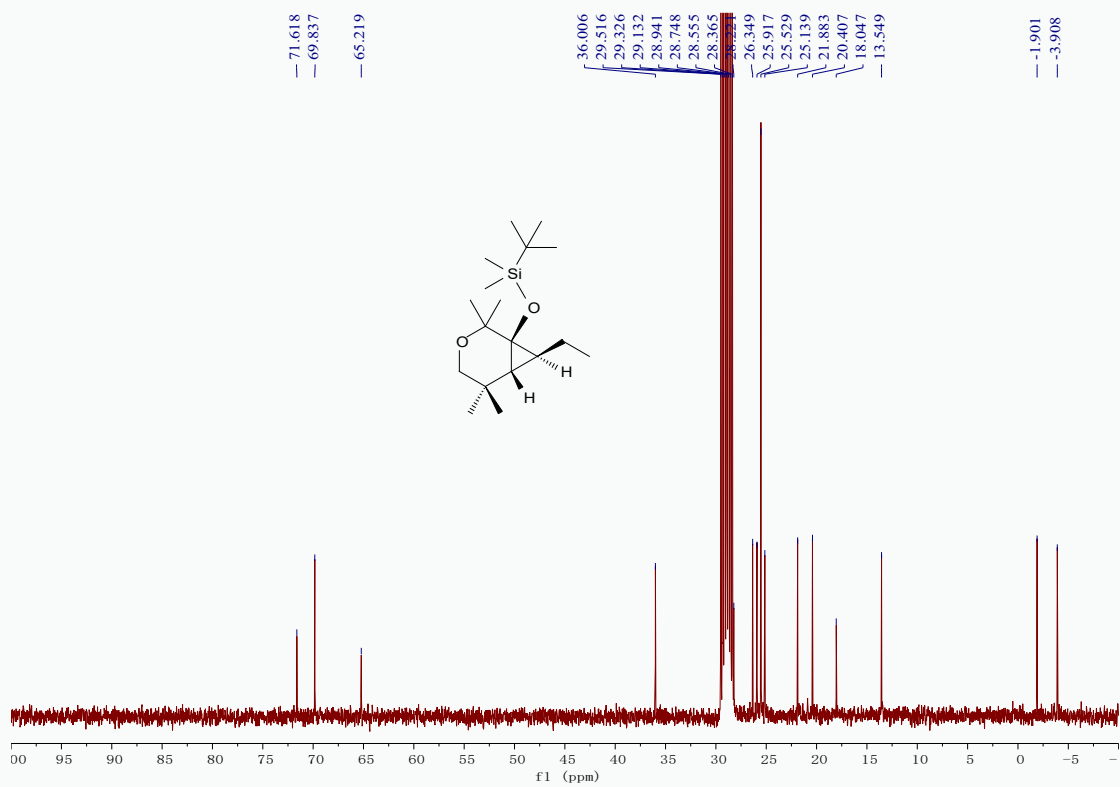

tert-butyl(((1*S*,6*R*,7*S*)-7-ethyl-5,5-dimethylspiro[bicyclo[4.1.0]heptane-2,1'-cyclohexan]-1-yl)oxy)dimethylsilane (**3n**) (Using Acetone-*d*<sub>6</sub> as solvent)

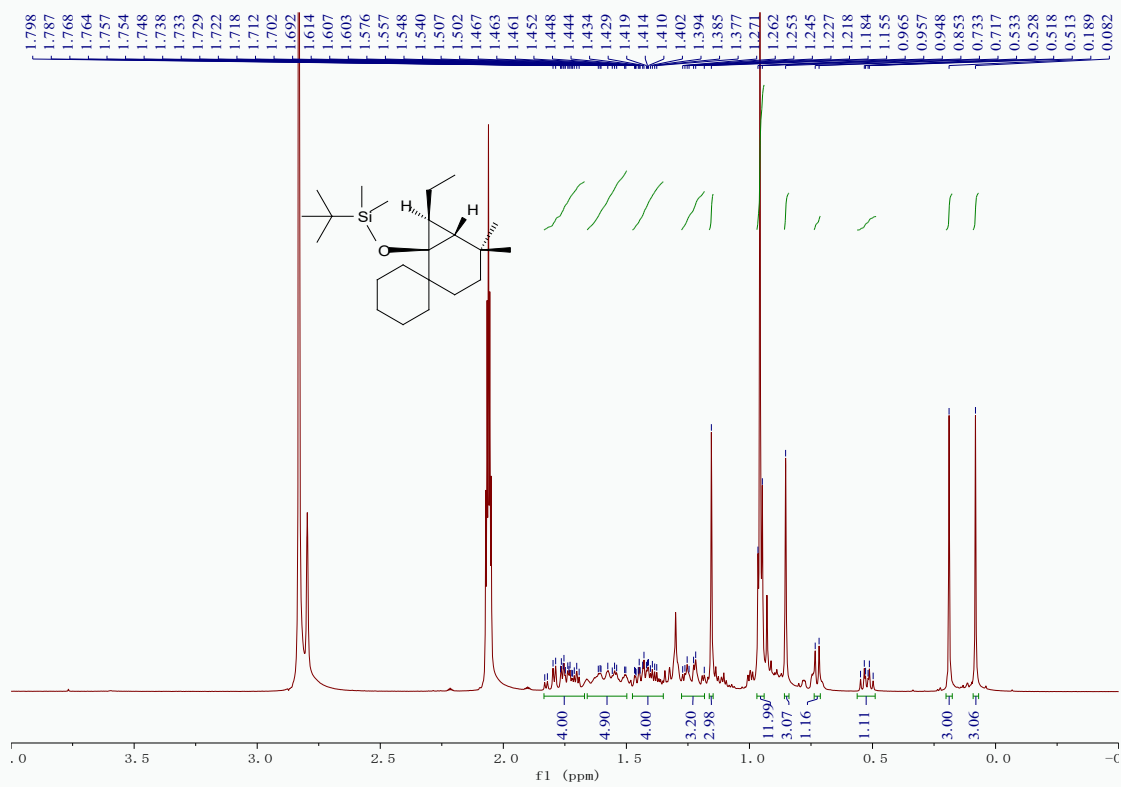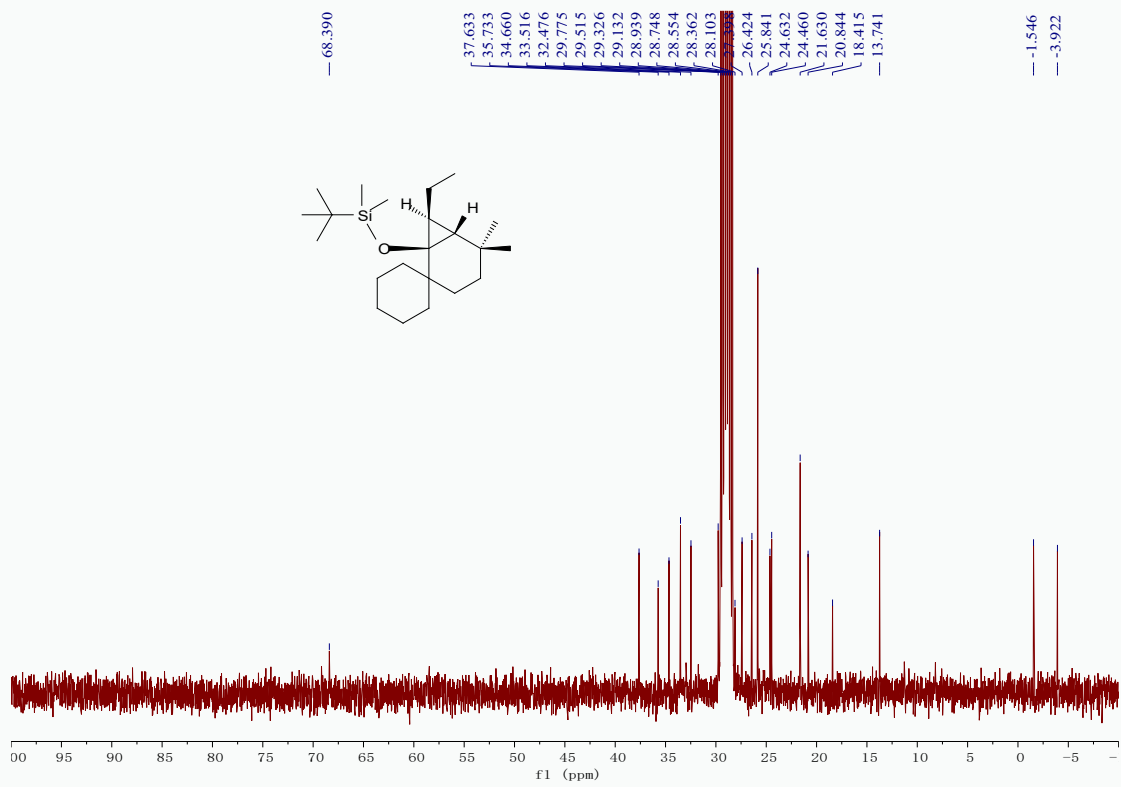

tert-butyl(((1*R*,6*S*,7*S*)-7-ethylspiro[bicyclo[4.1.0]heptane-2,1'-cyclohexan]-6-yl)oxy)-dimethylsilane (**30**) (Using Acetone-*d*<sub>6</sub> as solvent)

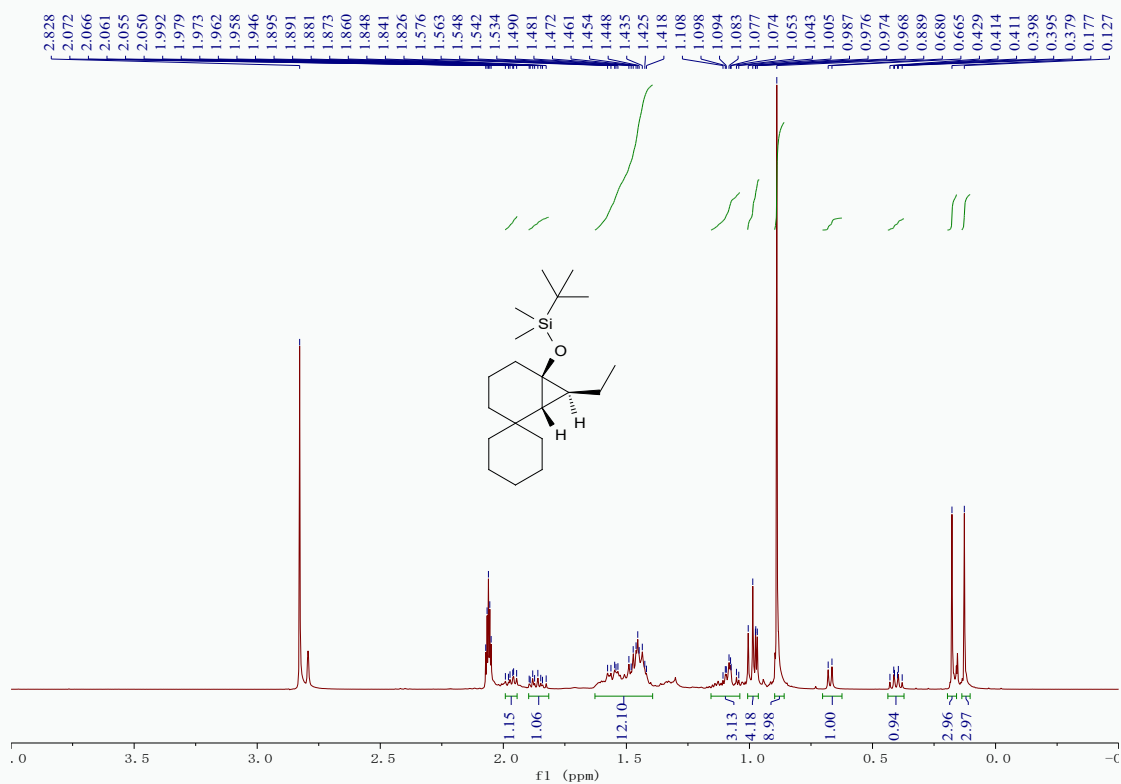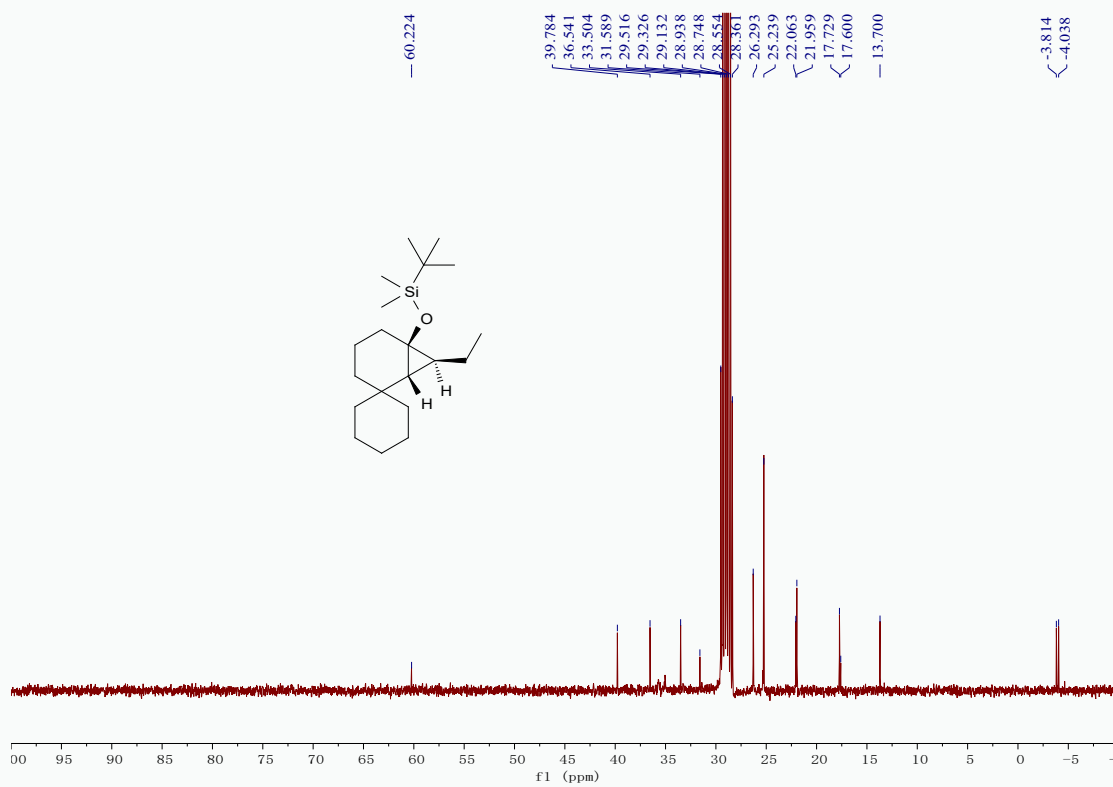



tert-butyl dimethyl(((1*R*,6*S*)-5,5,7,7-tetramethylbicyclo[4.1.0]heptan-1-yl)oxy)silane (3p)  
(Using Acetone-*d*<sub>6</sub> as solvent)

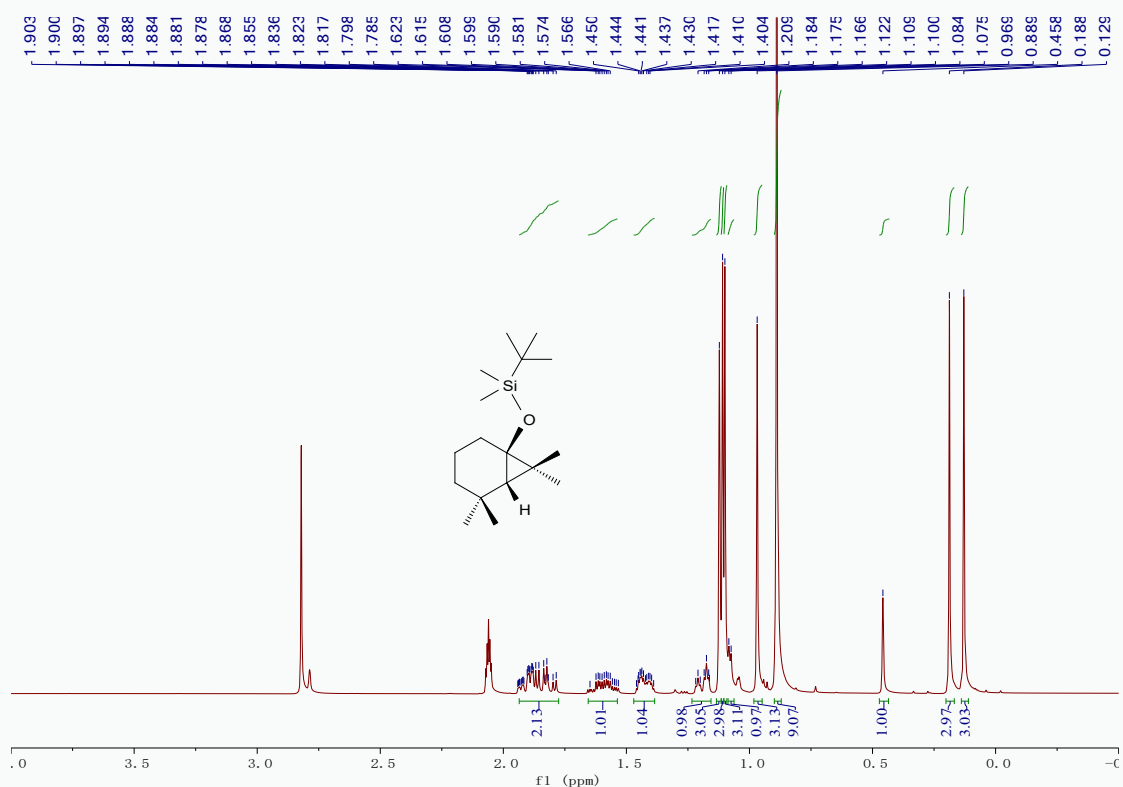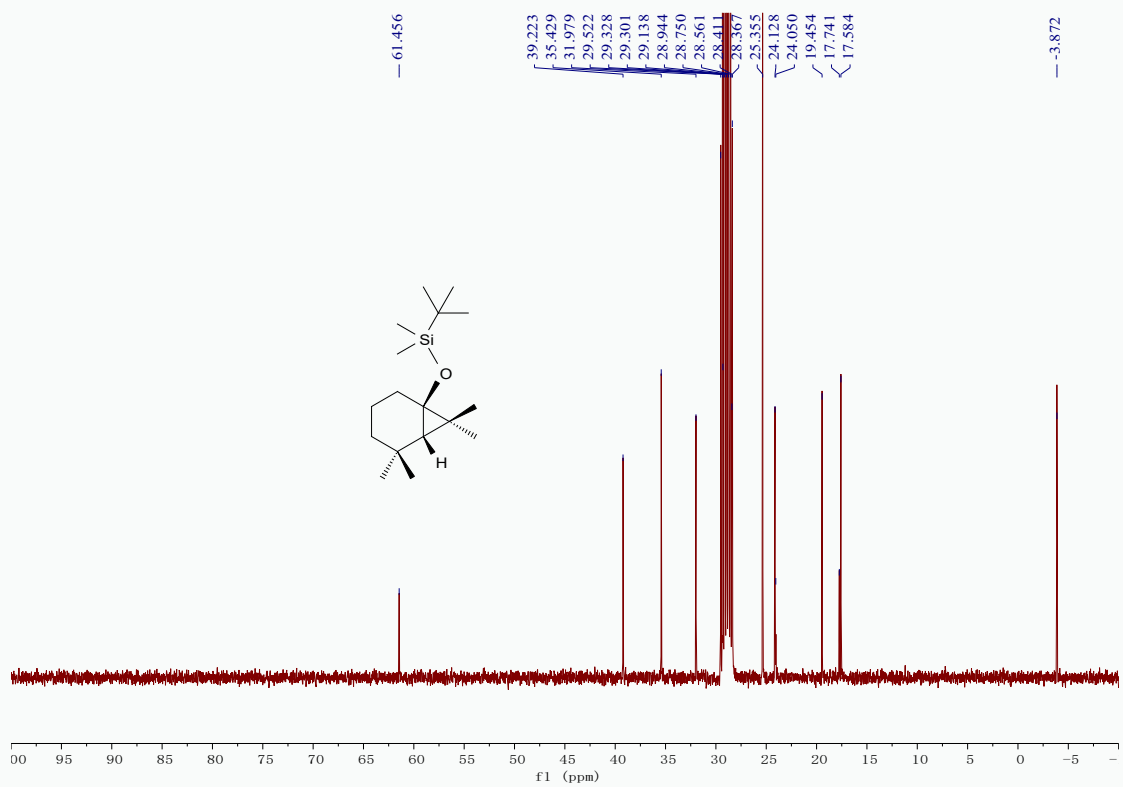

tert-butyl(((1*R*,6*S*)-5-isopropyl-5,7,7-trimethylbicyclo[4.1.0]heptan-1-yl)oxy) dimethylsilane  
**(3q)** (Using Acetone-*d*<sub>6</sub> as solvent)

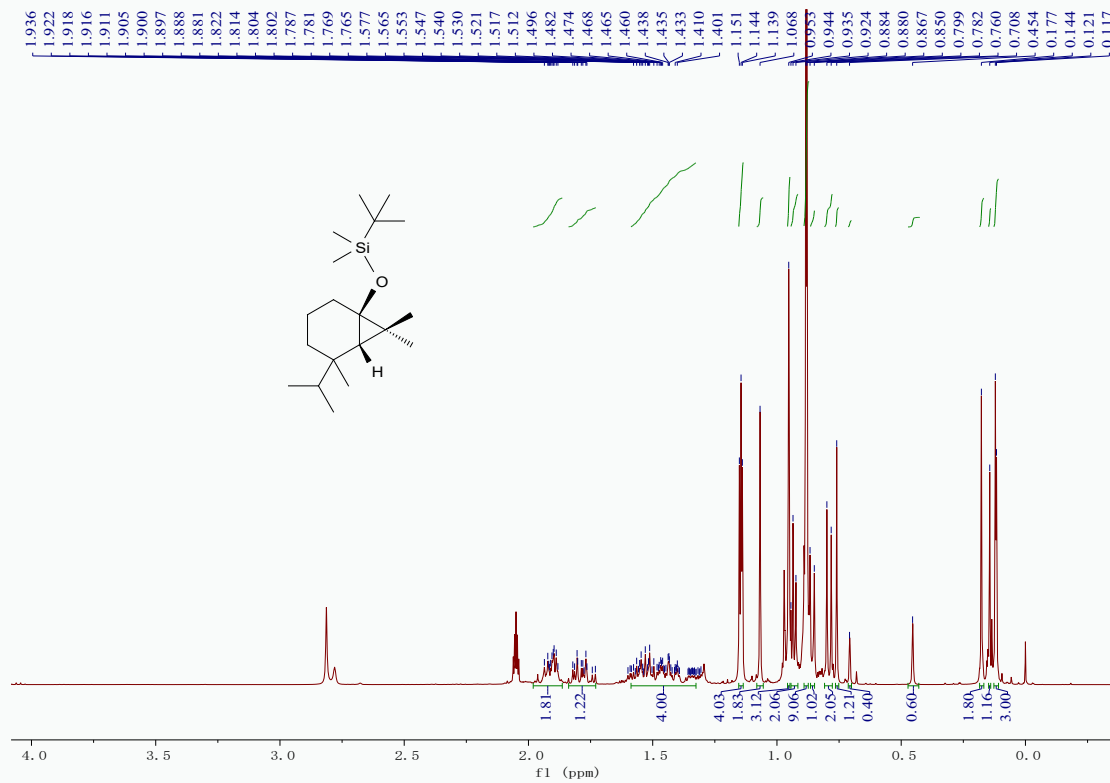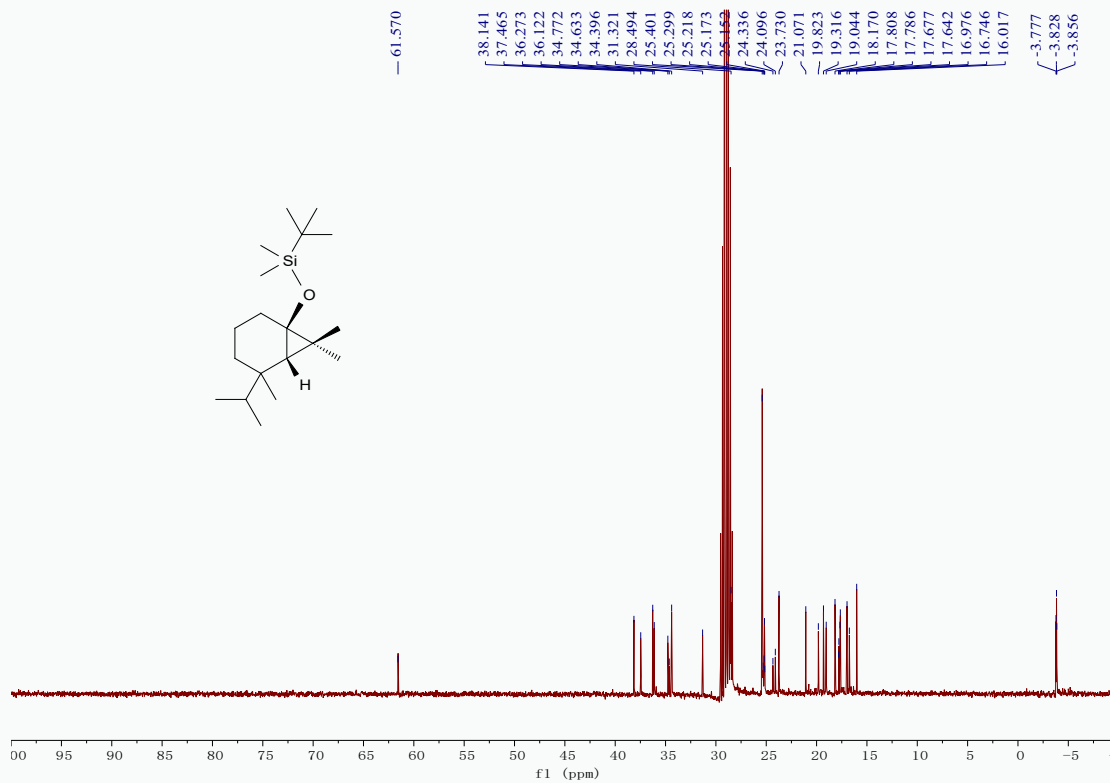

tert-butyl(((1*S*,6*R*)-2,2-dimethylspiro[bicyclo[4.1.0]heptane-7,1'-cyclohexan]-6-yl)oxy)-dimethylsilane (**3r**) (Using Acetone-*d*<sub>6</sub> as solvent)

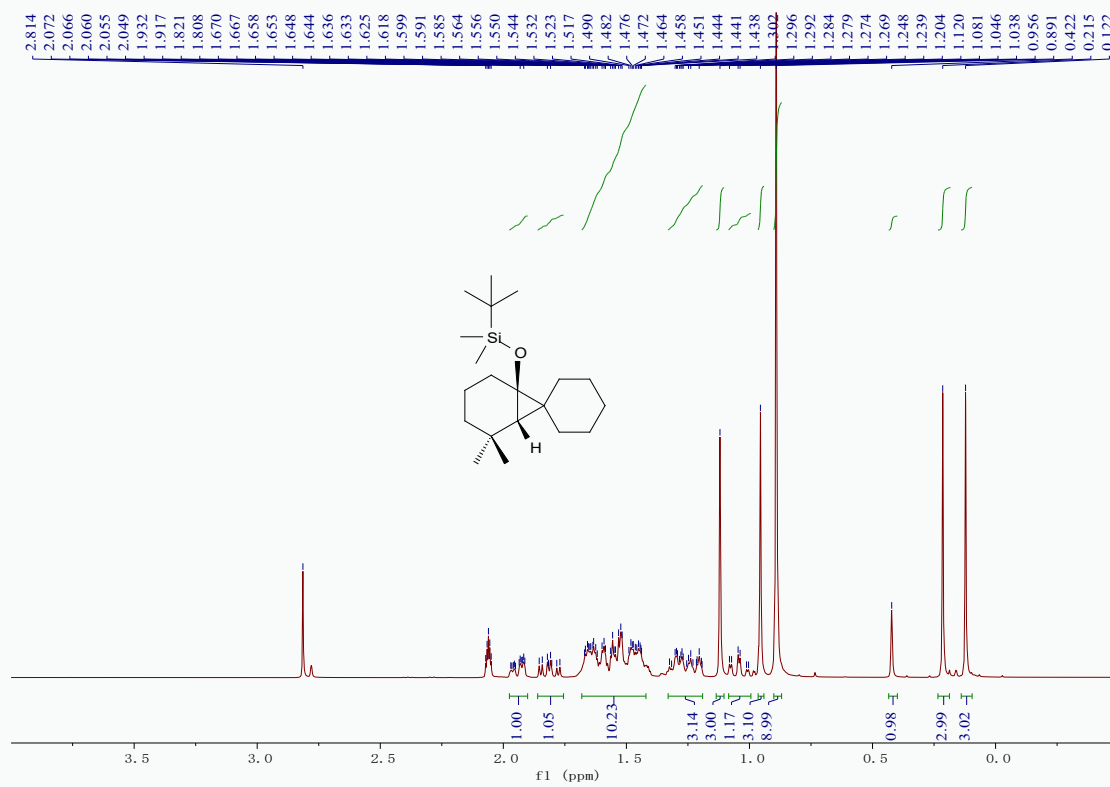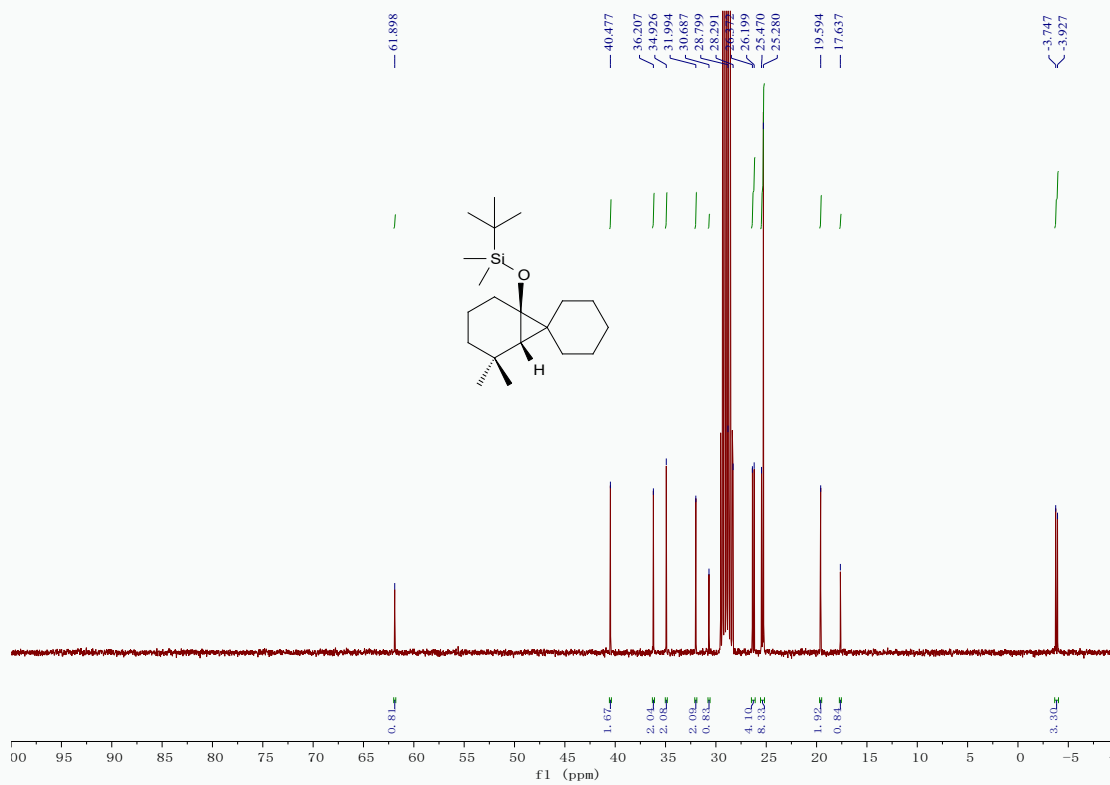

tert-butyl(((1*S*,5*R*,6*R*)-6-(tert-butyl)-4,4-dimethylbicyclo[3.1.0]hexan-1-yl)oxy) dimethylsilane (**3s**) (Using Acetone-*d*<sub>6</sub> as solvent)

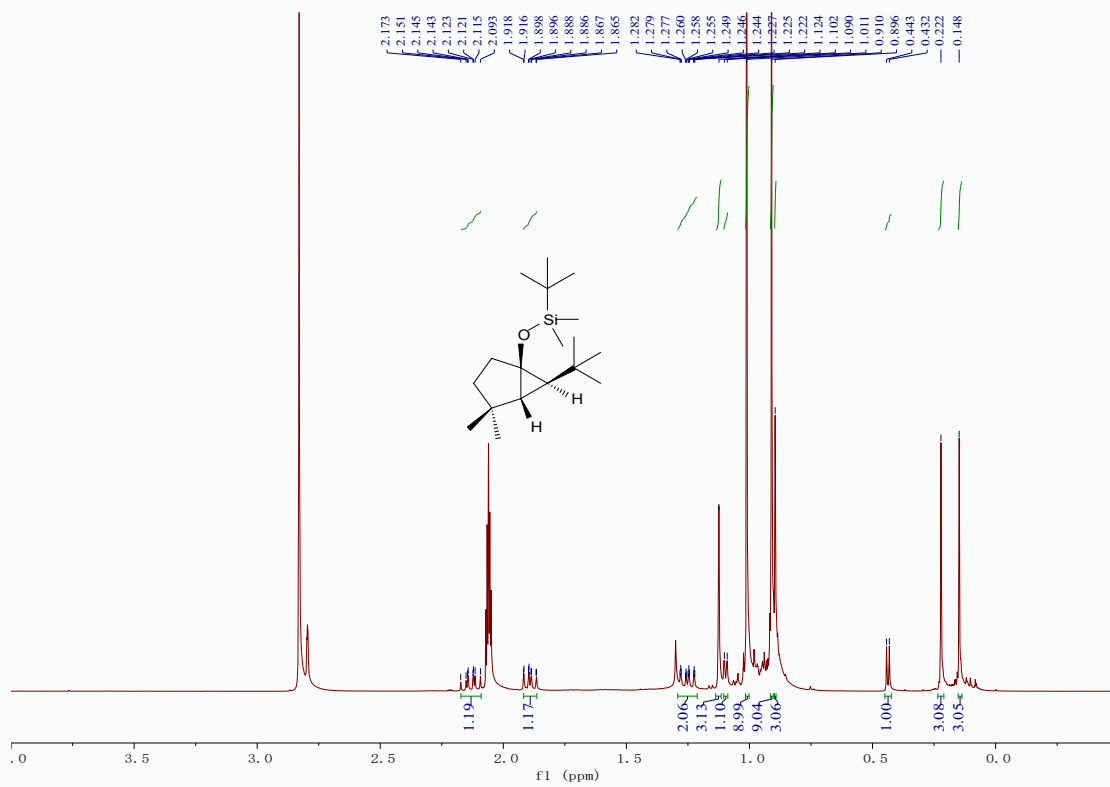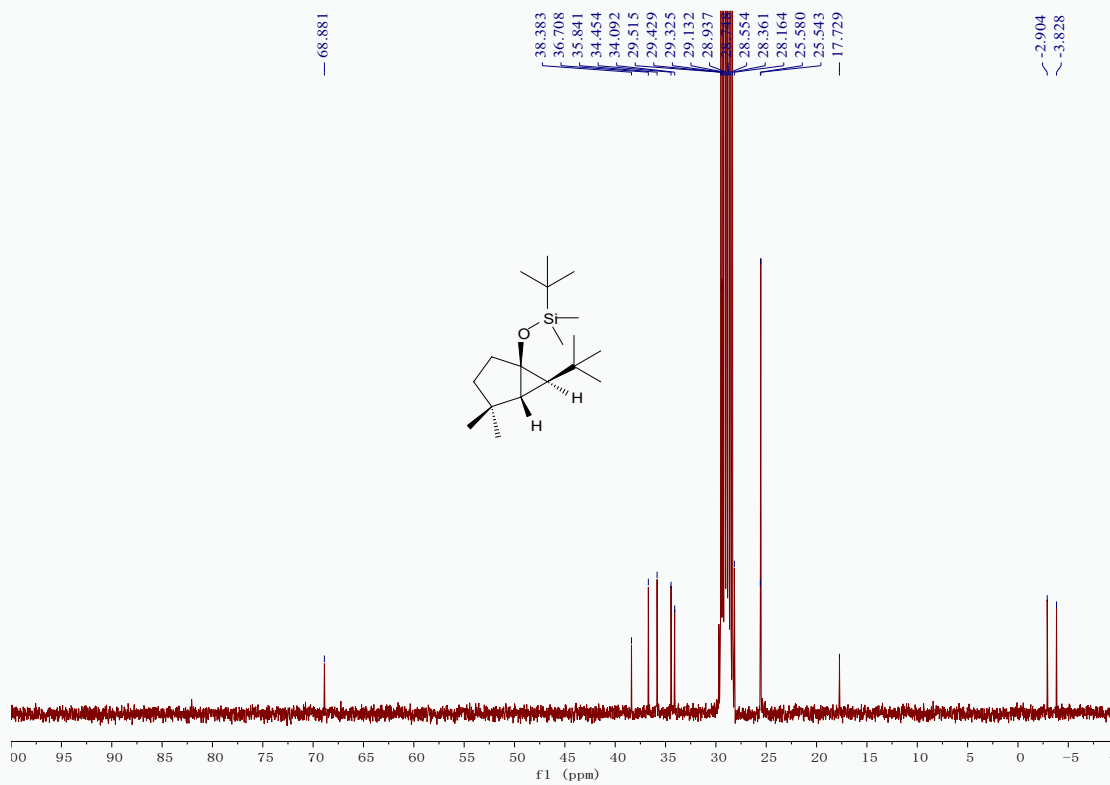

(((1*R*,5*R*,6*R*)-6-((1*r*,3*R*)-adamantan-1-yl)-4,4-dimethylbicyclo[3.1.0]hexan-1-yl) oxy)(tert-butyl)dimethylsilane (**3t**) (Using Acetone-*d*<sub>6</sub> as solvent)

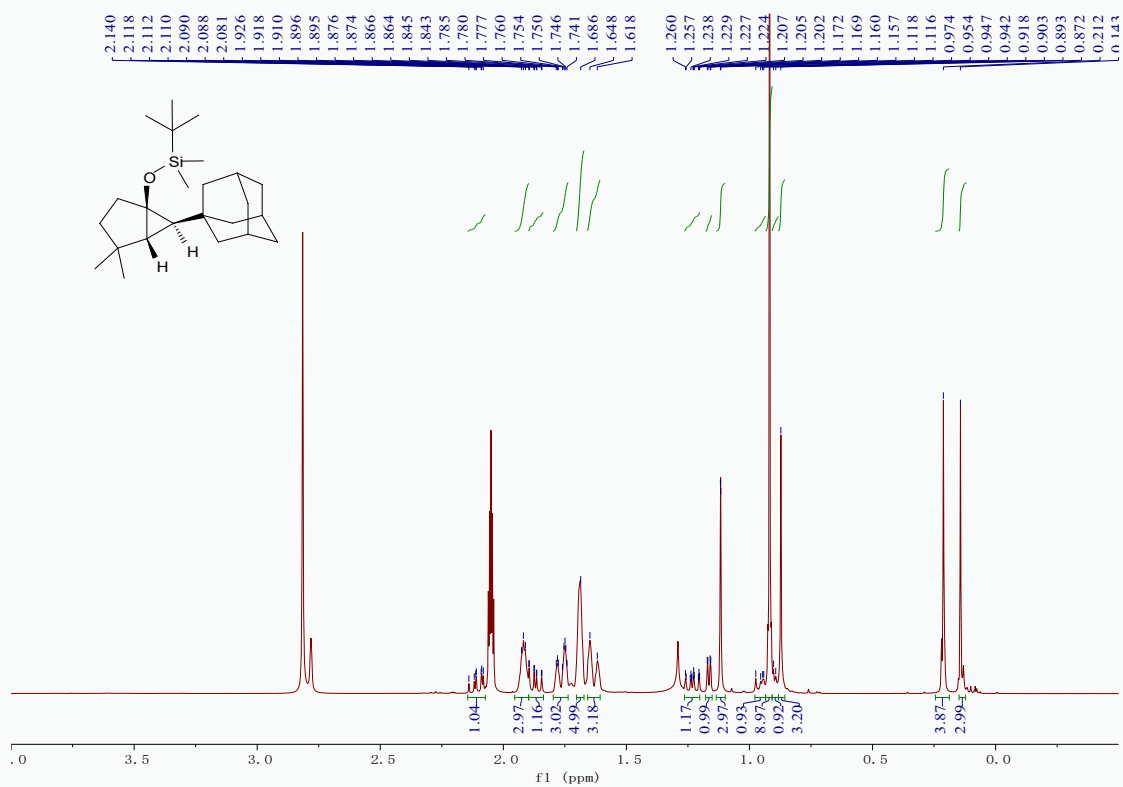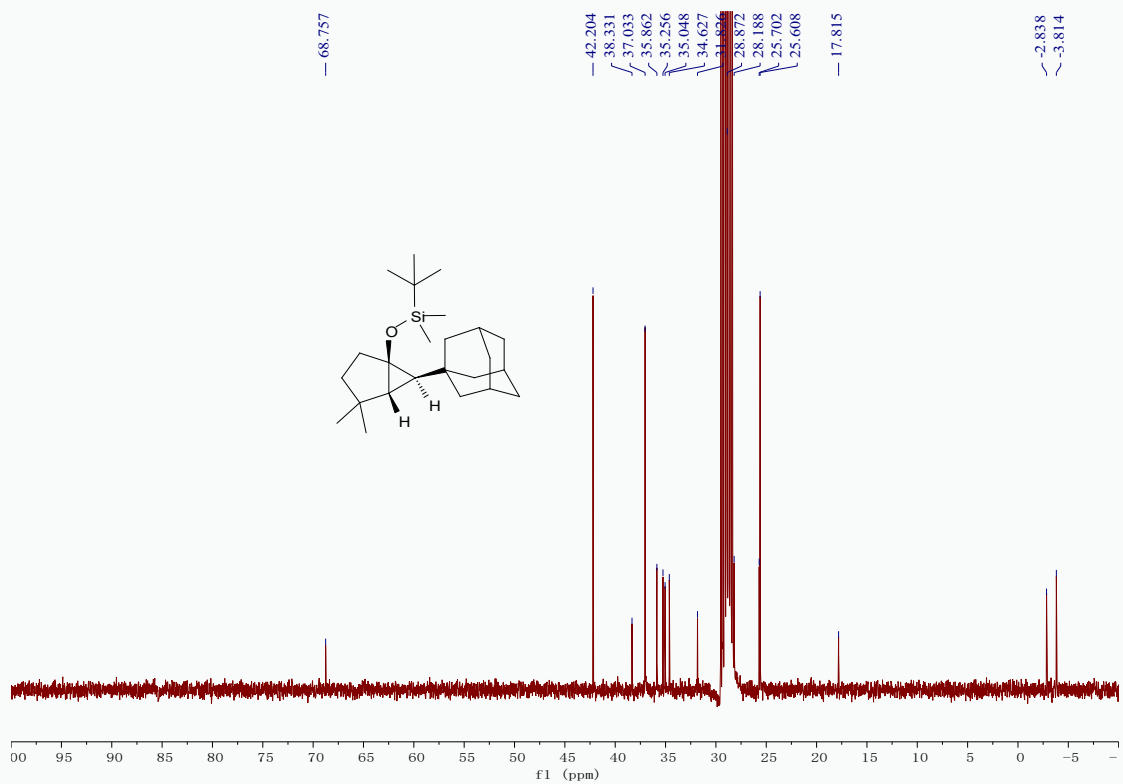

(8*R*, 9*S*, 13*S*, 14*S*)-13-methyl-17-oxo-7,8,9,11,12,13,14,15,16,17-decahydro-6H-cyclopenta[*a*]phenanthren-3-yl 5-(6-((*tert*-butyldimethylsilyloxy)-7-ethyl-2-methylbicyclo[4.1.0]heptan-2-yl)pentanoate (**3u**) (Using Acetone-*d*<sub>6</sub> as solvent)

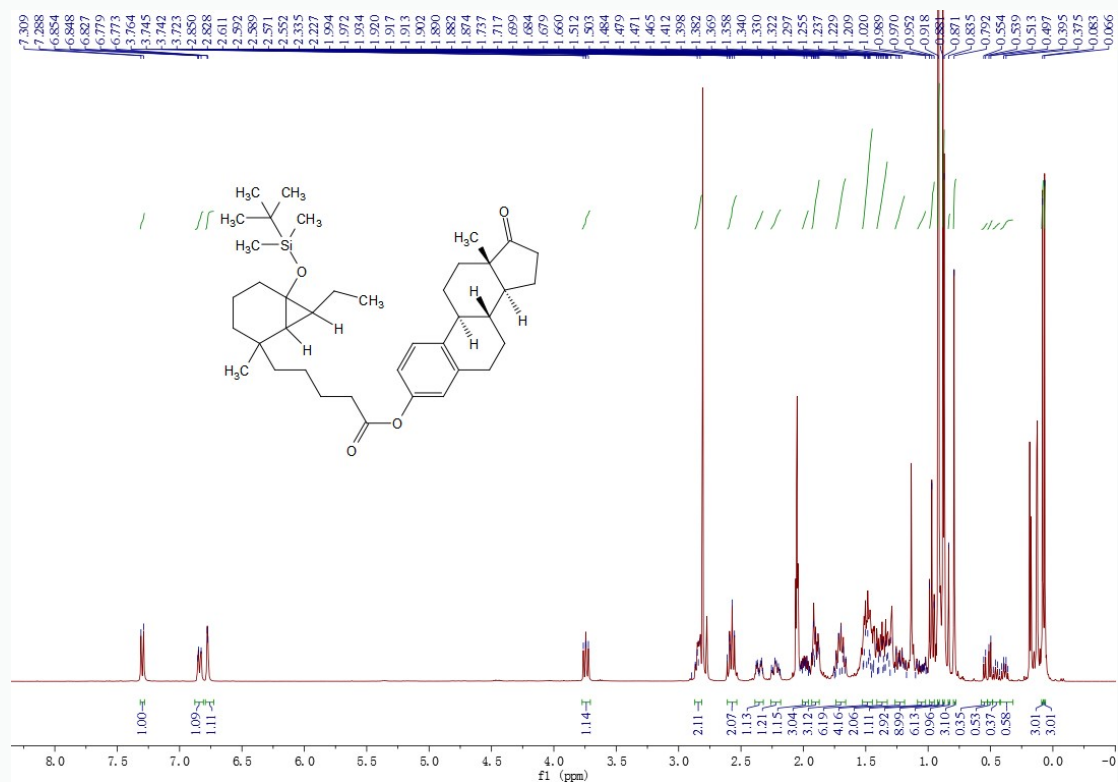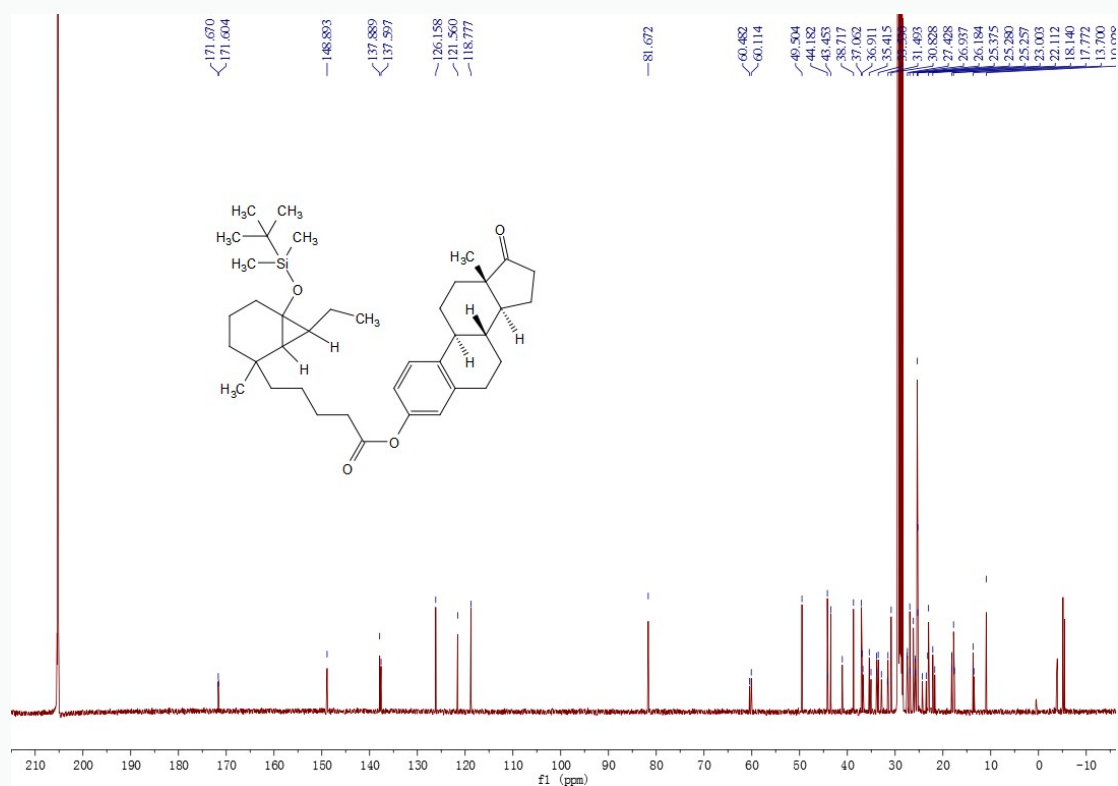

tert-butyl(((1*S*, 3*aS*, 5*aR*, 5*bR*, 7*aR*, 9*S*, 11*aR*, 11*bR*, 13*aR*, 13*bR*)-9-((tert-butyl dimethylsilyl)oxy)-1-((2*R*)-1-(6-((tert-butyl dimethylsilyl)oxy)-7-ethyl-2-methylbicyclo[4.1.0]heptan-2-yl)propan-2-yl)-5*a*,5*b*,8,8,11*a*-pentamethylcosahydro-3*aH*-cyclopenta[*a*]chrysen-3*a*-yl)methoxy) dimethylsilane (**3v**) (Using Acetone-*d*<sub>6</sub> as solvent)

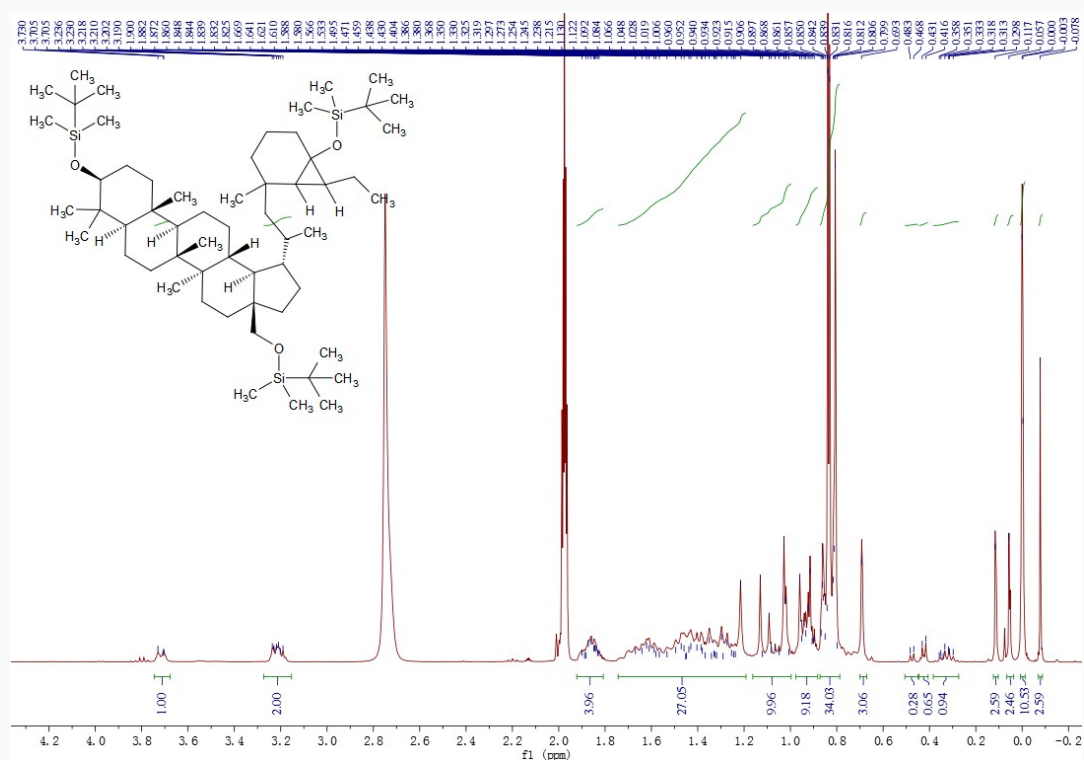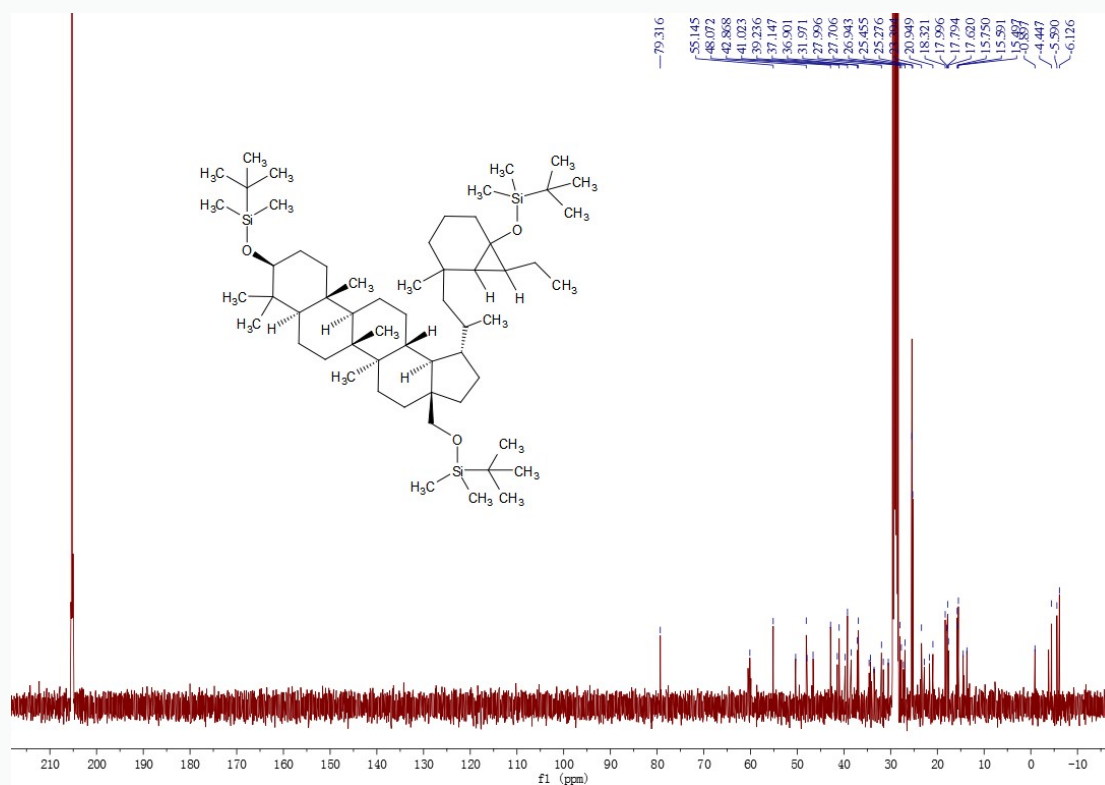





(1*S*, 6*R*, 7*R*)-7-(tert-butyl)-5,5-dimethylbicyclo[4.1.0]heptan-1-ol (**3a'**) (Using Acetone-*d*<sub>6</sub> as solvent)

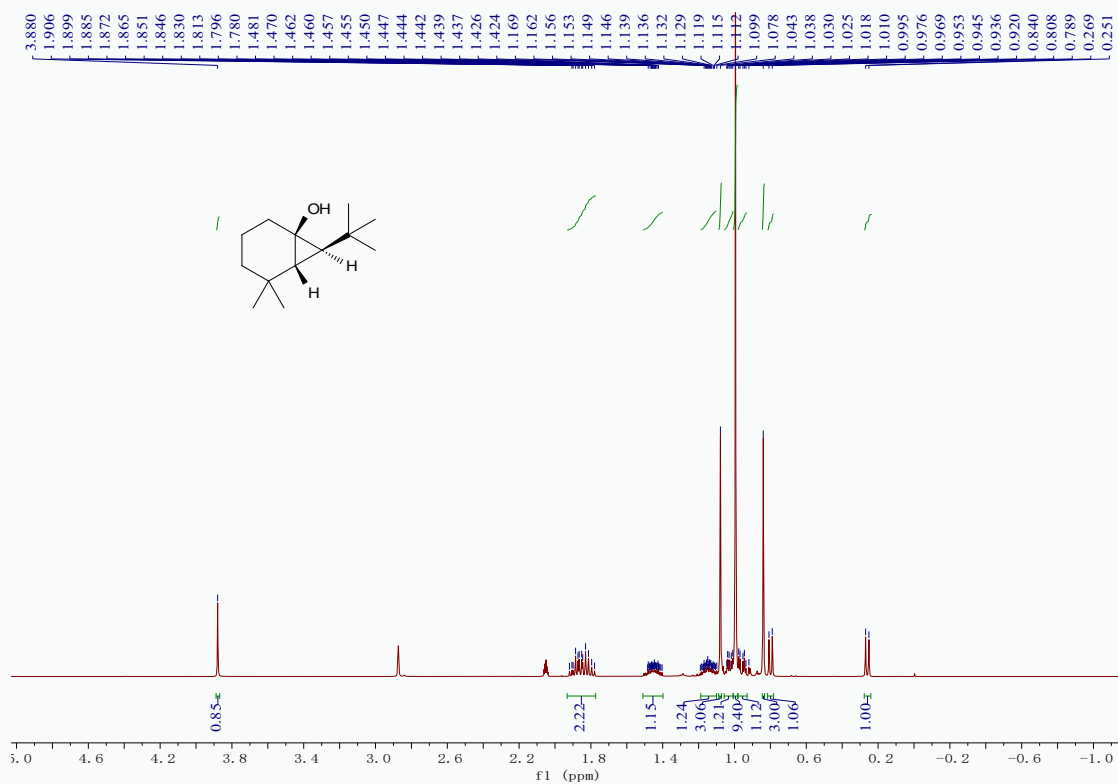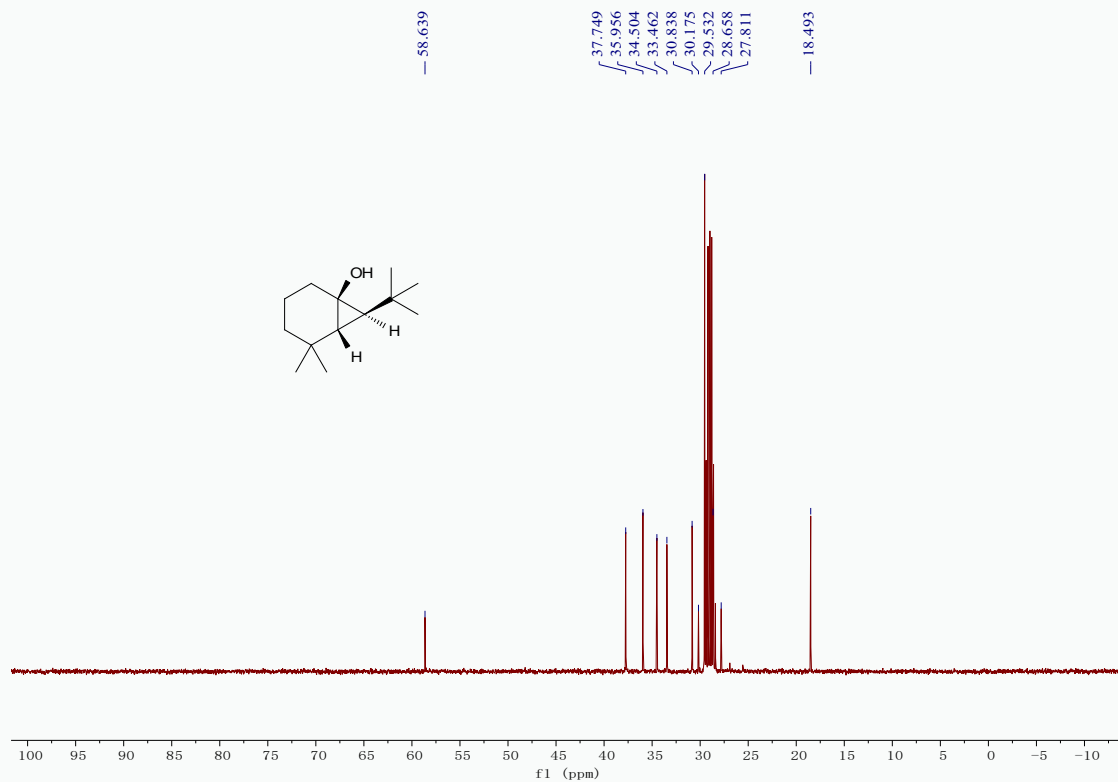

(1*S*,6*R*,7*R*)-7-(tert-butyl)-5-methyl-5-(methyl-d)bicyclo[4.1.0]heptan-1-ol (*d*-**3a'** and *epi-d*-**3a'**) (Using Acetone-*d*<sub>6</sub> as solvent)

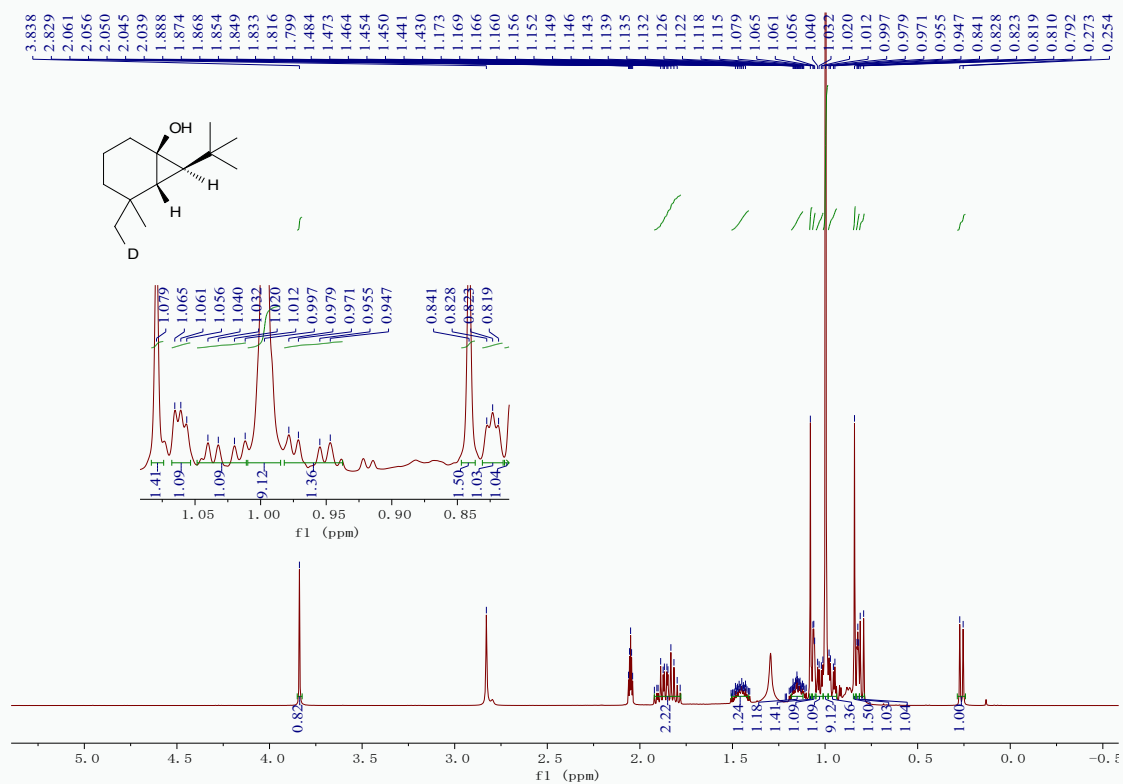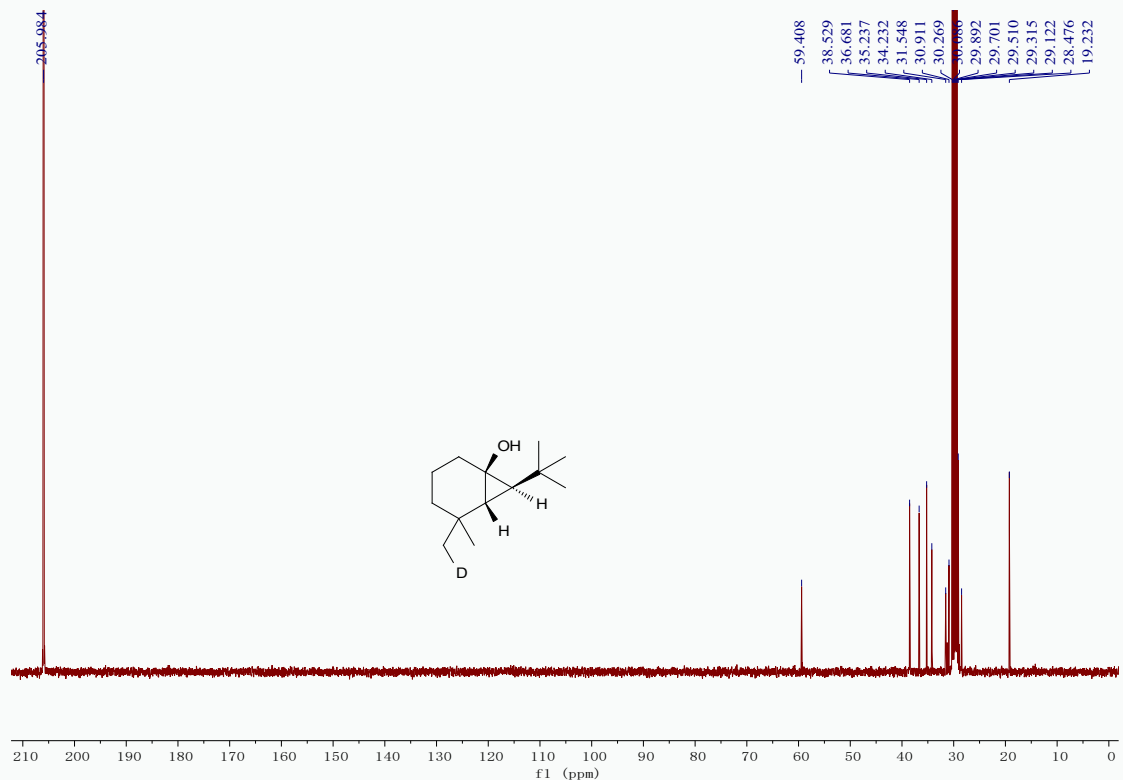

competitive experimental study, **3a'**

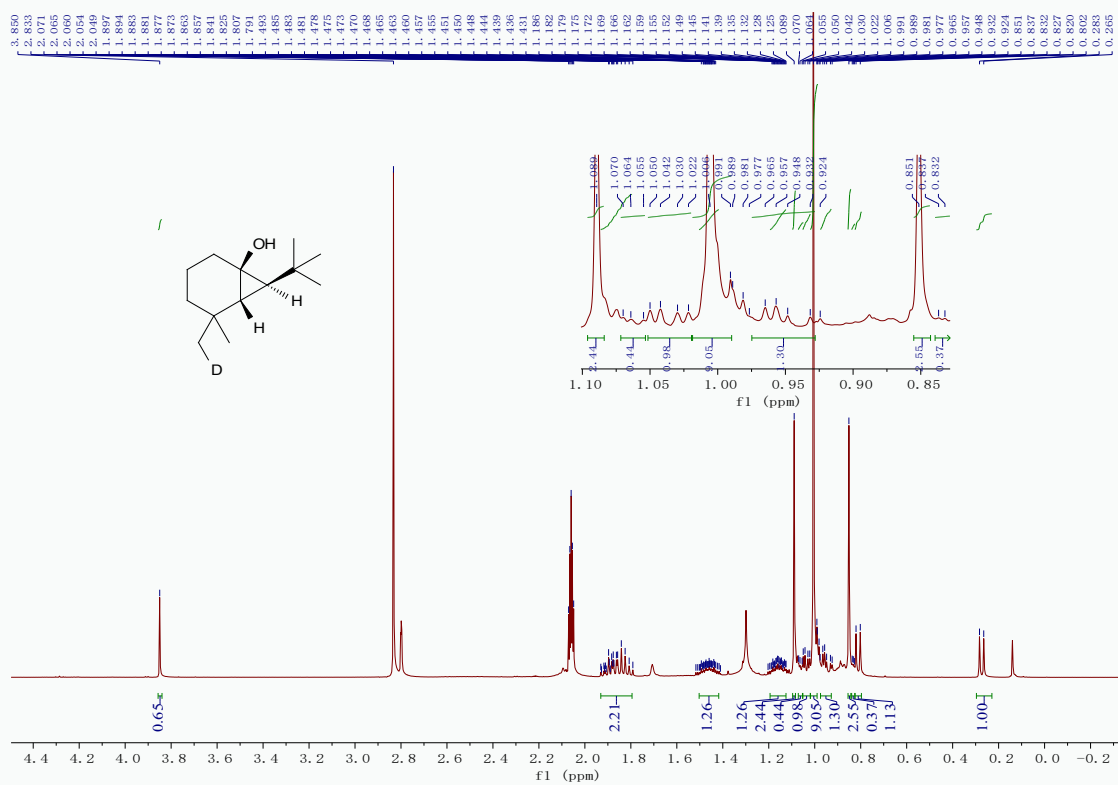

*(E)*-2-(but-1-en-1-yl)-3,3-dimethylcyclohexan-1-one (**7**) (Using CD<sub>3</sub>OD as solvent)

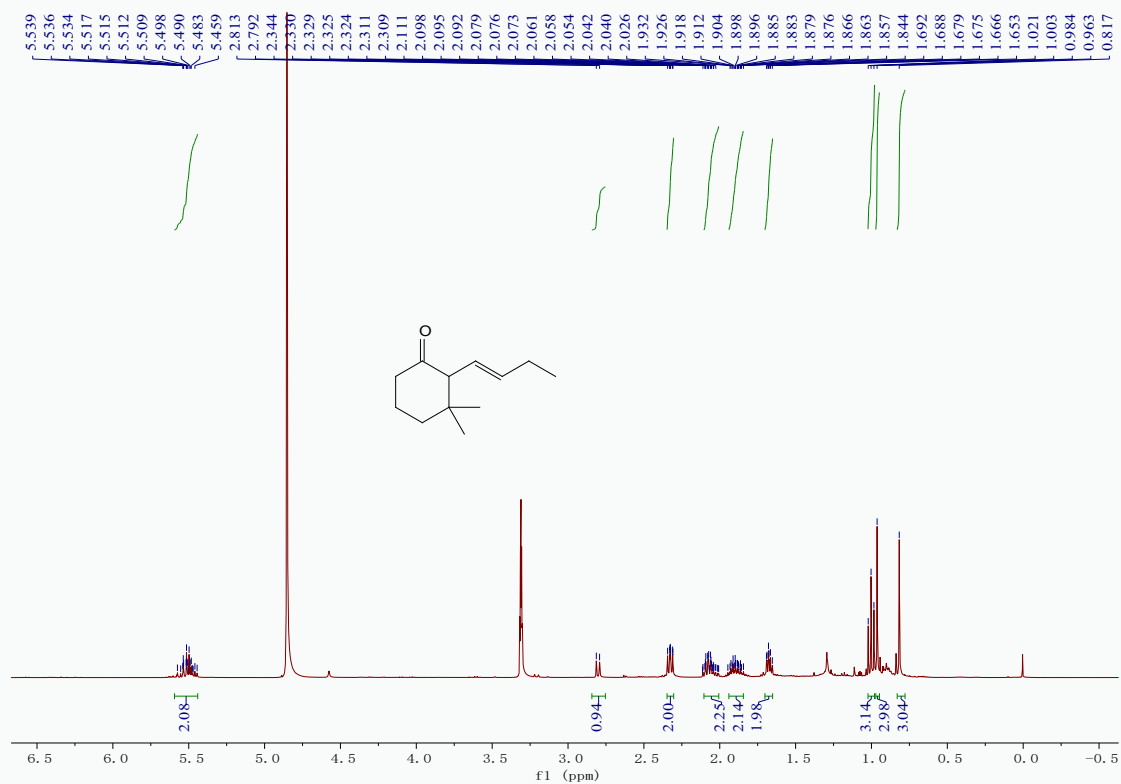

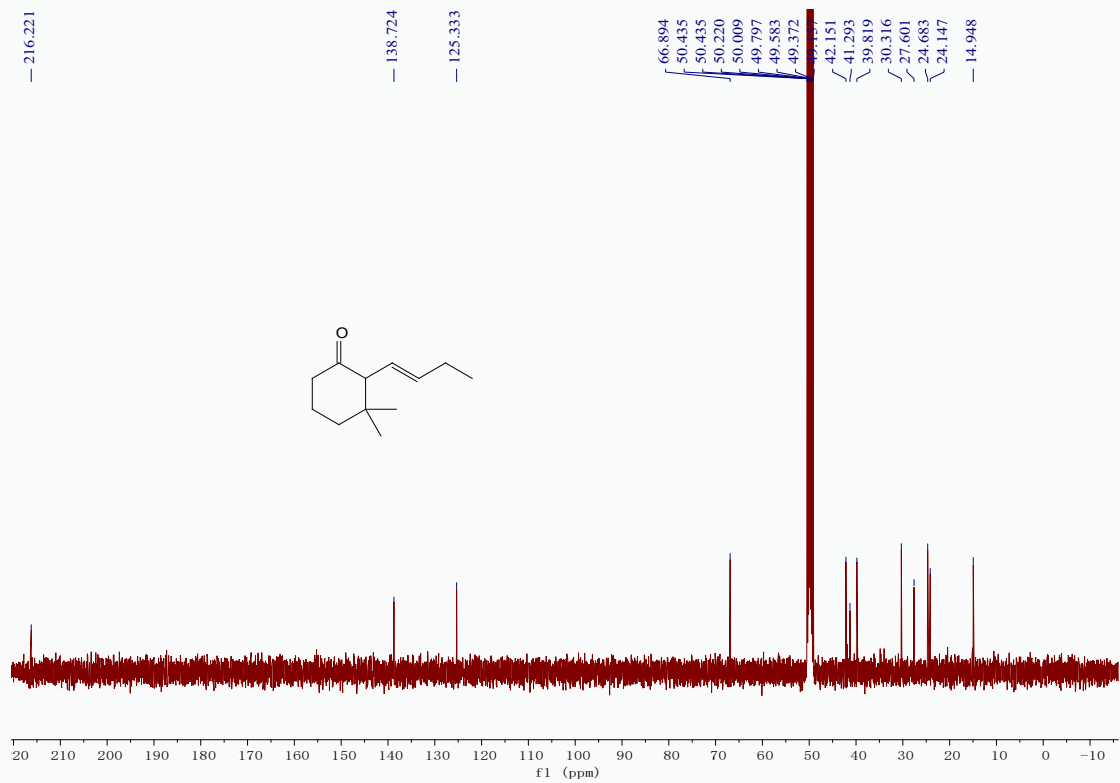

(*E*)-2-butylidene-3,3-dimethylcyclohexan-1-one (**8**) (Using CD<sub>3</sub>OD as solvent)

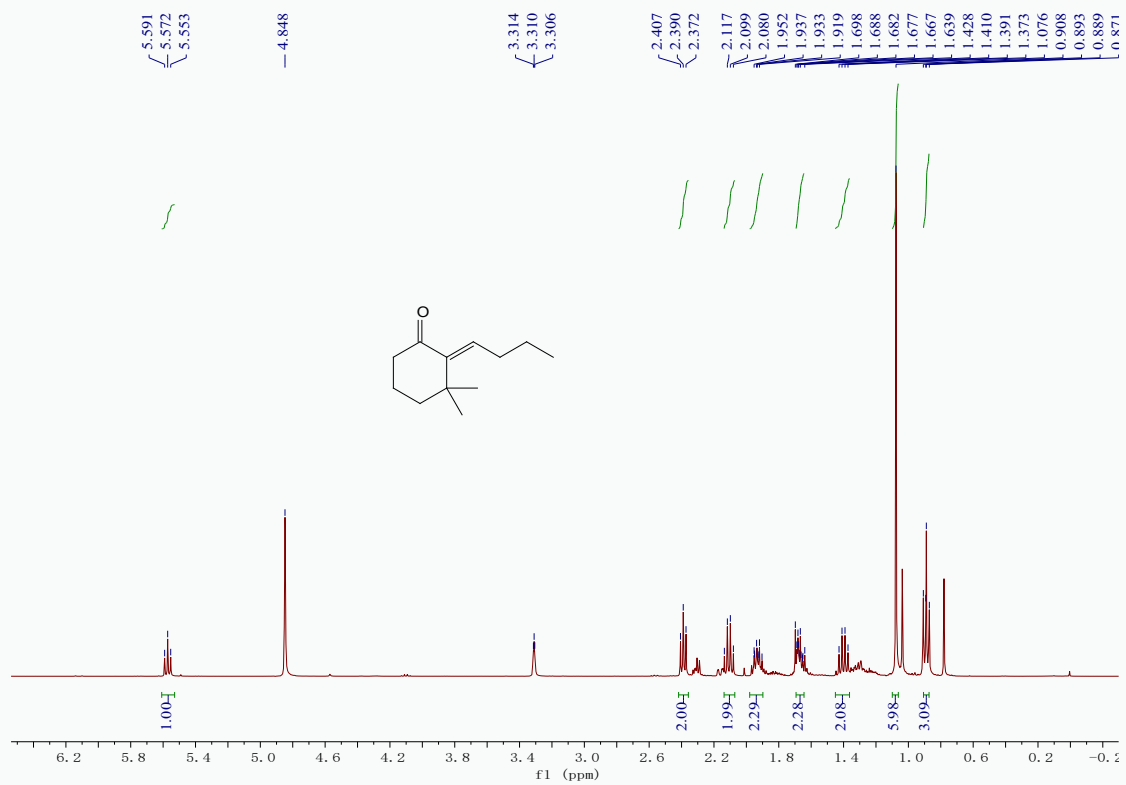

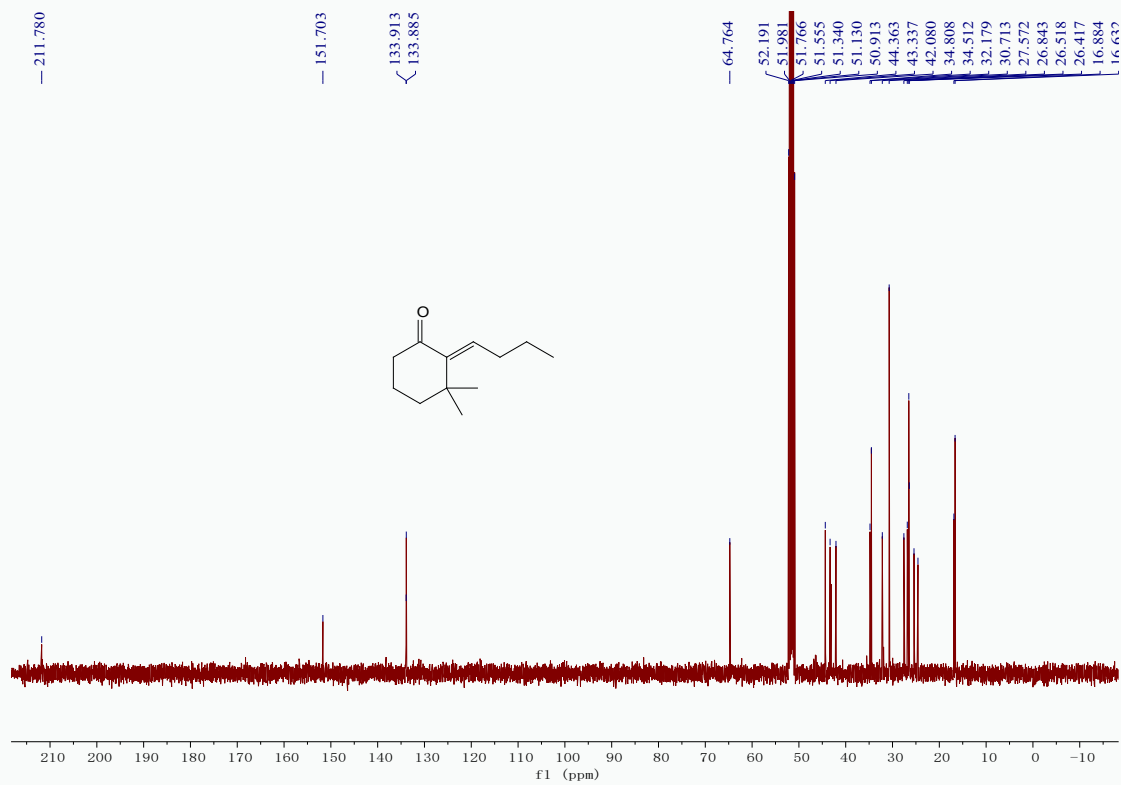

methyl 3-((tert-butyldimethylsilyl)oxy)propanoate (**21**) (Using CDCl<sub>3</sub> as solvent)

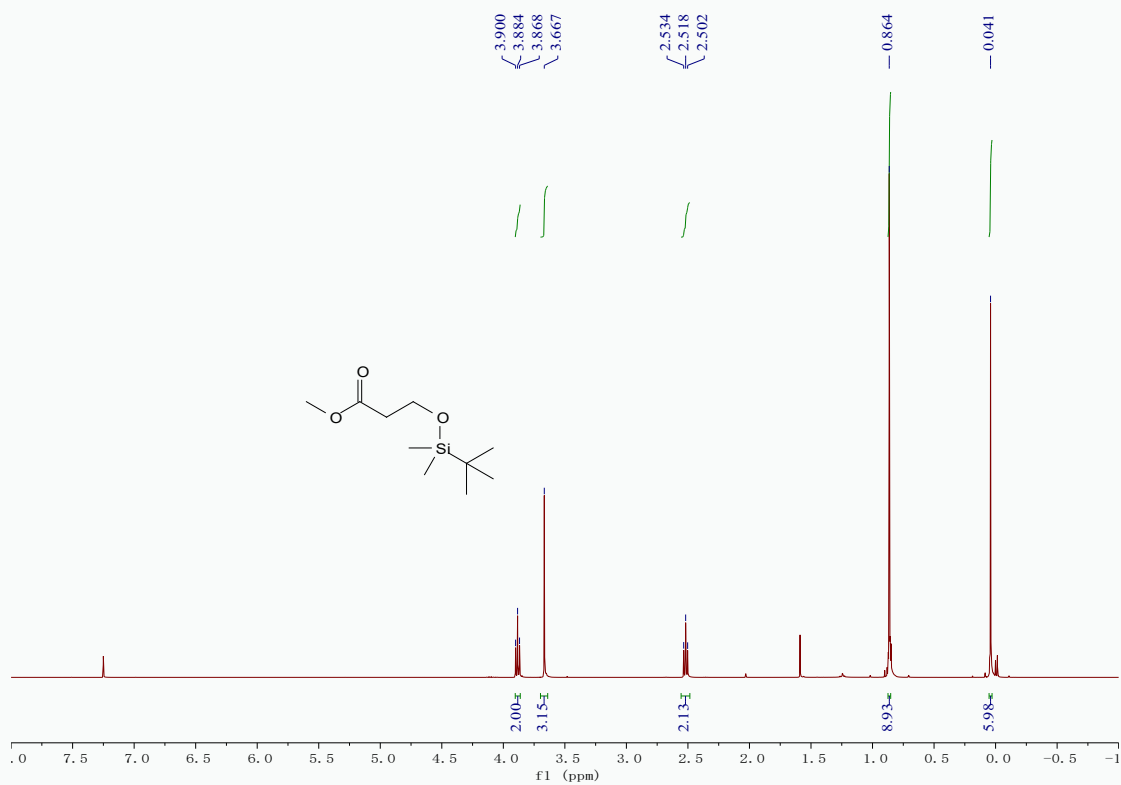

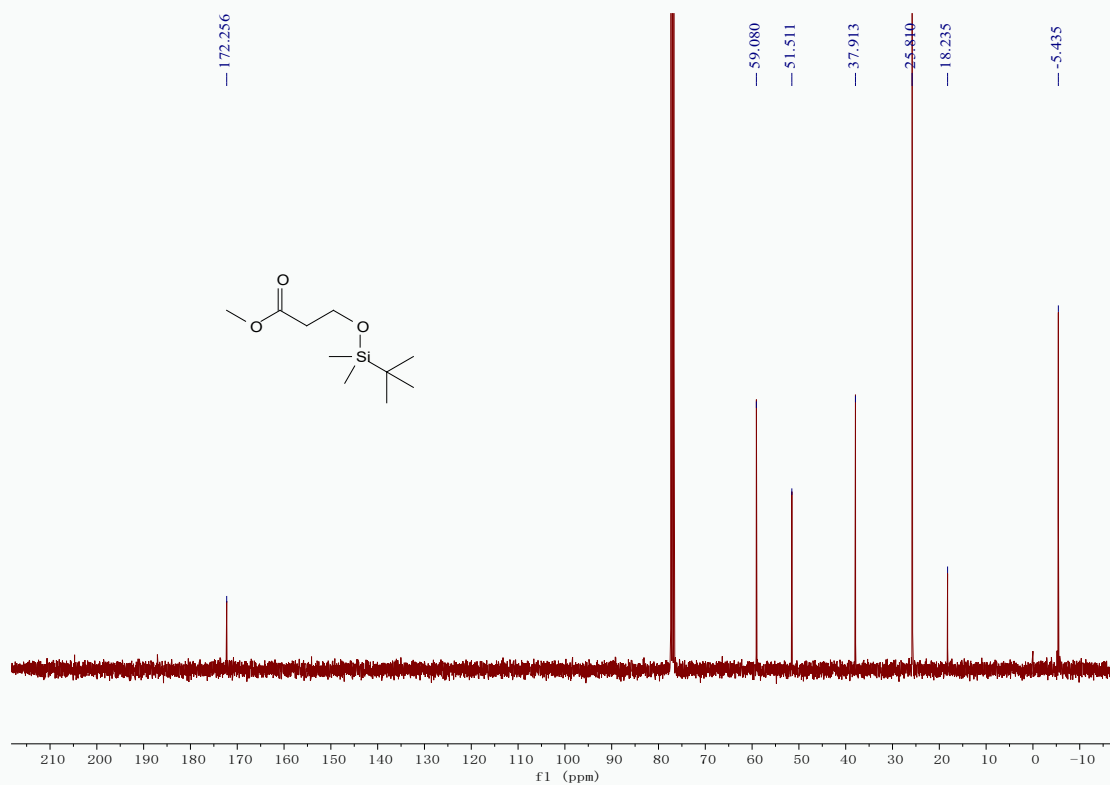

3-((tert-butyldimethylsilyl)oxy)propanal-1-d (**23**) (Using CDCl<sub>3</sub> as solvent)

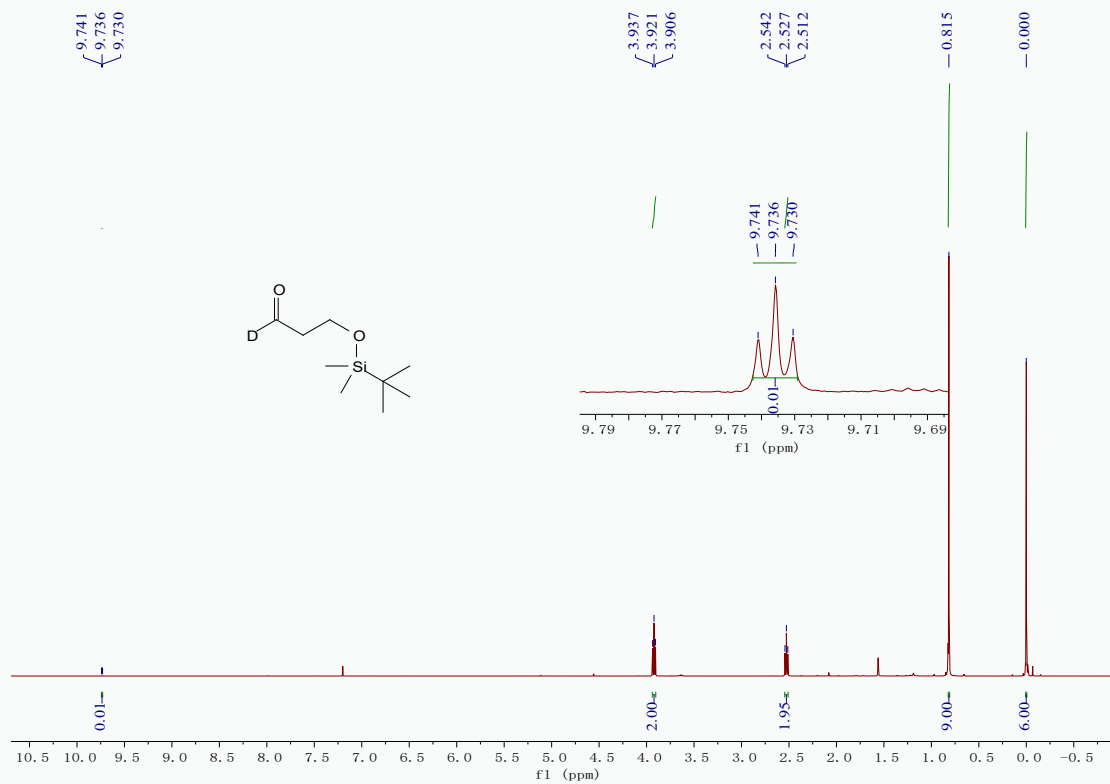

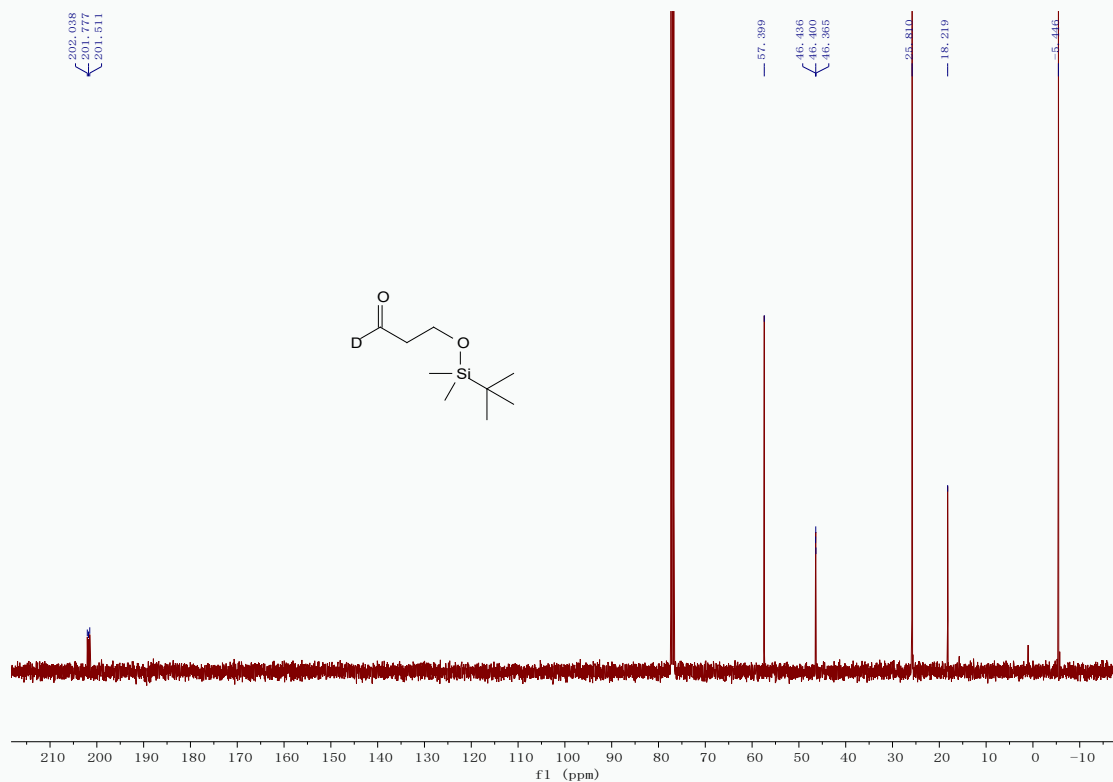

(*E*)-1-((tert-butyldimethylsilyl)oxy)-9-methyldeca-3,9-dien-5-one-3-d (*d-2e*) (Using CDCl<sub>3</sub> as solvent)

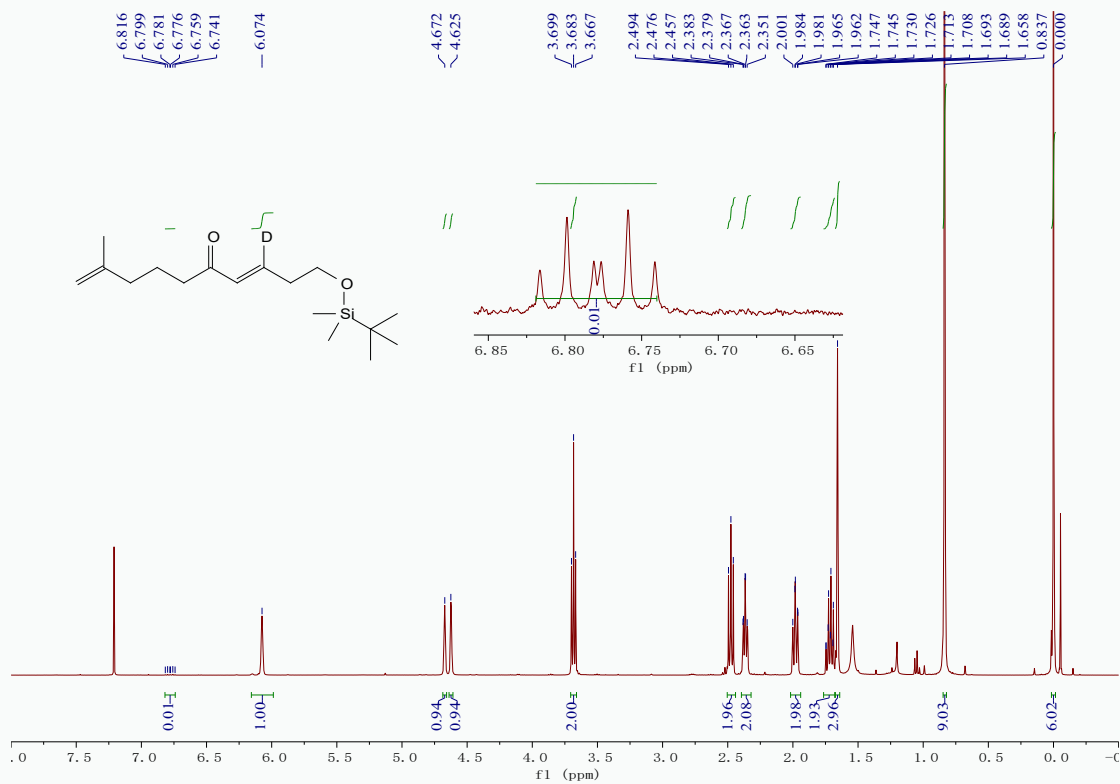





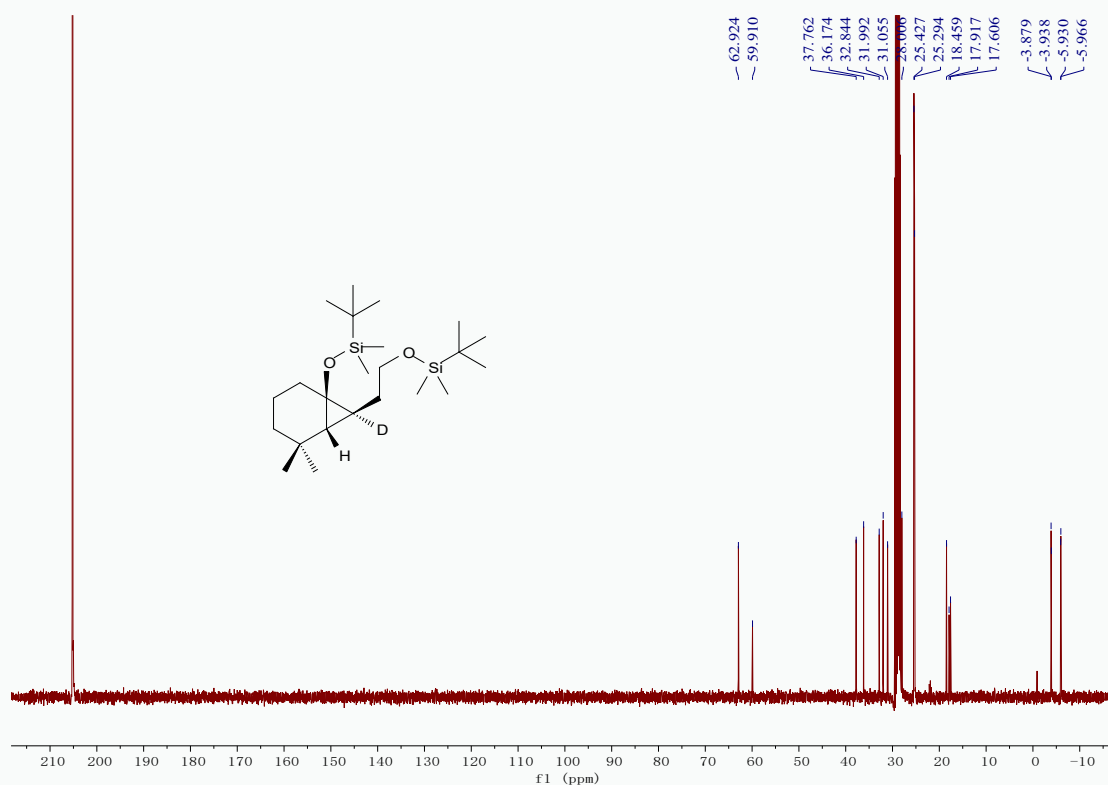

## 8. Computational procedures

All calculations were carried out using Gaussian 09 software package<sup>[10]</sup>. Since the DFT functional combined method has been demonstrated to generate accurate results for organometallics especially in the description of non-covalent interactions, the geometric structures of the intermediates and transition states were full-optimized at the B3LYP/6-31G(d,p) level in the gas-phase<sup>[11]</sup>. Frequency analyses were also performed on the optimized structures to confirm that the intermediates are local minima and the transition states have only one imaginary frequency. The solvation effect was considered into single-point calculation at the M06(PCM, *n*-PrOH)/6-311G(d,p) level<sup>[12]</sup>. This model was used for single-point energy calculations based on B3LYP-optimized geometries. The main discussion was based on Gibbs free energies in the solution phase, which was obtained from the addition of solvation single-point energy and gas-phase thermal correction to Gibbs free energies.

### Summary of energies

Table SX: Total energies (in a.u.) of various species in the reaction.

| Species                 | B3LYP/6-31G(d,p) |            | M06/6-311G(d,p) |
|-------------------------|------------------|------------|-----------------|
|                         | ZPG              | G          | PCM-SCF         |
| H-Fe(acac) <sub>2</sub> | 0.180122         | -1954.5042 | -1954.424057    |

|                               |          |              |              |
|-------------------------------|----------|--------------|--------------|
| Substrate                     | 0.275099 | -583.57672   | -583.5370484 |
| n-PrOH                        | 0.081121 | -194.278245  | -194.2734448 |
| IM0                           | 0.478446 | -2538.08589  | -2537.981025 |
| TS1                           | 0.478719 | -2538.071736 | -2537.960085 |
| IM1                           | 0.486772 | -2538.084969 | -2538.019101 |
| TS2                           | 0.486044 | -2538.071215 | -2537.996743 |
| IM2                           | 0.486996 | -2538.094099 | -2538.020305 |
| anti-TS3                      | 0.488638 | -2538.091264 | -2538.017479 |
| anti-IM3                      | 0.494827 | -2538.117945 | -2538.056556 |
| syn-TS3                       | 0.490132 | -2538.068462 | -2537.998589 |
| syn-IM3                       | 0.493981 | -2538.097548 | -2538.048489 |
| Iso-TS3                       | 0.487235 | -2538.072403 | -2537.994889 |
| Iso-IM3                       | 0.493443 | -2538.114603 | -2538.048489 |
| TS4                           | 0.591353 | -2732.378178 | -2732.337232 |
| IM4                           | 0.593547 | -2732.387779 | -2732.350642 |
| TS5                           | 0.459373 | -2863.593506 | -2863.500936 |
| Pro                           | 0.307937 | -584.757134  | -584.7622298 |
| Ph(iPrO)-<br>SiH <sub>2</sub> | 0.168714 | -715.990189  | -715.9309611 |
| Ph(iPrO)(nPrOH)SiH            | 0.247981 | -909.125157  | -909.0611194 |

### Optimized Structures

#### H-Fe(acac)<sub>2</sub>

Standard orientation:

| Center<br>Number | Atomic<br>Number | Atomic<br>Type | Coordinates (Angstroms) |           |           |
|------------------|------------------|----------------|-------------------------|-----------|-----------|
|                  |                  |                | X                       | Y         | Z         |
| 1                | 8                | 0              | 1.340080                | 1.356347  | 0.154399  |
| 2                | 8                | 0              | 1.339173                | -1.356577 | 0.153074  |
| 3                | 6                | 0              | 2.563958                | 1.230728  | -0.194429 |
| 4                | 6                | 0              | 2.563176                | -1.231396 | -0.195589 |
| 5                | 6                | 0              | 3.209678                | -0.000465 | -0.386100 |
| 6                | 6                | 0              | 3.315559                | 2.524372  | -0.400444 |
| 7                | 1                | 0              | 3.306881                | 3.097045  | 0.532814  |
| 8                | 1                | 0              | 2.795200                | 3.128653  | -1.150521 |
| 9                | 6                | 0              | 3.313981                | -2.525336 | -0.402601 |
| 10               | 1                | 0              | 2.792911                | -3.129029 | -1.152650 |
| 11               | 1                | 0              | 4.346569                | -2.365307 | -0.718594 |
| 12               | 1                | 0              | 4.249895                | -0.000659 | -0.686339 |
| 13               | 1                | 0              | 4.348224                | 2.363956  | -0.715989 |
| 14               | 1                | 0              | 3.305528                | -3.098416 | 0.530418  |
| 15               | 26               | 0              | 0.000015                | -0.000037 | 0.707169  |

|    |   |   |           |           |           |
|----|---|---|-----------|-----------|-----------|
| 16 | 8 | 0 | -1.339165 | 1.356557  | 0.153130  |
| 17 | 8 | 0 | -1.340162 | -1.356349 | 0.154546  |
| 18 | 6 | 0 | -2.563972 | -1.230716 | -0.194510 |
| 19 | 6 | 0 | -2.563143 | 1.231417  | -0.195611 |
| 20 | 6 | 0 | -3.209629 | 0.000495  | -0.386321 |
| 21 | 6 | 0 | -3.315632 | -2.524344 | -0.400414 |
| 22 | 1 | 0 | -4.347901 | -2.363920 | -0.717250 |
| 23 | 1 | 0 | -2.794533 | -3.129354 | -1.149376 |
| 24 | 1 | 0 | -3.308218 | -3.096271 | 0.533323  |
| 25 | 1 | 0 | -4.249809 | 0.000715  | -0.686687 |
| 26 | 6 | 0 | -3.313950 | 2.525379  | -0.402486 |
| 27 | 1 | 0 | -2.792747 | 3.129275  | -1.152278 |
| 28 | 1 | 0 | -3.305709 | 3.098232  | 0.530675  |
| 29 | 1 | 0 | -4.346471 | 2.365391  | -0.718720 |
| 30 | 1 | 0 | 0.000200  | 0.000030  | 2.364634  |

-----

**Substrate**

Standard orientation:

| Center<br>Number | Atomic<br>Number | Atomic<br>Type | Coordinates (Angstroms) |           |           |
|------------------|------------------|----------------|-------------------------|-----------|-----------|
|                  |                  |                | X                       | Y         | Z         |
| 1                | 6                | 0              | -1.704279               | 0.163710  | -0.919630 |
| 2                | 6                | 0              | -0.759007               | 1.367339  | -1.145518 |
| 3                | 6                | 0              | 0.030976                | 1.736394  | 0.105804  |
| 4                | 6                | 0              | 1.300525                | 1.037671  | 0.431072  |
| 5                | 6                | 0              | -3.747271               | -0.733904 | 0.330899  |
| 6                | 6                | 0              | 1.897590                | 0.095043  | -0.314272 |
| 7                | 1                | 0              | -2.136853               | -0.110487 | -1.888903 |
| 8                | 1                | 0              | -1.124788               | -0.703858 | -0.580961 |
| 9                | 1                | 0              | -1.346938               | 2.249800  | -1.416297 |
| 10               | 1                | 0              | -0.084148               | 1.146695  | -1.979371 |
| 11               | 8                | 0              | -0.393040               | 2.591169  | 0.875297  |
| 12               | 1                | 0              | 1.732580                | 1.367191  | 1.372196  |
| 13               | 6                | 0              | -4.628428               | -1.157764 | -0.819844 |
| 14               | 6                | 0              | 3.187394                | -0.640392 | -0.012596 |
| 15               | 6                | 0              | 4.167037                | -0.382191 | -1.182694 |
| 16               | 6                | 0              | 2.866911                | -2.153352 | 0.052088  |
| 17               | 6                | 0              | 3.833840                | -0.193461 | 1.308457  |
| 18               | 1                | 0              | 1.431215                | -0.206175 | -1.253061 |
| 19               | 1                | 0              | -5.259994               | -0.325023 | -1.156087 |
| 20               | 1                | 0              | -4.038543               | -1.471708 | -1.690050 |
| 21               | 1                | 0              | -5.281484               | -1.989332 | -0.541705 |
| 22               | 1                | 0              | 5.094213                | -0.946849 | -1.035199 |
| 23               | 1                | 0              | 3.734880                | -0.692859 | -2.140382 |
| 24               | 1                | 0              | 3.784453                | -2.731009 | 0.209203  |
| 25               | 1                | 0              | 4.760819                | -0.750033 | 1.480909  |
| 26               | 1                | 0              | 4.082923                | 0.872490  | 1.292988  |
| 27               | 1                | 0              | 3.172348                | -0.375442 | 2.161496  |
| 28               | 1                | 0              | 4.422722                | 0.679684  | -1.256093 |
| 29               | 1                | 0              | 2.178966                | -2.375740 | 0.873997  |
| 30               | 1                | 0              | 2.406052                | -2.503496 | -0.878203 |
| 31               | 6                | 0              | -3.779112               | -1.365555 | 1.509232  |

|    |   |   |           |           |           |
|----|---|---|-----------|-----------|-----------|
| 32 | 1 | 0 | -3.152740 | -1.052715 | 2.340351  |
| 33 | 1 | 0 | -4.435332 | -2.213819 | 1.685775  |
| 34 | 6 | 0 | -2.830171 | 0.448733  | 0.094720  |
| 35 | 1 | 0 | -3.420124 | 1.300845  | -0.274006 |
| 36 | 1 | 0 | -2.391936 | 0.768863  | 1.044722  |

-----  
**n-PrOH**

Standard orientation:

| Center<br>Number | Atomic<br>Number | Atomic<br>Type | Coordinates (Angstroms) |           |           |
|------------------|------------------|----------------|-------------------------|-----------|-----------|
|                  |                  |                | X                       | Y         | Z         |
| 1                | 8                | 0              | 1.382174                | -0.637158 | -0.219660 |
| 2                | 6                | 0              | 0.772252                | 0.543796  | 0.291379  |
| 3                | 6                | 0              | -0.634229               | 0.643957  | -0.288533 |
| 4                | 6                | 0              | -1.543268               | -0.515764 | 0.128977  |
| 5                | 1                | 0              | 2.246726                | -0.734844 | 0.197100  |
| 6                | 1                | 0              | -1.677857               | -0.539018 | 1.216952  |
| 7                | 1                | 0              | -2.534283               | -0.427405 | -0.327652 |
| 8                | 1                | 0              | -1.067174               | 1.601322  | 0.028834  |
| 9                | 1                | 0              | -0.552038               | 0.680588  | -1.381807 |
| 10               | 1                | 0              | 0.716032                | 0.516546  | 1.392929  |
| 11               | 1                | 0              | 1.351755                | 1.439825  | 0.014973  |
| 12               | 1                | 0              | -1.109085               | -1.471682 | -0.174992 |

-----  
**IM0**

Standard orientation:

| Center<br>Number | Atomic<br>Number | Atomic<br>Type | Coordinates (Angstroms) |           |           |
|------------------|------------------|----------------|-------------------------|-----------|-----------|
|                  |                  |                | X                       | Y         | Z         |
| 1                | 6                | 0              | 1.609172                | -3.148476 | 1.493992  |
| 2                | 6                | 0              | 2.422594                | -2.774764 | 0.240077  |
| 3                | 6                | 0              | 1.709948                | -1.836017 | -0.768191 |
| 4                | 6                | 0              | 1.666613                | -0.362395 | -0.417673 |
| 5                | 6                | 0              | 2.886683                | 0.464257  | -0.410378 |
| 6                | 6                | 0              | 1.216379                | -2.020443 | 2.416556  |
| 7                | 6                | 0              | 4.101571                | 0.070972  | -0.830712 |
| 8                | 1                | 0              | 2.218029                | -3.882586 | 2.047218  |
| 9                | 1                | 0              | 0.703050                | -3.681381 | 1.180268  |
| 10               | 1                | 0              | 2.657971                | -3.704982 | -0.291406 |
| 11               | 1                | 0              | 3.386852                | -2.344709 | 0.530866  |
| 12               | 1                | 0              | 0.681380                | -2.158856 | -0.945110 |
| 13               | 1                | 0              | 2.242629                | -1.908916 | -1.725111 |
| 14               | 8                | 0              | 0.600346                | 0.237977  | -0.208544 |
| 15               | 1                | 0              | 2.712824                | 1.478571  | -0.064094 |
| 16               | 6                | 0              | 2.317899                | -1.194288 | 3.040454  |
| 17               | 6                | 0              | -0.085262               | -1.792253 | 2.732470  |
| 18               | 6                | 0              | 5.366742                | 0.899163  | -0.884543 |
| 19               | 6                | 0              | 5.853228                | 0.925775  | -2.353853 |
| 20               | 6                | 0              | 6.432828                | 0.190296  | -0.013704 |
| 21               | 6                | 0              | 5.162583                | 2.336637  | -0.381260 |
| 22               | 1                | 0              | 4.226488                | -0.947291 | -1.198569 |
| 23               | 1                | 0              | 3.072040                | -0.858517 | 2.318701  |

|    |    |   |           |           |           |
|----|----|---|-----------|-----------|-----------|
| 24 | 1  | 0 | 1.911991  | -0.303160 | 3.528078  |
| 25 | 1  | 0 | 2.862210  | -1.768712 | 3.806133  |
| 26 | 1  | 0 | -0.331812 | -1.106639 | 3.536860  |
| 27 | 1  | 0 | -0.952704 | -0.686140 | 1.637975  |
| 28 | 1  | 0 | -0.844991 | -2.524900 | 2.475818  |
| 29 | 1  | 0 | 6.802919  | 1.466198  | -2.427799 |
| 30 | 1  | 0 | 6.012862  | -0.086860 | -2.740114 |
| 31 | 1  | 0 | 7.387094  | 0.724368  | -0.075835 |
| 32 | 1  | 0 | 6.104232  | 2.891195  | -0.442254 |
| 33 | 1  | 0 | 4.421345  | 2.871966  | -0.983051 |
| 34 | 1  | 0 | 4.831921  | 2.353773  | 0.661915  |
| 35 | 1  | 0 | 5.126006  | 1.424564  | -3.002054 |
| 36 | 1  | 0 | 6.127428  | 0.159316  | 1.036827  |
| 37 | 1  | 0 | 6.603031  | -0.838824 | -0.348088 |
| 38 | 26 | 0 | -1.464768 | 0.121197  | 0.185937  |
| 39 | 8  | 0 | -3.251773 | -0.725315 | 0.731328  |
| 40 | 8  | 0 | -2.645158 | 1.426690  | -0.950979 |
| 41 | 8  | 0 | -1.433730 | -1.179380 | -1.357364 |
| 42 | 8  | 0 | -1.123669 | 1.821852  | 1.300862  |
| 43 | 6  | 0 | -1.591042 | 3.004592  | 1.224991  |
| 44 | 6  | 0 | -2.934551 | 2.657700  | -0.813749 |
| 45 | 6  | 0 | -2.469715 | 3.470229  | 0.233150  |
| 46 | 6  | 0 | -1.122273 | 3.956582  | 2.307373  |
| 47 | 6  | 0 | -2.373500 | -1.940978 | -1.781589 |
| 48 | 6  | 0 | -3.969761 | -1.543022 | 0.077918  |
| 49 | 6  | 0 | -3.597651 | -2.154002 | -1.139712 |
| 50 | 6  | 0 | -2.082900 | -2.652530 | -3.086390 |
| 51 | 1  | 0 | -1.178963 | -3.261869 | -2.978834 |
| 52 | 1  | 0 | -2.906196 | -3.291406 | -3.412289 |
| 53 | 1  | 0 | -1.876688 | -1.908105 | -3.862538 |
| 54 | 1  | 0 | -4.302603 | -2.833412 | -1.602860 |
| 55 | 6  | 0 | -5.316262 | -1.869332 | 0.689817  |
| 56 | 1  | 0 | -5.897339 | -0.947207 | 0.793520  |
| 57 | 1  | 0 | -5.167320 | -2.268370 | 1.698265  |
| 58 | 1  | 0 | -5.886349 | -2.588620 | 0.098139  |
| 59 | 1  | 0 | -1.528448 | 4.963810  | 2.191128  |
| 60 | 1  | 0 | -0.028488 | 4.004937  | 2.297568  |
| 61 | 6  | 0 | -3.844747 | 3.243231  | -1.873598 |
| 62 | 1  | 0 | -4.776820 | 2.669909  | -1.905627 |
| 63 | 1  | 0 | -4.075094 | 4.296497  | -1.698334 |
| 64 | 1  | 0 | -2.787293 | 4.505186  | 0.268888  |
| 65 | 1  | 0 | -1.415819 | 3.561790  | 3.285629  |
| 66 | 1  | 0 | -3.370982 | 3.138064  | -2.855299 |

-----  
**IMO'**

Standard orientation:

| Center<br>Number | Atomic<br>Number | Atomic<br>Type | Coordinates (Angstroms) |           |           |
|------------------|------------------|----------------|-------------------------|-----------|-----------|
|                  |                  |                | X                       | Y         | Z         |
| 1                | 6                | 0              | -6.421925               | -0.680864 | -0.025042 |
| 2                | 6                | 0              | -5.128068               | -0.669445 | -0.850160 |
| 3                | 6                | 0              | -4.171873               | 0.464536  | -0.468441 |
| 4                | 6                | 0              | -2.876568               | 0.460733  | -1.274622 |

|    |    |   |           |           |           |
|----|----|---|-----------|-----------|-----------|
| 5  | 6  | 0 | -1.850293 | 1.500190  | -1.024919 |
| 6  | 6  | 0 | -6.326572 | -1.082326 | 1.436391  |
| 7  | 6  | 0 | -1.942510 | 2.464837  | -0.096090 |
| 8  | 1  | 0 | -7.144289 | -1.357899 | -0.506036 |
| 9  | 1  | 0 | -6.894735 | 0.311828  | -0.079135 |
| 10 | 1  | 0 | -5.384175 | -0.571051 | -1.910255 |
| 11 | 1  | 0 | -4.610710 | -1.630506 | -0.767049 |
| 12 | 1  | 0 | -3.921444 | 0.416937  | 0.598161  |
| 13 | 1  | 0 | -4.662970 | 1.437543  | -0.610425 |
| 14 | 8  | 0 | -2.681917 | -0.395085 | -2.133776 |
| 15 | 1  | 0 | -0.975826 | 1.412315  | -1.663732 |
| 16 | 6  | 0 | -5.255240 | -1.662096 | 1.988255  |
| 17 | 6  | 0 | -0.936886 | 3.552364  | 0.215083  |
| 18 | 6  | 0 | -0.431381 | 3.327972  | 1.661496  |
| 19 | 6  | 0 | -1.672901 | 4.911779  | 0.139779  |
| 20 | 6  | 0 | 0.256317  | 3.559667  | -0.753969 |
| 21 | 1  | 0 | -2.831526 | 2.498131  | 0.535349  |
| 22 | 1  | 0 | -4.351160 | -1.876129 | 1.427557  |
| 23 | 1  | 0 | -5.251587 | -1.953692 | 3.034854  |
| 24 | 1  | 0 | 0.255689  | 4.132138  | 1.949104  |
| 25 | 1  | 0 | -1.260587 | 3.325619  | 2.378085  |
| 26 | 1  | 0 | -0.994659 | 5.725759  | 0.418547  |
| 27 | 1  | 0 | 0.924413  | 4.392466  | -0.507294 |
| 28 | 1  | 0 | 0.839788  | 2.636453  | -0.694036 |
| 29 | 1  | 0 | -0.072304 | 3.695296  | -1.790015 |
| 30 | 1  | 0 | 0.097652  | 2.373956  | 1.747901  |
| 31 | 1  | 0 | -2.040554 | 5.108471  | -0.872902 |
| 32 | 1  | 0 | -2.529539 | 4.942127  | 0.822627  |
| 33 | 6  | 0 | -7.573897 | -0.809642 | 2.242815  |
| 34 | 1  | 0 | -7.799163 | 0.264648  | 2.269382  |
| 35 | 1  | 0 | -8.448445 | -1.298321 | 1.793250  |
| 36 | 1  | 0 | -7.479058 | -1.163753 | 3.272730  |
| 37 | 1  | 0 | 1.181474  | 0.005417  | 1.526340  |
| 38 | 26 | 0 | 2.227647  | -0.638783 | 0.412478  |
| 39 | 8  | 0 | 4.008783  | -0.971313 | 1.200740  |
| 40 | 8  | 0 | 3.020605  | 1.046580  | -0.335691 |
| 41 | 6  | 0 | 4.168371  | 1.576295  | -0.157716 |
| 42 | 6  | 0 | 5.065797  | -0.248388 | 1.235008  |
| 43 | 6  | 0 | 5.202629  | 0.988980  | 0.591446  |
| 44 | 6  | 0 | 4.380103  | 2.919870  | -0.815409 |
| 45 | 1  | 0 | 3.641730  | 3.629874  | -0.428835 |
| 46 | 1  | 0 | 5.383645  | 3.315529  | -0.647891 |
| 47 | 1  | 0 | 4.200612  | 2.826624  | -1.891295 |
| 48 | 1  | 0 | 6.143189  | 1.517907  | 0.680051  |
| 49 | 6  | 0 | 6.210036  | -0.819484 | 2.038297  |
| 50 | 1  | 0 | 6.471217  | -1.806457 | 1.642980  |
| 51 | 1  | 0 | 5.884279  | -0.966512 | 3.073322  |
| 52 | 1  | 0 | 7.093315  | -0.178111 | 2.025193  |
| 53 | 8  | 0 | 1.396823  | -0.837780 | -1.362592 |
| 54 | 8  | 0 | 1.917588  | -2.582123 | 0.655891  |
| 55 | 6  | 0 | 1.338160  | -3.435366 | -0.101576 |
| 56 | 6  | 0 | 0.869526  | -1.857264 | -1.937364 |
| 57 | 6  | 0 | 0.831220  | -3.143539 | -1.375671 |
| 58 | 6  | 0 | 1.218748  | -4.830441 | 0.464669  |

|    |   |   |           |           |           |
|----|---|---|-----------|-----------|-----------|
| 59 | 1 | 0 | 0.747197  | -5.526455 | -0.231726 |
| 60 | 1 | 0 | 0.633588  | -4.793397 | 1.389619  |
| 61 | 6 | 0 | 0.238611  | -1.596100 | -3.279132 |
| 62 | 1 | 0 | 0.878875  | -0.927974 | -3.861746 |
| 63 | 1 | 0 | 0.059030  | -2.518574 | -3.835724 |
| 64 | 1 | 0 | 0.362122  | -3.938044 | -1.942115 |
| 65 | 1 | 0 | 2.214493  | -5.199146 | 0.731087  |
| 66 | 1 | 0 | -0.721875 | -1.090508 | -3.115706 |

-----

**TS1**

Standard orientation:

| Center<br>Number | Atomic<br>Number | Atomic<br>Type | Coordinates (Angstroms) |           |           |
|------------------|------------------|----------------|-------------------------|-----------|-----------|
|                  |                  |                | X                       | Y         | Z         |
| 1                | 6                | 0              | 1.120290                | -3.405471 | 0.551387  |
| 2                | 6                | 0              | 1.994010                | -2.856976 | -0.595898 |
| 3                | 6                | 0              | 1.414788                | -1.585310 | -1.251453 |
| 4                | 6                | 0              | 1.548309                | -0.309698 | -0.444195 |
| 5                | 6                | 0              | 2.865584                | 0.257890  | -0.091981 |
| 6                | 6                | 0              | 0.990347                | -2.508637 | 1.757218  |
| 7                | 6                | 0              | 4.046011                | -0.110271 | -0.616964 |
| 8                | 1                | 0              | 1.561176                | -4.367355 | 0.861674  |
| 9                | 1                | 0              | 0.123647                | -3.633668 | 0.155248  |
| 10               | 1                | 0              | 2.089730                | -3.628746 | -1.370286 |
| 11               | 1                | 0              | 3.008827                | -2.673368 | -0.227752 |
| 12               | 1                | 0              | 0.350351                | -1.716231 | -1.458288 |
| 13               | 1                | 0              | 1.916690                | -1.421061 | -2.215385 |
| 14               | 8                | 0              | 0.550000                | 0.345574  | -0.109023 |
| 15               | 1                | 0              | 2.797823                | 1.088081  | 0.605495  |
| 16               | 6                | 0              | 2.245142                | -2.185069 | 2.526158  |
| 17               | 6                | 0              | -0.250384               | -2.022386 | 2.157715  |
| 18               | 6                | 0              | 5.405421                | 0.501066  | -0.347655 |
| 19               | 6                | 0              | 5.957313                | 1.041988  | -1.688691 |
| 20               | 6                | 0              | 6.339765                | -0.621595 | 0.164161  |
| 21               | 6                | 0              | 5.354702                | 1.637912  | 0.685281  |
| 22               | 1                | 0              | 4.065847                | -0.925920 | -1.340197 |
| 23               | 1                | 0              | 2.960415                | -1.572168 | 1.961514  |
| 24               | 1                | 0              | 2.016508                | -1.651216 | 3.453209  |
| 25               | 1                | 0              | 2.783196                | -3.106384 | 2.797010  |
| 26               | 1                | 0              | -0.350108               | -1.553141 | 3.133496  |
| 27               | 1                | 0              | -0.725560               | -0.713358 | 1.405499  |
| 28               | 1                | 0              | -1.145875               | -2.516711 | 1.787666  |
| 29               | 1                | 0              | 6.967443                | 1.442982  | -1.551164 |
| 30               | 1                | 0              | 6.011051                | 0.251430  | -2.445152 |
| 31               | 1                | 0              | 7.353274                | -0.234235 | 0.315351  |
| 32               | 1                | 0              | 6.359261                | 2.040533  | 0.850243  |
| 33               | 1                | 0              | 4.717661                | 2.461215  | 0.346793  |
| 34               | 1                | 0              | 4.973228                | 1.286752  | 1.649374  |
| 35               | 1                | 0              | 5.322746                | 1.842524  | -2.081657 |
| 36               | 1                | 0              | 5.984287                | -1.026542 | 1.116930  |
| 37               | 1                | 0              | 6.400533                | -1.447662 | -0.552784 |
| 38               | 26               | 0              | -1.712829               | 0.286342  | 0.291331  |
| 39               | 8                | 0              | -3.601098               | -0.057530 | 0.833316  |

|    |   |   |           |           |           |
|----|---|---|-----------|-----------|-----------|
| 40 | 8 | 0 | -1.728848 | 1.573586  | -1.300681 |
| 41 | 8 | 0 | -1.918447 | -1.303913 | -0.968679 |
| 42 | 8 | 0 | -1.607254 | 1.883189  | 1.478063  |
| 43 | 6 | 0 | -1.243414 | 3.069852  | 1.169398  |
| 44 | 6 | 0 | -1.403791 | 2.803007  | -1.295311 |
| 45 | 6 | 0 | -1.113448 | 3.557492  | -0.139903 |
| 46 | 6 | 0 | -0.977567 | 3.989157  | 2.341383  |
| 47 | 6 | 0 | -2.986972 | -1.901505 | -1.330316 |
| 48 | 6 | 0 | -4.491515 | -0.798567 | 0.295424  |
| 49 | 6 | 0 | -4.255535 | -1.689169 | -0.764662 |
| 50 | 6 | 0 | -2.826276 | -2.919242 | -2.439061 |
| 51 | 1 | 0 | -2.111811 | -3.687689 | -2.125164 |
| 52 | 1 | 0 | -3.768413 | -3.398193 | -2.712613 |
| 53 | 1 | 0 | -2.402661 | -2.426933 | -3.320468 |
| 54 | 1 | 0 | -5.090070 | -2.263165 | -1.147692 |
| 55 | 6 | 0 | -5.878728 | -0.680197 | 0.885320  |
| 56 | 1 | 0 | -6.214983 | 0.358865  | 0.808974  |
| 57 | 1 | 0 | -5.838336 | -0.924567 | 1.951830  |
| 58 | 1 | 0 | -6.603632 | -1.331667 | 0.393265  |
| 59 | 1 | 0 | -0.692331 | 4.996857  | 2.032197  |
| 60 | 1 | 0 | -0.180864 | 3.562711  | 2.959962  |
| 61 | 6 | 0 | -1.344947 | 3.472668  | -2.653176 |
| 62 | 1 | 0 | -2.315780 | 3.368639  | -3.148412 |
| 63 | 1 | 0 | -1.084248 | 4.531431  | -2.593065 |
| 64 | 1 | 0 | -0.831278 | 4.595320  | -0.268550 |
| 65 | 1 | 0 | -1.873623 | 4.043430  | 2.968187  |
| 66 | 1 | 0 | -0.610036 | 2.955439  | -3.278941 |

-----  
**TS1'**

Standard orientation:

| Center<br>Number | Atomic<br>Number | Atomic<br>Type | Coordinates (Angstroms) |           |           |
|------------------|------------------|----------------|-------------------------|-----------|-----------|
|                  |                  |                | X                       | Y         | Z         |
| 1                | 6                | 0              | -1.143457               | -3.366982 | -2.036069 |
| 2                | 6                | 0              | -1.819626               | -2.030755 | -1.669150 |
| 3                | 6                | 0              | -1.598408               | -1.651561 | -0.182714 |
| 4                | 6                | 0              | -1.752969               | -0.158967 | 0.007802  |
| 5                | 6                | 0              | -3.074029               | 0.463844  | 0.226988  |
| 6                | 6                | 0              | 0.362619                | -3.347160 | -1.841877 |
| 7                | 6                | 0              | -4.231181               | -0.203489 | 0.364985  |
| 8                | 1                | 0              | -1.396281               | -3.598332 | -3.082226 |
| 9                | 1                | 0              | -1.584161               | -4.174132 | -1.435974 |
| 10               | 1                | 0              | -2.892393               | -2.073152 | -1.893589 |
| 11               | 1                | 0              | -1.400044               | -1.239641 | -2.298919 |
| 12               | 1                | 0              | -0.576662               | -1.896735 | 0.109198  |
| 13               | 1                | 0              | -2.284675               | -2.213784 | 0.459063  |
| 14               | 8                | 0              | -0.773793               | 0.591201  | -0.077398 |
| 15               | 1                | 0              | -3.036897               | 1.548305  | 0.278567  |
| 16               | 6                | 0              | 1.116063                | -2.308816 | -2.328153 |
| 17               | 6                | 0              | -5.608699               | 0.379523  | 0.597004  |
| 18               | 6                | 0              | -6.154126               | -0.205545 | 1.922439  |
| 19               | 6                | 0              | -6.518805               | -0.077667 | -0.568934 |
| 20               | 6                | 0              | -5.602027               | 1.914522  | 0.674788  |



|    |    |   |           |           |           |
|----|----|---|-----------|-----------|-----------|
| 21 | 1  | 0 | -4.216127 | -1.292461 | 0.309539  |
| 22 | 1  | 0 | 0.727498  | -1.656752 | -3.105541 |
| 23 | 1  | 0 | 2.199943  | -2.354285 | -2.273786 |
| 24 | 1  | 0 | -7.176485 | 0.145776  | 2.099508  |
| 25 | 1  | 0 | -6.175706 | -1.300547 | 1.896530  |
| 26 | 1  | 0 | -7.544504 | 0.271877  | -0.408691 |
| 27 | 1  | 0 | -6.617736 | 2.285984  | 0.844633  |
| 28 | 1  | 0 | -4.974532 | 2.272234  | 1.497413  |
| 29 | 1  | 0 | -5.234333 | 2.362484  | -0.253965 |
| 30 | 1  | 0 | -5.536321 | 0.100500  | 2.772644  |
| 31 | 1  | 0 | -6.167070 | 0.323793  | -1.524607 |
| 32 | 1  | 0 | -6.545910 | -1.169831 | -0.650059 |
| 33 | 6  | 0 | 0.962684  | -4.410425 | -0.962646 |
| 34 | 1  | 0 | 0.562780  | -4.370988 | 0.062774  |
| 35 | 1  | 0 | 0.736011  | -5.418938 | -1.338039 |
| 36 | 1  | 0 | 2.050596  | -4.314579 | -0.897269 |
| 37 | 1  | 0 | 1.044337  | -0.934970 | -1.282783 |
| 38 | 26 | 0 | 1.559980  | 0.320083  | -0.158683 |
| 39 | 8  | 0 | 3.515195  | -0.019149 | 0.028874  |
| 40 | 8  | 0 | 1.285884  | -0.882426 | 1.452767  |
| 41 | 6  | 0 | 2.164787  | -1.403297 | 2.216521  |
| 42 | 6  | 0 | 4.152371  | -0.641129 | 0.945451  |
| 43 | 6  | 0 | 3.555078  | -1.316239 | 2.022493  |
| 44 | 6  | 0 | 1.625315  | -2.173594 | 3.402916  |
| 45 | 1  | 0 | 0.988498  | -2.989507 | 3.044437  |
| 46 | 1  | 0 | 2.414984  | -2.586980 | 4.033637  |
| 47 | 1  | 0 | 0.992226  | -1.511952 | 4.003097  |
| 48 | 1  | 0 | 4.202366  | -1.804773 | 2.740404  |
| 49 | 6  | 0 | 5.659256  | -0.622338 | 0.813932  |
| 50 | 1  | 0 | 6.008058  | 0.415587  | 0.826008  |
| 51 | 1  | 0 | 5.941976  | -1.042392 | -0.156874 |
| 52 | 1  | 0 | 6.159411  | -1.179707 | 1.608600  |
| 53 | 8  | 0 | 1.284637  | 2.021176  | 0.945409  |
| 54 | 8  | 0 | 1.771436  | 1.523995  | -1.753727 |
| 55 | 6  | 0 | 1.592921  | 2.786413  | -1.852956 |
| 56 | 6  | 0 | 1.174172  | 3.223867  | 0.551427  |
| 57 | 6  | 0 | 1.283989  | 3.646241  | -0.788653 |
| 58 | 6  | 0 | 1.755972  | 3.352356  | -3.247969 |
| 59 | 1  | 0 | 1.602568  | 4.433001  | -3.286954 |
| 60 | 1  | 0 | 1.045113  | 2.862953  | -3.922165 |
| 61 | 6  | 0 | 0.922699  | 4.252277  | 1.635981  |
| 62 | 1  | 0 | 1.742630  | 4.219722  | 2.361183  |
| 63 | 1  | 0 | 0.831163  | 5.267697  | 1.244141  |
| 64 | 1  | 0 | 1.168573  | 4.701880  | -1.002790 |
| 65 | 1  | 0 | 2.759713  | 3.116518  | -3.616839 |
| 66 | 1  | 0 | 0.007436  | 3.989126  | 2.176432  |

-----  
**IM1**

Standard orientation:

| Center<br>Number | Atomic<br>Number | Atomic<br>Type | Coordinates (Angstroms) |           |          |
|------------------|------------------|----------------|-------------------------|-----------|----------|
|                  |                  |                | X                       | Y         | Z        |
| 1                | 6                | 0              | 0.088396                | -2.484536 | 1.740372 |

|    |    |   |           |           |           |
|----|----|---|-----------|-----------|-----------|
| 2  | 6  | 0 | 1.526878  | -2.524884 | 1.191568  |
| 3  | 6  | 0 | 1.738356  | -1.944361 | -0.233447 |
| 4  | 6  | 0 | 1.875707  | -0.441101 | -0.227491 |
| 5  | 6  | 0 | 3.186248  | 0.229827  | -0.317006 |
| 6  | 6  | 0 | -0.560873 | -1.131126 | 2.070962  |
| 7  | 6  | 0 | 4.379434  | -0.384643 | -0.377736 |
| 8  | 1  | 0 | 0.106763  | -3.080732 | 2.673183  |
| 9  | 1  | 0 | -0.557144 | -3.040905 | 1.048977  |
| 10 | 1  | 0 | 1.833115  | -3.577308 | 1.150980  |
| 11 | 1  | 0 | 2.218656  | -2.041369 | 1.892358  |
| 12 | 1  | 0 | 0.870778  | -2.184737 | -0.853944 |
| 13 | 1  | 0 | 2.621839  | -2.401790 | -0.686006 |
| 14 | 8  | 0 | 0.880720  | 0.286748  | -0.109002 |
| 15 | 1  | 0 | 3.112216  | 1.313600  | -0.304428 |
| 16 | 6  | 0 | 0.321671  | -0.269020 | 2.971938  |
| 17 | 6  | 0 | -1.900098 | -1.393531 | 2.776391  |
| 18 | 6  | 0 | 5.744971  | 0.264473  | -0.437997 |
| 19 | 6  | 0 | 6.451747  | -0.239625 | -1.719925 |
| 20 | 6  | 0 | 6.547195  | -0.207597 | 0.799464  |
| 21 | 6  | 0 | 5.678483  | 1.799967  | -0.455139 |
| 22 | 1  | 0 | 4.410707  | -1.474114 | -0.378397 |
| 23 | 1  | 0 | 1.266282  | 0.023990  | 2.502984  |
| 24 | 1  | 0 | -0.194199 | 0.651859  | 3.256054  |
| 25 | 1  | 0 | 0.576461  | -0.810259 | 3.901289  |
| 26 | 1  | 0 | -1.726624 | -1.891025 | 3.748188  |
| 27 | 1  | 0 | -2.446817 | -0.467497 | 2.982379  |
| 28 | 1  | 0 | -2.558646 | -2.048958 | 2.195760  |
| 29 | 1  | 0 | 7.470055  | 0.160571  | -1.772397 |
| 30 | 1  | 0 | 6.520286  | -1.332886 | -1.735161 |
| 31 | 1  | 0 | 7.566111  | 0.193202  | 0.764597  |
| 32 | 1  | 0 | 6.688946  | 2.218035  | -0.505297 |
| 33 | 1  | 0 | 5.122029  | 2.168207  | -1.323050 |
| 34 | 1  | 0 | 5.200164  | 2.192243  | 0.447965  |
| 35 | 1  | 0 | 5.914178  | 0.078412  | -2.618877 |
| 36 | 1  | 0 | 6.077926  | 0.133521  | 1.727584  |
| 37 | 1  | 0 | 6.618061  | -1.300085 | 0.837484  |
| 38 | 26 | 0 | -1.291406 | -0.025646 | 0.310765  |
| 39 | 8  | 0 | -3.307915 | -0.171629 | 0.297247  |
| 40 | 8  | 0 | -1.271067 | 1.204079  | -1.410825 |
| 41 | 8  | 0 | -1.329028 | -1.600743 | -0.987975 |
| 42 | 8  | 0 | -1.448997 | 1.687067  | 1.333885  |
| 43 | 6  | 0 | -1.600136 | 2.898132  | 0.945700  |
| 44 | 6  | 0 | -1.437944 | 2.456507  | -1.489676 |
| 45 | 6  | 0 | -1.597645 | 3.325429  | -0.386134 |
| 46 | 6  | 0 | -1.794427 | 3.907557  | 2.057105  |
| 47 | 6  | 0 | -2.304767 | -2.051282 | -1.679397 |
| 48 | 6  | 0 | -4.078053 | -0.783763 | -0.512713 |
| 49 | 6  | 0 | -3.647692 | -1.688678 | -1.499669 |
| 50 | 6  | 0 | -1.938597 | -3.059821 | -2.747163 |
| 51 | 1  | 0 | -1.426032 | -3.910285 | -2.284905 |
| 52 | 1  | 0 | -2.807313 | -3.423789 | -3.299603 |
| 53 | 1  | 0 | -1.233927 | -2.600166 | -3.448248 |
| 54 | 1  | 0 | -4.393547 | -2.146438 | -2.137663 |
| 55 | 6  | 0 | -5.554719 | -0.491539 | -0.356542 |

|    |   |   |           |           |           |
|----|---|---|-----------|-----------|-----------|
| 56 | 1 | 0 | -5.726987 | 0.579611  | -0.504948 |
| 57 | 1 | 0 | -5.862377 | -0.725761 | 0.667788  |
| 58 | 1 | 0 | -6.173202 | -1.056108 | -1.057424 |
| 59 | 1 | 0 | -1.909585 | 4.927903  | 1.685112  |
| 60 | 1 | 0 | -0.937593 | 3.866465  | 2.737918  |
| 61 | 6 | 0 | -1.464180 | 3.036578  | -2.891890 |
| 62 | 1 | 0 | -2.254359 | 2.546675  | -3.470188 |
| 63 | 1 | 0 | -1.627523 | 4.116541  | -2.902627 |
| 64 | 1 | 0 | -1.735817 | 4.381743  | -0.582934 |
| 65 | 1 | 0 | -2.679863 | 3.634640  | 2.641084  |
| 66 | 1 | 0 | -0.515905 | 2.811833  | -3.391553 |

-----

**TS2**

Standard orientation:

| Center<br>Number | Atomic<br>Number | Atomic<br>Type | Coordinates (Angstroms) |           |           |
|------------------|------------------|----------------|-------------------------|-----------|-----------|
|                  |                  |                | X                       | Y         | Z         |
| 1                | 8                | 0              | -2.461387               | -1.125129 | 0.878851  |
| 2                | 6                | 0              | -3.657322               | -1.550145 | 0.792930  |
| 3                | 6                | 0              | -4.631224               | -1.030384 | -0.083939 |
| 4                | 6                | 0              | -4.393262               | 0.025597  | -0.977567 |
| 5                | 8                | 0              | -3.273841               | 0.628079  | -1.123518 |
| 6                | 6                | 0              | -5.516767               | 0.523039  | -1.863067 |
| 7                | 6                | 0              | -4.023720               | -2.692926 | 1.719721  |
| 8                | 1                | 0              | -5.623708               | -1.464578 | -0.060516 |
| 9                | 1                | 0              | -6.447076               | -0.030481 | -1.717588 |
| 10               | 1                | 0              | -5.211161               | 0.446235  | -2.911928 |
| 11               | 1                | 0              | -5.695212               | 1.584601  | -1.660745 |
| 12               | 1                | 0              | -3.361544               | -3.543869 | 1.526947  |
| 13               | 1                | 0              | -5.061028               | -3.015307 | 1.605416  |
| 14               | 1                | 0              | -3.855211               | -2.385506 | 2.757315  |
| 15               | 6                | 0              | 1.548731                | -3.588195 | -0.153353 |
| 16               | 6                | 0              | 2.064706                | -3.354793 | -1.583870 |
| 17               | 6                | 0              | 1.258140                | -2.222665 | -2.259459 |
| 18               | 6                | 0              | 0.861795                | -1.170803 | -1.243859 |
| 19               | 6                | 0              | 1.885721                | -0.602207 | -0.353626 |
| 20               | 6                | 0              | 1.861954                | -2.450749 | 0.815754  |
| 21               | 6                | 0              | 3.146078                | -0.252105 | -0.856924 |
| 22               | 1                | 0              | 1.990889                | -4.513449 | 0.246923  |
| 23               | 1                | 0              | 0.465097                | -3.754323 | -0.191376 |
| 24               | 1                | 0              | 1.976275                | -4.270794 | -2.177333 |
| 25               | 1                | 0              | 3.129862                | -3.102209 | -1.554710 |
| 26               | 1                | 0              | 0.331034                | -2.603679 | -2.695284 |
| 27               | 1                | 0              | 1.836058                | -1.759508 | -3.068511 |
| 28               | 8                | 0              | -0.338819               | -0.882313 | -1.116210 |
| 29               | 1                | 0              | 1.465538                | 0.015248  | 0.435322  |
| 30               | 6                | 0              | 3.268622                | -2.484539 | 1.362858  |
| 31               | 6                | 0              | 0.790096                | -2.170784 | 1.839340  |
| 32               | 6                | 0              | 4.093337                | 0.804824  | -0.323508 |
| 33               | 6                | 0              | 4.188895                | 1.920526  | -1.398289 |
| 34               | 6                | 0              | 5.502231                | 0.190572  | -0.136816 |
| 35               | 6                | 0              | 3.624970                | 1.432725  | 1.000955  |
| 36               | 1                | 0              | 3.485186                | -0.727600 | -1.776768 |

|    |    |   |           |           |           |
|----|----|---|-----------|-----------|-----------|
| 37 | 1  | 0 | 4.022903  | -2.565389 | 0.574588  |
| 38 | 1  | 0 | 3.494508  | -1.599070 | 1.962794  |
| 39 | 1  | 0 | 3.382844  | -3.361348 | 2.018685  |
| 40 | 1  | 0 | 0.669931  | -3.049681 | 2.493635  |
| 41 | 1  | 0 | 1.046145  | -1.322342 | 2.480648  |
| 42 | 1  | 0 | -0.185302 | -1.971766 | 1.387143  |
| 43 | 1  | 0 | 4.900346  | 2.693712  | -1.085324 |
| 44 | 1  | 0 | 4.530983  | 1.518662  | -2.358445 |
| 45 | 1  | 0 | 6.223685  | 0.965728  | 0.145970  |
| 46 | 1  | 0 | 4.353202  | 2.179250  | 1.335740  |
| 47 | 1  | 0 | 2.659952  | 1.938060  | 0.893297  |
| 48 | 1  | 0 | 3.532217  | 0.685004  | 1.795465  |
| 49 | 1  | 0 | 3.215517  | 2.394632  | -1.557532 |
| 50 | 1  | 0 | 5.504329  | -0.573551 | 0.645928  |
| 51 | 1  | 0 | 5.858214  | -0.273501 | -1.063649 |
| 52 | 26 | 0 | -1.574227 | 0.425542  | -0.098661 |
| 53 | 8  | 0 | -0.743844 | 2.050693  | -1.003935 |
| 54 | 6  | 0 | -0.263879 | 3.101214  | -0.477901 |
| 55 | 6  | 0 | -0.019308 | 3.263926  | 0.905418  |
| 56 | 6  | 0 | -0.287746 | 2.274601  | 1.863377  |
| 57 | 8  | 0 | -0.740889 | 1.104095  | 1.603629  |
| 58 | 6  | 0 | 0.054065  | 4.239272  | -1.428175 |
| 59 | 6  | 0 | -0.031288 | 2.562512  | 3.328320  |
| 60 | 1  | 0 | 0.366988  | 4.216351  | 1.248761  |
| 61 | 1  | 0 | 0.779861  | 3.898484  | -2.174559 |
| 62 | 1  | 0 | 0.452300  | 5.119664  | -0.918694 |
| 63 | 1  | 0 | -0.854292 | 4.517455  | -1.972628 |
| 64 | 1  | 0 | 0.375908  | 3.561667  | 3.498257  |
| 65 | 1  | 0 | 0.663569  | 1.817596  | 3.730782  |
| 66 | 1  | 0 | -0.967621 | 2.457026  | 3.886688  |

-----  
**IM2**

Standard orientation:

| Center<br>Number | Atomic<br>Number | Atomic<br>Type | Coordinates (Angstroms) |           |           |
|------------------|------------------|----------------|-------------------------|-----------|-----------|
|                  |                  |                | X                       | Y         | Z         |
| 1                | 8                | 0              | -1.560464               | -1.720831 | 0.660305  |
| 2                | 6                | 0              | -2.524066               | -2.547487 | 0.593528  |
| 3                | 6                | 0              | -3.691923               | -2.359648 | -0.176557 |
| 4                | 6                | 0              | -3.936673               | -1.231845 | -0.973594 |
| 5                | 8                | 0              | -3.145360               | -0.232448 | -1.106214 |
| 6                | 6                | 0              | -5.223863               | -1.142370 | -1.765410 |
| 7                | 6                | 0              | -2.371001               | -3.816400 | 1.409438  |
| 8                | 1                | 0              | -4.446655               | -3.136710 | -0.153490 |
| 9                | 1                | 0              | -5.861623               | -2.019263 | -1.635459 |
| 10               | 1                | 0              | -4.986627               | -1.022147 | -2.827796 |
| 11               | 1                | 0              | -5.776219               | -0.247302 | -1.459832 |
| 12               | 1                | 0              | -1.465489               | -4.345563 | 1.093427  |
| 13               | 1                | 0              | -3.227094               | -4.487835 | 1.314435  |
| 14               | 1                | 0              | -2.236114               | -3.553147 | 2.463851  |
| 15               | 6                | 0              | 2.866195                | -3.123382 | -0.062273 |
| 16               | 6                | 0              | 3.060487                | -2.778813 | -1.543694 |
| 17               | 6                | 0              | 1.845295                | -1.982318 | -2.045940 |

|    |    |   |           |           |           |
|----|----|---|-----------|-----------|-----------|
| 18 | 6  | 0 | 1.326392  | -0.992949 | -1.019549 |
| 19 | 6  | 0 | 2.230492  | -0.614813 | 0.142518  |
| 20 | 6  | 0 | 2.840834  | -1.880565 | 0.876206  |
| 21 | 6  | 0 | 3.195634  | 0.333434  | -0.513667 |
| 22 | 1  | 0 | 3.647202  | -3.812006 | 0.280498  |
| 23 | 1  | 0 | 1.916040  | -3.666103 | 0.035368  |
| 24 | 1  | 0 | 3.170585  | -3.691484 | -2.139109 |
| 25 | 1  | 0 | 3.987047  | -2.210647 | -1.685266 |
| 26 | 1  | 0 | 1.007841  | -2.655639 | -2.265612 |
| 27 | 1  | 0 | 2.053426  | -1.448294 | -2.981637 |
| 28 | 8  | 0 | 0.203285  | -0.490329 | -1.169214 |
| 29 | 1  | 0 | 1.614169  | -0.066773 | 0.859065  |
| 30 | 6  | 0 | 4.262412  | -1.575185 | 1.383074  |
| 31 | 6  | 0 | 1.933110  | -2.196755 | 2.082079  |
| 32 | 6  | 0 | 3.098724  | 1.843789  | -0.539503 |
| 33 | 6  | 0 | 2.412380  | 2.303431  | -1.855935 |
| 34 | 6  | 0 | 4.541557  | 2.403324  | -0.513984 |
| 35 | 6  | 0 | 2.315404  | 2.411165  | 0.659352  |
| 36 | 1  | 0 | 3.943747  | -0.095140 | -1.177608 |
| 37 | 1  | 0 | 4.978220  | -1.452093 | 0.564355  |
| 38 | 1  | 0 | 4.283087  | -0.657903 | 1.980918  |
| 39 | 1  | 0 | 4.616787  | -2.396585 | 2.015871  |
| 40 | 1  | 0 | 2.245424  | -3.130878 | 2.563771  |
| 41 | 1  | 0 | 1.983164  | -1.400124 | 2.832735  |
| 42 | 1  | 0 | 0.886462  | -2.300507 | 1.775435  |
| 43 | 1  | 0 | 2.424984  | 3.398184  | -1.925434 |
| 44 | 1  | 0 | 2.937168  | 1.908272  | -2.732951 |
| 45 | 1  | 0 | 4.529102  | 3.497187  | -0.575372 |
| 46 | 1  | 0 | 2.331111  | 3.505790  | 0.630226  |
| 47 | 1  | 0 | 1.268038  | 2.100521  | 0.649126  |
| 48 | 1  | 0 | 2.758903  | 2.096701  | 1.610902  |
| 49 | 1  | 0 | 1.370772  | 1.973392  | -1.895596 |
| 50 | 1  | 0 | 5.060755  | 2.120288  | 0.407761  |
| 51 | 1  | 0 | 5.128109  | 2.027932  | -1.360294 |
| 52 | 26 | 0 | -1.438902 | 0.149947  | -0.166845 |
| 53 | 8  | 0 | -1.319696 | 2.043603  | -0.944160 |
| 54 | 6  | 0 | -1.511153 | 3.136247  | -0.326452 |
| 55 | 6  | 0 | -1.554064 | 3.265860  | 1.080714  |
| 56 | 6  | 0 | -1.361462 | 2.200073  | 1.969893  |
| 57 | 8  | 0 | -1.128083 | 0.984994  | 1.627953  |
| 58 | 6  | 0 | -1.683965 | 4.369480  | -1.190430 |
| 59 | 6  | 0 | -1.402923 | 2.453697  | 3.461835  |
| 60 | 1  | 0 | -1.736463 | 4.249247  | 1.497279  |
| 61 | 1  | 0 | -0.789309 | 4.506245  | -1.807248 |
| 62 | 1  | 0 | -1.858063 | 5.276351  | -0.607047 |
| 63 | 1  | 0 | -2.523174 | 4.213673  | -1.876096 |
| 64 | 1  | 0 | -1.579436 | 3.502949  | 3.707937  |
| 65 | 1  | 0 | -0.456996 | 2.131935  | 3.910373  |
| 66 | 1  | 0 | -2.191820 | 1.841105  | 3.911220  |

-----  
**syn-TS3**

Standard orientation:

-----  
Center    Atomic    Atomic    Coordinates (Angstroms)

| Number | Number | Type | X         | Y         | Z         |
|--------|--------|------|-----------|-----------|-----------|
| 1      | 8      | 0    | -1.269275 | -1.841548 | 0.654344  |
| 2      | 6      | 0    | -2.083913 | -2.810723 | 0.543750  |
| 3      | 6      | 0    | -3.231770 | -2.804295 | -0.278018 |
| 4      | 6      | 0    | -3.617249 | -1.718856 | -1.075744 |
| 5      | 8      | 0    | -2.995480 | -0.599494 | -1.152671 |
| 6      | 6      | 0    | -4.858566 | -1.821908 | -1.934670 |
| 7      | 6      | 0    | -1.762586 | -4.047944 | 1.358455  |
| 8      | 1      | 0    | -3.849889 | -3.693749 | -0.297107 |
| 9      | 1      | 0    | -5.350349 | -2.793377 | -1.851715 |
| 10     | 1      | 0    | -4.589606 | -1.640814 | -2.980667 |
| 11     | 1      | 0    | -5.564387 | -1.035377 | -1.647104 |
| 12     | 1      | 0    | -0.787113 | -4.441765 | 1.052668  |
| 13     | 1      | 0    | -2.512775 | -4.834024 | 1.248892  |
| 14     | 1      | 0    | -1.679961 | -3.772407 | 2.414828  |
| 15     | 6      | 0    | 3.250336  | -2.768360 | -0.032019 |
| 16     | 6      | 0    | 3.292927  | -2.404929 | -1.521114 |
| 17     | 6      | 0    | 1.975954  | -1.725776 | -1.925512 |
| 18     | 6      | 0    | 1.481280  | -0.720968 | -0.902055 |
| 19     | 6      | 0    | 2.356829  | -0.365447 | 0.273675  |
| 20     | 6      | 0    | 3.167031  | -1.542223 | 0.923466  |
| 21     | 6      | 0    | 3.052595  | 0.644155  | -0.577574 |
| 22     | 1      | 0    | 4.122061  | -3.374324 | 0.242544  |
| 23     | 1      | 0    | 2.370561  | -3.405519 | 0.130966  |
| 24     | 1      | 0    | 3.437713  | -3.306268 | -2.126923 |
| 25     | 1      | 0    | 4.151812  | -1.757612 | -1.735109 |
| 26     | 1      | 0    | 1.182331  | -2.482367 | -1.996542 |
| 27     | 1      | 0    | 2.032789  | -1.259082 | -2.916148 |
| 28     | 8      | 0    | 0.322730  | -0.236153 | -1.034817 |
| 29     | 1      | 0    | 1.740624  | 0.123653  | 1.030315  |
| 30     | 6      | 0    | 4.580841  | -1.067896 | 1.306790  |
| 31     | 6      | 0    | 2.411415  | -1.970511 | 2.197782  |
| 32     | 6      | 0    | 2.771925  | 2.131369  | -0.658480 |
| 33     | 6      | 0    | 2.171008  | 2.480346  | -2.045238 |
| 34     | 6      | 0    | 4.134234  | 2.858568  | -0.516314 |
| 35     | 6      | 0    | 1.821444  | 2.628327  | 0.444998  |
| 36     | 1      | 0    | 3.838083  | 0.287791  | -1.238402 |
| 37     | 1      | 0    | 5.195262  | -0.848737 | 0.427828  |
| 38     | 1      | 0    | 4.541940  | -0.159309 | 1.917440  |
| 39     | 1      | 0    | 5.094120  | -1.841588 | 1.888585  |
| 40     | 1      | 0    | 2.866307  | -2.865978 | 2.637434  |
| 41     | 1      | 0    | 2.432525  | -1.178625 | 2.955018  |
| 42     | 1      | 0    | 1.362318  | -2.192855 | 1.972991  |
| 43     | 1      | 0    | 2.064906  | 3.566621  | -2.152327 |
| 44     | 1      | 0    | 2.819489  | 2.127584  | -2.855247 |
| 45     | 1      | 0    | 3.997685  | 3.942304  | -0.607783 |
| 46     | 1      | 0    | 1.685141  | 3.711418  | 0.356777  |
| 47     | 1      | 0    | 0.836189  | 2.164424  | 0.369822  |
| 48     | 1      | 0    | 2.224591  | 2.426456  | 1.443749  |
| 49     | 1      | 0    | 1.184840  | 2.025447  | -2.167322 |
| 50     | 1      | 0    | 4.595055  | 2.654820  | 0.455938  |
| 51     | 1      | 0    | 4.836740  | 2.543570  | -1.296104 |
| 52     | 26     | 0    | -1.401944 | 0.035225  | -0.164474 |

|    |   |   |           |          |           |
|----|---|---|-----------|----------|-----------|
| 53 | 8 | 0 | -1.655212 | 1.937174 | -0.878805 |
| 54 | 6 | 0 | -2.054916 | 2.955758 | -0.234961 |
| 55 | 6 | 0 | -2.145823 | 3.029656 | 1.173799  |
| 56 | 6 | 0 | -1.789689 | 1.984480 | 2.035147  |
| 57 | 8 | 0 | -1.358208 | 0.833586 | 1.664180  |
| 58 | 6 | 0 | -2.434820 | 4.162846 | -1.067816 |
| 59 | 6 | 0 | -1.888275 | 2.180448 | 3.532377  |
| 60 | 1 | 0 | -2.498117 | 3.954396 | 1.614492  |
| 61 | 1 | 0 | -3.236566 | 3.883435 | -1.759265 |
| 62 | 1 | 0 | -1.577560 | 4.464268 | -1.678710 |
| 63 | 1 | 0 | -2.760873 | 5.011139 | -0.462156 |
| 64 | 1 | 0 | -2.246165 | 3.175160 | 3.806042  |
| 65 | 1 | 0 | -0.904584 | 2.013892 | 3.984134  |
| 66 | 1 | 0 | -2.562321 | 1.426328 | 3.952296  |

-----

**syn-IM3**

-----

| Center<br>Number | Atomic<br>Number | Atomic<br>Type | Coordinates (Angstroms) |           |           |
|------------------|------------------|----------------|-------------------------|-----------|-----------|
|                  |                  |                | X                       | Y         | Z         |
| 1                | 8                | 0              | -0.959011               | -1.741831 | 1.074641  |
| 2                | 6                | 0              | -1.171055               | -2.987419 | 0.887996  |
| 3                | 6                | 0              | -1.834226               | -3.519032 | -0.230738 |
| 4                | 6                | 0              | -2.347693               | -2.717671 | -1.261480 |
| 5                | 8                | 0              | -2.271331               | -1.441081 | -1.292502 |
| 6                | 6                | 0              | -3.051456               | -3.351657 | -2.438272 |
| 7                | 6                | 0              | -0.654415               | -3.907858 | 1.969523  |
| 8                | 1                | 0              | -1.962038               | -4.592169 | -0.296159 |
| 9                | 1                | 0              | -3.102720               | -4.439373 | -2.360442 |
| 10               | 1                | 0              | -2.528112               | -3.078473 | -3.360455 |
| 11               | 1                | 0              | -4.064886               | -2.944540 | -2.514391 |
| 12               | 1                | 0              | 0.430613                | -3.789221 | 2.058415  |
| 13               | 1                | 0              | -0.886383               | -4.956653 | 1.774208  |
| 14               | 1                | 0              | -1.087457               | -3.612198 | 2.930464  |
| 15               | 6                | 0              | 3.252466                | -2.218322 | 0.007900  |
| 16               | 6                | 0              | 2.969095                | -1.940557 | -1.473582 |
| 17               | 6                | 0              | 1.620469                | -1.225302 | -1.636525 |
| 18               | 6                | 0              | 1.481295                | 0.009420  | -0.750844 |
| 19               | 6                | 0              | 2.408805                | 0.151891  | 0.450526  |
| 20               | 6                | 0              | 3.411378                | -0.942809 | 0.880131  |
| 21               | 6                | 0              | 2.591978                | 1.040526  | -0.771752 |
| 22               | 1                | 0              | 4.149454                | -2.841301 | 0.117215  |
| 23               | 1                | 0              | 2.415075                | -2.811043 | 0.401569  |
| 24               | 1                | 0              | 2.948133                | -2.884340 | -2.031392 |
| 25               | 1                | 0              | 3.780474                | -1.349441 | -1.917004 |
| 26               | 1                | 0              | 0.822003                | -1.923688 | -1.353645 |
| 27               | 1                | 0              | 1.440840                | -0.947493 | -2.683052 |
| 28               | 8                | 0              | 0.179712                | 0.457384  | -0.628501 |
| 29               | 1                | 0              | 1.928963                | 0.656163  | 1.285931  |
| 30               | 6                | 0              | 4.859692                | -0.419151 | 0.793742  |
| 31               | 6                | 0              | 3.111490                | -1.317866 | 2.345905  |
| 32               | 6                | 0              | 2.393896                | 2.568515  | -0.796717 |
| 33               | 6                | 0              | 1.735663                | 2.943211  | -2.141895 |

|    |    |   |           |           |           |
|----|----|---|-----------|-----------|-----------|
| 34 | 6  | 0 | 3.786705  | 3.229597  | -0.710141 |
| 35 | 6  | 0 | 1.530808  | 3.107057  | 0.360077  |
| 36 | 1  | 0 | 3.417706  | 0.752070  | -1.422829 |
| 37 | 1  | 0 | 5.157837  | -0.204032 | -0.237098 |
| 38 | 1  | 0 | 4.975836  | 0.505649  | 1.369291  |
| 39 | 1  | 0 | 5.563238  | -1.157331 | 1.196685  |
| 40 | 1  | 0 | 3.743796  | -2.150312 | 2.677118  |
| 41 | 1  | 0 | 3.296887  | -0.470702 | 3.016377  |
| 42 | 1  | 0 | 2.063374  | -1.614657 | 2.464014  |
| 43 | 1  | 0 | 1.638851  | 4.031020  | -2.242842 |
| 44 | 1  | 0 | 2.335563  | 2.583498  | -2.986349 |
| 45 | 1  | 0 | 3.701741  | 4.322217  | -0.738041 |
| 46 | 1  | 0 | 1.408815  | 4.191437  | 0.255003  |
| 47 | 1  | 0 | 0.540492  | 2.648400  | 0.368122  |
| 48 | 1  | 0 | 2.003912  | 2.924953  | 1.331242  |
| 49 | 1  | 0 | 0.740598  | 2.496254  | -2.218463 |
| 50 | 1  | 0 | 4.296986  | 2.955264  | 0.219886  |
| 51 | 1  | 0 | 4.426526  | 2.924049  | -1.546230 |
| 52 | 26 | 0 | -1.424625 | -0.142618 | -0.045854 |
| 53 | 8  | 0 | -2.660391 | 1.199658  | -0.871389 |
| 54 | 6  | 0 | -3.160302 | 2.266053  | -0.381604 |
| 55 | 6  | 0 | -3.071917 | 2.635133  | 0.972647  |
| 56 | 6  | 0 | -2.430871 | 1.844652  | 1.935771  |
| 57 | 8  | 0 | -1.842623 | 0.733254  | 1.690230  |
| 58 | 6  | 0 | -3.894414 | 3.152036  | -1.361219 |
| 59 | 6  | 0 | -2.406509 | 2.279872  | 3.382328  |
| 60 | 1  | 0 | -3.539319 | 3.559093  | 1.289064  |
| 61 | 1  | 0 | -3.200406 | 3.470577  | -2.146039 |
| 62 | 1  | 0 | -4.329759 | 4.033237  | -0.886024 |
| 63 | 1  | 0 | -4.685110 | 2.573188  | -1.849140 |
| 64 | 1  | 0 | -2.941775 | 3.216888  | 3.547311  |
| 65 | 1  | 0 | -1.366786 | 2.395678  | 3.705812  |
| 66 | 1  | 0 | -2.848846 | 1.494411  | 4.003593  |

-----  
**anti-TS3**

Standard orientation:

| Center<br>Number | Atomic<br>Number | Atomic<br>Type | Coordinates (Angstroms) |           |           |
|------------------|------------------|----------------|-------------------------|-----------|-----------|
|                  |                  |                | X                       | Y         | Z         |
| 1                | 8                | 0              | -2.054713               | -1.532402 | 0.635445  |
| 2                | 6                | 0              | -3.149375               | -2.169450 | 0.551316  |
| 3                | 6                | 0              | -4.259913               | -1.760333 | -0.220226 |
| 4                | 6                | 0              | -4.285396               | -0.593924 | -0.994259 |
| 5                | 8                | 0              | -3.323755               | 0.249490  | -1.094818 |
| 6                | 6                | 0              | -5.520498               | -0.254496 | -1.799647 |
| 7                | 6                | 0              | -3.230679               | -3.461421 | 1.340311  |
| 8                | 1                | 0              | -5.142171               | -2.388945 | -0.218273 |
| 9                | 1                | 0              | -6.309387               | -1.002825 | -1.698397 |
| 10               | 1                | 0              | -5.246795               | -0.158196 | -2.855623 |
| 11               | 1                | 0              | -5.904974               | 0.720141  | -1.480592 |
| 12               | 1                | 0              | -2.461818               | -4.154213 | 0.981254  |
| 13               | 1                | 0              | -4.207126               | -3.944646 | 1.263819  |
| 14               | 1                | 0              | -3.010644               | -3.255591 | 2.392846  |



|    |    |   |           |           |           |
|----|----|---|-----------|-----------|-----------|
| 15 | 6  | 0 | 2.562106  | -3.178344 | -0.283092 |
| 16 | 6  | 0 | 2.864376  | -2.617469 | -1.675138 |
| 17 | 6  | 0 | 1.721598  | -1.699424 | -2.144932 |
| 18 | 6  | 0 | 1.065468  | -0.917640 | -1.020276 |
| 19 | 6  | 0 | 1.742041  | -0.814048 | 0.329051  |
| 20 | 6  | 0 | 2.488208  | -2.100887 | 0.834769  |
| 21 | 6  | 0 | 2.276326  | 0.524819  | -0.126507 |
| 22 | 1  | 0 | 3.309671  | -3.929960 | -0.002058 |
| 23 | 1  | 0 | 1.599032  | -3.705301 | -0.327490 |
| 24 | 1  | 0 | 2.984280  | -3.436189 | -2.393535 |
| 25 | 1  | 0 | 3.816636  | -2.083899 | -1.663910 |
| 26 | 1  | 0 | 0.910371  | -2.305480 | -2.566977 |
| 27 | 1  | 0 | 2.037234  | -1.028003 | -2.952146 |
| 28 | 8  | 0 | -0.110961 | -0.485041 | -1.206240 |
| 29 | 1  | 0 | 0.960617  | -0.579245 | 1.056880  |
| 30 | 6  | 0 | 3.884544  | -1.808484 | 1.408777  |
| 31 | 6  | 0 | 1.620378  | -2.675607 | 1.978692  |
| 32 | 1  | 0 | 4.607494  | -1.526288 | 0.640894  |
| 33 | 1  | 0 | 3.845707  | -1.002353 | 2.148247  |
| 34 | 1  | 0 | 4.273830  | -2.700554 | 1.912508  |
| 35 | 1  | 0 | 2.005555  | -3.649571 | 2.302641  |
| 36 | 1  | 0 | 1.619941  | -2.007647 | 2.847285  |
| 37 | 1  | 0 | 0.581198  | -2.805316 | 1.658526  |
| 38 | 26 | 0 | -1.573459 | 0.294684  | -0.174583 |
| 39 | 8  | 0 | -1.282612 | 2.218904  | -0.787539 |
| 40 | 6  | 0 | -1.005501 | 3.250891  | -0.105440 |
| 41 | 6  | 0 | -0.707299 | 3.238386  | 1.278159  |
| 42 | 6  | 0 | -0.712033 | 2.079499  | 2.062327  |
| 43 | 8  | 0 | -0.963429 | 0.894913  | 1.631129  |
| 44 | 6  | 0 | -0.998040 | 4.566723  | -0.856923 |
| 45 | 6  | 0 | -0.401523 | 2.170838  | 3.540456  |
| 46 | 1  | 0 | -0.486244 | 4.181757  | 1.762841  |
| 47 | 1  | 0 | -0.271536 | 4.512519  | -1.674497 |
| 48 | 1  | 0 | -0.756839 | 5.418781  | -0.217640 |
| 49 | 1  | 0 | -1.980420 | 4.724819  | -1.313741 |
| 50 | 1  | 0 | -0.167239 | 3.188240  | 3.860679  |
| 51 | 1  | 0 | 0.442777  | 1.514263  | 3.776144  |
| 52 | 1  | 0 | -1.259209 | 1.802271  | 4.113305  |
| 53 | 6  | 0 | 3.550892  | 1.207689  | -0.616127 |
| 54 | 6  | 0 | 4.299075  | 1.762322  | 0.629962  |
| 55 | 1  | 0 | 3.632314  | 2.374052  | 1.246383  |
| 56 | 1  | 0 | 4.694136  | 0.956753  | 1.253714  |
| 57 | 1  | 0 | 5.139778  | 2.392930  | 0.315429  |
| 58 | 6  | 0 | 3.096966  | 2.419330  | -1.471139 |
| 59 | 1  | 0 | 2.436266  | 3.080008  | -0.900198 |
| 60 | 1  | 0 | 3.962789  | 3.006982  | -1.795956 |
| 61 | 1  | 0 | 2.552783  | 2.089360  | -2.361800 |
| 62 | 1  | 0 | 1.506500  | 1.271141  | 0.056814  |
| 63 | 6  | 0 | 4.541294  | 0.394980  | -1.468665 |
| 64 | 1  | 0 | 4.970217  | -0.451595 | -0.930973 |
| 65 | 1  | 0 | 4.076339  | 0.026814  | -2.386973 |
| 66 | 1  | 0 | 5.374543  | 1.042599  | -1.762778 |

-----  
**anti-IM3**

## Standard orientation:

| Center<br>Number | Atomic<br>Number | Atomic<br>Type | Coordinates (Angstroms) |           |           |
|------------------|------------------|----------------|-------------------------|-----------|-----------|
|                  |                  |                | X                       | Y         | Z         |
| 1                | 8                | 0              | 1.461846                | 1.552075  | 0.905565  |
| 2                | 6                | 0              | 1.923767                | 2.721888  | 0.668914  |
| 3                | 6                | 0              | 2.660000                | 3.069342  | -0.473107 |
| 4                | 6                | 0              | 2.976120                | 2.147089  | -1.484756 |
| 5                | 8                | 0              | 2.644627                | 0.914706  | -1.467465 |
| 6                | 6                | 0              | 3.763377                | 2.591071  | -2.695900 |
| 7                | 6                | 0              | 1.627493                | 3.763559  | 1.722989  |
| 8                | 1                | 0              | 3.000951                | 4.091495  | -0.578703 |
| 9                | 1                | 0              | 4.036737                | 3.647258  | -2.655394 |
| 10               | 1                | 0              | 3.170511                | 2.404704  | -3.597417 |
| 11               | 1                | 0              | 4.670171                | 1.983462  | -2.779183 |
| 12               | 1                | 0              | 0.543339                | 3.877546  | 1.827032  |
| 13               | 1                | 0              | 2.069583                | 4.733940  | 1.488799  |
| 14               | 1                | 0              | 2.005858                | 3.415381  | 2.689446  |
| 15               | 6                | 0              | -2.550704               | 2.435735  | 0.565418  |
| 16               | 6                | 0              | -2.741568               | 2.233291  | -0.938458 |
| 17               | 6                | 0              | -1.671189               | 1.284929  | -1.504175 |
| 18               | 6                | 0              | -1.390717               | 0.032819  | -0.667646 |
| 19               | 6                | 0              | -2.010725               | -0.053315 | 0.726048  |
| 20               | 6                | 0              | -2.724571               | 1.142893  | 1.404890  |
| 21               | 6                | 0              | -2.407489               | -1.049384 | -0.390031 |
| 22               | 1                | 0              | -3.239326               | 3.204466  | 0.939495  |
| 23               | 1                | 0              | -1.534384               | 2.818746  | 0.730649  |
| 24               | 1                | 0              | -2.663241               | 3.197498  | -1.455725 |
| 25               | 1                | 0              | -3.749583               | 1.866302  | -1.141623 |
| 26               | 1                | 0              | -0.721120               | 1.832019  | -1.529331 |
| 27               | 1                | 0              | -1.889793               | 1.010505  | -2.543081 |
| 28               | 8                | 0              | -0.087176               | -0.418379 | -0.847587 |
| 29               | 1                | 0              | -1.360242               | -0.563235 | 1.433597  |
| 30               | 6                | 0              | -4.213794               | 0.872820  | 1.694101  |
| 31               | 6                | 0              | -2.020669               | 1.371397  | 2.762608  |
| 32               | 1                | 0              | -4.810564               | 0.796628  | 0.782922  |
| 33               | 1                | 0              | -4.339063               | -0.059858 | 2.254172  |
| 34               | 1                | 0              | -4.637499               | 1.684027  | 2.298574  |
| 35               | 1                | 0              | -2.416742               | 2.265671  | 3.258709  |
| 36               | 1                | 0              | -2.175751               | 0.520287  | 3.435865  |
| 37               | 1                | 0              | -0.942266               | 1.501327  | 2.625328  |
| 38               | 26               | 0              | 1.557714                | -0.140753 | -0.162649 |
| 39               | 8                | 0              | 2.637499                | -1.690790 | -0.811844 |
| 40               | 6                | 0              | 2.914998                | -2.801206 | -0.247427 |
| 41               | 6                | 0              | 2.620328                | -3.107861 | 1.092089  |
| 42               | 6                | 0              | 1.987759                | -2.204140 | 1.957639  |
| 43               | 8                | 0              | 1.602926                | -1.029061 | 1.627662  |
| 44               | 6                | 0              | 3.616353                | -3.815916 | -1.120420 |
| 45               | 6                | 0              | 1.723341                | -2.590608 | 3.394652  |
| 46               | 1                | 0              | 2.905837                | -4.079164 | 1.475961  |
| 47               | 1                | 0              | 2.985141                | -4.040628 | -1.986383 |
| 48               | 1                | 0              | 3.844002                | -4.741913 | -0.588814 |
| 49               | 1                | 0              | 4.544073                | -3.380597 | -1.505752 |

|    |   |   |           |           |           |
|----|---|---|-----------|-----------|-----------|
| 50 | 1 | 0 | 2.091625  | -3.589794 | 3.635083  |
| 51 | 1 | 0 | 0.646356  | -2.546225 | 3.587718  |
| 52 | 1 | 0 | 2.196757  | -1.859603 | 4.058037  |
| 53 | 6 | 0 | -3.674891 | -1.522036 | -1.144390 |
| 54 | 6 | 0 | -4.524039 | -2.373237 | -0.174530 |
| 55 | 1 | 0 | -3.920572 | -3.161730 | 0.288796  |
| 56 | 1 | 0 | -4.948616 | -1.762331 | 0.627115  |
| 57 | 1 | 0 | -5.352611 | -2.856228 | -0.706106 |
| 58 | 6 | 0 | -3.158568 | -2.441087 | -2.280126 |
| 59 | 1 | 0 | -2.567514 | -3.273014 | -1.882247 |
| 60 | 1 | 0 | -3.995914 | -2.865103 | -2.846619 |
| 61 | 1 | 0 | -2.521769 | -1.885826 | -2.976523 |
| 62 | 1 | 0 | -1.848748 | -1.959527 | -0.171151 |
| 63 | 6 | 0 | -4.584157 | -0.467398 | -1.798545 |
| 64 | 1 | 0 | -5.048047 | 0.201923  | -1.071525 |
| 65 | 1 | 0 | -4.050057 | 0.136281  | -2.536589 |
| 66 | 1 | 0 | -5.398585 | -0.977380 | -2.325922 |

-----

**iso-TS3**

Standard orientation:

| Center<br>Number | Atomic<br>Number | Atomic<br>Type | Coordinates (Angstroms) |           |           |
|------------------|------------------|----------------|-------------------------|-----------|-----------|
|                  |                  |                | X                       | Y         | Z         |
| 1                | 8                | 0              | -3.180091               | -0.848717 | 1.093553  |
| 2                | 6                | 0              | -4.336150               | -1.297550 | 0.768867  |
| 3                | 6                | 0              | -4.922358               | -1.164897 | -0.496598 |
| 4                | 6                | 0              | -4.306372               | -0.491712 | -1.572224 |
| 5                | 8                | 0              | -3.160797               | 0.057476  | -1.516739 |
| 6                | 6                | 0              | -5.025401               | -0.387243 | -2.900945 |
| 7                | 6                | 0              | -5.081701               | -2.014860 | 1.872992  |
| 8                | 1                | 0              | -5.906228               | -1.590345 | -0.652876 |
| 9                | 1                | 0              | -6.007543               | -0.864773 | -2.889209 |
| 10               | 1                | 0              | -4.410544               | -0.848629 | -3.680903 |
| 11               | 1                | 0              | -5.139943               | 0.668553  | -3.167624 |
| 12               | 1                | 0              | -4.474981               | -2.851856 | 2.234344  |
| 13               | 1                | 0              | -6.055513               | -2.388724 | 1.549696  |
| 14               | 1                | 0              | -5.220185               | -1.333406 | 2.719142  |
| 15               | 6                | 0              | 2.395805                | -2.422888 | 1.093534  |
| 16               | 6                | 0              | 1.657460                | -3.302243 | 0.066785  |
| 17               | 6                | 0              | 1.204388                | -2.580821 | -1.227470 |
| 18               | 6                | 0              | 0.690618                | -1.193864 | -0.913739 |
| 19               | 6                | 0              | 1.591200                | -0.106071 | -0.771998 |
| 20               | 6                | 0              | 3.710007                | -1.781307 | 0.708422  |
| 21               | 6                | 0              | 2.956185                | -0.170700 | -1.028034 |
| 22               | 1                | 0              | 2.590248                | -3.050033 | 1.982643  |
| 23               | 1                | 0              | 1.709938                | -1.642348 | 1.448247  |
| 24               | 1                | 0              | 0.764936                | -3.694548 | 0.566803  |
| 25               | 1                | 0              | 2.265838                | -4.173135 | -0.204303 |
| 26               | 1                | 0              | 0.401279                | -3.149801 | -1.703836 |
| 27               | 1                | 0              | 2.033091                | -2.525448 | -1.940288 |
| 28               | 8                | 0              | -0.560298               | -1.063916 | -0.702169 |

|    |    |   |           |           |           |
|----|----|---|-----------|-----------|-----------|
| 29 | 1  | 0 | 1.154615  | 0.816227  | -0.399650 |
| 30 | 6  | 0 | 4.682883  | -2.619743 | -0.079410 |
| 31 | 6  | 0 | 4.311423  | -0.975540 | 1.831682  |
| 32 | 6  | 0 | 3.805660  | 1.099757  | -1.148944 |
| 33 | 6  | 0 | 3.356866  | 1.803364  | -2.459921 |
| 34 | 6  | 0 | 5.300886  | 0.755506  | -1.291512 |
| 35 | 6  | 0 | 3.609128  | 2.077859  | 0.026275  |
| 36 | 1  | 0 | 3.319666  | -0.991904 | -1.638103 |
| 37 | 1  | 0 | 4.243239  | -3.038109 | -0.990809 |
| 38 | 1  | 0 | 5.575207  | -2.054335 | -0.362293 |
| 39 | 1  | 0 | 5.025913  | -3.477866 | 0.524306  |
| 40 | 1  | 0 | 4.619305  | -1.647383 | 2.652597  |
| 41 | 1  | 0 | 5.203890  | -0.420972 | 1.529961  |
| 42 | 1  | 0 | 3.590276  | -0.270137 | 2.256619  |
| 43 | 1  | 0 | 3.965340  | 2.698299  | -2.636687 |
| 44 | 1  | 0 | 3.472209  | 1.141937  | -3.325446 |
| 45 | 1  | 0 | 5.881885  | 1.661554  | -1.494607 |
| 46 | 1  | 0 | 4.188846  | 2.990954  | -0.149112 |
| 47 | 1  | 0 | 2.562823  | 2.372968  | 0.148458  |
| 48 | 1  | 0 | 3.947396  | 1.644501  | 0.970329  |
| 49 | 1  | 0 | 2.306873  | 2.104842  | -2.406708 |
| 50 | 1  | 0 | 5.705247  | 0.300225  | -0.384801 |
| 51 | 1  | 0 | 5.469593  | 0.061472  | -2.122835 |
| 52 | 26 | 0 | -1.855222 | 0.163640  | 0.018480  |
| 53 | 8  | 0 | -1.506831 | 2.078642  | -0.421214 |
| 54 | 6  | 0 | -0.956323 | 3.010155  | 0.263009  |
| 55 | 6  | 0 | -0.339630 | 2.829788  | 1.510229  |
| 56 | 6  | 0 | -0.288778 | 1.586837  | 2.178731  |
| 57 | 8  | 0 | -0.763150 | 0.501981  | 1.718034  |
| 58 | 6  | 0 | -1.001950 | 4.387132  | -0.362837 |
| 59 | 6  | 0 | 0.363100  | 1.501966  | 3.543816  |
| 60 | 1  | 0 | 0.088789  | 3.695447  | 2.000771  |
| 61 | 1  | 0 | -0.551609 | 4.347759  | -1.360094 |
| 62 | 1  | 0 | -0.487963 | 5.140850  | 0.237409  |
| 63 | 1  | 0 | -2.046690 | 4.686675  | -0.498382 |
| 64 | 1  | 0 | 0.790114  | 2.452976  | 3.869397  |
| 65 | 1  | 0 | 1.149105  | 0.739985  | 3.524581  |
| 66 | 1  | 0 | -0.381016 | 1.172598  | 4.276804  |

-----  
**iso-IM3**

Standard orientation:

| Center<br>Number | Atomic<br>Number | Atomic<br>Type | Coordinates (Angstroms) |           |           |
|------------------|------------------|----------------|-------------------------|-----------|-----------|
|                  |                  |                | X                       | Y         | Z         |
| 1                | 8                | 0              | -3.177095               | -0.796173 | 1.165443  |
| 2                | 6                | 0              | -4.280919               | -1.367973 | 0.860045  |
| 3                | 6                | 0              | -4.879413               | -1.315695 | -0.406875 |
| 4                | 6                | 0              | -4.322536               | -0.604090 | -1.483113 |
| 5                | 8                | 0              | -3.228020               | 0.050321  | -1.424449 |
| 6                | 6                | 0              | -5.028339               | -0.572324 | -2.818896 |
| 7                | 6                | 0              | -4.943475               | -2.131925 | 1.982611  |
| 8                | 1                | 0              | -5.817121               | -1.835309 | -0.558461 |
| 9                | 1                | 0              | -5.970690               | -1.123609 | -2.809945 |

|    |    |   |           |           |           |
|----|----|---|-----------|-----------|-----------|
| 10 | 1  | 0 | -4.368724 | -0.996322 | -3.583219 |
| 11 | 1  | 0 | -5.218188 | 0.467935  | -3.102259 |
| 12 | 1  | 0 | -4.261598 | -2.911144 | 2.338787  |
| 13 | 1  | 0 | -5.887144 | -2.589160 | 1.678879  |
| 14 | 1  | 0 | -5.122113 | -1.455044 | 2.824427  |
| 15 | 6  | 0 | 2.634935  | -2.509772 | 1.014014  |
| 16 | 6  | 0 | 1.927267  | -3.379570 | -0.042580 |
| 17 | 6  | 0 | 1.122391  | -2.604727 | -1.124458 |
| 18 | 6  | 0 | 0.693773  | -1.229630 | -0.656763 |
| 19 | 6  | 0 | 1.620119  | -0.279963 | -0.374262 |
| 20 | 6  | 0 | 3.712337  | -1.476223 | 0.556539  |
| 21 | 6  | 0 | 3.107479  | -0.509534 | -0.565911 |
| 22 | 1  | 0 | 3.127055  | -3.189062 | 1.722696  |
| 23 | 1  | 0 | 1.869018  | -1.979738 | 1.589291  |
| 24 | 1  | 0 | 1.240125  | -4.037328 | 0.503021  |
| 25 | 1  | 0 | 2.646964  | -4.042451 | -0.536937 |
| 26 | 1  | 0 | 0.234496  | -3.170493 | -1.418063 |
| 27 | 1  | 0 | 1.737708  | -2.491761 | -2.025714 |
| 28 | 8  | 0 | -0.618434 | -1.055675 | -0.497629 |
| 29 | 1  | 0 | 1.272474  | 0.671569  | 0.013821  |
| 30 | 6  | 0 | 4.917821  | -2.275944 | 0.010724  |
| 31 | 6  | 0 | 4.145719  | -0.737327 | 1.839140  |
| 32 | 6  | 0 | 3.821049  | 0.855325  | -0.943123 |
| 33 | 6  | 0 | 3.181028  | 1.335362  | -2.270146 |
| 34 | 6  | 0 | 5.330209  | 0.688932  | -1.215612 |
| 35 | 6  | 0 | 3.644544  | 1.988118  | 0.094821  |
| 36 | 1  | 0 | 3.213220  | -1.104495 | -1.484699 |
| 37 | 1  | 0 | 4.666396  | -2.802213 | -0.916745 |
| 38 | 1  | 0 | 5.785709  | -1.647438 | -0.192700 |
| 39 | 1  | 0 | 5.229422  | -3.031045 | 0.742119  |
| 40 | 1  | 0 | 4.422465  | -1.463373 | 2.612858  |
| 41 | 1  | 0 | 5.013949  | -0.092597 | 1.679020  |
| 42 | 1  | 0 | 3.332530  | -0.124191 | 2.241793  |
| 43 | 1  | 0 | 3.634312  | 2.279532  | -2.593104 |
| 44 | 1  | 0 | 3.334427  | 0.601510  | -3.069834 |
| 45 | 1  | 0 | 5.733358  | 1.618477  | -1.634258 |
| 46 | 1  | 0 | 4.091287  | 2.909518  | -0.297088 |
| 47 | 1  | 0 | 2.593465  | 2.207625  | 0.303464  |
| 48 | 1  | 0 | 4.136234  | 1.769023  | 1.044035  |
| 49 | 1  | 0 | 2.103304  | 1.491383  | -2.169535 |
| 50 | 1  | 0 | 5.900301  | 0.472235  | -0.308770 |
| 51 | 1  | 0 | 5.524581  | -0.108497 | -1.940484 |
| 52 | 26 | 0 | -1.867167 | 0.171014  | 0.030894  |
| 53 | 8  | 0 | -1.450642 | 1.959476  | -0.729665 |
| 54 | 6  | 0 | -0.853543 | 2.972868  | -0.225947 |
| 55 | 6  | 0 | -0.399949 | 3.047038  | 1.100067  |
| 56 | 6  | 0 | -0.578256 | 2.002271  | 2.024684  |
| 57 | 8  | 0 | -1.145865 | 0.892274  | 1.752619  |
| 58 | 6  | 0 | -0.654399 | 4.139785  | -1.164238 |
| 59 | 6  | 0 | -0.087155 | 2.154665  | 3.445454  |
| 60 | 1  | 0 | 0.087127  | 3.955457  | 1.431339  |
| 61 | 1  | 0 | -0.069969 | 3.810771  | -2.029692 |
| 62 | 1  | 0 | -0.149127 | 4.981093  | -0.686078 |
| 63 | 1  | 0 | -1.627936 | 4.467823  | -1.542825 |

|    |   |   |           |          |          |
|----|---|---|-----------|----------|----------|
| 64 | 1 | 0 | 0.374652  | 3.126804 | 3.628399 |
| 65 | 1 | 0 | 0.637735  | 1.363098 | 3.661920 |
| 66 | 1 | 0 | -0.927032 | 2.015273 | 4.133676 |

-----  
**TS4**

Standard orientation:

| Center<br>Number | Atomic<br>Number | Atomic<br>Type | Coordinates (Angstroms) |           |           |
|------------------|------------------|----------------|-------------------------|-----------|-----------|
|                  |                  |                | X                       | Y         | Z         |
| 1                | 8                | 0              | -1.163427               | -1.788714 | -0.254639 |
| 2                | 6                | 0              | -2.016119               | -2.701064 | 0.017218  |
| 3                | 6                | 0              | -3.326812               | -2.458057 | 0.458144  |
| 4                | 6                | 0              | -3.853318               | -1.167086 | 0.620347  |
| 5                | 8                | 0              | -3.194685               | -0.087229 | 0.433788  |
| 6                | 6                | 0              | -5.296264               | -0.984633 | 1.030601  |
| 7                | 6                | 0              | -1.539066               | -4.121486 | -0.180307 |
| 8                | 1                | 0              | -3.972252               | -3.306018 | 0.649759  |
| 9                | 1                | 0              | -5.815485               | -1.934304 | 1.173124  |
| 10               | 1                | 0              | -5.816767               | -0.398658 | 0.266024  |
| 11               | 1                | 0              | -5.337456               | -0.405944 | 1.959159  |
| 12               | 1                | 0              | -1.195754               | -4.249424 | -1.212013 |
| 13               | 1                | 0              | -2.314640               | -4.858875 | 0.035413  |
| 14               | 1                | 0              | -0.677014               | -4.303921 | 0.469844  |
| 15               | 6                | 0              | 2.894874                | -2.895259 | -0.504216 |
| 16               | 6                | 0              | 2.774933                | -2.373809 | -1.941679 |
| 17               | 6                | 0              | 1.662076                | -1.319161 | -2.034070 |
| 18               | 6                | 0              | 1.787482                | -0.222866 | -0.981412 |
| 19               | 6                | 0              | 2.659730                | -0.464970 | 0.232002  |
| 20               | 6                | 0              | 3.339414                | -1.821802 | 0.525809  |
| 21               | 6                | 0              | 3.114798                | 0.499154  | -0.856778 |
| 22               | 1                | 0              | 3.588884                | -3.744601 | -0.459139 |
| 23               | 1                | 0              | 1.910090                | -3.279061 | -0.205577 |
| 24               | 1                | 0              | 2.544732                | -3.203281 | -2.620970 |
| 25               | 1                | 0              | 3.733901                | -1.964261 | -2.284365 |
| 26               | 1                | 0              | 0.698842                | -1.815337 | -1.872848 |
| 27               | 1                | 0              | 1.634512                | -0.867688 | -3.035785 |
| 28               | 8                | 0              | 0.610530                | 0.515992  | -0.798306 |
| 29               | 1                | 0              | 2.283905                | 0.034974  | 1.121170  |
| 30               | 6                | 0              | 4.874905                | -1.679039 | 0.516012  |
| 31               | 6                | 0              | 2.901909                | -2.287360 | 1.929748  |
| 32               | 6                | 0              | 3.312774                | 2.016205  | -0.677874 |
| 33               | 6                | 0              | 2.875343                | 2.714527  | -1.983547 |
| 34               | 6                | 0              | 4.817114                | 2.275684  | -0.444809 |
| 35               | 6                | 0              | 2.527221                | 2.616026  | 0.503198  |
| 36               | 1                | 0              | 3.870579                | 0.096239  | -1.532122 |
| 37               | 1                | 0              | 5.258279                | -1.420864 | -0.476069 |
| 38               | 1                | 0              | 5.199059                | -0.893449 | 1.207334  |
| 39               | 1                | 0              | 5.352800                | -2.616848 | 0.823445  |
| 40               | 1                | 0              | 3.291232                | -3.288032 | 2.152004  |
| 41               | 1                | 0              | 3.277106                | -1.605960 | 2.703178  |
| 42               | 1                | 0              | 1.809727                | -2.318462 | 2.006448  |
| 43               | 1                | 0              | 3.082616                | 3.790632  | -1.942002 |
| 44               | 1                | 0              | 3.411673                | 2.306260  | -2.848415 |

|    |    |   |           |           |           |
|----|----|---|-----------|-----------|-----------|
| 45 | 1  | 0 | 5.013884  | 3.347972  | -0.328755 |
| 46 | 1  | 0 | 2.698215  | 3.698248  | 0.546931  |
| 47 | 1  | 0 | 1.456224  | 2.437002  | 0.397978  |
| 48 | 1  | 0 | 2.857523  | 2.196218  | 1.459668  |
| 49 | 1  | 0 | 1.803396  | 2.579226  | -2.153255 |
| 50 | 1  | 0 | 5.169811  | 1.769112  | 0.460423  |
| 51 | 1  | 0 | 5.420505  | 1.915439  | -1.286253 |
| 52 | 26 | 0 | -1.238252 | 0.196169  | 0.104671  |
| 53 | 8  | 0 | -1.398556 | 0.744207  | -1.847840 |
| 54 | 6  | 0 | -2.056141 | 0.051674  | -2.897079 |
| 55 | 6  | 0 | -3.393679 | 0.711569  | -3.232880 |
| 56 | 6  | 0 | -3.247602 | 2.153367  | -3.725420 |
| 57 | 1  | 0 | -0.197015 | 0.646745  | -1.677350 |
| 58 | 1  | 0 | -2.660451 | 2.197032  | -4.650736 |
| 59 | 1  | 0 | -4.223850 | 2.605915  | -3.928766 |
| 60 | 1  | 0 | -3.896703 | 0.098517  | -3.993777 |
| 61 | 1  | 0 | -4.024372 | 0.686629  | -2.335708 |
| 62 | 1  | 0 | -1.407590 | 0.060639  | -3.787027 |
| 63 | 1  | 0 | -2.218229 | -1.002131 | -2.625586 |
| 64 | 1  | 0 | -2.736237 | 2.761857  | -2.974906 |
| 65 | 8  | 0 | -1.420776 | 2.077334  | 0.735691  |
| 66 | 6  | 0 | -1.217749 | 2.596531  | 1.883253  |
| 67 | 6  | 0 | -0.761352 | 1.886414  | 3.007445  |
| 68 | 6  | 0 | -0.466359 | 0.516004  | 2.982942  |
| 69 | 8  | 0 | -0.578895 | -0.236329 | 1.952446  |
| 70 | 6  | 0 | -1.495167 | 4.077945  | 1.984766  |
| 71 | 6  | 0 | 0.023444  | -0.172744 | 4.235885  |
| 72 | 1  | 0 | -0.626099 | 2.425938  | 3.936373  |
| 73 | 1  | 0 | -0.846388 | 4.611853  | 1.282695  |
| 74 | 1  | 0 | -1.333886 | 4.467143  | 2.991863  |
| 75 | 1  | 0 | -2.527793 | 4.272526  | 1.678289  |
| 76 | 1  | 0 | 0.102843  | 0.507968  | 5.085695  |
| 77 | 1  | 0 | 1.001195  | -0.624896 | 4.040611  |
| 78 | 1  | 0 | -0.660869 | -0.989136 | 4.489632  |

-----

**IM4**

Standard orientation:

| Center<br>Number | Atomic<br>Number | Atomic<br>Type | Coordinates (Angstroms) |          |           |
|------------------|------------------|----------------|-------------------------|----------|-----------|
|                  |                  |                | X                       | Y        | Z         |
| 1                | 8                | 0              | 1.207509                | 1.737247 | -0.758771 |
| 2                | 6                | 0              | 2.019343                | 2.708567 | -0.621407 |
| 3                | 6                | 0              | 3.303561                | 2.605990 | -0.051937 |
| 4                | 6                | 0              | 3.856687                | 1.403271 | 0.406371  |
| 5                | 8                | 0              | 3.257868                | 0.270267 | 0.397574  |
| 6                | 6                | 0              | 5.266532                | 1.379090 | 0.950487  |
| 7                | 6                | 0              | 1.536105                | 4.047621 | -1.133725 |
| 8                | 1                | 0              | 3.909117                | 3.501701 | 0.006474  |
| 9                | 1                | 0              | 5.739066                | 2.363195 | 0.937435  |
| 10               | 1                | 0              | 5.869033                | 0.680982 | 0.360031  |
| 11               | 1                | 0              | 5.250915                | 0.998276 | 1.976936  |
| 12               | 1                | 0              | 1.282274                | 3.958952 | -2.195098 |
| 13               | 1                | 0              | 2.276831                | 4.839514 | -1.006599 |

|    |    |   |           |           |           |
|----|----|---|-----------|-----------|-----------|
| 14 | 1  | 0 | 0.618166  | 4.324724  | -0.604860 |
| 15 | 6  | 0 | -3.009204 | 2.760446  | -0.826951 |
| 16 | 6  | 0 | -2.937941 | 2.049709  | -2.184468 |
| 17 | 6  | 0 | -1.843297 | 0.971682  | -2.162173 |
| 18 | 6  | 0 | -1.977128 | 0.032157  | -0.974765 |
| 19 | 6  | 0 | -2.784167 | 0.444234  | 0.224467  |
| 20 | 6  | 0 | -3.429190 | 1.843602  | 0.354882  |
| 21 | 6  | 0 | -3.298496 | -0.651603 | -0.703396 |
| 22 | 1  | 0 | -3.696161 | 3.614805  | -0.877522 |
| 23 | 1  | 0 | -2.013303 | 3.171680  | -0.613731 |
| 24 | 1  | 0 | -2.711494 | 2.775718  | -2.973767 |
| 25 | 1  | 0 | -3.911587 | 1.615434  | -2.446108 |
| 26 | 1  | 0 | -0.867258 | 1.462098  | -2.079989 |
| 27 | 1  | 0 | -1.844000 | 0.395498  | -3.098286 |
| 28 | 8  | 0 | -0.779916 | -0.683203 | -0.687692 |
| 29 | 1  | 0 | -2.375089 | 0.061175  | 1.155691  |
| 30 | 6  | 0 | -4.965453 | 1.728984  | 0.421242  |
| 31 | 6  | 0 | -2.926770 | 2.483729  | 1.664717  |
| 32 | 6  | 0 | -3.505583 | -2.125162 | -0.300497 |
| 33 | 6  | 0 | -3.125083 | -3.015466 | -1.503129 |
| 34 | 6  | 0 | -5.005232 | -2.319227 | 0.013220  |
| 35 | 6  | 0 | -2.692486 | -2.561486 | 0.933644  |
| 36 | 1  | 0 | -4.075641 | -0.331471 | -1.398039 |
| 37 | 1  | 0 | -5.392563 | 1.353924  | -0.514212 |
| 38 | 1  | 0 | -5.272223 | 1.044887  | 1.219928  |
| 39 | 1  | 0 | -5.416579 | 2.707297  | 0.623901  |
| 40 | 1  | 0 | -3.292695 | 3.512276  | 1.765789  |
| 41 | 1  | 0 | -3.277819 | 1.919340  | 2.537183  |
| 42 | 1  | 0 | -1.832229 | 2.503564  | 1.689964  |
| 43 | 1  | 0 | -3.358900 | -4.067348 | -1.301935 |
| 44 | 1  | 0 | -3.673289 | -2.718573 | -2.404823 |
| 45 | 1  | 0 | -5.212072 | -3.357637 | 0.296496  |
| 46 | 1  | 0 | -2.874159 | -3.623568 | 1.134657  |
| 47 | 1  | 0 | -1.620942 | -2.417305 | 0.785485  |
| 48 | 1  | 0 | -2.994757 | -2.006205 | 1.828064  |
| 49 | 1  | 0 | -2.054454 | -2.947016 | -1.719118 |
| 50 | 1  | 0 | -5.321077 | -1.675448 | 0.841417  |
| 51 | 1  | 0 | -5.630720 | -2.079635 | -0.854578 |
| 52 | 26 | 0 | 1.370554  | -0.164005 | -0.051049 |
| 53 | 8  | 0 | 1.528018  | -0.949014 | -1.727884 |
| 54 | 6  | 0 | 2.471934  | -0.724854 | -2.743538 |
| 55 | 6  | 0 | 3.627636  | -1.732634 | -2.687749 |
| 56 | 6  | 0 | 3.166768  | -3.184289 | -2.837070 |
| 57 | 1  | 0 | -0.397416 | -1.048424 | -1.509876 |
| 58 | 1  | 0 | 2.668043  | -3.343098 | -3.801077 |
| 59 | 1  | 0 | 4.011283  | -3.879464 | -2.780717 |
| 60 | 1  | 0 | 4.343414  | -1.476843 | -3.482000 |
| 61 | 1  | 0 | 4.150258  | -1.602897 | -1.732195 |
| 62 | 1  | 0 | 1.970647  | -0.806993 | -3.722941 |
| 63 | 1  | 0 | 2.880502  | 0.297185  | -2.680535 |
| 64 | 1  | 0 | 2.457594  | -3.441094 | -2.045642 |
| 65 | 8  | 0 | 1.459270  | -1.900915 | 0.948216  |
| 66 | 6  | 0 | 1.365411  | -2.138877 | 2.199312  |
| 67 | 6  | 0 | 0.977022  | -1.198160 | 3.165914  |



|    |   |   |           |           |          |
|----|---|---|-----------|-----------|----------|
| 68 | 6 | 0 | 0.610146  | 0.122458  | 2.854628 |
| 69 | 8 | 0 | 0.605221  | 0.621825  | 1.680013 |
| 70 | 6 | 0 | 1.694961  | -3.554790 | 2.615645 |
| 71 | 6 | 0 | 0.169270  | 1.052511  | 3.964745 |
| 72 | 1 | 0 | 0.935949  | -1.512579 | 4.201415 |
| 73 | 1 | 0 | 1.022596  | -4.247533 | 2.098897 |
| 74 | 1 | 0 | 1.610210  | -3.707412 | 3.693509 |
| 75 | 1 | 0 | 2.712709  | -3.796844 | 2.292962 |
| 76 | 1 | 0 | 0.245367  | 0.594495  | 4.953058 |
| 77 | 1 | 0 | -0.867460 | 1.359250  | 3.791240 |
| 78 | 1 | 0 | 0.779674  | 1.960882  | 3.937947 |

-----  
**TS5**

Standard orientation:

| Center<br>Number | Atomic<br>Number | Atomic<br>Type | Coordinates (Angstroms) |           |           |
|------------------|------------------|----------------|-------------------------|-----------|-----------|
|                  |                  |                | X                       | Y         | Z         |
| 1                | 8                | 0              | 2.854546                | -0.203760 | -0.742753 |
| 2                | 8                | 0              | 1.397683                | -1.355329 | 1.259287  |
| 3                | 6                | 0              | 2.380810                | -2.165905 | 1.332991  |
| 4                | 6                | 0              | 3.707020                | -1.118106 | -0.464425 |
| 5                | 6                | 0              | 3.531228                | -2.092389 | 0.527768  |
| 6                | 6                | 0              | 2.247567                | -3.258294 | 2.367941  |
| 7                | 1                | 0              | 1.335120                | -3.830110 | 2.170695  |
| 8                | 1                | 0              | 3.104619                | -3.934534 | 2.378899  |
| 9                | 1                | 0              | 2.132270                | -2.803075 | 3.357052  |
| 10               | 1                | 0              | 4.314477                | -2.824750 | 0.677305  |
| 11               | 6                | 0              | 4.967658                | -1.104179 | -1.297682 |
| 12               | 1                | 0              | 5.661790                | -1.900118 | -1.021161 |
| 13               | 1                | 0              | 5.464008                | -0.134812 | -1.184687 |
| 14               | 1                | 0              | 4.704150                | -1.206133 | -2.355673 |
| 15               | 14               | 0              | -1.639561               | -0.145197 | -0.828693 |
| 16               | 8                | 0              | -0.012314               | -0.445678 | -1.421054 |
| 17               | 26               | 0              | 1.138651                | 0.300636  | 0.159248  |
| 18               | 8                | 0              | 1.185031                | 2.037886  | -0.827510 |
| 19               | 8                | 0              | 1.516310                | 1.362990  | 1.785791  |
| 20               | 6                | 0              | 1.022148                | 3.219334  | -0.377736 |
| 21               | 6                | 0              | 1.363335                | 2.622129  | 1.989877  |
| 22               | 6                | 0              | 1.090309                | 3.559062  | 0.987576  |
| 23               | 6                | 0              | 0.753596                | 4.281900  | -1.414264 |
| 24               | 1                | 0              | 1.515497                | 4.228455  | -2.197753 |
| 25               | 1                | 0              | 0.730932                | 5.288071  | -0.991040 |
| 26               | 6                | 0              | 1.511931                | 3.062461  | 3.426454  |
| 27               | 1                | 0              | 2.498882                | 2.764540  | 3.795397  |
| 28               | 1                | 0              | 1.391302                | 4.140572  | 3.548473  |
| 29               | 1                | 0              | 0.967693                | 4.597427  | 1.268589  |
| 30               | 1                | 0              | -0.212139               | 4.064268  | -1.882784 |
| 31               | 1                | 0              | 0.769832                | 2.542924  | 4.041566  |
| 32               | 1                | 0              | -0.584913               | 0.169004  | 0.545153  |
| 33               | 6                | 0              | 0.321301                | -0.625309 | -2.816108 |
| 34               | 6                | 0              | 0.174307                | -2.081615 | -3.248825 |
| 35               | 6                | 0              | 1.105326                | -3.049529 | -2.514331 |
| 36               | 1                | 0              | 0.944382                | -4.079242 | -2.849477 |

|    |   |   |           |           |           |
|----|---|---|-----------|-----------|-----------|
| 37 | 1 | 0 | 0.932696  | -3.015559 | -1.435206 |
| 38 | 1 | 0 | 2.157866  | -2.801409 | -2.692259 |
| 39 | 1 | 0 | 0.365638  | -2.124093 | -4.330077 |
| 40 | 1 | 0 | -0.869951 | -2.381072 | -3.104171 |
| 41 | 1 | 0 | 1.353319  | -0.281011 | -2.928508 |
| 42 | 1 | 0 | -0.327858 | 0.019220  | -3.417275 |
| 43 | 1 | 0 | -2.288242 | -0.552540 | -2.130223 |
| 44 | 8 | 0 | -2.043952 | 1.492857  | -0.760958 |
| 45 | 6 | 0 | -3.301688 | 2.017347  | -0.327658 |
| 46 | 1 | 0 | -3.653797 | 1.441218  | 0.541971  |
| 47 | 6 | 0 | -4.349885 | 1.916740  | -1.439542 |
| 48 | 1 | 0 | -4.520861 | 0.875786  | -1.727328 |
| 49 | 1 | 0 | -5.305085 | 2.342507  | -1.112114 |
| 50 | 1 | 0 | -4.011369 | 2.463460  | -2.326137 |
| 51 | 6 | 0 | -3.070782 | 3.461867  | 0.112045  |
| 52 | 1 | 0 | -3.991185 | 3.900980  | 0.512069  |
| 53 | 1 | 0 | -2.295661 | 3.505632  | 0.882254  |
| 54 | 1 | 0 | -2.742813 | 4.068959  | -0.739242 |
| 55 | 6 | 0 | -2.547148 | -1.367719 | 0.311290  |
| 56 | 6 | 0 | -2.275959 | -1.524712 | 1.681897  |
| 57 | 6 | 0 | -3.573727 | -2.153224 | -0.245169 |
| 58 | 6 | 0 | -3.003408 | -2.421680 | 2.465762  |
| 59 | 1 | 0 | -1.477318 | -0.942178 | 2.132872  |
| 60 | 6 | 0 | -4.305527 | -3.053371 | 0.532129  |
| 61 | 1 | 0 | -3.799374 | -2.058675 | -1.305032 |
| 62 | 6 | 0 | -4.021205 | -3.187576 | 1.892147  |
| 63 | 1 | 0 | -2.775914 | -2.525993 | 3.523677  |
| 64 | 1 | 0 | -5.093519 | -3.649223 | 0.078575  |
| 65 | 1 | 0 | -4.587197 | -3.887413 | 2.501588  |

-----  
**Product**

Standard orientation:

| Center<br>Number | Atomic<br>Number | Atomic<br>Type | Coordinates (Angstroms) |           |           |
|------------------|------------------|----------------|-------------------------|-----------|-----------|
|                  |                  |                | X                       | Y         | Z         |
| 1                | 6                | 0              | -2.706949               | 0.329838  | -0.402308 |
| 2                | 6                | 0              | -1.954384               | 1.345505  | -1.270881 |
| 3                | 6                | 0              | -0.913138               | 2.096048  | -0.428267 |
| 4                | 6                | 0              | 0.003925                | 1.164966  | 0.351970  |
| 5                | 6                | 0              | -0.430082               | -0.255113 | 0.602675  |
| 6                | 6                | 0              | -1.814687               | -0.800946 | 0.180842  |
| 7                | 6                | 0              | 0.704947                | 0.036095  | -0.374140 |
| 8                | 1                | 0              | -3.530945               | -0.121684 | -0.968919 |
| 9                | 1                | 0              | -3.168767               | 0.879214  | 0.429424  |
| 10               | 1                | 0              | -2.661129               | 2.065067  | -1.700097 |
| 11               | 1                | 0              | -1.477265               | 0.847021  | -2.124643 |
| 12               | 1                | 0              | -1.436034               | 2.721545  | 0.307190  |
| 13               | 1                | 0              | -0.318089               | 2.774107  | -1.057239 |
| 14               | 8                | 0              | 0.642708                | 1.797161  | 1.444394  |
| 15               | 1                | 0              | -0.086107               | -0.634220 | 1.562116  |
| 16               | 6                | 0              | -1.659638               | -1.939399 | -0.847980 |
| 17               | 6                | 0              | -2.510137               | -1.369931 | 1.434506  |
| 18               | 6                | 0              | 2.170204                | -0.400873 | -0.179500 |

|    |   |   |           |           |           |
|----|---|---|-----------|-----------|-----------|
| 19 | 6 | 0 | 3.086535  | 0.715710  | -0.726600 |
| 20 | 6 | 0 | 2.398544  | -1.682940 | -1.008783 |
| 21 | 6 | 0 | 2.546359  | -0.695966 | 1.285399  |
| 22 | 1 | 0 | 0.422838  | -0.024813 | -1.425663 |
| 23 | 1 | 0 | -1.242087 | -1.585176 | -1.795609 |
| 24 | 1 | 0 | -0.994749 | -2.722559 | -0.467908 |
| 25 | 1 | 0 | -2.631178 | -2.398473 | -1.064838 |
| 26 | 1 | 0 | -3.524694 | -1.711980 | 1.199499  |
| 27 | 1 | 0 | -1.955436 | -2.223480 | 1.840928  |
| 28 | 1 | 0 | -2.583660 | -0.611251 | 2.221375  |
| 29 | 1 | 0 | 4.138072  | 0.406700  | -0.710547 |
| 30 | 1 | 0 | 2.828498  | 0.970537  | -1.760889 |
| 31 | 1 | 0 | 3.433012  | -2.031822 | -0.910197 |
| 32 | 1 | 0 | 3.611991  | -0.943556 | 1.351276  |
| 33 | 1 | 0 | 2.345933  | 0.159983  | 1.932496  |
| 34 | 1 | 0 | 1.988269  | -1.554261 | 1.674177  |
| 35 | 1 | 0 | 3.001634  | 1.626773  | -0.124399 |
| 36 | 1 | 0 | 1.738265  | -2.490147 | -0.673900 |
| 37 | 1 | 0 | 2.204309  | -1.511308 | -2.073863 |
| 38 | 1 | 0 | 1.226664  | 2.478526  | 1.083478  |

-----  
**Ph(iPrO)-SiH<sub>2</sub>**

Standard orientation:

| Center<br>Number | Atomic<br>Number | Atomic<br>Type | Coordinates (Angstroms) |           |           |
|------------------|------------------|----------------|-------------------------|-----------|-----------|
|                  |                  |                | X                       | Y         | Z         |
| 1                | 6                | 0              | 2.646252                | 0.604219  | -0.068129 |
| 2                | 1                | 0              | 3.666517                | 0.662443  | -0.469462 |
| 3                | 6                | 0              | 2.740285                | 0.331122  | 1.433407  |
| 4                | 1                | 0              | 1.747260                | 0.304991  | 1.897170  |
| 5                | 1                | 0              | 3.238329                | -0.623130 | 1.628131  |
| 6                | 1                | 0              | 3.314828                | 1.122893  | 1.925351  |
| 7                | 6                | 0              | 1.929518                | 1.918382  | -0.380570 |
| 8                | 1                | 0              | 2.469245                | 2.764130  | 0.059272  |
| 9                | 1                | 0              | 1.872949                | 2.070901  | -1.462018 |
| 10               | 1                | 0              | 0.911037                | 1.914412  | 0.020160  |
| 11               | 6                | 0              | -0.883383               | -0.584134 | -0.137449 |
| 12               | 6                | 0              | -1.491583               | -0.564817 | 1.130689  |
| 13               | 6                | 0              | -1.555923               | 0.052525  | -1.198442 |
| 14               | 6                | 0              | -2.718964               | 0.068938  | 1.336630  |
| 15               | 1                | 0              | -1.002498               | -1.056093 | 1.969121  |
| 16               | 6                | 0              | -2.780959               | 0.688675  | -0.998930 |
| 17               | 1                | 0              | -1.118408               | 0.050469  | -2.194479 |
| 18               | 6                | 0              | -3.364132               | 0.697824  | 0.270965  |
| 19               | 1                | 0              | -3.171143               | 0.070476  | 2.324675  |
| 20               | 1                | 0              | -3.283555               | 1.173392  | -1.831501 |
| 21               | 1                | 0              | -4.319631               | 1.191051  | 0.427057  |
| 22               | 14               | 0              | 0.756899                | -1.463829 | -0.400298 |
| 23               | 1                | 0              | 1.013509                | -2.254123 | 0.838293  |
| 24               | 1                | 0              | 0.661527                | -2.372376 | -1.569110 |
| 25               | 8                | 0              | 2.034597                | -0.475281 | -0.785938 |

-----  
**Ph(iPrO)(nPrOH)SiH**

## Standard orientation:

| Center Number | Atomic Number | Atomic Type | Coordinates (Angstroms) |           |           |
|---------------|---------------|-------------|-------------------------|-----------|-----------|
|               |               |             | X                       | Y         | Z         |
| 1             | 14            | 0           | 0.323425                | 0.161793  | -0.681316 |
| 2             | 8             | 0           | 1.527517                | -0.890172 | -0.261205 |
| 3             | 6             | 0           | 2.917481                | -0.630053 | -0.478174 |
| 4             | 6             | 0           | 3.720564                | -1.897344 | -0.205556 |
| 5             | 6             | 0           | 3.602279                | -2.391073 | 1.238930  |
| 6             | 1             | 0           | 4.176656                | -3.310559 | 1.390588  |
| 7             | 1             | 0           | 2.558169                | -2.594243 | 1.491064  |
| 8             | 1             | 0           | 3.978347                | -1.641088 | 1.944607  |
| 9             | 1             | 0           | 4.770512                | -1.689278 | -0.451089 |
| 10            | 1             | 0           | 3.382409                | -2.678213 | -0.897808 |
| 11            | 1             | 0           | 3.244771                | 0.179748  | 0.188387  |
| 12            | 1             | 0           | 3.081595                | -0.297675 | -1.514105 |
| 13            | 1             | 0           | 0.379852                | 0.428179  | -2.149662 |
| 14            | 8             | 0           | 0.575019                | 1.555798  | 0.183929  |
| 15            | 6             | 0           | -0.209468               | 2.754864  | 0.086493  |
| 16            | 1             | 0           | -1.247708               | 2.490849  | -0.166953 |
| 17            | 6             | 0           | 0.356919                | 3.660066  | -1.007705 |
| 18            | 1             | 0           | 0.343378                | 3.157252  | -1.979249 |
| 19            | 1             | 0           | -0.229194               | 4.581450  | -1.092009 |
| 20            | 1             | 0           | 1.392756                | 3.928136  | -0.775212 |
| 21            | 6             | 0           | -0.198803               | 3.422995  | 1.458175  |
| 22            | 1             | 0           | -0.791526               | 4.343582  | 1.447336  |
| 23            | 1             | 0           | -0.613308               | 2.752097  | 2.215852  |
| 24            | 1             | 0           | 0.827366                | 3.672629  | 1.747099  |
| 25            | 6             | 0           | -1.323322               | -0.611203 | -0.264750 |
| 26            | 6             | 0           | -1.833181               | -0.589684 | 1.046592  |
| 27            | 6             | 0           | -2.092898               | -1.231605 | -1.264183 |
| 28            | 6             | 0           | -3.061545               | -1.177255 | 1.349806  |
| 29            | 1             | 0           | -1.262760               | -0.107092 | 1.836367  |
| 30            | 6             | 0           | -3.322195               | -1.822167 | -0.966256 |
| 31            | 1             | 0           | -1.728441               | -1.253604 | -2.289149 |
| 32            | 6             | 0           | -3.806788               | -1.795547 | 0.342717  |
| 33            | 1             | 0           | -3.439277               | -1.152948 | 2.368382  |
| 34            | 1             | 0           | -3.901750               | -2.298957 | -1.752003 |
| 35            | 1             | 0           | -4.764343               | -2.252342 | 0.577653  |

## 9. References

- 1) Grieco, P. A.; Pogonowski, C. S. *J. Am. Chem. Soc.*, **1973**, *95*, 3071-3072.
- 2) Zhu, K.; Hu, S.; Liu, M.; Peng, H.; Chen, F.-E. *Angew. Chem. Int. Ed.*, **2019**, *58*, 9923-9927.
- 3) Fernández, D. F.; Gulías, M.; Mascareñas, J. L.; López, F. *Angew. Chem. Int. Ed.* **2017**, *32*, 9541-9545.

- 4) Lakeland, C. P.; Watson, D. W.; Harrity, J. P. A. *Chem. Eur. J.* **2020**, *1*, 155-159.
- 5) García-Domínguez, P.; Lepore, I.; Erb, C.; Gronemeyer, H.; Altucci, L.; Álvarez, R. *Org. Biomol. Chem.* **2011**, *20*, 6979-6987.
- 6) McCourt, R. O.; Scanlan, E. M. *Chem. Eur. J.*, **2020**, *26*, 15804-15810.
- 7) Zhang, K.; Chang, L.; An, Q.; Wang, X.; Zuo, Z.; *J. Am. Chem. Soc.*, **2019**, *141*, 10556-10564.
- 8) Peil, S.; Bistoni, G.; Goddard, R.; Fürstner, A. *J. Am. Chem. Soc.*, **2020**, *142*, 18541-18553.
- 9) (a) Xie, T.; Zhou, L.; Shen, M.; Li, J.; Lv, X.; Wang, X. *Tetrahedron. Lett.*, **2015**, *56*, 3982-3987. (b) Lecornué, F.; Ollivier, J. *Org. Biomol. Chem.*, **2003**, 3600.
- 10) Frisch, M. J.; Trucks, G. W.; Schlegel, H. B.; Scuseria, G. E.; Robb, M. A.; Cheeseman, J. R.; Scalmani, G.; Barone, V.; Mennucci, B.; Petersson, G. A.; Nakatsuji, H.; Caricato, M.; Li, X.; Hratchian, H. P.; Izmaylov, A. F.; Bloino, J.; Zheng, G.; Sonnenberg, J. L.; Hada, M.; Ehara, M.; Toyota, K.; Fukuda, R.; Hasegawa, J.; Ishida, M.; Nakajima, T.; Honda, Y.; Kitao, O.; Nakai, H.; Vreven, T.; Montgomery, J. A.; Bearpark, M.; Heyd, J. J.; Brothers, E.; Kudin, K. N.; Staroverov, V. N.; Keith, T.; Kobayashi, R.; Normand, J.; Raghavachari, K.; Rendell, A.; Burant, J. C.; Iyengar, S. S.; Tomasi, J.; Cossi, M.; Rega, N.; Millam, J. M.; Klene, M.; Knox, J. E.; Cross, J. B.; Bakken, V.; Adamo, C.; Jaramillo, J.; Gomperts, R.; Stratmann, R. E.; Austin, A. J.; Cammi, R.; Pomelli, C.; Ochterski, J. W.; Martin, R. L.; Morokuma, K.; Zakrzewski, V. G.; Voth, G. A.; Salvador, P.; Dannenberg, J. J.; Dapprich, S.; Daniels, A. D.; Farkas, O.; Foresman, J. B.; Ortiz, J. V.; Cioslowski, J.; Fox, D. J. Gaussian, Inc., Wallingford CT, **2013**.
- 11) (a) Becke, A. D. *J. Chem. Phys.*, **1996**, *104*, 1040-10446; (b) Becke, A. D. *J. Chem. Phys.*, **1997**, *107*, 8554-8560.
- 12) Zhao, Y.; Truhlar, D. G. *Theor. Chem. Acc.*, **2008**, *120*, 215-241.
